# Supplementary material for: One-year follow-up of the CAPSID randomized trial for high-dose convalescent plasma in severe COVID-19 patients
Source: JCI journal article supplement (doi:10.1172/jci163657), 2022-11-03
Supplement: sd3 [file 3]

## ICMJE DISCLOSURE FORM

**Date:** 9/15/2022

**Your Name:** Prof. Dr. Hubert Schrezenmeier

**Manuscript Title:** One-year follow-up of the CAPSID randomized trial for high-dose convalescent plasma in severe COVID-19 patients

**Manuscript Number (if known):** 163657-JCI-CMED-RV-2

In the interest of transparency, we ask you to disclose all relationships/activities/interests listed below that are related to the content of your manuscript. "Related" means any relation with for-profit or not-for-profit third parties whose interests may be affected by the content of the manuscript. Disclosure represents a commitment to transparency and does not necessarily indicate a bias. If you are in doubt about whether to list a relationship/activity/interest, it is preferable that you do so.

The author's relationships/activities/interests should be defined broadly. For example, if your manuscript pertains to the epidemiology of hypertension, you should declare all relationships with manufacturers of antihypertensive medication, even if that medication is not mentioned in the manuscript.

In item #1 below, report all support for the work reported in this manuscript without time limit. For all other items, the time frame for disclosure is the past 36 months.

|                                                                                                                                                                                                                                      | Name all entities with whom you have this relationship or indicate none (add rows as needed)                                                                                   | Specifications/Comments (e.g., if payments were made to you or to your institution)                                                                                                                                                                                                                                                                                                                                                                                                                                                                                                                                                                                                                                                                                                                                                                                                                             |                                                                                                                                                                                                                                      |                                                                                                                                                                  |  |             |  |                                                                                                   |  |                                            |  |                                             |  |                                                             |
|--------------------------------------------------------------------------------------------------------------------------------------------------------------------------------------------------------------------------------------|--------------------------------------------------------------------------------------------------------------------------------------------------------------------------------|-----------------------------------------------------------------------------------------------------------------------------------------------------------------------------------------------------------------------------------------------------------------------------------------------------------------------------------------------------------------------------------------------------------------------------------------------------------------------------------------------------------------------------------------------------------------------------------------------------------------------------------------------------------------------------------------------------------------------------------------------------------------------------------------------------------------------------------------------------------------------------------------------------------------|--------------------------------------------------------------------------------------------------------------------------------------------------------------------------------------------------------------------------------------|------------------------------------------------------------------------------------------------------------------------------------------------------------------|--|-------------|--|---------------------------------------------------------------------------------------------------|--|--------------------------------------------|--|---------------------------------------------|--|-------------------------------------------------------------|
| Time frame: Since the initial planning of the work                                                                                                                                                                                   |                                                                                                                                                                                |                                                                                                                                                                                                                                                                                                                                                                                                                                                                                                                                                                                                                                                                                                                                                                                                                                                                                                                 |                                                                                                                                                                                                                                      |                                                                                                                                                                  |  |             |  |                                                                                                   |  |                                            |  |                                             |  |                                                             |
| <b>1</b>                                                                                                                                                                                                                             | All support for the present manuscript (e.g., funding, provision of study materials, medical writing, article processing charges, etc.)<br><b>No time limit for this item.</b> | <input type="checkbox"/> None<br><br><table border="1" style="width: 100%; border-collapse: collapse;"> <tr> <td style="width: 60%;">General funding started in 01.04.2020 and ended 31.05.2022<br/><b>German Federal Ministry of Health funded the clinical trial</b></td> <td style="width: 40%;">German Federal Ministry of Health funded clinical trial. Expense reimbursement for donor treatment paid by the sponsor DRK Blutspendedienst Baden-Württemberg He</td> </tr> <tr> <td></td> <td>3.555.082 €</td> </tr> <tr> <td></td> <td>up to 630 € per enrolled donor including for plasmapheresis, 420 € per subsequent plasma donation</td> </tr> <tr> <td></td> <td>up to 310 € per donor in the follow up per</td> </tr> <tr> <td></td> <td>up to 885 € per patient in the follow up pe</td> </tr> <tr> <td></td> <td>All paid to participating institution [not to investigator]</td> </tr> </table> | General funding started in 01.04.2020 and ended 31.05.2022<br><b>German Federal Ministry of Health funded the clinical trial</b>                                                                                                     | German Federal Ministry of Health funded clinical trial. Expense reimbursement for donor treatment paid by the sponsor DRK Blutspendedienst Baden-Württemberg He |  | 3.555.082 € |  | up to 630 € per enrolled donor including for plasmapheresis, 420 € per subsequent plasma donation |  | up to 310 € per donor in the follow up per |  | up to 885 € per patient in the follow up pe |  | All paid to participating institution [not to investigator] |
| General funding started in 01.04.2020 and ended 31.05.2022<br><b>German Federal Ministry of Health funded the clinical trial</b>                                                                                                     | German Federal Ministry of Health funded clinical trial. Expense reimbursement for donor treatment paid by the sponsor DRK Blutspendedienst Baden-Württemberg He               |                                                                                                                                                                                                                                                                                                                                                                                                                                                                                                                                                                                                                                                                                                                                                                                                                                                                                                                 |                                                                                                                                                                                                                                      |                                                                                                                                                                  |  |             |  |                                                                                                   |  |                                            |  |                                             |  |                                                             |
|                                                                                                                                                                                                                                      | 3.555.082 €                                                                                                                                                                    |                                                                                                                                                                                                                                                                                                                                                                                                                                                                                                                                                                                                                                                                                                                                                                                                                                                                                                                 |                                                                                                                                                                                                                                      |                                                                                                                                                                  |  |             |  |                                                                                                   |  |                                            |  |                                             |  |                                                             |
|                                                                                                                                                                                                                                      | up to 630 € per enrolled donor including for plasmapheresis, 420 € per subsequent plasma donation                                                                              |                                                                                                                                                                                                                                                                                                                                                                                                                                                                                                                                                                                                                                                                                                                                                                                                                                                                                                                 |                                                                                                                                                                                                                                      |                                                                                                                                                                  |  |             |  |                                                                                                   |  |                                            |  |                                             |  |                                                             |
|                                                                                                                                                                                                                                      | up to 310 € per donor in the follow up per                                                                                                                                     |                                                                                                                                                                                                                                                                                                                                                                                                                                                                                                                                                                                                                                                                                                                                                                                                                                                                                                                 |                                                                                                                                                                                                                                      |                                                                                                                                                                  |  |             |  |                                                                                                   |  |                                            |  |                                             |  |                                                             |
|                                                                                                                                                                                                                                      | up to 885 € per patient in the follow up pe                                                                                                                                    |                                                                                                                                                                                                                                                                                                                                                                                                                                                                                                                                                                                                                                                                                                                                                                                                                                                                                                                 |                                                                                                                                                                                                                                      |                                                                                                                                                                  |  |             |  |                                                                                                   |  |                                            |  |                                             |  |                                                             |
|                                                                                                                                                                                                                                      | All paid to participating institution [not to investigator]                                                                                                                    |                                                                                                                                                                                                                                                                                                                                                                                                                                                                                                                                                                                                                                                                                                                                                                                                                                                                                                                 |                                                                                                                                                                                                                                      |                                                                                                                                                                  |  |             |  |                                                                                                   |  |                                            |  |                                             |  |                                                             |
| Time frame: past 36 months                                                                                                                                                                                                           |                                                                                                                                                                                |                                                                                                                                                                                                                                                                                                                                                                                                                                                                                                                                                                                                                                                                                                                                                                                                                                                                                                                 |                                                                                                                                                                                                                                      |                                                                                                                                                                  |  |             |  |                                                                                                   |  |                                            |  |                                             |  |                                                             |
| <b>2</b>                                                                                                                                                                                                                             | Grants or contracts from any entity (if not indicated in item #1 above).                                                                                                       | <input checked="" type="checkbox"/> None<br><br><table border="1" style="width: 100%; border-collapse: collapse;"> <tr> <td style="width: 60%;">Funding from the European Commission for the European Collaborative Project "SUPPORT-E" ("Supporting high quality evaluation of COVID-19 convalescent plasma throughout Europe", no 101015756). H.S. participates in this project as</td> <td style="width: 40%;"></td> </tr> </table>                                                                                                                                                                                                                                                                                                                                                                                                                                                                          | Funding from the European Commission for the European Collaborative Project "SUPPORT-E" ("Supporting high quality evaluation of COVID-19 convalescent plasma throughout Europe", no 101015756). H.S. participates in this project as |                                                                                                                                                                  |  |             |  |                                                                                                   |  |                                            |  |                                             |  |                                                             |
| Funding from the European Commission for the European Collaborative Project "SUPPORT-E" ("Supporting high quality evaluation of COVID-19 convalescent plasma throughout Europe", no 101015756). H.S. participates in this project as |                                                                                                                                                                                |                                                                                                                                                                                                                                                                                                                                                                                                                                                                                                                                                                                                                                                                                                                                                                                                                                                                                                                 |                                                                                                                                                                                                                                      |                                                                                                                                                                  |  |             |  |                                                                                                   |  |                                            |  |                                             |  |                                                             |

|          |                                                                                                              | Name all entities with whom you have this relationship or indicate none (add rows as needed)                                                                                                | Specifications/Comments (e.g., if payments were made to you or to your institution) |
|----------|--------------------------------------------------------------------------------------------------------------|---------------------------------------------------------------------------------------------------------------------------------------------------------------------------------------------|-------------------------------------------------------------------------------------|
|          |                                                                                                              | Work Package leader. Funding is paid to the institution.                                                                                                                                    |                                                                                     |
|          |                                                                                                              | Funding from the Ministry for Science, Research and Arts of Baden-Württemberg, Germany for analysis of immune response in COVID-19 convalescent individuals. Funding is to the institution. |                                                                                     |
|          |                                                                                                              | The CAPSID trail has not been funded by these two grants but only by the German Federal Ministry of Health - see above #1                                                                   |                                                                                     |
| <b>3</b> | Royalties or licenses                                                                                        | <input checked="" type="checkbox"/> <b>None</b>                                                                                                                                             |                                                                                     |
|          |                                                                                                              |                                                                                                                                                                                             |                                                                                     |
|          |                                                                                                              |                                                                                                                                                                                             |                                                                                     |
|          |                                                                                                              | )                                                                                                                                                                                           |                                                                                     |
| <b>4</b> | Consulting fees                                                                                              | <input checked="" type="checkbox"/> <b>None</b>                                                                                                                                             |                                                                                     |
|          |                                                                                                              |                                                                                                                                                                                             |                                                                                     |
|          |                                                                                                              |                                                                                                                                                                                             |                                                                                     |
|          |                                                                                                              |                                                                                                                                                                                             |                                                                                     |
| <b>5</b> | Payment or honoraria for lectures, presentations, speakers bureaus, manuscript writing or educational events | <input checked="" type="checkbox"/> <b>None</b>                                                                                                                                             |                                                                                     |
|          |                                                                                                              |                                                                                                                                                                                             |                                                                                     |
|          |                                                                                                              |                                                                                                                                                                                             |                                                                                     |
|          |                                                                                                              |                                                                                                                                                                                             |                                                                                     |
| <b>6</b> | Payment for expert testimony                                                                                 | <input checked="" type="checkbox"/> <b>None</b>                                                                                                                                             |                                                                                     |
|          |                                                                                                              |                                                                                                                                                                                             |                                                                                     |
|          |                                                                                                              |                                                                                                                                                                                             |                                                                                     |
|          |                                                                                                              |                                                                                                                                                                                             |                                                                                     |
| <b>7</b> | Support for attending meetings and/or travel                                                                 | <input checked="" type="checkbox"/> <b>None</b>                                                                                                                                             |                                                                                     |
|          |                                                                                                              |                                                                                                                                                                                             |                                                                                     |
|          |                                                                                                              |                                                                                                                                                                                             |                                                                                     |
|          |                                                                                                              |                                                                                                                                                                                             |                                                                                     |

|           | Name all entities with whom you have this relationship or indicate none (add rows as needed)      | Specifications/Comments (e.g., if payments were made to you or to your institution)                                                                                |  |  |  |  |  |  |
|-----------|---------------------------------------------------------------------------------------------------|--------------------------------------------------------------------------------------------------------------------------------------------------------------------|--|--|--|--|--|--|
| <b>8</b>  | Patents planned, issued or pending                                                                | <input checked="" type="checkbox"/> <b>None</b><br><table border="1"> <tr><td></td><td></td></tr> <tr><td></td><td></td></tr> <tr><td></td><td></td></tr> </table> |  |  |  |  |  |  |
|           |                                                                                                   |                                                                                                                                                                    |  |  |  |  |  |  |
|           |                                                                                                   |                                                                                                                                                                    |  |  |  |  |  |  |
|           |                                                                                                   |                                                                                                                                                                    |  |  |  |  |  |  |
| <b>9</b>  | Participation on a Data Safety Monitoring Board or Advisory Board                                 | <input checked="" type="checkbox"/> <b>None</b><br><table border="1"> <tr><td></td><td></td></tr> <tr><td></td><td></td></tr> <tr><td></td><td></td></tr> </table> |  |  |  |  |  |  |
|           |                                                                                                   |                                                                                                                                                                    |  |  |  |  |  |  |
|           |                                                                                                   |                                                                                                                                                                    |  |  |  |  |  |  |
|           |                                                                                                   |                                                                                                                                                                    |  |  |  |  |  |  |
| <b>10</b> | Leadership or fiduciary role in other board, society, committee or advocacy group, paid or unpaid | <input checked="" type="checkbox"/> <b>None</b><br><table border="1"> <tr><td></td><td></td></tr> <tr><td></td><td></td></tr> <tr><td></td><td></td></tr> </table> |  |  |  |  |  |  |
|           |                                                                                                   |                                                                                                                                                                    |  |  |  |  |  |  |
|           |                                                                                                   |                                                                                                                                                                    |  |  |  |  |  |  |
|           |                                                                                                   |                                                                                                                                                                    |  |  |  |  |  |  |
| <b>11</b> | Stock or stock options                                                                            | <input checked="" type="checkbox"/> <b>None</b><br><table border="1"> <tr><td></td><td></td></tr> <tr><td></td><td></td></tr> <tr><td></td><td></td></tr> </table> |  |  |  |  |  |  |
|           |                                                                                                   |                                                                                                                                                                    |  |  |  |  |  |  |
|           |                                                                                                   |                                                                                                                                                                    |  |  |  |  |  |  |
|           |                                                                                                   |                                                                                                                                                                    |  |  |  |  |  |  |
| <b>12</b> | Receipt of equipment, materials, drugs, medical writing, gifts or other services                  | <input checked="" type="checkbox"/> <b>None</b><br><table border="1"> <tr><td></td><td></td></tr> <tr><td></td><td></td></tr> <tr><td></td><td></td></tr> </table> |  |  |  |  |  |  |
|           |                                                                                                   |                                                                                                                                                                    |  |  |  |  |  |  |
|           |                                                                                                   |                                                                                                                                                                    |  |  |  |  |  |  |
|           |                                                                                                   |                                                                                                                                                                    |  |  |  |  |  |  |
| <b>13</b> | Other financial or non-financial interests                                                        | <input checked="" type="checkbox"/> <b>None</b><br><table border="1"> <tr><td></td><td></td></tr> <tr><td></td><td></td></tr> <tr><td></td><td></td></tr> </table> |  |  |  |  |  |  |
|           |                                                                                                   |                                                                                                                                                                    |  |  |  |  |  |  |
|           |                                                                                                   |                                                                                                                                                                    |  |  |  |  |  |  |
|           |                                                                                                   |                                                                                                                                                                    |  |  |  |  |  |  |

**Please place an "X" next to the following statement to indicate your agreement:**

I certify that I have answered every question and have not altered the wording of any of the questions on this form.

## ICMJE DISCLOSURE FORM

**Date:** 9/15/2022

**Your Name:** Prof. Dr. Dr. h. c. Erhard Seifried

**Manuscript Title:** One-year follow-up of the CAPSID randomized trial for high-dose convalescent plasma in severe COVID-19 patients

**Manuscript Number (if known):** 163657-JCI-CMED-RV-2

In the interest of transparency, we ask you to disclose all relationships/activities/interests listed below that are related to the content of your manuscript. "Related" means any relation with for-profit or not-for-profit third parties whose interests may be affected by the content of the manuscript. Disclosure represents a commitment to transparency and does not necessarily indicate a bias. If you are in doubt about whether to list a relationship/activity/interest, it is preferable that you do so.

The author's relationships/activities/interests should be defined broadly. For example, if your manuscript pertains to the epidemiology of hypertension, you should declare all relationships with manufacturers of antihypertensive medication, even if that medication is not mentioned in the manuscript.

In item #1 below, report all support for the work reported in this manuscript without time limit. For all other items, the time frame for disclosure is the past 36 months.

|                                                                                                                                  | Name all entities with whom you have this relationship or indicate none (add rows as needed)                                                                                   | Specifications/Comments (e.g., if payments were made to you or to your institution)                                                                                                                                                                                                                                                                                                                                                                                                                                                                                                                                                                                                                     |                                                                                                                                  |                                                                                                                                                                            |  |             |  |                                                               |
|----------------------------------------------------------------------------------------------------------------------------------|--------------------------------------------------------------------------------------------------------------------------------------------------------------------------------|---------------------------------------------------------------------------------------------------------------------------------------------------------------------------------------------------------------------------------------------------------------------------------------------------------------------------------------------------------------------------------------------------------------------------------------------------------------------------------------------------------------------------------------------------------------------------------------------------------------------------------------------------------------------------------------------------------|----------------------------------------------------------------------------------------------------------------------------------|----------------------------------------------------------------------------------------------------------------------------------------------------------------------------|--|-------------|--|---------------------------------------------------------------|
| Time frame: Since the initial planning of the work                                                                               |                                                                                                                                                                                |                                                                                                                                                                                                                                                                                                                                                                                                                                                                                                                                                                                                                                                                                                         |                                                                                                                                  |                                                                                                                                                                            |  |             |  |                                                               |
| <b>1</b>                                                                                                                         | All support for the present manuscript (e.g., funding, provision of study materials, medical writing, article processing charges, etc.)<br><b>No time limit for this item.</b> | <input type="checkbox"/> <b>None</b><br><br><table border="1" style="width: 100%; border-collapse: collapse;"> <tr> <td style="width: 60%;">General funding started in 01.04.2020 and ended 31.05.2022<br/><b>German Federal Ministry of Health funded the clinical trial</b></td> <td style="width: 40%;">German Federal Ministry of Health funded the clinical trial. Expense reimbursement for patient treatment paid by the sponsor DRK Blutspendedienst Baden-Württemberg Hessen</td> </tr> <tr> <td></td> <td style="text-align: center;">3.555.082 €</td> </tr> <tr> <td></td> <td style="text-align: center;">(paid to participating institution [not to the investigator])</td> </tr> </table> | General funding started in 01.04.2020 and ended 31.05.2022<br><b>German Federal Ministry of Health funded the clinical trial</b> | German Federal Ministry of Health funded the clinical trial. Expense reimbursement for patient treatment paid by the sponsor DRK Blutspendedienst Baden-Württemberg Hessen |  | 3.555.082 € |  | (paid to participating institution [not to the investigator]) |
| General funding started in 01.04.2020 and ended 31.05.2022<br><b>German Federal Ministry of Health funded the clinical trial</b> | German Federal Ministry of Health funded the clinical trial. Expense reimbursement for patient treatment paid by the sponsor DRK Blutspendedienst Baden-Württemberg Hessen     |                                                                                                                                                                                                                                                                                                                                                                                                                                                                                                                                                                                                                                                                                                         |                                                                                                                                  |                                                                                                                                                                            |  |             |  |                                                               |
|                                                                                                                                  | 3.555.082 €                                                                                                                                                                    |                                                                                                                                                                                                                                                                                                                                                                                                                                                                                                                                                                                                                                                                                                         |                                                                                                                                  |                                                                                                                                                                            |  |             |  |                                                               |
|                                                                                                                                  | (paid to participating institution [not to the investigator])                                                                                                                  |                                                                                                                                                                                                                                                                                                                                                                                                                                                                                                                                                                                                                                                                                                         |                                                                                                                                  |                                                                                                                                                                            |  |             |  |                                                               |
| Time frame: past 36 months                                                                                                       |                                                                                                                                                                                |                                                                                                                                                                                                                                                                                                                                                                                                                                                                                                                                                                                                                                                                                                         |                                                                                                                                  |                                                                                                                                                                            |  |             |  |                                                               |
| <b>2</b>                                                                                                                         | Grants or contracts from any entity (if not indicated in item #1 above).                                                                                                       | <input checked="" type="checkbox"/> <b>None</b><br><br><table border="1" style="width: 100%; border-collapse: collapse;"> <tr><td style="width: 60%; height: 20px;"></td><td style="width: 40%;"></td></tr> <tr><td style="height: 20px;"></td><td></td></tr> <tr><td style="height: 20px;"></td><td></td></tr> </table>                                                                                                                                                                                                                                                                                                                                                                                |                                                                                                                                  |                                                                                                                                                                            |  |             |  |                                                               |
|                                                                                                                                  |                                                                                                                                                                                |                                                                                                                                                                                                                                                                                                                                                                                                                                                                                                                                                                                                                                                                                                         |                                                                                                                                  |                                                                                                                                                                            |  |             |  |                                                               |
|                                                                                                                                  |                                                                                                                                                                                |                                                                                                                                                                                                                                                                                                                                                                                                                                                                                                                                                                                                                                                                                                         |                                                                                                                                  |                                                                                                                                                                            |  |             |  |                                                               |
|                                                                                                                                  |                                                                                                                                                                                |                                                                                                                                                                                                                                                                                                                                                                                                                                                                                                                                                                                                                                                                                                         |                                                                                                                                  |                                                                                                                                                                            |  |             |  |                                                               |

|   | Name all entities with whom you have this relationship or indicate none (add rows as needed)                 | Specifications/Comments (e.g., if payments were made to you or to your institution)                                                                                                               |  |  |  |  |  |  |
|---|--------------------------------------------------------------------------------------------------------------|---------------------------------------------------------------------------------------------------------------------------------------------------------------------------------------------------|--|--|--|--|--|--|
| 3 | Royalties or licenses                                                                                        | <input checked="" type="checkbox"/> <b>None</b><br><table border="1" data-bbox="437 383 1538 488"> <tr><td></td><td></td></tr> <tr><td></td><td></td></tr> <tr><td></td><td></td></tr> </table>   |  |  |  |  |  |  |
|   |                                                                                                              |                                                                                                                                                                                                   |  |  |  |  |  |  |
|   |                                                                                                              |                                                                                                                                                                                                   |  |  |  |  |  |  |
|   |                                                                                                              |                                                                                                                                                                                                   |  |  |  |  |  |  |
| 4 | Consulting fees                                                                                              | <input checked="" type="checkbox"/> <b>None</b><br><table border="1" data-bbox="437 629 1538 734"> <tr><td></td><td></td></tr> <tr><td></td><td></td></tr> <tr><td></td><td></td></tr> </table>   |  |  |  |  |  |  |
|   |                                                                                                              |                                                                                                                                                                                                   |  |  |  |  |  |  |
|   |                                                                                                              |                                                                                                                                                                                                   |  |  |  |  |  |  |
|   |                                                                                                              |                                                                                                                                                                                                   |  |  |  |  |  |  |
| 5 | Payment or honoraria for lectures, presentations, speakers bureaus, manuscript writing or educational events | <input checked="" type="checkbox"/> <b>None</b><br><table border="1" data-bbox="437 853 1538 958"> <tr><td></td><td></td></tr> <tr><td></td><td></td></tr> <tr><td></td><td></td></tr> </table>   |  |  |  |  |  |  |
|   |                                                                                                              |                                                                                                                                                                                                   |  |  |  |  |  |  |
|   |                                                                                                              |                                                                                                                                                                                                   |  |  |  |  |  |  |
|   |                                                                                                              |                                                                                                                                                                                                   |  |  |  |  |  |  |
| 6 | Payment for expert testimony                                                                                 | <input checked="" type="checkbox"/> <b>None</b><br><table border="1" data-bbox="437 1200 1538 1305"> <tr><td></td><td></td></tr> <tr><td></td><td></td></tr> <tr><td></td><td></td></tr> </table> |  |  |  |  |  |  |
|   |                                                                                                              |                                                                                                                                                                                                   |  |  |  |  |  |  |
|   |                                                                                                              |                                                                                                                                                                                                   |  |  |  |  |  |  |
|   |                                                                                                              |                                                                                                                                                                                                   |  |  |  |  |  |  |
| 7 | Support for attending meetings and/or travel                                                                 | <input checked="" type="checkbox"/> <b>None</b><br><table border="1" data-bbox="437 1413 1538 1518"> <tr><td></td><td></td></tr> <tr><td></td><td></td></tr> <tr><td></td><td></td></tr> </table> |  |  |  |  |  |  |
|   |                                                                                                              |                                                                                                                                                                                                   |  |  |  |  |  |  |
|   |                                                                                                              |                                                                                                                                                                                                   |  |  |  |  |  |  |
|   |                                                                                                              |                                                                                                                                                                                                   |  |  |  |  |  |  |
| 8 | Patents planned, issued or pending                                                                           | <input checked="" type="checkbox"/> <b>None</b><br><table border="1" data-bbox="437 1637 1538 1742"> <tr><td></td><td></td></tr> <tr><td></td><td></td></tr> <tr><td></td><td></td></tr> </table> |  |  |  |  |  |  |
|   |                                                                                                              |                                                                                                                                                                                                   |  |  |  |  |  |  |
|   |                                                                                                              |                                                                                                                                                                                                   |  |  |  |  |  |  |
|   |                                                                                                              |                                                                                                                                                                                                   |  |  |  |  |  |  |
| 9 | Participation on a Data Safety Monitoring Board or Advisory Board                                            | <input checked="" type="checkbox"/> <b>None</b><br><table border="1" data-bbox="437 1861 1538 1966"> <tr><td></td><td></td></tr> <tr><td></td><td></td></tr> <tr><td></td><td></td></tr> </table> |  |  |  |  |  |  |
|   |                                                                                                              |                                                                                                                                                                                                   |  |  |  |  |  |  |
|   |                                                                                                              |                                                                                                                                                                                                   |  |  |  |  |  |  |
|   |                                                                                                              |                                                                                                                                                                                                   |  |  |  |  |  |  |

|        |                                                                                                   | Name all entities with whom you have this relationship or indicate none (add rows as needed) | Specifications/Comments (e.g., if payments were made to you or to your institution) |
|--------|---------------------------------------------------------------------------------------------------|----------------------------------------------------------------------------------------------|-------------------------------------------------------------------------------------|
| 1<br>0 | Leadership or fiduciary role in other board, society, committee or advocacy group, paid or unpaid | <input checked="" type="checkbox"/> None                                                     |                                                                                     |
|        |                                                                                                   |                                                                                              |                                                                                     |
|        |                                                                                                   |                                                                                              |                                                                                     |
| 1<br>1 | Stock or stock options                                                                            | <input checked="" type="checkbox"/> None                                                     |                                                                                     |
|        |                                                                                                   |                                                                                              |                                                                                     |
|        |                                                                                                   |                                                                                              |                                                                                     |
| 1<br>2 | Receipt of equipment, materials, drugs, medical writing, gifts or other services                  | <input checked="" type="checkbox"/> None                                                     |                                                                                     |
|        |                                                                                                   |                                                                                              |                                                                                     |
|        |                                                                                                   |                                                                                              |                                                                                     |
| 1<br>3 | Other financial or non-financial interests                                                        | <input checked="" type="checkbox"/> None                                                     |                                                                                     |
|        |                                                                                                   |                                                                                              |                                                                                     |
|        |                                                                                                   |                                                                                              |                                                                                     |

Please place an "X" next to the following statement to indicate your agreement:

I certify that I have answered every question and have not altered the wording of any of the questions on this form.

## ICMJE DISCLOSURE FORM

**Date:** 9/15/2022

**Your Name:** Dr. Sixten Körper

**Manuscript Title:** One-year follow-up of the CAPSID randomized trial for high-dose convalescent plasma in severe COVID-19 patients

**Manuscript Number (if known):** 163657-JCI-CMED-RV-2

In the interest of transparency, we ask you to disclose all relationships/activities/interests listed below that are related to the content of your manuscript. "Related" means any relation with for-profit or not-for-profit third parties whose interests may be affected by the content of the manuscript. Disclosure represents a commitment to transparency and does not necessarily indicate a bias. If you are in doubt about whether to list a relationship/activity/interest, it is preferable that you do so.

The author's relationships/activities/interests should be defined broadly. For example, if your manuscript pertains to the epidemiology of hypertension, you should declare all relationships with manufacturers of antihypertensive medication, even if that medication is not mentioned in the manuscript.

In item #1 below, report all support for the work reported in this manuscript without time limit. For all other items, the time frame for disclosure is the past 36 months.

|                                                                                                                                  |                                                                                                                                                                                | Name all entities with whom you have this relationship or indicate none (add rows as needed)                                                                                                                                                                                                                                                                                                                                                                                                                                                                                                                                                             | Specifications/Comments (e.g., if payments were made to you or to your institution)                                              |                                                                                                                                                                           |  |             |  |                                                               |  |
|----------------------------------------------------------------------------------------------------------------------------------|--------------------------------------------------------------------------------------------------------------------------------------------------------------------------------|----------------------------------------------------------------------------------------------------------------------------------------------------------------------------------------------------------------------------------------------------------------------------------------------------------------------------------------------------------------------------------------------------------------------------------------------------------------------------------------------------------------------------------------------------------------------------------------------------------------------------------------------------------|----------------------------------------------------------------------------------------------------------------------------------|---------------------------------------------------------------------------------------------------------------------------------------------------------------------------|--|-------------|--|---------------------------------------------------------------|--|
| Time frame: Since the initial planning of the work                                                                               |                                                                                                                                                                                |                                                                                                                                                                                                                                                                                                                                                                                                                                                                                                                                                                                                                                                          |                                                                                                                                  |                                                                                                                                                                           |  |             |  |                                                               |  |
| <b>1</b>                                                                                                                         | All support for the present manuscript (e.g., funding, provision of study materials, medical writing, article processing charges, etc.)<br><b>No time limit for this item.</b> | <input type="checkbox"/> None                                                                                                                                                                                                                                                                                                                                                                                                                                                                                                                                                                                                                            |                                                                                                                                  |                                                                                                                                                                           |  |             |  |                                                               |  |
|                                                                                                                                  |                                                                                                                                                                                | <table border="1" style="width: 100%; border-collapse: collapse;"> <tr> <td style="width: 60%;">General funding started in 01.04.2020 and ended 31.05.2022<br/><b>German Federal Ministry of Health funded the clinical trial</b></td> <td style="width: 40%;">German Federal Ministry of Health funded the clinical trial. Expense reimbursement for patient treatment paid by the sponsor DRK Blutspendedienst Baden-Württemberg Hesse</td> </tr> <tr> <td></td> <td style="text-align: right;">3.555.082 €</td> </tr> <tr> <td></td> <td style="text-align: right;">(paid to participating institution [not to the investigator])</td> </tr> </table> | General funding started in 01.04.2020 and ended 31.05.2022<br><b>German Federal Ministry of Health funded the clinical trial</b> | German Federal Ministry of Health funded the clinical trial. Expense reimbursement for patient treatment paid by the sponsor DRK Blutspendedienst Baden-Württemberg Hesse |  | 3.555.082 € |  | (paid to participating institution [not to the investigator]) |  |
| General funding started in 01.04.2020 and ended 31.05.2022<br><b>German Federal Ministry of Health funded the clinical trial</b> | German Federal Ministry of Health funded the clinical trial. Expense reimbursement for patient treatment paid by the sponsor DRK Blutspendedienst Baden-Württemberg Hesse      |                                                                                                                                                                                                                                                                                                                                                                                                                                                                                                                                                                                                                                                          |                                                                                                                                  |                                                                                                                                                                           |  |             |  |                                                               |  |
|                                                                                                                                  | 3.555.082 €                                                                                                                                                                    |                                                                                                                                                                                                                                                                                                                                                                                                                                                                                                                                                                                                                                                          |                                                                                                                                  |                                                                                                                                                                           |  |             |  |                                                               |  |
|                                                                                                                                  | (paid to participating institution [not to the investigator])                                                                                                                  |                                                                                                                                                                                                                                                                                                                                                                                                                                                                                                                                                                                                                                                          |                                                                                                                                  |                                                                                                                                                                           |  |             |  |                                                               |  |
| Time frame: past 36 months                                                                                                       |                                                                                                                                                                                |                                                                                                                                                                                                                                                                                                                                                                                                                                                                                                                                                                                                                                                          |                                                                                                                                  |                                                                                                                                                                           |  |             |  |                                                               |  |
| <b>2</b>                                                                                                                         | Grants or contracts from any entity (if not indicated in item #1 above).                                                                                                       | <input checked="" type="checkbox"/> None                                                                                                                                                                                                                                                                                                                                                                                                                                                                                                                                                                                                                 |                                                                                                                                  |                                                                                                                                                                           |  |             |  |                                                               |  |
|                                                                                                                                  |                                                                                                                                                                                |                                                                                                                                                                                                                                                                                                                                                                                                                                                                                                                                                                                                                                                          |                                                                                                                                  |                                                                                                                                                                           |  |             |  |                                                               |  |
|                                                                                                                                  |                                                                                                                                                                                |                                                                                                                                                                                                                                                                                                                                                                                                                                                                                                                                                                                                                                                          |                                                                                                                                  |                                                                                                                                                                           |  |             |  |                                                               |  |

|          | Name all entities with whom you have this relationship or indicate none (add rows as needed)                 | Specifications/Comments (e.g., if payments were made to you or to your institution)                                                                                                                     |  |  |  |  |  |  |
|----------|--------------------------------------------------------------------------------------------------------------|---------------------------------------------------------------------------------------------------------------------------------------------------------------------------------------------------------|--|--|--|--|--|--|
| <b>3</b> | Royalties or licenses                                                                                        | <input checked="" type="checkbox"/> <b>None</b><br><table border="1" data-bbox="437 383 1011 488"> <tr><td> </td><td> </td></tr> <tr><td> </td><td> </td></tr> <tr><td> </td><td> </td></tr> </table>   |  |  |  |  |  |  |
|          |                                                                                                              |                                                                                                                                                                                                         |  |  |  |  |  |  |
|          |                                                                                                              |                                                                                                                                                                                                         |  |  |  |  |  |  |
|          |                                                                                                              |                                                                                                                                                                                                         |  |  |  |  |  |  |
| <b>4</b> | Consulting fees                                                                                              | <input checked="" type="checkbox"/> <b>None</b><br><table border="1" data-bbox="437 629 1011 734"> <tr><td> </td><td> </td></tr> <tr><td> </td><td> </td></tr> <tr><td> </td><td> </td></tr> </table>   |  |  |  |  |  |  |
|          |                                                                                                              |                                                                                                                                                                                                         |  |  |  |  |  |  |
|          |                                                                                                              |                                                                                                                                                                                                         |  |  |  |  |  |  |
|          |                                                                                                              |                                                                                                                                                                                                         |  |  |  |  |  |  |
| <b>5</b> | Payment or honoraria for lectures, presentations, speakers bureaus, manuscript writing or educational events | <input checked="" type="checkbox"/> <b>None</b><br><table border="1" data-bbox="437 853 1011 958"> <tr><td> </td><td> </td></tr> <tr><td> </td><td> </td></tr> <tr><td> </td><td> </td></tr> </table>   |  |  |  |  |  |  |
|          |                                                                                                              |                                                                                                                                                                                                         |  |  |  |  |  |  |
|          |                                                                                                              |                                                                                                                                                                                                         |  |  |  |  |  |  |
|          |                                                                                                              |                                                                                                                                                                                                         |  |  |  |  |  |  |
| <b>6</b> | Payment for expert testimony                                                                                 | <input checked="" type="checkbox"/> <b>None</b><br><table border="1" data-bbox="437 1200 1011 1305"> <tr><td> </td><td> </td></tr> <tr><td> </td><td> </td></tr> <tr><td> </td><td> </td></tr> </table> |  |  |  |  |  |  |
|          |                                                                                                              |                                                                                                                                                                                                         |  |  |  |  |  |  |
|          |                                                                                                              |                                                                                                                                                                                                         |  |  |  |  |  |  |
|          |                                                                                                              |                                                                                                                                                                                                         |  |  |  |  |  |  |
| <b>7</b> | Support for attending meetings and/or travel                                                                 | <input checked="" type="checkbox"/> <b>None</b><br><table border="1" data-bbox="437 1413 1011 1518"> <tr><td> </td><td> </td></tr> <tr><td> </td><td> </td></tr> <tr><td> </td><td> </td></tr> </table> |  |  |  |  |  |  |
|          |                                                                                                              |                                                                                                                                                                                                         |  |  |  |  |  |  |
|          |                                                                                                              |                                                                                                                                                                                                         |  |  |  |  |  |  |
|          |                                                                                                              |                                                                                                                                                                                                         |  |  |  |  |  |  |
| <b>8</b> | Patents planned, issued or pending                                                                           | <input checked="" type="checkbox"/> <b>None</b><br><table border="1" data-bbox="437 1637 1011 1742"> <tr><td> </td><td> </td></tr> <tr><td> </td><td> </td></tr> <tr><td> </td><td> </td></tr> </table> |  |  |  |  |  |  |
|          |                                                                                                              |                                                                                                                                                                                                         |  |  |  |  |  |  |
|          |                                                                                                              |                                                                                                                                                                                                         |  |  |  |  |  |  |
|          |                                                                                                              |                                                                                                                                                                                                         |  |  |  |  |  |  |
| <b>9</b> | Participation on a Data Safety Monitoring Board or Advisory Board                                            | <input checked="" type="checkbox"/> <b>None</b><br><table border="1" data-bbox="437 1861 1011 1966"> <tr><td> </td><td> </td></tr> <tr><td> </td><td> </td></tr> <tr><td> </td><td> </td></tr> </table> |  |  |  |  |  |  |
|          |                                                                                                              |                                                                                                                                                                                                         |  |  |  |  |  |  |
|          |                                                                                                              |                                                                                                                                                                                                         |  |  |  |  |  |  |
|          |                                                                                                              |                                                                                                                                                                                                         |  |  |  |  |  |  |



|    |                                                                                                   | Name all entities with whom you have this relationship or indicate none (add rows as needed)                                                     | Specifications/Comments (e.g., if payments were made to you or to your institution) |
|----|---------------------------------------------------------------------------------------------------|--------------------------------------------------------------------------------------------------------------------------------------------------|-------------------------------------------------------------------------------------|
| 10 | Leadership or fiduciary role in other board, society, committee or advocacy group, paid or unpaid | <input type="checkbox"/> None                                                                                                                    |                                                                                     |
|    |                                                                                                   | Co-Chair to the Working party on Preparative and Therapeutic Apheresis of the DGTI (German Society of Transfusion Medicine and Immunohematology) | unpaid                                                                              |
|    |                                                                                                   |                                                                                                                                                  |                                                                                     |
|    |                                                                                                   |                                                                                                                                                  |                                                                                     |
| 11 | Stock or stock options                                                                            | <input checked="" type="checkbox"/> None                                                                                                         |                                                                                     |
|    |                                                                                                   |                                                                                                                                                  |                                                                                     |
|    |                                                                                                   |                                                                                                                                                  |                                                                                     |
|    |                                                                                                   |                                                                                                                                                  |                                                                                     |
| 12 | Receipt of equipment, materials, drugs, medical writing, gifts or other services                  | <input checked="" type="checkbox"/> None                                                                                                         |                                                                                     |
|    |                                                                                                   |                                                                                                                                                  |                                                                                     |
|    |                                                                                                   |                                                                                                                                                  |                                                                                     |
|    |                                                                                                   |                                                                                                                                                  |                                                                                     |
| 13 | Other financial or non-financial interests                                                        | <input checked="" type="checkbox"/> None                                                                                                         |                                                                                     |
|    |                                                                                                   |                                                                                                                                                  |                                                                                     |
|    |                                                                                                   |                                                                                                                                                  |                                                                                     |
|    |                                                                                                   |                                                                                                                                                  |                                                                                     |

Please place an "X" next to the following statement to indicate your agreement:

I certify that I have answered every question and have not altered the wording of any of the questions on this form.

## ICMJE DISCLOSURE FORM

**Date:** 9/15/2022

**Your Name:** Dr. Thomas Appl

**Manuscript Title:** One-year follow-up of the CAPSID randomized trial for high-dose convalescent plasma in severe COVID-19 patients

**Manuscript Number (if known):** 163657-JCI-CMED-RV-2

In the interest of transparency, we ask you to disclose all relationships/activities/interests listed below that are related to the content of your manuscript. "Related" means any relation with for-profit or not-for-profit third parties whose interests may be affected by the content of the manuscript. Disclosure represents a commitment to transparency and does not necessarily indicate a bias. If you are in doubt about whether to list a relationship/activity/interest, it is preferable that you do so.

The author's relationships/activities/interests should be defined broadly. For example, if your manuscript pertains to the epidemiology of hypertension, you should declare all relationships with manufacturers of antihypertensive medication, even if that medication is not mentioned in the manuscript.

In item #1 below, report all support for the work reported in this manuscript without time limit. For all other items, the time frame for disclosure is the past 36 months.

|                                                                                                                                                                                         | Name all entities with whom you have this relationship or indicate none (add rows as needed)                                                                 | Specifications/Comments (e.g., if payments were made to you or to your institution)                                                                                                                                                                                                                                                                                                                                                                                                                                                                                                                                                         |                                                                                                                                  |                                                                                                                                                              |  |             |  |                                                               |
|-----------------------------------------------------------------------------------------------------------------------------------------------------------------------------------------|--------------------------------------------------------------------------------------------------------------------------------------------------------------|---------------------------------------------------------------------------------------------------------------------------------------------------------------------------------------------------------------------------------------------------------------------------------------------------------------------------------------------------------------------------------------------------------------------------------------------------------------------------------------------------------------------------------------------------------------------------------------------------------------------------------------------|----------------------------------------------------------------------------------------------------------------------------------|--------------------------------------------------------------------------------------------------------------------------------------------------------------|--|-------------|--|---------------------------------------------------------------|
| Time frame: Since the initial planning of the work                                                                                                                                      |                                                                                                                                                              |                                                                                                                                                                                                                                                                                                                                                                                                                                                                                                                                                                                                                                             |                                                                                                                                  |                                                                                                                                                              |  |             |  |                                                               |
| <b>1</b> All support for the present manuscript (e.g., funding, provision of study materials, medical writing, article processing charges, etc.)<br><b>No time limit for this item.</b> | <input type="checkbox"/> <b>None</b>                                                                                                                         | <table border="1" style="width: 100%; border-collapse: collapse;"> <tr> <td style="width: 60%;">General funding started in 01.04.2020 and ended 31.05.2022<br/><b>German Federal Ministry of Health funded the clinical trial</b></td> <td style="width: 40%;">German Federal Ministry of Health funded clinical trial. Expense reimbursement for d treatment paid by the sponsor DRK Blutspendedienst Baden-Württemberg He</td> </tr> <tr> <td></td> <td style="text-align: right;">3.555.082 €</td> </tr> <tr> <td></td> <td style="text-align: right;">(paid to participating institution [not to the investigator])</td> </tr> </table> | General funding started in 01.04.2020 and ended 31.05.2022<br><b>German Federal Ministry of Health funded the clinical trial</b> | German Federal Ministry of Health funded clinical trial. Expense reimbursement for d treatment paid by the sponsor DRK Blutspendedienst Baden-Württemberg He |  | 3.555.082 € |  | (paid to participating institution [not to the investigator]) |
| General funding started in 01.04.2020 and ended 31.05.2022<br><b>German Federal Ministry of Health funded the clinical trial</b>                                                        | German Federal Ministry of Health funded clinical trial. Expense reimbursement for d treatment paid by the sponsor DRK Blutspendedienst Baden-Württemberg He |                                                                                                                                                                                                                                                                                                                                                                                                                                                                                                                                                                                                                                             |                                                                                                                                  |                                                                                                                                                              |  |             |  |                                                               |
|                                                                                                                                                                                         | 3.555.082 €                                                                                                                                                  |                                                                                                                                                                                                                                                                                                                                                                                                                                                                                                                                                                                                                                             |                                                                                                                                  |                                                                                                                                                              |  |             |  |                                                               |
|                                                                                                                                                                                         | (paid to participating institution [not to the investigator])                                                                                                |                                                                                                                                                                                                                                                                                                                                                                                                                                                                                                                                                                                                                                             |                                                                                                                                  |                                                                                                                                                              |  |             |  |                                                               |
| Time frame: past 36 months                                                                                                                                                              |                                                                                                                                                              |                                                                                                                                                                                                                                                                                                                                                                                                                                                                                                                                                                                                                                             |                                                                                                                                  |                                                                                                                                                              |  |             |  |                                                               |
| <b>2</b> Grants or contracts from any entity (if not indicated in item #1 above).                                                                                                       | <input checked="" type="checkbox"/> <b>None</b>                                                                                                              | <table border="1" style="width: 100%; border-collapse: collapse;"> <tr><td style="height: 20px;"> </td><td> </td></tr> <tr><td style="height: 20px;"> </td><td> </td></tr> <tr><td style="height: 20px;"> </td><td> </td></tr> </table>                                                                                                                                                                                                                                                                                                                                                                                                     |                                                                                                                                  |                                                                                                                                                              |  |             |  |                                                               |
|                                                                                                                                                                                         |                                                                                                                                                              |                                                                                                                                                                                                                                                                                                                                                                                                                                                                                                                                                                                                                                             |                                                                                                                                  |                                                                                                                                                              |  |             |  |                                                               |
|                                                                                                                                                                                         |                                                                                                                                                              |                                                                                                                                                                                                                                                                                                                                                                                                                                                                                                                                                                                                                                             |                                                                                                                                  |                                                                                                                                                              |  |             |  |                                                               |
|                                                                                                                                                                                         |                                                                                                                                                              |                                                                                                                                                                                                                                                                                                                                                                                                                                                                                                                                                                                                                                             |                                                                                                                                  |                                                                                                                                                              |  |             |  |                                                               |

|          | Name all entities with whom you have this relationship or indicate none (add rows as needed)                 | Specifications/Comments (e.g., if payments were made to you or to your institution)                                                                                                               |  |  |  |  |  |  |
|----------|--------------------------------------------------------------------------------------------------------------|---------------------------------------------------------------------------------------------------------------------------------------------------------------------------------------------------|--|--|--|--|--|--|
| <b>3</b> | Royalties or licenses                                                                                        | <input checked="" type="checkbox"/> <b>None</b><br><table border="1" data-bbox="437 383 1013 488"> <tr><td></td><td></td></tr> <tr><td></td><td></td></tr> <tr><td></td><td></td></tr> </table>   |  |  |  |  |  |  |
|          |                                                                                                              |                                                                                                                                                                                                   |  |  |  |  |  |  |
|          |                                                                                                              |                                                                                                                                                                                                   |  |  |  |  |  |  |
|          |                                                                                                              |                                                                                                                                                                                                   |  |  |  |  |  |  |
| <b>4</b> | Consulting fees                                                                                              | <input checked="" type="checkbox"/> <b>None</b><br><table border="1" data-bbox="437 629 1013 734"> <tr><td></td><td></td></tr> <tr><td></td><td></td></tr> <tr><td></td><td></td></tr> </table>   |  |  |  |  |  |  |
|          |                                                                                                              |                                                                                                                                                                                                   |  |  |  |  |  |  |
|          |                                                                                                              |                                                                                                                                                                                                   |  |  |  |  |  |  |
|          |                                                                                                              |                                                                                                                                                                                                   |  |  |  |  |  |  |
| <b>5</b> | Payment or honoraria for lectures, presentations, speakers bureaus, manuscript writing or educational events | <input checked="" type="checkbox"/> <b>None</b><br><table border="1" data-bbox="437 853 1013 958"> <tr><td></td><td></td></tr> <tr><td></td><td></td></tr> <tr><td></td><td></td></tr> </table>   |  |  |  |  |  |  |
|          |                                                                                                              |                                                                                                                                                                                                   |  |  |  |  |  |  |
|          |                                                                                                              |                                                                                                                                                                                                   |  |  |  |  |  |  |
|          |                                                                                                              |                                                                                                                                                                                                   |  |  |  |  |  |  |
| <b>6</b> | Payment for expert testimony                                                                                 | <input checked="" type="checkbox"/> <b>None</b><br><table border="1" data-bbox="437 1200 1013 1305"> <tr><td></td><td></td></tr> <tr><td></td><td></td></tr> <tr><td></td><td></td></tr> </table> |  |  |  |  |  |  |
|          |                                                                                                              |                                                                                                                                                                                                   |  |  |  |  |  |  |
|          |                                                                                                              |                                                                                                                                                                                                   |  |  |  |  |  |  |
|          |                                                                                                              |                                                                                                                                                                                                   |  |  |  |  |  |  |
| <b>7</b> | Support for attending meetings and/or travel                                                                 | <input checked="" type="checkbox"/> <b>None</b><br><table border="1" data-bbox="437 1413 1013 1518"> <tr><td></td><td></td></tr> <tr><td></td><td></td></tr> <tr><td></td><td></td></tr> </table> |  |  |  |  |  |  |
|          |                                                                                                              |                                                                                                                                                                                                   |  |  |  |  |  |  |
|          |                                                                                                              |                                                                                                                                                                                                   |  |  |  |  |  |  |
|          |                                                                                                              |                                                                                                                                                                                                   |  |  |  |  |  |  |
| <b>8</b> | Patents planned, issued or pending                                                                           | <input checked="" type="checkbox"/> <b>None</b><br><table border="1" data-bbox="437 1637 1013 1742"> <tr><td></td><td></td></tr> <tr><td></td><td></td></tr> <tr><td></td><td></td></tr> </table> |  |  |  |  |  |  |
|          |                                                                                                              |                                                                                                                                                                                                   |  |  |  |  |  |  |
|          |                                                                                                              |                                                                                                                                                                                                   |  |  |  |  |  |  |
|          |                                                                                                              |                                                                                                                                                                                                   |  |  |  |  |  |  |
| <b>9</b> | Participation on a Data Safety Monitoring Board or Advisory Board                                            | <input checked="" type="checkbox"/> <b>None</b><br><table border="1" data-bbox="437 1850 1013 1955"> <tr><td></td><td></td></tr> <tr><td></td><td></td></tr> <tr><td></td><td></td></tr> </table> |  |  |  |  |  |  |
|          |                                                                                                              |                                                                                                                                                                                                   |  |  |  |  |  |  |
|          |                                                                                                              |                                                                                                                                                                                                   |  |  |  |  |  |  |
|          |                                                                                                              |                                                                                                                                                                                                   |  |  |  |  |  |  |

|                                                                                                                                                                                                                                                               |                                                                                                   | Name all entities with whom you have this relationship or indicate none (add rows as needed) | Specifications/Comments (e.g., if payments were made to you or to your institution) |
|---------------------------------------------------------------------------------------------------------------------------------------------------------------------------------------------------------------------------------------------------------------|---------------------------------------------------------------------------------------------------|----------------------------------------------------------------------------------------------|-------------------------------------------------------------------------------------|
| <b>10</b>                                                                                                                                                                                                                                                     | Leadership or fiduciary role in other board, society, committee or advocacy group, paid or unpaid | <input checked="" type="checkbox"/> <b>None</b>                                              |                                                                                     |
|                                                                                                                                                                                                                                                               |                                                                                                   |                                                                                              |                                                                                     |
|                                                                                                                                                                                                                                                               |                                                                                                   |                                                                                              |                                                                                     |
| <b>11</b>                                                                                                                                                                                                                                                     | Stock or stock options                                                                            | <input checked="" type="checkbox"/> <b>None</b>                                              |                                                                                     |
|                                                                                                                                                                                                                                                               |                                                                                                   |                                                                                              |                                                                                     |
|                                                                                                                                                                                                                                                               |                                                                                                   |                                                                                              |                                                                                     |
| <b>12</b>                                                                                                                                                                                                                                                     | Receipt of equipment, materials, drugs, medical writing, gifts or other services                  | <input checked="" type="checkbox"/> <b>None</b>                                              |                                                                                     |
|                                                                                                                                                                                                                                                               |                                                                                                   |                                                                                              |                                                                                     |
|                                                                                                                                                                                                                                                               |                                                                                                   |                                                                                              |                                                                                     |
| <b>13</b>                                                                                                                                                                                                                                                     | Other financial or non-financial interests                                                        | <input checked="" type="checkbox"/> <b>None</b>                                              |                                                                                     |
|                                                                                                                                                                                                                                                               |                                                                                                   |                                                                                              |                                                                                     |
|                                                                                                                                                                                                                                                               |                                                                                                   |                                                                                              |                                                                                     |
| <p><b>Please place an "X" next to the following statement to indicate your agreement:</b></p> <p><input checked="" type="checkbox"/> I certify that I have answered every question and have not altered the wording of any of the questions on this form.</p> |                                                                                                   |                                                                                              |                                                                                     |

## ICMJE DISCLOSURE FORM

**Date:** 9/15/2022

**Your Name:** Prof. Dr. Dr. Matthias Dollinger

**Manuscript Title:** One-year follow-up of the CAPSID randomized trial for high-dose convalescent plasma in severe COVID-19 patients

**Manuscript Number (if known):** 163657-JCI-CMED-RV-2

In the interest of transparency, we ask you to disclose all relationships/activities/interests listed below that are related to the content of your manuscript. "Related" means any relation with for-profit or not-for-profit third parties whose interests may be affected by the content of the manuscript. Disclosure represents a commitment to transparency and does not necessarily indicate a bias. If you are in doubt about whether to list a relationship/activity/interest, it is preferable that you do so.

The author's relationships/activities/interests should be defined broadly. For example, if your manuscript pertains to the epidemiology of hypertension, you should declare all relationships with manufacturers of antihypertensive medication, even if that medication is not mentioned in the manuscript.

In item #1 below, report all support for the work reported in this manuscript without time limit. For all other items, the time frame for disclosure is the past 36 months.

|                                                                                                                                  | Name all entities with whom you have this relationship or indicate none (add rows as needed)                                                                                   | Specifications/Comments (e.g., if payments were made to you or to your institution)                                                                                                                                                                                                                                                                                                                                                                                                                                                                                                                                                                                                                                                                                                                                                                        |                                                                                                                                  |                                                                                                                                                                                |                                   |                                                                                                                      |  |                                                 |  |                                                                 |
|----------------------------------------------------------------------------------------------------------------------------------|--------------------------------------------------------------------------------------------------------------------------------------------------------------------------------|------------------------------------------------------------------------------------------------------------------------------------------------------------------------------------------------------------------------------------------------------------------------------------------------------------------------------------------------------------------------------------------------------------------------------------------------------------------------------------------------------------------------------------------------------------------------------------------------------------------------------------------------------------------------------------------------------------------------------------------------------------------------------------------------------------------------------------------------------------|----------------------------------------------------------------------------------------------------------------------------------|--------------------------------------------------------------------------------------------------------------------------------------------------------------------------------|-----------------------------------|----------------------------------------------------------------------------------------------------------------------|--|-------------------------------------------------|--|-----------------------------------------------------------------|
| Time frame: Since the initial planning of the work                                                                               |                                                                                                                                                                                |                                                                                                                                                                                                                                                                                                                                                                                                                                                                                                                                                                                                                                                                                                                                                                                                                                                            |                                                                                                                                  |                                                                                                                                                                                |                                   |                                                                                                                      |  |                                                 |  |                                                                 |
| <b>1</b>                                                                                                                         | All support for the present manuscript (e.g., funding, provision of study materials, medical writing, article processing charges, etc.)<br><b>No time limit for this item.</b> | <input type="checkbox"/> <b>None</b><br><table border="1" style="width: 100%; border-collapse: collapse; margin-top: 5px;"> <tr> <td style="width: 60%;">General funding started in 01.04.2020 and ended 31.05.2022<br/><b>German Federal Ministry of Health funded the clinical trial</b></td> <td style="width: 40%;"><b>German Federal Ministry of Health funded the clinical trial. Expense reimbursement for donor treatment paid by the sponsor DRK Blutspendedienst Baden-Württemberg Hesse</b></td> </tr> <tr> <td></td> <td>up to 4400 € per patient treated within the first part of the trial<br/>2000 € set up fee for initiation of the trial</td> </tr> <tr> <td></td> <td>up to 885 € per patient in the follow up period</td> </tr> <tr> <td></td> <td>All paid to participating institution [not to the investigator]</td> </tr> </table> | General funding started in 01.04.2020 and ended 31.05.2022<br><b>German Federal Ministry of Health funded the clinical trial</b> | <b>German Federal Ministry of Health funded the clinical trial. Expense reimbursement for donor treatment paid by the sponsor DRK Blutspendedienst Baden-Württemberg Hesse</b> |                                   | up to 4400 € per patient treated within the first part of the trial<br>2000 € set up fee for initiation of the trial |  | up to 885 € per patient in the follow up period |  | All paid to participating institution [not to the investigator] |
| General funding started in 01.04.2020 and ended 31.05.2022<br><b>German Federal Ministry of Health funded the clinical trial</b> | <b>German Federal Ministry of Health funded the clinical trial. Expense reimbursement for donor treatment paid by the sponsor DRK Blutspendedienst Baden-Württemberg Hesse</b> |                                                                                                                                                                                                                                                                                                                                                                                                                                                                                                                                                                                                                                                                                                                                                                                                                                                            |                                                                                                                                  |                                                                                                                                                                                |                                   |                                                                                                                      |  |                                                 |  |                                                                 |
|                                                                                                                                  | up to 4400 € per patient treated within the first part of the trial<br>2000 € set up fee for initiation of the trial                                                           |                                                                                                                                                                                                                                                                                                                                                                                                                                                                                                                                                                                                                                                                                                                                                                                                                                                            |                                                                                                                                  |                                                                                                                                                                                |                                   |                                                                                                                      |  |                                                 |  |                                                                 |
|                                                                                                                                  | up to 885 € per patient in the follow up period                                                                                                                                |                                                                                                                                                                                                                                                                                                                                                                                                                                                                                                                                                                                                                                                                                                                                                                                                                                                            |                                                                                                                                  |                                                                                                                                                                                |                                   |                                                                                                                      |  |                                                 |  |                                                                 |
|                                                                                                                                  | All paid to participating institution [not to the investigator]                                                                                                                |                                                                                                                                                                                                                                                                                                                                                                                                                                                                                                                                                                                                                                                                                                                                                                                                                                                            |                                                                                                                                  |                                                                                                                                                                                |                                   |                                                                                                                      |  |                                                 |  |                                                                 |
| Time frame: past 36 months                                                                                                       |                                                                                                                                                                                |                                                                                                                                                                                                                                                                                                                                                                                                                                                                                                                                                                                                                                                                                                                                                                                                                                                            |                                                                                                                                  |                                                                                                                                                                                |                                   |                                                                                                                      |  |                                                 |  |                                                                 |
| <b>2</b>                                                                                                                         | Grants or contracts from any entity (if not indicated in item #1 above).                                                                                                       | <input type="checkbox"/> <b>None</b><br><table border="1" style="width: 100%; border-collapse: collapse; margin-top: 5px;"> <tr> <td style="width: 60%;">EU Horizon 2020</td> <td style="width: 40%;">Payments to Institution</td> </tr> <tr> <td>German Federal Ministry of Health</td> <td>Payments to Institution</td> </tr> <tr> <td></td> <td></td> </tr> </table>                                                                                                                                                                                                                                                                                                                                                                                                                                                                                    | EU Horizon 2020                                                                                                                  | Payments to Institution                                                                                                                                                        | German Federal Ministry of Health | Payments to Institution                                                                                              |  |                                                 |  |                                                                 |
| EU Horizon 2020                                                                                                                  | Payments to Institution                                                                                                                                                        |                                                                                                                                                                                                                                                                                                                                                                                                                                                                                                                                                                                                                                                                                                                                                                                                                                                            |                                                                                                                                  |                                                                                                                                                                                |                                   |                                                                                                                      |  |                                                 |  |                                                                 |
| German Federal Ministry of Health                                                                                                | Payments to Institution                                                                                                                                                        |                                                                                                                                                                                                                                                                                                                                                                                                                                                                                                                                                                                                                                                                                                                                                                                                                                                            |                                                                                                                                  |                                                                                                                                                                                |                                   |                                                                                                                      |  |                                                 |  |                                                                 |
|                                                                                                                                  |                                                                                                                                                                                |                                                                                                                                                                                                                                                                                                                                                                                                                                                                                                                                                                                                                                                                                                                                                                                                                                                            |                                                                                                                                  |                                                                                                                                                                                |                                   |                                                                                                                      |  |                                                 |  |                                                                 |

|          | Name all entities with whom you have this relationship or indicate none (add rows as needed)                 | Specifications/Comments (e.g., if payments were made to you or to your institution)                                                                                                                                                               |        |                |        |                |         |                |
|----------|--------------------------------------------------------------------------------------------------------------|---------------------------------------------------------------------------------------------------------------------------------------------------------------------------------------------------------------------------------------------------|--------|----------------|--------|----------------|---------|----------------|
| <b>3</b> | Royalties or licenses                                                                                        | <input checked="" type="checkbox"/> <b>None</b><br><table border="1" data-bbox="437 383 1509 488"> <tr><td></td><td></td></tr> <tr><td></td><td></td></tr> <tr><td></td><td></td></tr> </table>                                                   |        |                |        |                |         |                |
|          |                                                                                                              |                                                                                                                                                                                                                                                   |        |                |        |                |         |                |
|          |                                                                                                              |                                                                                                                                                                                                                                                   |        |                |        |                |         |                |
|          |                                                                                                              |                                                                                                                                                                                                                                                   |        |                |        |                |         |                |
| <b>4</b> | Consulting fees                                                                                              | <input checked="" type="checkbox"/> <b>None</b><br><table border="1" data-bbox="437 629 1509 734"> <tr><td></td><td></td></tr> <tr><td></td><td></td></tr> <tr><td></td><td></td></tr> </table>                                                   |        |                |        |                |         |                |
|          |                                                                                                              |                                                                                                                                                                                                                                                   |        |                |        |                |         |                |
|          |                                                                                                              |                                                                                                                                                                                                                                                   |        |                |        |                |         |                |
|          |                                                                                                              |                                                                                                                                                                                                                                                   |        |                |        |                |         |                |
| <b>5</b> | Payment or honoraria for lectures, presentations, speakers bureaus, manuscript writing or educational events | <input type="checkbox"/> <b>None</b><br><table border="1" data-bbox="437 853 1509 958"> <tr><td>Falk</td><td>Lectures</td></tr> <tr><td>Takeda</td><td>Lectures</td></tr> <tr><td>Sanofi</td><td>Lectures</td></tr> </table>                      | Falk   | Lectures       | Takeda | Lectures       | Sanofi  | Lectures       |
| Falk     | Lectures                                                                                                     |                                                                                                                                                                                                                                                   |        |                |        |                |         |                |
| Takeda   | Lectures                                                                                                     |                                                                                                                                                                                                                                                   |        |                |        |                |         |                |
| Sanofi   | Lectures                                                                                                     |                                                                                                                                                                                                                                                   |        |                |        |                |         |                |
| <b>6</b> | Payment for expert testimony                                                                                 | <input checked="" type="checkbox"/> <b>None</b><br><table border="1" data-bbox="437 1200 1509 1305"> <tr><td></td><td></td></tr> <tr><td></td><td></td></tr> <tr><td></td><td></td></tr> </table>                                                 |        |                |        |                |         |                |
|          |                                                                                                              |                                                                                                                                                                                                                                                   |        |                |        |                |         |                |
|          |                                                                                                              |                                                                                                                                                                                                                                                   |        |                |        |                |         |                |
|          |                                                                                                              |                                                                                                                                                                                                                                                   |        |                |        |                |         |                |
| <b>7</b> | Support for attending meetings and/or travel                                                                 | <input checked="" type="checkbox"/> <b>None</b><br><table border="1" data-bbox="437 1413 1509 1518"> <tr><td></td><td></td></tr> <tr><td></td><td></td></tr> <tr><td></td><td></td></tr> </table>                                                 |        |                |        |                |         |                |
|          |                                                                                                              |                                                                                                                                                                                                                                                   |        |                |        |                |         |                |
|          |                                                                                                              |                                                                                                                                                                                                                                                   |        |                |        |                |         |                |
|          |                                                                                                              |                                                                                                                                                                                                                                                   |        |                |        |                |         |                |
| <b>8</b> | Patents planned, issued or pending                                                                           | <input checked="" type="checkbox"/> <b>None</b><br><table border="1" data-bbox="437 1637 1509 1742"> <tr><td></td><td></td></tr> <tr><td></td><td></td></tr> <tr><td></td><td></td></tr> </table>                                                 |        |                |        |                |         |                |
|          |                                                                                                              |                                                                                                                                                                                                                                                   |        |                |        |                |         |                |
|          |                                                                                                              |                                                                                                                                                                                                                                                   |        |                |        |                |         |                |
|          |                                                                                                              |                                                                                                                                                                                                                                                   |        |                |        |                |         |                |
| <b>9</b> | Participation on a Data Safety Monitoring Board or Advisory Board                                            | <input type="checkbox"/> <b>None</b><br><table border="1" data-bbox="437 1850 1509 1955"> <tr><td>Takeda</td><td>Advisory Board</td></tr> <tr><td>Sobi</td><td>Advisory Board</td></tr> <tr><td>Alexion</td><td>Advisory Board</td></tr> </table> | Takeda | Advisory Board | Sobi   | Advisory Board | Alexion | Advisory Board |
| Takeda   | Advisory Board                                                                                               |                                                                                                                                                                                                                                                   |        |                |        |                |         |                |
| Sobi     | Advisory Board                                                                                               |                                                                                                                                                                                                                                                   |        |                |        |                |         |                |
| Alexion  | Advisory Board                                                                                               |                                                                                                                                                                                                                                                   |        |                |        |                |         |                |

|    |                                                                                                   | Name all entities with whom you have this relationship or indicate none (add rows as needed) | Specifications/Comments (e.g., if payments were made to you or to your institution) |
|----|---------------------------------------------------------------------------------------------------|----------------------------------------------------------------------------------------------|-------------------------------------------------------------------------------------|
| 10 | Leadership or fiduciary role in other board, society, committee or advocacy group, paid or unpaid | <input type="checkbox"/> None                                                                |                                                                                     |
|    |                                                                                                   | Editor for "Zeitschrift für Gastroenterologie"                                               |                                                                                     |
|    |                                                                                                   |                                                                                              |                                                                                     |
|    |                                                                                                   |                                                                                              |                                                                                     |
| 11 | Stock or stock options                                                                            | <input checked="" type="checkbox"/> None                                                     |                                                                                     |
|    |                                                                                                   |                                                                                              |                                                                                     |
|    |                                                                                                   |                                                                                              |                                                                                     |
|    |                                                                                                   |                                                                                              |                                                                                     |
| 12 | Receipt of equipment, materials, drugs, medical writing, gifts or other services                  | <input checked="" type="checkbox"/> None                                                     |                                                                                     |
|    |                                                                                                   |                                                                                              |                                                                                     |
|    |                                                                                                   |                                                                                              |                                                                                     |
|    |                                                                                                   |                                                                                              |                                                                                     |
| 13 | Other financial or non-financial interests                                                        | <input checked="" type="checkbox"/> None                                                     |                                                                                     |
|    |                                                                                                   |                                                                                              |                                                                                     |
|    |                                                                                                   |                                                                                              |                                                                                     |
|    |                                                                                                   |                                                                                              |                                                                                     |

Please place an "X" next to the following statement to indicate your agreement:

I certify that I have answered every question and have not altered the wording of any of the questions on this form.

## ICMJE DISCLOSURE FORM

**Date:** 9/15/2022

**Your Name:** Lucas Ernst

**Manuscript Title:** One-year follow-up of the CAPSID randomized trial for high-dose convalescent plasma in severe COVID-19 patients

**Manuscript Number (if known):** 163657-JCI-CMED-RV-2

In the interest of transparency, we ask you to disclose all relationships/activities/interests listed below that are related to the content of your manuscript. "Related" means any relation with for-profit or not-for-profit third parties whose interests may be affected by the content of the manuscript. Disclosure represents a commitment to transparency and does not necessarily indicate a bias. If you are in doubt about whether to list a relationship/activity/interest, it is preferable that you do so.

The author's relationships/activities/interests should be defined broadly. For example, if your manuscript pertains to the epidemiology of hypertension, you should declare all relationships with manufacturers of antihypertensive medication, even if that medication is not mentioned in the manuscript.

In item #1 below, report all support for the work reported in this manuscript without time limit. For all other items, the time frame for disclosure is the past 36 months.

|                                                                                                                                  |                                                                                                                                                                                  | Name all entities with whom you have this relationship or indicate none (add rows as needed) | Specifications/Comments (e.g., if payments were made to you or to your institution)                                                                                                                                                                                                                                                                                                                                                                                                                                                                                                                                                                                                                                                                                                                 |                                                                                                                                  |                                                                                                                                                                                  |  |                                                                                                                      |  |                                                 |  |                                                                 |
|----------------------------------------------------------------------------------------------------------------------------------|----------------------------------------------------------------------------------------------------------------------------------------------------------------------------------|----------------------------------------------------------------------------------------------|-----------------------------------------------------------------------------------------------------------------------------------------------------------------------------------------------------------------------------------------------------------------------------------------------------------------------------------------------------------------------------------------------------------------------------------------------------------------------------------------------------------------------------------------------------------------------------------------------------------------------------------------------------------------------------------------------------------------------------------------------------------------------------------------------------|----------------------------------------------------------------------------------------------------------------------------------|----------------------------------------------------------------------------------------------------------------------------------------------------------------------------------|--|----------------------------------------------------------------------------------------------------------------------|--|-------------------------------------------------|--|-----------------------------------------------------------------|
| Time frame: Since the initial planning of the work                                                                               |                                                                                                                                                                                  |                                                                                              |                                                                                                                                                                                                                                                                                                                                                                                                                                                                                                                                                                                                                                                                                                                                                                                                     |                                                                                                                                  |                                                                                                                                                                                  |  |                                                                                                                      |  |                                                 |  |                                                                 |
| <b>1</b>                                                                                                                         | All support for the present manuscript (e.g., funding, provision of study materials, medical writing, article processing charges, etc.)<br><b>No time limit for this item.</b>   | <input type="checkbox"/> <b>None</b>                                                         | <table border="1" style="width: 100%; border-collapse: collapse;"> <tr> <td style="width: 50%;">General funding started in 01.04.2020 and ended 31.05.2022<br/><b>German Federal Ministry of Health funded the clinical trial</b></td> <td style="width: 50%;"><b>German Federal Ministry of Health funded the clinical trial. Expense reimbursement for patient treatment paid by the sponsor DRK Blutspendedienst Baden-Württemberg Hesse</b></td> </tr> <tr> <td></td> <td>up to 4400 € per patient treated within the first part of the trial<br/>2000 € set up fee for initiation of the trial</td> </tr> <tr> <td></td> <td>up to 885 € per patient in the follow up period</td> </tr> <tr> <td></td> <td>All paid to participating institution [not to the investigator]</td> </tr> </table> | General funding started in 01.04.2020 and ended 31.05.2022<br><b>German Federal Ministry of Health funded the clinical trial</b> | <b>German Federal Ministry of Health funded the clinical trial. Expense reimbursement for patient treatment paid by the sponsor DRK Blutspendedienst Baden-Württemberg Hesse</b> |  | up to 4400 € per patient treated within the first part of the trial<br>2000 € set up fee for initiation of the trial |  | up to 885 € per patient in the follow up period |  | All paid to participating institution [not to the investigator] |
| General funding started in 01.04.2020 and ended 31.05.2022<br><b>German Federal Ministry of Health funded the clinical trial</b> | <b>German Federal Ministry of Health funded the clinical trial. Expense reimbursement for patient treatment paid by the sponsor DRK Blutspendedienst Baden-Württemberg Hesse</b> |                                                                                              |                                                                                                                                                                                                                                                                                                                                                                                                                                                                                                                                                                                                                                                                                                                                                                                                     |                                                                                                                                  |                                                                                                                                                                                  |  |                                                                                                                      |  |                                                 |  |                                                                 |
|                                                                                                                                  | up to 4400 € per patient treated within the first part of the trial<br>2000 € set up fee for initiation of the trial                                                             |                                                                                              |                                                                                                                                                                                                                                                                                                                                                                                                                                                                                                                                                                                                                                                                                                                                                                                                     |                                                                                                                                  |                                                                                                                                                                                  |  |                                                                                                                      |  |                                                 |  |                                                                 |
|                                                                                                                                  | up to 885 € per patient in the follow up period                                                                                                                                  |                                                                                              |                                                                                                                                                                                                                                                                                                                                                                                                                                                                                                                                                                                                                                                                                                                                                                                                     |                                                                                                                                  |                                                                                                                                                                                  |  |                                                                                                                      |  |                                                 |  |                                                                 |
|                                                                                                                                  | All paid to participating institution [not to the investigator]                                                                                                                  |                                                                                              |                                                                                                                                                                                                                                                                                                                                                                                                                                                                                                                                                                                                                                                                                                                                                                                                     |                                                                                                                                  |                                                                                                                                                                                  |  |                                                                                                                      |  |                                                 |  |                                                                 |
| Time frame: past 36 months                                                                                                       |                                                                                                                                                                                  |                                                                                              |                                                                                                                                                                                                                                                                                                                                                                                                                                                                                                                                                                                                                                                                                                                                                                                                     |                                                                                                                                  |                                                                                                                                                                                  |  |                                                                                                                      |  |                                                 |  |                                                                 |
| <b>2</b>                                                                                                                         | Grants or contracts from any entity (if not indicated in item #1 above).                                                                                                         | <input checked="" type="checkbox"/> <b>None</b>                                              | <table border="1" style="width: 100%; border-collapse: collapse;"> <tr><td style="width: 50%; height: 20px;"></td><td style="width: 50%;"></td></tr> <tr><td style="height: 20px;"></td><td></td></tr> <tr><td style="height: 20px;"></td><td></td></tr> </table>                                                                                                                                                                                                                                                                                                                                                                                                                                                                                                                                   |                                                                                                                                  |                                                                                                                                                                                  |  |                                                                                                                      |  |                                                 |  |                                                                 |
|                                                                                                                                  |                                                                                                                                                                                  |                                                                                              |                                                                                                                                                                                                                                                                                                                                                                                                                                                                                                                                                                                                                                                                                                                                                                                                     |                                                                                                                                  |                                                                                                                                                                                  |  |                                                                                                                      |  |                                                 |  |                                                                 |
|                                                                                                                                  |                                                                                                                                                                                  |                                                                                              |                                                                                                                                                                                                                                                                                                                                                                                                                                                                                                                                                                                                                                                                                                                                                                                                     |                                                                                                                                  |                                                                                                                                                                                  |  |                                                                                                                      |  |                                                 |  |                                                                 |
|                                                                                                                                  |                                                                                                                                                                                  |                                                                                              |                                                                                                                                                                                                                                                                                                                                                                                                                                                                                                                                                                                                                                                                                                                                                                                                     |                                                                                                                                  |                                                                                                                                                                                  |  |                                                                                                                      |  |                                                 |  |                                                                 |



|          | Name all entities with whom you have this relationship or indicate none (add rows as needed)                 | Specifications/Comments (e.g., if payments were made to you or to your institution)                                                                                                                     |  |  |  |  |  |  |
|----------|--------------------------------------------------------------------------------------------------------------|---------------------------------------------------------------------------------------------------------------------------------------------------------------------------------------------------------|--|--|--|--|--|--|
| <b>3</b> | Royalties or licenses                                                                                        | <input checked="" type="checkbox"/> <b>None</b><br><table border="1" data-bbox="437 383 1011 488"> <tr><td> </td><td> </td></tr> <tr><td> </td><td> </td></tr> <tr><td> </td><td> </td></tr> </table>   |  |  |  |  |  |  |
|          |                                                                                                              |                                                                                                                                                                                                         |  |  |  |  |  |  |
|          |                                                                                                              |                                                                                                                                                                                                         |  |  |  |  |  |  |
|          |                                                                                                              |                                                                                                                                                                                                         |  |  |  |  |  |  |
| <b>4</b> | Consulting fees                                                                                              | <input checked="" type="checkbox"/> <b>None</b><br><table border="1" data-bbox="437 629 1011 734"> <tr><td> </td><td> </td></tr> <tr><td> </td><td> </td></tr> <tr><td> </td><td> </td></tr> </table>   |  |  |  |  |  |  |
|          |                                                                                                              |                                                                                                                                                                                                         |  |  |  |  |  |  |
|          |                                                                                                              |                                                                                                                                                                                                         |  |  |  |  |  |  |
|          |                                                                                                              |                                                                                                                                                                                                         |  |  |  |  |  |  |
| <b>5</b> | Payment or honoraria for lectures, presentations, speakers bureaus, manuscript writing or educational events | <input checked="" type="checkbox"/> <b>None</b><br><table border="1" data-bbox="437 853 1011 958"> <tr><td> </td><td> </td></tr> <tr><td> </td><td> </td></tr> <tr><td> </td><td> </td></tr> </table>   |  |  |  |  |  |  |
|          |                                                                                                              |                                                                                                                                                                                                         |  |  |  |  |  |  |
|          |                                                                                                              |                                                                                                                                                                                                         |  |  |  |  |  |  |
|          |                                                                                                              |                                                                                                                                                                                                         |  |  |  |  |  |  |
| <b>6</b> | Payment for expert testimony                                                                                 | <input checked="" type="checkbox"/> <b>None</b><br><table border="1" data-bbox="437 1200 1011 1305"> <tr><td> </td><td> </td></tr> <tr><td> </td><td> </td></tr> <tr><td> </td><td> </td></tr> </table> |  |  |  |  |  |  |
|          |                                                                                                              |                                                                                                                                                                                                         |  |  |  |  |  |  |
|          |                                                                                                              |                                                                                                                                                                                                         |  |  |  |  |  |  |
|          |                                                                                                              |                                                                                                                                                                                                         |  |  |  |  |  |  |
| <b>7</b> | Support for attending meetings and/or travel                                                                 | <input checked="" type="checkbox"/> <b>None</b><br><table border="1" data-bbox="437 1413 1011 1518"> <tr><td> </td><td> </td></tr> <tr><td> </td><td> </td></tr> <tr><td> </td><td> </td></tr> </table> |  |  |  |  |  |  |
|          |                                                                                                              |                                                                                                                                                                                                         |  |  |  |  |  |  |
|          |                                                                                                              |                                                                                                                                                                                                         |  |  |  |  |  |  |
|          |                                                                                                              |                                                                                                                                                                                                         |  |  |  |  |  |  |
| <b>8</b> | Patents planned, issued or pending                                                                           | <input checked="" type="checkbox"/> <b>None</b><br><table border="1" data-bbox="437 1637 1011 1742"> <tr><td> </td><td> </td></tr> <tr><td> </td><td> </td></tr> <tr><td> </td><td> </td></tr> </table> |  |  |  |  |  |  |
|          |                                                                                                              |                                                                                                                                                                                                         |  |  |  |  |  |  |
|          |                                                                                                              |                                                                                                                                                                                                         |  |  |  |  |  |  |
|          |                                                                                                              |                                                                                                                                                                                                         |  |  |  |  |  |  |
| <b>9</b> | Participation on a Data Safety Monitoring Board or Advisory Board                                            | <input checked="" type="checkbox"/> <b>None</b><br><table border="1" data-bbox="437 1861 1011 1966"> <tr><td> </td><td> </td></tr> <tr><td> </td><td> </td></tr> <tr><td> </td><td> </td></tr> </table> |  |  |  |  |  |  |
|          |                                                                                                              |                                                                                                                                                                                                         |  |  |  |  |  |  |
|          |                                                                                                              |                                                                                                                                                                                                         |  |  |  |  |  |  |
|          |                                                                                                              |                                                                                                                                                                                                         |  |  |  |  |  |  |

|           | Name all entities with whom you have this relationship or indicate none (add rows as needed)      | Specifications/Comments (e.g., if payments were made to you or to your institution)                                                                                                                     |  |  |  |  |  |  |
|-----------|---------------------------------------------------------------------------------------------------|---------------------------------------------------------------------------------------------------------------------------------------------------------------------------------------------------------|--|--|--|--|--|--|
| <b>10</b> | Leadership or fiduciary role in other board, society, committee or advocacy group, paid or unpaid | <input checked="" type="checkbox"/> <b>None</b><br><table border="1" data-bbox="435 383 1520 488"> <tr><td> </td><td> </td></tr> <tr><td> </td><td> </td></tr> <tr><td> </td><td> </td></tr> </table>   |  |  |  |  |  |  |
|           |                                                                                                   |                                                                                                                                                                                                         |  |  |  |  |  |  |
|           |                                                                                                   |                                                                                                                                                                                                         |  |  |  |  |  |  |
|           |                                                                                                   |                                                                                                                                                                                                         |  |  |  |  |  |  |
| <b>11</b> | Stock or stock options                                                                            | <input checked="" type="checkbox"/> <b>None</b><br><table border="1" data-bbox="435 696 1520 801"> <tr><td> </td><td> </td></tr> <tr><td> </td><td> </td></tr> <tr><td> </td><td> </td></tr> </table>   |  |  |  |  |  |  |
|           |                                                                                                   |                                                                                                                                                                                                         |  |  |  |  |  |  |
|           |                                                                                                   |                                                                                                                                                                                                         |  |  |  |  |  |  |
|           |                                                                                                   |                                                                                                                                                                                                         |  |  |  |  |  |  |
| <b>12</b> | Receipt of equipment, materials, drugs, medical writing, gifts or other services                  | <input checked="" type="checkbox"/> <b>None</b><br><table border="1" data-bbox="435 916 1520 1021"> <tr><td> </td><td> </td></tr> <tr><td> </td><td> </td></tr> <tr><td> </td><td> </td></tr> </table>  |  |  |  |  |  |  |
|           |                                                                                                   |                                                                                                                                                                                                         |  |  |  |  |  |  |
|           |                                                                                                   |                                                                                                                                                                                                         |  |  |  |  |  |  |
|           |                                                                                                   |                                                                                                                                                                                                         |  |  |  |  |  |  |
| <b>13</b> | Other financial or non-financial interests                                                        | <input checked="" type="checkbox"/> <b>None</b><br><table border="1" data-bbox="435 1198 1520 1303"> <tr><td> </td><td> </td></tr> <tr><td> </td><td> </td></tr> <tr><td> </td><td> </td></tr> </table> |  |  |  |  |  |  |
|           |                                                                                                   |                                                                                                                                                                                                         |  |  |  |  |  |  |
|           |                                                                                                   |                                                                                                                                                                                                         |  |  |  |  |  |  |
|           |                                                                                                   |                                                                                                                                                                                                         |  |  |  |  |  |  |

**Please place an "X" next to the following statement to indicate your agreement:**

I certify that I have answered every question and have not altered the wording of any of the questions on this form.

## ICMJE DISCLOSURE FORM

**Date:** 9/15/2022

**Your Name:** Dr. Gregor Paul

**Manuscript Title:** One-year follow-up of the CAPSID randomized trial for high-dose convalescent plasma in severe COVID-19 patients

**Manuscript Number (if known):** 163657-JCI-CMED-RV-2

In the interest of transparency, we ask you to disclose all relationships/activities/interests listed below that are related to the content of your manuscript. "Related" means any relation with for-profit or not-for-profit third parties whose interests may be affected by the content of the manuscript. Disclosure represents a commitment to transparency and does not necessarily indicate a bias. If you are in doubt about whether to list a relationship/activity/interest, it is preferable that you do so.

The author's relationships/activities/interests should be defined broadly. For example, if your manuscript pertains to the epidemiology of hypertension, you should declare all relationships with manufacturers of antihypertensive medication, even if that medication is not mentioned in the manuscript.

In item #1 below, report all support for the work reported in this manuscript without time limit. For all other items, the time frame for disclosure is the past 36 months.

|                                                                                                                                  | Name all entities with whom you have this relationship or indicate none (add rows as needed)                                                                                     | Specifications/Comments (e.g., if payments were made to you or to your institution)                                                                                                                                                                                                                                                                                                                                                                                                                                                                                                                                                                                                                                                                                                                                                             |                                                                                                                                  |                                                                                                                                                                                  |  |                                                                                                                      |  |                                                 |  |                                                                 |
|----------------------------------------------------------------------------------------------------------------------------------|----------------------------------------------------------------------------------------------------------------------------------------------------------------------------------|-------------------------------------------------------------------------------------------------------------------------------------------------------------------------------------------------------------------------------------------------------------------------------------------------------------------------------------------------------------------------------------------------------------------------------------------------------------------------------------------------------------------------------------------------------------------------------------------------------------------------------------------------------------------------------------------------------------------------------------------------------------------------------------------------------------------------------------------------|----------------------------------------------------------------------------------------------------------------------------------|----------------------------------------------------------------------------------------------------------------------------------------------------------------------------------|--|----------------------------------------------------------------------------------------------------------------------|--|-------------------------------------------------|--|-----------------------------------------------------------------|
| Time frame: Since the initial planning of the work                                                                               |                                                                                                                                                                                  |                                                                                                                                                                                                                                                                                                                                                                                                                                                                                                                                                                                                                                                                                                                                                                                                                                                 |                                                                                                                                  |                                                                                                                                                                                  |  |                                                                                                                      |  |                                                 |  |                                                                 |
| <b>1</b>                                                                                                                         | All support for the present manuscript (e.g., funding, provision of study materials, medical writing, article processing charges, etc.)<br><b>No time limit for this item.</b>   | <input type="checkbox"/> <b>None</b><br><br><table border="1" style="width: 100%; border-collapse: collapse;"> <tr> <td style="width: 60%;">General funding started in 01.04.2020 and ended 31.05.2022<br/><b>German Federal Ministry of Health funded the clinical trial</b></td> <td style="width: 40%;"><b>German Federal Ministry of Health funded the clinical trial. Expense reimbursement for patient treatment paid by the sponsor DRK Blutspendedienst Baden-Württemberg Hesse</b></td> </tr> <tr> <td></td> <td>up to 4400 € per patient treated within the first part of the trial<br/>2000 € set up fee for initiation of the trial</td> </tr> <tr> <td></td> <td>up to 885 € per patient in the follow up period</td> </tr> <tr> <td></td> <td>All paid to participating institution [not to the investigator]</td> </tr> </table> | General funding started in 01.04.2020 and ended 31.05.2022<br><b>German Federal Ministry of Health funded the clinical trial</b> | <b>German Federal Ministry of Health funded the clinical trial. Expense reimbursement for patient treatment paid by the sponsor DRK Blutspendedienst Baden-Württemberg Hesse</b> |  | up to 4400 € per patient treated within the first part of the trial<br>2000 € set up fee for initiation of the trial |  | up to 885 € per patient in the follow up period |  | All paid to participating institution [not to the investigator] |
| General funding started in 01.04.2020 and ended 31.05.2022<br><b>German Federal Ministry of Health funded the clinical trial</b> | <b>German Federal Ministry of Health funded the clinical trial. Expense reimbursement for patient treatment paid by the sponsor DRK Blutspendedienst Baden-Württemberg Hesse</b> |                                                                                                                                                                                                                                                                                                                                                                                                                                                                                                                                                                                                                                                                                                                                                                                                                                                 |                                                                                                                                  |                                                                                                                                                                                  |  |                                                                                                                      |  |                                                 |  |                                                                 |
|                                                                                                                                  | up to 4400 € per patient treated within the first part of the trial<br>2000 € set up fee for initiation of the trial                                                             |                                                                                                                                                                                                                                                                                                                                                                                                                                                                                                                                                                                                                                                                                                                                                                                                                                                 |                                                                                                                                  |                                                                                                                                                                                  |  |                                                                                                                      |  |                                                 |  |                                                                 |
|                                                                                                                                  | up to 885 € per patient in the follow up period                                                                                                                                  |                                                                                                                                                                                                                                                                                                                                                                                                                                                                                                                                                                                                                                                                                                                                                                                                                                                 |                                                                                                                                  |                                                                                                                                                                                  |  |                                                                                                                      |  |                                                 |  |                                                                 |
|                                                                                                                                  | All paid to participating institution [not to the investigator]                                                                                                                  |                                                                                                                                                                                                                                                                                                                                                                                                                                                                                                                                                                                                                                                                                                                                                                                                                                                 |                                                                                                                                  |                                                                                                                                                                                  |  |                                                                                                                      |  |                                                 |  |                                                                 |
| Time frame: past 36 months                                                                                                       |                                                                                                                                                                                  |                                                                                                                                                                                                                                                                                                                                                                                                                                                                                                                                                                                                                                                                                                                                                                                                                                                 |                                                                                                                                  |                                                                                                                                                                                  |  |                                                                                                                      |  |                                                 |  |                                                                 |
| <b>2</b>                                                                                                                         | Grants or contracts from any entity (if not indicated in item #1 above).                                                                                                         | <input type="checkbox"/> <b>None</b><br><br><table border="1" style="width: 100%; border-collapse: collapse;"> <tr> <td style="width: 60%;">DRF e.v. for the contracts of a study 250.000€</td> <td style="width: 40%;"></td> </tr> <tr> <td></td> <td></td> </tr> <tr> <td></td> <td></td> </tr> </table>                                                                                                                                                                                                                                                                                                                                                                                                                                                                                                                                      | DRF e.v. for the contracts of a study 250.000€                                                                                   |                                                                                                                                                                                  |  |                                                                                                                      |  |                                                 |  |                                                                 |
| DRF e.v. for the contracts of a study 250.000€                                                                                   |                                                                                                                                                                                  |                                                                                                                                                                                                                                                                                                                                                                                                                                                                                                                                                                                                                                                                                                                                                                                                                                                 |                                                                                                                                  |                                                                                                                                                                                  |  |                                                                                                                      |  |                                                 |  |                                                                 |
|                                                                                                                                  |                                                                                                                                                                                  |                                                                                                                                                                                                                                                                                                                                                                                                                                                                                                                                                                                                                                                                                                                                                                                                                                                 |                                                                                                                                  |                                                                                                                                                                                  |  |                                                                                                                      |  |                                                 |  |                                                                 |
|                                                                                                                                  |                                                                                                                                                                                  |                                                                                                                                                                                                                                                                                                                                                                                                                                                                                                                                                                                                                                                                                                                                                                                                                                                 |                                                                                                                                  |                                                                                                                                                                                  |  |                                                                                                                      |  |                                                 |  |                                                                 |

|                   | Name all entities with whom you have this relationship or indicate none (add rows as needed)                 | Specifications/Comments (e.g., if payments were made to you or to your institution)                                                                                                                                       |                   |  |                  |  |  |  |
|-------------------|--------------------------------------------------------------------------------------------------------------|---------------------------------------------------------------------------------------------------------------------------------------------------------------------------------------------------------------------------|-------------------|--|------------------|--|--|--|
| <b>3</b>          | Royalties or licenses                                                                                        | <input checked="" type="checkbox"/> <b>None</b><br><table border="1" data-bbox="437 383 1011 488"> <tr><td> </td><td> </td></tr> <tr><td> </td><td> </td></tr> <tr><td> </td><td> </td></tr> </table>                     |                   |  |                  |  |  |  |
|                   |                                                                                                              |                                                                                                                                                                                                                           |                   |  |                  |  |  |  |
|                   |                                                                                                              |                                                                                                                                                                                                                           |                   |  |                  |  |  |  |
|                   |                                                                                                              |                                                                                                                                                                                                                           |                   |  |                  |  |  |  |
| <b>4</b>          | Consulting fees                                                                                              | <input checked="" type="checkbox"/> <b>None</b><br><table border="1" data-bbox="437 629 1011 734"> <tr><td> </td><td> </td></tr> <tr><td> </td><td> </td></tr> <tr><td> </td><td> </td></tr> </table>                     |                   |  |                  |  |  |  |
|                   |                                                                                                              |                                                                                                                                                                                                                           |                   |  |                  |  |  |  |
|                   |                                                                                                              |                                                                                                                                                                                                                           |                   |  |                  |  |  |  |
|                   |                                                                                                              |                                                                                                                                                                                                                           |                   |  |                  |  |  |  |
| <b>5</b>          | Payment or honoraria for lectures, presentations, speakers bureaus, manuscript writing or educational events | <input type="checkbox"/> <b>None</b><br><table border="1" data-bbox="437 853 1011 958"> <tr><td>AstraZeneca 1000€</td><td> </td></tr> <tr><td>Aposor GmbH 500€</td><td> </td></tr> <tr><td> </td><td> </td></tr> </table> | AstraZeneca 1000€ |  | Aposor GmbH 500€ |  |  |  |
| AstraZeneca 1000€ |                                                                                                              |                                                                                                                                                                                                                           |                   |  |                  |  |  |  |
| Aposor GmbH 500€  |                                                                                                              |                                                                                                                                                                                                                           |                   |  |                  |  |  |  |
|                   |                                                                                                              |                                                                                                                                                                                                                           |                   |  |                  |  |  |  |
| <b>6</b>          | Payment for expert testimony                                                                                 | <input checked="" type="checkbox"/> <b>None</b><br><table border="1" data-bbox="437 1200 1011 1305"> <tr><td> </td><td> </td></tr> <tr><td> </td><td> </td></tr> <tr><td> </td><td> </td></tr> </table>                   |                   |  |                  |  |  |  |
|                   |                                                                                                              |                                                                                                                                                                                                                           |                   |  |                  |  |  |  |
|                   |                                                                                                              |                                                                                                                                                                                                                           |                   |  |                  |  |  |  |
|                   |                                                                                                              |                                                                                                                                                                                                                           |                   |  |                  |  |  |  |
| <b>7</b>          | Support for attending meetings and/or travel                                                                 | <input checked="" type="checkbox"/> <b>None</b><br><table border="1" data-bbox="437 1413 1011 1518"> <tr><td> </td><td> </td></tr> <tr><td> </td><td> </td></tr> <tr><td> </td><td> </td></tr> </table>                   |                   |  |                  |  |  |  |
|                   |                                                                                                              |                                                                                                                                                                                                                           |                   |  |                  |  |  |  |
|                   |                                                                                                              |                                                                                                                                                                                                                           |                   |  |                  |  |  |  |
|                   |                                                                                                              |                                                                                                                                                                                                                           |                   |  |                  |  |  |  |
| <b>8</b>          | Patents planned, issued or pending                                                                           | <input checked="" type="checkbox"/> <b>None</b><br><table border="1" data-bbox="437 1637 1011 1742"> <tr><td> </td><td> </td></tr> <tr><td> </td><td> </td></tr> <tr><td> </td><td> </td></tr> </table>                   |                   |  |                  |  |  |  |
|                   |                                                                                                              |                                                                                                                                                                                                                           |                   |  |                  |  |  |  |
|                   |                                                                                                              |                                                                                                                                                                                                                           |                   |  |                  |  |  |  |
|                   |                                                                                                              |                                                                                                                                                                                                                           |                   |  |                  |  |  |  |
| <b>9</b>          | Participation on a Data Safety Monitoring Board or Advisory Board                                            | <input checked="" type="checkbox"/> <b>None</b><br><table border="1" data-bbox="437 1861 1011 1966"> <tr><td> </td><td> </td></tr> <tr><td> </td><td> </td></tr> <tr><td> </td><td> </td></tr> </table>                   |                   |  |                  |  |  |  |
|                   |                                                                                                              |                                                                                                                                                                                                                           |                   |  |                  |  |  |  |
|                   |                                                                                                              |                                                                                                                                                                                                                           |                   |  |                  |  |  |  |
|                   |                                                                                                              |                                                                                                                                                                                                                           |                   |  |                  |  |  |  |

|           | Name all entities with whom you have this relationship or indicate none (add rows as needed)      | Specifications/Comments (e.g., if payments were made to you or to your institution)                                                                                                                     |  |  |  |  |  |  |
|-----------|---------------------------------------------------------------------------------------------------|---------------------------------------------------------------------------------------------------------------------------------------------------------------------------------------------------------|--|--|--|--|--|--|
| <b>10</b> | Leadership or fiduciary role in other board, society, committee or advocacy group, paid or unpaid | <input checked="" type="checkbox"/> <b>None</b><br><table border="1" data-bbox="435 383 1516 488"> <tr><td> </td><td> </td></tr> <tr><td> </td><td> </td></tr> <tr><td> </td><td> </td></tr> </table>   |  |  |  |  |  |  |
|           |                                                                                                   |                                                                                                                                                                                                         |  |  |  |  |  |  |
|           |                                                                                                   |                                                                                                                                                                                                         |  |  |  |  |  |  |
|           |                                                                                                   |                                                                                                                                                                                                         |  |  |  |  |  |  |
| <b>11</b> | Stock or stock options                                                                            | <input checked="" type="checkbox"/> <b>None</b><br><table border="1" data-bbox="435 696 1516 801"> <tr><td> </td><td> </td></tr> <tr><td> </td><td> </td></tr> <tr><td> </td><td> </td></tr> </table>   |  |  |  |  |  |  |
|           |                                                                                                   |                                                                                                                                                                                                         |  |  |  |  |  |  |
|           |                                                                                                   |                                                                                                                                                                                                         |  |  |  |  |  |  |
|           |                                                                                                   |                                                                                                                                                                                                         |  |  |  |  |  |  |
| <b>12</b> | Receipt of equipment, materials, drugs, medical writing, gifts or other services                  | <input checked="" type="checkbox"/> <b>None</b><br><table border="1" data-bbox="435 916 1516 1021"> <tr><td> </td><td> </td></tr> <tr><td> </td><td> </td></tr> <tr><td> </td><td> </td></tr> </table>  |  |  |  |  |  |  |
|           |                                                                                                   |                                                                                                                                                                                                         |  |  |  |  |  |  |
|           |                                                                                                   |                                                                                                                                                                                                         |  |  |  |  |  |  |
|           |                                                                                                   |                                                                                                                                                                                                         |  |  |  |  |  |  |
| <b>13</b> | Other financial or non-financial interests                                                        | <input checked="" type="checkbox"/> <b>None</b><br><table border="1" data-bbox="435 1198 1516 1303"> <tr><td> </td><td> </td></tr> <tr><td> </td><td> </td></tr> <tr><td> </td><td> </td></tr> </table> |  |  |  |  |  |  |
|           |                                                                                                   |                                                                                                                                                                                                         |  |  |  |  |  |  |
|           |                                                                                                   |                                                                                                                                                                                                         |  |  |  |  |  |  |
|           |                                                                                                   |                                                                                                                                                                                                         |  |  |  |  |  |  |

**Please place an "X" next to the following statement to indicate your agreement:**

I certify that I have answered every question and have not altered the wording of any of the questions on this form.

## ICMJE DISCLOSURE FORM

**Date:** 9/15/2022

**Your Name:** Dr. Philipp Lepper

**Manuscript Title:** One-year follow-up of the CAPSID randomized trial for high-dose convalescent plasma in severe COVID-19 patients

**Manuscript Number (if known):** 163657-JCI-CMED-RV-2

In the interest of transparency, we ask you to disclose all relationships/activities/interests listed below that are related to the content of your manuscript. "Related" means any relation with for-profit or not-for-profit third parties whose interests may be affected by the content of the manuscript. Disclosure represents a commitment to transparency and does not necessarily indicate a bias. If you are in doubt about whether to list a relationship/activity/interest, it is preferable that you do so.

The author's relationships/activities/interests should be defined broadly. For example, if your manuscript pertains to the epidemiology of hypertension, you should declare all relationships with manufacturers of antihypertensive medication, even if that medication is not mentioned in the manuscript.

In item #1 below, report all support for the work reported in this manuscript without time limit. For all other items, the time frame for disclosure is the past 36 months.

|                                                                                                                                  | Name all entities with whom you have this relationship or indicate none (add rows as needed)                                                                                     | Specifications/Comments (e.g., if payments were made to you or to your institution)                                                                                                                                                                                                                                                                                                                                                                                                                                                                                                                                                                                                                                                                                                                                                             |                                                                                                                                  |                                                                                                                                                                                  |  |                                                                                                                      |  |                                                 |  |                                                                 |
|----------------------------------------------------------------------------------------------------------------------------------|----------------------------------------------------------------------------------------------------------------------------------------------------------------------------------|-------------------------------------------------------------------------------------------------------------------------------------------------------------------------------------------------------------------------------------------------------------------------------------------------------------------------------------------------------------------------------------------------------------------------------------------------------------------------------------------------------------------------------------------------------------------------------------------------------------------------------------------------------------------------------------------------------------------------------------------------------------------------------------------------------------------------------------------------|----------------------------------------------------------------------------------------------------------------------------------|----------------------------------------------------------------------------------------------------------------------------------------------------------------------------------|--|----------------------------------------------------------------------------------------------------------------------|--|-------------------------------------------------|--|-----------------------------------------------------------------|
| Time frame: Since the initial planning of the work                                                                               |                                                                                                                                                                                  |                                                                                                                                                                                                                                                                                                                                                                                                                                                                                                                                                                                                                                                                                                                                                                                                                                                 |                                                                                                                                  |                                                                                                                                                                                  |  |                                                                                                                      |  |                                                 |  |                                                                 |
| <b>1</b>                                                                                                                         | All support for the present manuscript (e.g., funding, provision of study materials, medical writing, article processing charges, etc.)<br><b>No time limit for this item.</b>   | <input type="checkbox"/> <b>None</b><br><br><table border="1" style="width: 100%; border-collapse: collapse;"> <tr> <td style="width: 60%;">General funding started in 01.04.2020 and ended 31.05.2022<br/><b>German Federal Ministry of Health funded the clinical trial</b></td> <td style="width: 40%;"><b>German Federal Ministry of Health funded the clinical trial. Expense reimbursement for patient treatment paid by the sponsor DRK Blutspendedienst Baden-Württemberg Hesse</b></td> </tr> <tr> <td></td> <td>up to 4400 € per patient treated within the first part of the trial<br/>2000 € set up fee for initiation of the trial</td> </tr> <tr> <td></td> <td>up to 885 € per patient in the follow up period</td> </tr> <tr> <td></td> <td>All paid to participating institution [not to the investigator]</td> </tr> </table> | General funding started in 01.04.2020 and ended 31.05.2022<br><b>German Federal Ministry of Health funded the clinical trial</b> | <b>German Federal Ministry of Health funded the clinical trial. Expense reimbursement for patient treatment paid by the sponsor DRK Blutspendedienst Baden-Württemberg Hesse</b> |  | up to 4400 € per patient treated within the first part of the trial<br>2000 € set up fee for initiation of the trial |  | up to 885 € per patient in the follow up period |  | All paid to participating institution [not to the investigator] |
| General funding started in 01.04.2020 and ended 31.05.2022<br><b>German Federal Ministry of Health funded the clinical trial</b> | <b>German Federal Ministry of Health funded the clinical trial. Expense reimbursement for patient treatment paid by the sponsor DRK Blutspendedienst Baden-Württemberg Hesse</b> |                                                                                                                                                                                                                                                                                                                                                                                                                                                                                                                                                                                                                                                                                                                                                                                                                                                 |                                                                                                                                  |                                                                                                                                                                                  |  |                                                                                                                      |  |                                                 |  |                                                                 |
|                                                                                                                                  | up to 4400 € per patient treated within the first part of the trial<br>2000 € set up fee for initiation of the trial                                                             |                                                                                                                                                                                                                                                                                                                                                                                                                                                                                                                                                                                                                                                                                                                                                                                                                                                 |                                                                                                                                  |                                                                                                                                                                                  |  |                                                                                                                      |  |                                                 |  |                                                                 |
|                                                                                                                                  | up to 885 € per patient in the follow up period                                                                                                                                  |                                                                                                                                                                                                                                                                                                                                                                                                                                                                                                                                                                                                                                                                                                                                                                                                                                                 |                                                                                                                                  |                                                                                                                                                                                  |  |                                                                                                                      |  |                                                 |  |                                                                 |
|                                                                                                                                  | All paid to participating institution [not to the investigator]                                                                                                                  |                                                                                                                                                                                                                                                                                                                                                                                                                                                                                                                                                                                                                                                                                                                                                                                                                                                 |                                                                                                                                  |                                                                                                                                                                                  |  |                                                                                                                      |  |                                                 |  |                                                                 |
| Time frame: past 36 months                                                                                                       |                                                                                                                                                                                  |                                                                                                                                                                                                                                                                                                                                                                                                                                                                                                                                                                                                                                                                                                                                                                                                                                                 |                                                                                                                                  |                                                                                                                                                                                  |  |                                                                                                                      |  |                                                 |  |                                                                 |
| <b>2</b>                                                                                                                         | Grants or contracts from any entity (if not indicated in item #1 above).                                                                                                         | <input checked="" type="checkbox"/> <b>None</b><br><br><table border="1" style="width: 100%; border-collapse: collapse;"> <tr><td style="width: 60%; height: 20px;"></td><td style="width: 40%;"></td></tr> <tr><td style="height: 20px;"></td><td></td></tr> <tr><td style="height: 20px;"></td><td></td></tr> </table>                                                                                                                                                                                                                                                                                                                                                                                                                                                                                                                        |                                                                                                                                  |                                                                                                                                                                                  |  |                                                                                                                      |  |                                                 |  |                                                                 |
|                                                                                                                                  |                                                                                                                                                                                  |                                                                                                                                                                                                                                                                                                                                                                                                                                                                                                                                                                                                                                                                                                                                                                                                                                                 |                                                                                                                                  |                                                                                                                                                                                  |  |                                                                                                                      |  |                                                 |  |                                                                 |
|                                                                                                                                  |                                                                                                                                                                                  |                                                                                                                                                                                                                                                                                                                                                                                                                                                                                                                                                                                                                                                                                                                                                                                                                                                 |                                                                                                                                  |                                                                                                                                                                                  |  |                                                                                                                      |  |                                                 |  |                                                                 |
|                                                                                                                                  |                                                                                                                                                                                  |                                                                                                                                                                                                                                                                                                                                                                                                                                                                                                                                                                                                                                                                                                                                                                                                                                                 |                                                                                                                                  |                                                                                                                                                                                  |  |                                                                                                                      |  |                                                 |  |                                                                 |

|          | Name all entities with whom you have this relationship or indicate none (add rows as needed)                 | Specifications/Comments (e.g., if payments were made to you or to your institution)                                                                                                                     |  |  |  |  |  |  |
|----------|--------------------------------------------------------------------------------------------------------------|---------------------------------------------------------------------------------------------------------------------------------------------------------------------------------------------------------|--|--|--|--|--|--|
| <b>3</b> | Royalties or licenses                                                                                        | <input checked="" type="checkbox"/> <b>None</b><br><table border="1" data-bbox="437 383 1520 488"> <tr><td> </td><td> </td></tr> <tr><td> </td><td> </td></tr> <tr><td> </td><td> </td></tr> </table>   |  |  |  |  |  |  |
|          |                                                                                                              |                                                                                                                                                                                                         |  |  |  |  |  |  |
|          |                                                                                                              |                                                                                                                                                                                                         |  |  |  |  |  |  |
|          |                                                                                                              |                                                                                                                                                                                                         |  |  |  |  |  |  |
| <b>4</b> | Consulting fees                                                                                              | <input checked="" type="checkbox"/> <b>None</b><br><table border="1" data-bbox="437 629 1520 734"> <tr><td> </td><td> </td></tr> <tr><td> </td><td> </td></tr> <tr><td> </td><td> </td></tr> </table>   |  |  |  |  |  |  |
|          |                                                                                                              |                                                                                                                                                                                                         |  |  |  |  |  |  |
|          |                                                                                                              |                                                                                                                                                                                                         |  |  |  |  |  |  |
|          |                                                                                                              |                                                                                                                                                                                                         |  |  |  |  |  |  |
| <b>5</b> | Payment or honoraria for lectures, presentations, speakers bureaus, manuscript writing or educational events | <input checked="" type="checkbox"/> <b>None</b><br><table border="1" data-bbox="437 853 1520 958"> <tr><td> </td><td> </td></tr> <tr><td> </td><td> </td></tr> <tr><td> </td><td> </td></tr> </table>   |  |  |  |  |  |  |
|          |                                                                                                              |                                                                                                                                                                                                         |  |  |  |  |  |  |
|          |                                                                                                              |                                                                                                                                                                                                         |  |  |  |  |  |  |
|          |                                                                                                              |                                                                                                                                                                                                         |  |  |  |  |  |  |
| <b>6</b> | Payment for expert testimony                                                                                 | <input checked="" type="checkbox"/> <b>None</b><br><table border="1" data-bbox="437 1200 1520 1305"> <tr><td> </td><td> </td></tr> <tr><td> </td><td> </td></tr> <tr><td> </td><td> </td></tr> </table> |  |  |  |  |  |  |
|          |                                                                                                              |                                                                                                                                                                                                         |  |  |  |  |  |  |
|          |                                                                                                              |                                                                                                                                                                                                         |  |  |  |  |  |  |
|          |                                                                                                              |                                                                                                                                                                                                         |  |  |  |  |  |  |
| <b>7</b> | Support for attending meetings and/or travel                                                                 | <input checked="" type="checkbox"/> <b>None</b><br><table border="1" data-bbox="437 1413 1520 1518"> <tr><td> </td><td> </td></tr> <tr><td> </td><td> </td></tr> <tr><td> </td><td> </td></tr> </table> |  |  |  |  |  |  |
|          |                                                                                                              |                                                                                                                                                                                                         |  |  |  |  |  |  |
|          |                                                                                                              |                                                                                                                                                                                                         |  |  |  |  |  |  |
|          |                                                                                                              |                                                                                                                                                                                                         |  |  |  |  |  |  |
| <b>8</b> | Patents planned, issued or pending                                                                           | <input checked="" type="checkbox"/> <b>None</b><br><table border="1" data-bbox="437 1637 1520 1742"> <tr><td> </td><td> </td></tr> <tr><td> </td><td> </td></tr> <tr><td> </td><td> </td></tr> </table> |  |  |  |  |  |  |
|          |                                                                                                              |                                                                                                                                                                                                         |  |  |  |  |  |  |
|          |                                                                                                              |                                                                                                                                                                                                         |  |  |  |  |  |  |
|          |                                                                                                              |                                                                                                                                                                                                         |  |  |  |  |  |  |
| <b>9</b> | Participation on a Data Safety Monitoring Board or Advisory Board                                            | <input checked="" type="checkbox"/> <b>None</b><br><table border="1" data-bbox="437 1861 1520 1966"> <tr><td> </td><td> </td></tr> <tr><td> </td><td> </td></tr> <tr><td> </td><td> </td></tr> </table> |  |  |  |  |  |  |
|          |                                                                                                              |                                                                                                                                                                                                         |  |  |  |  |  |  |
|          |                                                                                                              |                                                                                                                                                                                                         |  |  |  |  |  |  |
|          |                                                                                                              |                                                                                                                                                                                                         |  |  |  |  |  |  |

|           | Name all entities with whom you have this relationship or indicate none (add rows as needed)      | Specifications/Comments (e.g., if payments were made to you or to your institution)                                                                                                                     |  |  |  |  |  |  |
|-----------|---------------------------------------------------------------------------------------------------|---------------------------------------------------------------------------------------------------------------------------------------------------------------------------------------------------------|--|--|--|--|--|--|
| <b>10</b> | Leadership or fiduciary role in other board, society, committee or advocacy group, paid or unpaid | <input checked="" type="checkbox"/> <b>None</b><br><table border="1" data-bbox="435 383 1520 488"> <tr><td> </td><td> </td></tr> <tr><td> </td><td> </td></tr> <tr><td> </td><td> </td></tr> </table>   |  |  |  |  |  |  |
|           |                                                                                                   |                                                                                                                                                                                                         |  |  |  |  |  |  |
|           |                                                                                                   |                                                                                                                                                                                                         |  |  |  |  |  |  |
|           |                                                                                                   |                                                                                                                                                                                                         |  |  |  |  |  |  |
| <b>11</b> | Stock or stock options                                                                            | <input checked="" type="checkbox"/> <b>None</b><br><table border="1" data-bbox="435 696 1520 801"> <tr><td> </td><td> </td></tr> <tr><td> </td><td> </td></tr> <tr><td> </td><td> </td></tr> </table>   |  |  |  |  |  |  |
|           |                                                                                                   |                                                                                                                                                                                                         |  |  |  |  |  |  |
|           |                                                                                                   |                                                                                                                                                                                                         |  |  |  |  |  |  |
|           |                                                                                                   |                                                                                                                                                                                                         |  |  |  |  |  |  |
| <b>12</b> | Receipt of equipment, materials, drugs, medical writing, gifts or other services                  | <input checked="" type="checkbox"/> <b>None</b><br><table border="1" data-bbox="435 916 1520 1021"> <tr><td> </td><td> </td></tr> <tr><td> </td><td> </td></tr> <tr><td> </td><td> </td></tr> </table>  |  |  |  |  |  |  |
|           |                                                                                                   |                                                                                                                                                                                                         |  |  |  |  |  |  |
|           |                                                                                                   |                                                                                                                                                                                                         |  |  |  |  |  |  |
|           |                                                                                                   |                                                                                                                                                                                                         |  |  |  |  |  |  |
| <b>13</b> | Other financial or non-financial interests                                                        | <input checked="" type="checkbox"/> <b>None</b><br><table border="1" data-bbox="435 1198 1520 1303"> <tr><td> </td><td> </td></tr> <tr><td> </td><td> </td></tr> <tr><td> </td><td> </td></tr> </table> |  |  |  |  |  |  |
|           |                                                                                                   |                                                                                                                                                                                                         |  |  |  |  |  |  |
|           |                                                                                                   |                                                                                                                                                                                                         |  |  |  |  |  |  |
|           |                                                                                                   |                                                                                                                                                                                                         |  |  |  |  |  |  |

**Please place an "X" next to the following statement to indicate your agreement:**

I certify that I have answered every question and have not altered the wording of any of the questions on this form.



## ICMJE DISCLOSURE FORM

**Date:** 9/15/2022

**Your Name:** Prof. Dr. Manfred Weiss

**Manuscript Title:** One-year follow-up of the CAPSID randomized trial for high-dose convalescent plasma in severe COVID-19 patients

**Manuscript Number (if known):** 163657-JCI-CMED-RV-2

In the interest of transparency, we ask you to disclose all relationships/activities/interests listed below that are related to the content of your manuscript. "Related" means any relation with for-profit or not-for-profit third parties whose interests may be affected by the content of the manuscript. Disclosure represents a commitment to transparency and does not necessarily indicate a bias. If you are in doubt about whether to list a relationship/activity/interest, it is preferable that you do so.

The author's relationships/activities/interests should be defined broadly. For example, if your manuscript pertains to the epidemiology of hypertension, you should declare all relationships with manufacturers of antihypertensive medication, even if that medication is not mentioned in the manuscript.

In item #1 below, report all support for the work reported in this manuscript without time limit. For all other items, the time frame for disclosure is the past 36 months.

|                                                                                                                                  | Name all entities with whom you have this relationship or indicate none (add rows as needed)                                                                                   | Specifications/Comments (e.g., if payments were made to you or to your institution)                                                                                                                                                                                                                                                                                                                                                                                                                                                                                                                                                                                                                                                                                                                                                |                                                                                                                                  |                                                                                                                                                                           |  |                                                                                                                |  |                                                 |  |                                                                 |
|----------------------------------------------------------------------------------------------------------------------------------|--------------------------------------------------------------------------------------------------------------------------------------------------------------------------------|------------------------------------------------------------------------------------------------------------------------------------------------------------------------------------------------------------------------------------------------------------------------------------------------------------------------------------------------------------------------------------------------------------------------------------------------------------------------------------------------------------------------------------------------------------------------------------------------------------------------------------------------------------------------------------------------------------------------------------------------------------------------------------------------------------------------------------|----------------------------------------------------------------------------------------------------------------------------------|---------------------------------------------------------------------------------------------------------------------------------------------------------------------------|--|----------------------------------------------------------------------------------------------------------------|--|-------------------------------------------------|--|-----------------------------------------------------------------|
| Time frame: Since the initial planning of the work                                                                               |                                                                                                                                                                                |                                                                                                                                                                                                                                                                                                                                                                                                                                                                                                                                                                                                                                                                                                                                                                                                                                    |                                                                                                                                  |                                                                                                                                                                           |  |                                                                                                                |  |                                                 |  |                                                                 |
| <b>1</b>                                                                                                                         | All support for the present manuscript (e.g., funding, provision of study materials, medical writing, article processing charges, etc.)<br><b>No time limit for this item.</b> | <input type="checkbox"/> <b>None</b><br><br><table border="1" style="width: 100%; border-collapse: collapse;"> <tr> <td style="width: 60%;">General funding started in 01.04.2020 and ended 31.05.2022<br/><b>German Federal Ministry of Health funded the clinical trial</b></td> <td style="width: 40%;">German Federal Ministry of Health funded the clinical trial. Expense reimbursement for patient treatment paid by the sponsor DRK Blutspendedienst Baden-Württemberg Hesse</td> </tr> <tr> <td></td> <td>up to 4400 € per patient treated within the part of the trial<br/>2000 € set up fee for initiation of the trial</td> </tr> <tr> <td></td> <td>up to 885 € per patient in the follow up period</td> </tr> <tr> <td></td> <td>All paid to participating institution [not to the investigator]</td> </tr> </table> | General funding started in 01.04.2020 and ended 31.05.2022<br><b>German Federal Ministry of Health funded the clinical trial</b> | German Federal Ministry of Health funded the clinical trial. Expense reimbursement for patient treatment paid by the sponsor DRK Blutspendedienst Baden-Württemberg Hesse |  | up to 4400 € per patient treated within the part of the trial<br>2000 € set up fee for initiation of the trial |  | up to 885 € per patient in the follow up period |  | All paid to participating institution [not to the investigator] |
| General funding started in 01.04.2020 and ended 31.05.2022<br><b>German Federal Ministry of Health funded the clinical trial</b> | German Federal Ministry of Health funded the clinical trial. Expense reimbursement for patient treatment paid by the sponsor DRK Blutspendedienst Baden-Württemberg Hesse      |                                                                                                                                                                                                                                                                                                                                                                                                                                                                                                                                                                                                                                                                                                                                                                                                                                    |                                                                                                                                  |                                                                                                                                                                           |  |                                                                                                                |  |                                                 |  |                                                                 |
|                                                                                                                                  | up to 4400 € per patient treated within the part of the trial<br>2000 € set up fee for initiation of the trial                                                                 |                                                                                                                                                                                                                                                                                                                                                                                                                                                                                                                                                                                                                                                                                                                                                                                                                                    |                                                                                                                                  |                                                                                                                                                                           |  |                                                                                                                |  |                                                 |  |                                                                 |
|                                                                                                                                  | up to 885 € per patient in the follow up period                                                                                                                                |                                                                                                                                                                                                                                                                                                                                                                                                                                                                                                                                                                                                                                                                                                                                                                                                                                    |                                                                                                                                  |                                                                                                                                                                           |  |                                                                                                                |  |                                                 |  |                                                                 |
|                                                                                                                                  | All paid to participating institution [not to the investigator]                                                                                                                |                                                                                                                                                                                                                                                                                                                                                                                                                                                                                                                                                                                                                                                                                                                                                                                                                                    |                                                                                                                                  |                                                                                                                                                                           |  |                                                                                                                |  |                                                 |  |                                                                 |
| Time frame: past 36 months                                                                                                       |                                                                                                                                                                                |                                                                                                                                                                                                                                                                                                                                                                                                                                                                                                                                                                                                                                                                                                                                                                                                                                    |                                                                                                                                  |                                                                                                                                                                           |  |                                                                                                                |  |                                                 |  |                                                                 |
| <b>2</b>                                                                                                                         | Grants or contracts from any entity (if not indicated in item #1 above).                                                                                                       | <input checked="" type="checkbox"/> <b>None</b><br><br><table border="1" style="width: 100%; border-collapse: collapse;"> <tr><td style="height: 20px;"> </td><td> </td></tr> <tr><td style="height: 20px;"> </td><td> </td></tr> <tr><td style="height: 20px;"> </td><td> </td></tr> </table>                                                                                                                                                                                                                                                                                                                                                                                                                                                                                                                                     |                                                                                                                                  |                                                                                                                                                                           |  |                                                                                                                |  |                                                 |  |                                                                 |
|                                                                                                                                  |                                                                                                                                                                                |                                                                                                                                                                                                                                                                                                                                                                                                                                                                                                                                                                                                                                                                                                                                                                                                                                    |                                                                                                                                  |                                                                                                                                                                           |  |                                                                                                                |  |                                                 |  |                                                                 |
|                                                                                                                                  |                                                                                                                                                                                |                                                                                                                                                                                                                                                                                                                                                                                                                                                                                                                                                                                                                                                                                                                                                                                                                                    |                                                                                                                                  |                                                                                                                                                                           |  |                                                                                                                |  |                                                 |  |                                                                 |
|                                                                                                                                  |                                                                                                                                                                                |                                                                                                                                                                                                                                                                                                                                                                                                                                                                                                                                                                                                                                                                                                                                                                                                                                    |                                                                                                                                  |                                                                                                                                                                           |  |                                                                                                                |  |                                                 |  |                                                                 |

|          | Name all entities with whom you have this relationship or indicate none (add rows as needed)                 | Specifications/Comments (e.g., if payments were made to you or to your institution)                                                                                                                     |  |  |  |  |  |  |
|----------|--------------------------------------------------------------------------------------------------------------|---------------------------------------------------------------------------------------------------------------------------------------------------------------------------------------------------------|--|--|--|--|--|--|
| <b>3</b> | Royalties or licenses                                                                                        | <input checked="" type="checkbox"/> <b>None</b><br><table border="1" data-bbox="437 383 1011 488"> <tr><td> </td><td> </td></tr> <tr><td> </td><td> </td></tr> <tr><td> </td><td> </td></tr> </table>   |  |  |  |  |  |  |
|          |                                                                                                              |                                                                                                                                                                                                         |  |  |  |  |  |  |
|          |                                                                                                              |                                                                                                                                                                                                         |  |  |  |  |  |  |
|          |                                                                                                              |                                                                                                                                                                                                         |  |  |  |  |  |  |
| <b>4</b> | Consulting fees                                                                                              | <input checked="" type="checkbox"/> <b>None</b><br><table border="1" data-bbox="437 629 1011 734"> <tr><td> </td><td> </td></tr> <tr><td> </td><td> </td></tr> <tr><td> </td><td> </td></tr> </table>   |  |  |  |  |  |  |
|          |                                                                                                              |                                                                                                                                                                                                         |  |  |  |  |  |  |
|          |                                                                                                              |                                                                                                                                                                                                         |  |  |  |  |  |  |
|          |                                                                                                              |                                                                                                                                                                                                         |  |  |  |  |  |  |
| <b>5</b> | Payment or honoraria for lectures, presentations, speakers bureaus, manuscript writing or educational events | <input checked="" type="checkbox"/> <b>None</b><br><table border="1" data-bbox="437 853 1011 958"> <tr><td> </td><td> </td></tr> <tr><td> </td><td> </td></tr> <tr><td> </td><td> </td></tr> </table>   |  |  |  |  |  |  |
|          |                                                                                                              |                                                                                                                                                                                                         |  |  |  |  |  |  |
|          |                                                                                                              |                                                                                                                                                                                                         |  |  |  |  |  |  |
|          |                                                                                                              |                                                                                                                                                                                                         |  |  |  |  |  |  |
| <b>6</b> | Payment for expert testimony                                                                                 | <input checked="" type="checkbox"/> <b>None</b><br><table border="1" data-bbox="437 1200 1011 1305"> <tr><td> </td><td> </td></tr> <tr><td> </td><td> </td></tr> <tr><td> </td><td> </td></tr> </table> |  |  |  |  |  |  |
|          |                                                                                                              |                                                                                                                                                                                                         |  |  |  |  |  |  |
|          |                                                                                                              |                                                                                                                                                                                                         |  |  |  |  |  |  |
|          |                                                                                                              |                                                                                                                                                                                                         |  |  |  |  |  |  |
| <b>7</b> | Support for attending meetings and/or travel                                                                 | <input checked="" type="checkbox"/> <b>None</b><br><table border="1" data-bbox="437 1413 1011 1518"> <tr><td> </td><td> </td></tr> <tr><td> </td><td> </td></tr> <tr><td> </td><td> </td></tr> </table> |  |  |  |  |  |  |
|          |                                                                                                              |                                                                                                                                                                                                         |  |  |  |  |  |  |
|          |                                                                                                              |                                                                                                                                                                                                         |  |  |  |  |  |  |
|          |                                                                                                              |                                                                                                                                                                                                         |  |  |  |  |  |  |
| <b>8</b> | Patents planned, issued or pending                                                                           | <input checked="" type="checkbox"/> <b>None</b><br><table border="1" data-bbox="437 1637 1011 1742"> <tr><td> </td><td> </td></tr> <tr><td> </td><td> </td></tr> <tr><td> </td><td> </td></tr> </table> |  |  |  |  |  |  |
|          |                                                                                                              |                                                                                                                                                                                                         |  |  |  |  |  |  |
|          |                                                                                                              |                                                                                                                                                                                                         |  |  |  |  |  |  |
|          |                                                                                                              |                                                                                                                                                                                                         |  |  |  |  |  |  |
| <b>9</b> | Participation on a Data Safety Monitoring Board or Advisory Board                                            | <input checked="" type="checkbox"/> <b>None</b><br><table border="1" data-bbox="437 1861 1011 1966"> <tr><td> </td><td> </td></tr> <tr><td> </td><td> </td></tr> <tr><td> </td><td> </td></tr> </table> |  |  |  |  |  |  |
|          |                                                                                                              |                                                                                                                                                                                                         |  |  |  |  |  |  |
|          |                                                                                                              |                                                                                                                                                                                                         |  |  |  |  |  |  |
|          |                                                                                                              |                                                                                                                                                                                                         |  |  |  |  |  |  |

|           | Name all entities with whom you have this relationship or indicate none (add rows as needed)      | Specifications/Comments (e.g., if payments were made to you or to your institution)                                                                                                                     |  |  |  |  |  |  |
|-----------|---------------------------------------------------------------------------------------------------|---------------------------------------------------------------------------------------------------------------------------------------------------------------------------------------------------------|--|--|--|--|--|--|
| <b>10</b> | Leadership or fiduciary role in other board, society, committee or advocacy group, paid or unpaid | <input checked="" type="checkbox"/> <b>None</b><br><table border="1" data-bbox="435 383 1013 488"> <tr><td> </td><td> </td></tr> <tr><td> </td><td> </td></tr> <tr><td> </td><td> </td></tr> </table>   |  |  |  |  |  |  |
|           |                                                                                                   |                                                                                                                                                                                                         |  |  |  |  |  |  |
|           |                                                                                                   |                                                                                                                                                                                                         |  |  |  |  |  |  |
|           |                                                                                                   |                                                                                                                                                                                                         |  |  |  |  |  |  |
| <b>11</b> | Stock or stock options                                                                            | <input checked="" type="checkbox"/> <b>None</b><br><table border="1" data-bbox="435 696 1013 801"> <tr><td> </td><td> </td></tr> <tr><td> </td><td> </td></tr> <tr><td> </td><td> </td></tr> </table>   |  |  |  |  |  |  |
|           |                                                                                                   |                                                                                                                                                                                                         |  |  |  |  |  |  |
|           |                                                                                                   |                                                                                                                                                                                                         |  |  |  |  |  |  |
|           |                                                                                                   |                                                                                                                                                                                                         |  |  |  |  |  |  |
| <b>12</b> | Receipt of equipment, materials, drugs, medical writing, gifts or other services                  | <input checked="" type="checkbox"/> <b>None</b><br><table border="1" data-bbox="435 916 1013 1021"> <tr><td> </td><td> </td></tr> <tr><td> </td><td> </td></tr> <tr><td> </td><td> </td></tr> </table>  |  |  |  |  |  |  |
|           |                                                                                                   |                                                                                                                                                                                                         |  |  |  |  |  |  |
|           |                                                                                                   |                                                                                                                                                                                                         |  |  |  |  |  |  |
|           |                                                                                                   |                                                                                                                                                                                                         |  |  |  |  |  |  |
| <b>13</b> | Other financial or non-financial interests                                                        | <input checked="" type="checkbox"/> <b>None</b><br><table border="1" data-bbox="435 1198 1013 1303"> <tr><td> </td><td> </td></tr> <tr><td> </td><td> </td></tr> <tr><td> </td><td> </td></tr> </table> |  |  |  |  |  |  |
|           |                                                                                                   |                                                                                                                                                                                                         |  |  |  |  |  |  |
|           |                                                                                                   |                                                                                                                                                                                                         |  |  |  |  |  |  |
|           |                                                                                                   |                                                                                                                                                                                                         |  |  |  |  |  |  |

**Please place an "X" next to the following statement to indicate your agreement:**

I certify that I have answered every question and have not altered the wording of any of the questions on this form.

## ICMJE DISCLOSURE FORM

**Date:** 9/15/2022

**Your Name:** Prof. Dr. Daniel Zickler

**Manuscript Title:** One-year follow-up of the CAPSID randomized trial for high-dose convalescent plasma in severe COVID-19 patients

**Manuscript Number (if known):** 163657-JCI-CMED-RV-2

In the interest of transparency, we ask you to disclose all relationships/activities/interests listed below that are related to the content of your manuscript. "Related" means any relation with for-profit or not-for-profit third parties whose interests may be affected by the content of the manuscript. Disclosure represents a commitment to transparency and does not necessarily indicate a bias. If you are in doubt about whether to list a relationship/activity/interest, it is preferable that you do so.

The author's relationships/activities/interests should be defined broadly. For example, if your manuscript pertains to the epidemiology of hypertension, you should declare all relationships with manufacturers of antihypertensive medication, even if that medication is not mentioned in the manuscript.

In item #1 below, report all support for the work reported in this manuscript without time limit. For all other items, the time frame for disclosure is the past 36 months.

|                                                                                                                                  |                                                                                                                                                                                | Name all entities with whom you have this relationship or indicate none (add rows as needed)                                                                                                                                                                                                                                                                                                                                                                                                                                                                                                                                                                                                                                                                                                   | Specifications/Comments (e.g., if payments were made to you or to your institution)                                              |                                                                    |  |                                                             |  |                                                                                                                |  |                                                 |  |                                                                 |                                                                                                                                                                           |
|----------------------------------------------------------------------------------------------------------------------------------|--------------------------------------------------------------------------------------------------------------------------------------------------------------------------------|------------------------------------------------------------------------------------------------------------------------------------------------------------------------------------------------------------------------------------------------------------------------------------------------------------------------------------------------------------------------------------------------------------------------------------------------------------------------------------------------------------------------------------------------------------------------------------------------------------------------------------------------------------------------------------------------------------------------------------------------------------------------------------------------|----------------------------------------------------------------------------------------------------------------------------------|--------------------------------------------------------------------|--|-------------------------------------------------------------|--|----------------------------------------------------------------------------------------------------------------|--|-------------------------------------------------|--|-----------------------------------------------------------------|---------------------------------------------------------------------------------------------------------------------------------------------------------------------------|
| Time frame: Since the initial planning of the work                                                                               |                                                                                                                                                                                |                                                                                                                                                                                                                                                                                                                                                                                                                                                                                                                                                                                                                                                                                                                                                                                                |                                                                                                                                  |                                                                    |  |                                                             |  |                                                                                                                |  |                                                 |  |                                                                 |                                                                                                                                                                           |
| <b>1</b>                                                                                                                         | All support for the present manuscript (e.g., funding, provision of study materials, medical writing, article processing charges, etc.)<br><b>No time limit for this item.</b> | <input type="checkbox"/> None <table border="1" style="width: 100%; margin-top: 10px;"> <tr> <td style="width: 60%;">General funding started in 01.04.2020 and ended 31.05.2022<br/><b>German Federal Ministry of Health funded the clinical trial</b></td> <td style="width: 40%;"><b>German Federal Ministry of Health funded the clinical trial</b></td> </tr> <tr> <td></td> <td>German Federal Ministry of Health funded the clinical trial</td> </tr> <tr> <td></td> <td>up to 4400 € per patient treated within the part of the trial<br/>2000 € set up fee for initiation of the trial</td> </tr> <tr> <td></td> <td>up to 885 € per patient in the follow up period</td> </tr> <tr> <td></td> <td>All paid to participating institution [not to the investigator]</td> </tr> </table> | General funding started in 01.04.2020 and ended 31.05.2022<br><b>German Federal Ministry of Health funded the clinical trial</b> | <b>German Federal Ministry of Health funded the clinical trial</b> |  | German Federal Ministry of Health funded the clinical trial |  | up to 4400 € per patient treated within the part of the trial<br>2000 € set up fee for initiation of the trial |  | up to 885 € per patient in the follow up period |  | All paid to participating institution [not to the investigator] | German Federal Ministry of Health funded the clinical trial. Expense reimbursement for patient treatment paid by the sponsor DRK Blutspendedienst Baden-Württemberg Hesse |
| General funding started in 01.04.2020 and ended 31.05.2022<br><b>German Federal Ministry of Health funded the clinical trial</b> | <b>German Federal Ministry of Health funded the clinical trial</b>                                                                                                             |                                                                                                                                                                                                                                                                                                                                                                                                                                                                                                                                                                                                                                                                                                                                                                                                |                                                                                                                                  |                                                                    |  |                                                             |  |                                                                                                                |  |                                                 |  |                                                                 |                                                                                                                                                                           |
|                                                                                                                                  | German Federal Ministry of Health funded the clinical trial                                                                                                                    |                                                                                                                                                                                                                                                                                                                                                                                                                                                                                                                                                                                                                                                                                                                                                                                                |                                                                                                                                  |                                                                    |  |                                                             |  |                                                                                                                |  |                                                 |  |                                                                 |                                                                                                                                                                           |
|                                                                                                                                  | up to 4400 € per patient treated within the part of the trial<br>2000 € set up fee for initiation of the trial                                                                 |                                                                                                                                                                                                                                                                                                                                                                                                                                                                                                                                                                                                                                                                                                                                                                                                |                                                                                                                                  |                                                                    |  |                                                             |  |                                                                                                                |  |                                                 |  |                                                                 |                                                                                                                                                                           |
|                                                                                                                                  | up to 885 € per patient in the follow up period                                                                                                                                |                                                                                                                                                                                                                                                                                                                                                                                                                                                                                                                                                                                                                                                                                                                                                                                                |                                                                                                                                  |                                                                    |  |                                                             |  |                                                                                                                |  |                                                 |  |                                                                 |                                                                                                                                                                           |
|                                                                                                                                  | All paid to participating institution [not to the investigator]                                                                                                                |                                                                                                                                                                                                                                                                                                                                                                                                                                                                                                                                                                                                                                                                                                                                                                                                |                                                                                                                                  |                                                                    |  |                                                             |  |                                                                                                                |  |                                                 |  |                                                                 |                                                                                                                                                                           |
| Time frame: past 36 months                                                                                                       |                                                                                                                                                                                |                                                                                                                                                                                                                                                                                                                                                                                                                                                                                                                                                                                                                                                                                                                                                                                                |                                                                                                                                  |                                                                    |  |                                                             |  |                                                                                                                |  |                                                 |  |                                                                 |                                                                                                                                                                           |
| <b>2</b>                                                                                                                         | Grants or contracts from any entity (if not indicated in item #1 above).                                                                                                       | <input checked="" type="checkbox"/> None <table border="1" style="width: 100%; margin-top: 10px;"> <tr><td style="width: 60%;"></td><td style="width: 40%;"></td></tr> <tr><td></td><td></td></tr> <tr><td></td><td></td></tr> </table>                                                                                                                                                                                                                                                                                                                                                                                                                                                                                                                                                        |                                                                                                                                  |                                                                    |  |                                                             |  |                                                                                                                |  |                                                 |  |                                                                 |                                                                                                                                                                           |
|                                                                                                                                  |                                                                                                                                                                                |                                                                                                                                                                                                                                                                                                                                                                                                                                                                                                                                                                                                                                                                                                                                                                                                |                                                                                                                                  |                                                                    |  |                                                             |  |                                                                                                                |  |                                                 |  |                                                                 |                                                                                                                                                                           |
|                                                                                                                                  |                                                                                                                                                                                |                                                                                                                                                                                                                                                                                                                                                                                                                                                                                                                                                                                                                                                                                                                                                                                                |                                                                                                                                  |                                                                    |  |                                                             |  |                                                                                                                |  |                                                 |  |                                                                 |                                                                                                                                                                           |
|                                                                                                                                  |                                                                                                                                                                                |                                                                                                                                                                                                                                                                                                                                                                                                                                                                                                                                                                                                                                                                                                                                                                                                |                                                                                                                                  |                                                                    |  |                                                             |  |                                                                                                                |  |                                                 |  |                                                                 |                                                                                                                                                                           |

|   | Name all entities with whom you have this relationship or indicate none (add rows as needed)                 | Specifications/Comments (e.g., if payments were made to you or to your institution)                                                                                                               |  |  |  |  |  |  |
|---|--------------------------------------------------------------------------------------------------------------|---------------------------------------------------------------------------------------------------------------------------------------------------------------------------------------------------|--|--|--|--|--|--|
| 3 | Royalties or licenses                                                                                        | <input checked="" type="checkbox"/> <b>None</b><br><table border="1" data-bbox="437 383 1011 488"> <tr><td></td><td></td></tr> <tr><td></td><td></td></tr> <tr><td></td><td></td></tr> </table>   |  |  |  |  |  |  |
|   |                                                                                                              |                                                                                                                                                                                                   |  |  |  |  |  |  |
|   |                                                                                                              |                                                                                                                                                                                                   |  |  |  |  |  |  |
|   |                                                                                                              |                                                                                                                                                                                                   |  |  |  |  |  |  |
| 4 | Consulting fees                                                                                              | <input checked="" type="checkbox"/> <b>None</b><br><table border="1" data-bbox="437 629 1011 734"> <tr><td></td><td></td></tr> <tr><td></td><td></td></tr> <tr><td></td><td></td></tr> </table>   |  |  |  |  |  |  |
|   |                                                                                                              |                                                                                                                                                                                                   |  |  |  |  |  |  |
|   |                                                                                                              |                                                                                                                                                                                                   |  |  |  |  |  |  |
|   |                                                                                                              |                                                                                                                                                                                                   |  |  |  |  |  |  |
| 5 | Payment or honoraria for lectures, presentations, speakers bureaus, manuscript writing or educational events | <input checked="" type="checkbox"/> <b>None</b><br><table border="1" data-bbox="437 853 1011 958"> <tr><td></td><td></td></tr> <tr><td></td><td></td></tr> <tr><td></td><td></td></tr> </table>   |  |  |  |  |  |  |
|   |                                                                                                              |                                                                                                                                                                                                   |  |  |  |  |  |  |
|   |                                                                                                              |                                                                                                                                                                                                   |  |  |  |  |  |  |
|   |                                                                                                              |                                                                                                                                                                                                   |  |  |  |  |  |  |
| 6 | Payment for expert testimony                                                                                 | <input checked="" type="checkbox"/> <b>None</b><br><table border="1" data-bbox="437 1200 1011 1305"> <tr><td></td><td></td></tr> <tr><td></td><td></td></tr> <tr><td></td><td></td></tr> </table> |  |  |  |  |  |  |
|   |                                                                                                              |                                                                                                                                                                                                   |  |  |  |  |  |  |
|   |                                                                                                              |                                                                                                                                                                                                   |  |  |  |  |  |  |
|   |                                                                                                              |                                                                                                                                                                                                   |  |  |  |  |  |  |
| 7 | Support for attending meetings and/or travel                                                                 | <input checked="" type="checkbox"/> <b>None</b><br><table border="1" data-bbox="437 1413 1011 1518"> <tr><td></td><td></td></tr> <tr><td></td><td></td></tr> <tr><td></td><td></td></tr> </table> |  |  |  |  |  |  |
|   |                                                                                                              |                                                                                                                                                                                                   |  |  |  |  |  |  |
|   |                                                                                                              |                                                                                                                                                                                                   |  |  |  |  |  |  |
|   |                                                                                                              |                                                                                                                                                                                                   |  |  |  |  |  |  |
| 8 | Patents planned, issued or pending                                                                           | <input checked="" type="checkbox"/> <b>None</b><br><table border="1" data-bbox="437 1637 1011 1742"> <tr><td></td><td></td></tr> <tr><td></td><td></td></tr> <tr><td></td><td></td></tr> </table> |  |  |  |  |  |  |
|   |                                                                                                              |                                                                                                                                                                                                   |  |  |  |  |  |  |
|   |                                                                                                              |                                                                                                                                                                                                   |  |  |  |  |  |  |
|   |                                                                                                              |                                                                                                                                                                                                   |  |  |  |  |  |  |
| 9 | Participation on a Data Safety Monitoring Board or Advisory Board                                            | <input checked="" type="checkbox"/> <b>None</b><br><table border="1" data-bbox="437 1850 1011 1955"> <tr><td></td><td></td></tr> <tr><td></td><td></td></tr> <tr><td></td><td></td></tr> </table> |  |  |  |  |  |  |
|   |                                                                                                              |                                                                                                                                                                                                   |  |  |  |  |  |  |
|   |                                                                                                              |                                                                                                                                                                                                   |  |  |  |  |  |  |
|   |                                                                                                              |                                                                                                                                                                                                   |  |  |  |  |  |  |

|           | Name all entities with whom you have this relationship or indicate none (add rows as needed)      | Specifications/Comments (e.g., if payments were made to you or to your institution)                                                                                                                     |  |  |  |  |  |  |
|-----------|---------------------------------------------------------------------------------------------------|---------------------------------------------------------------------------------------------------------------------------------------------------------------------------------------------------------|--|--|--|--|--|--|
| <b>10</b> | Leadership or fiduciary role in other board, society, committee or advocacy group, paid or unpaid | <input checked="" type="checkbox"/> <b>None</b><br><table border="1" data-bbox="435 383 1013 488"> <tr><td> </td><td> </td></tr> <tr><td> </td><td> </td></tr> <tr><td> </td><td> </td></tr> </table>   |  |  |  |  |  |  |
|           |                                                                                                   |                                                                                                                                                                                                         |  |  |  |  |  |  |
|           |                                                                                                   |                                                                                                                                                                                                         |  |  |  |  |  |  |
|           |                                                                                                   |                                                                                                                                                                                                         |  |  |  |  |  |  |
| <b>11</b> | Stock or stock options                                                                            | <input checked="" type="checkbox"/> <b>None</b><br><table border="1" data-bbox="435 696 1013 801"> <tr><td> </td><td> </td></tr> <tr><td> </td><td> </td></tr> <tr><td> </td><td> </td></tr> </table>   |  |  |  |  |  |  |
|           |                                                                                                   |                                                                                                                                                                                                         |  |  |  |  |  |  |
|           |                                                                                                   |                                                                                                                                                                                                         |  |  |  |  |  |  |
|           |                                                                                                   |                                                                                                                                                                                                         |  |  |  |  |  |  |
| <b>12</b> | Receipt of equipment, materials, drugs, medical writing, gifts or other services                  | <input checked="" type="checkbox"/> <b>None</b><br><table border="1" data-bbox="435 916 1013 1021"> <tr><td> </td><td> </td></tr> <tr><td> </td><td> </td></tr> <tr><td> </td><td> </td></tr> </table>  |  |  |  |  |  |  |
|           |                                                                                                   |                                                                                                                                                                                                         |  |  |  |  |  |  |
|           |                                                                                                   |                                                                                                                                                                                                         |  |  |  |  |  |  |
|           |                                                                                                   |                                                                                                                                                                                                         |  |  |  |  |  |  |
| <b>13</b> | Other financial or non-financial interests                                                        | <input checked="" type="checkbox"/> <b>None</b><br><table border="1" data-bbox="435 1198 1013 1303"> <tr><td> </td><td> </td></tr> <tr><td> </td><td> </td></tr> <tr><td> </td><td> </td></tr> </table> |  |  |  |  |  |  |
|           |                                                                                                   |                                                                                                                                                                                                         |  |  |  |  |  |  |
|           |                                                                                                   |                                                                                                                                                                                                         |  |  |  |  |  |  |
|           |                                                                                                   |                                                                                                                                                                                                         |  |  |  |  |  |  |

**Please place an "X" next to the following statement to indicate your agreement:**

I certify that I have answered every question and have not altered the wording of any of the questions on this form.

## ICMJE DISCLOSURE FORM

**Date:** 9/15/2022

**Your Name:** Prof. Dr. Kai Zacharowski

**Manuscript Title:** One-year follow-up of the CAPSID randomized trial for high-dose convalescent plasma in severe COVID-19 patients

**Manuscript Number (if known):** 163657-JCI-CMED-RV-2

In the interest of transparency, we ask you to disclose all relationships/activities/interests listed below that are related to the content of your manuscript. "Related" means any relation with for-profit or not-for-profit third parties whose interests may be affected by the content of the manuscript. Disclosure represents a commitment to transparency and does not necessarily indicate a bias. If you are in doubt about whether to list a relationship/activity/interest, it is preferable that you do so.

The author's relationships/activities/interests should be defined broadly. For example, if your manuscript pertains to the epidemiology of hypertension, you should declare all relationships with manufacturers of antihypertensive medication, even if that medication is not mentioned in the manuscript.

In item #1 below, report all support for the work reported in this manuscript without time limit. For all other items, the time frame for disclosure is the past 36 months.

|                                                           |                                                                                                                                                                                | Name all entities with whom you have this relationship or indicate none (add rows as needed)                                     | Specifications/Comments (e.g., if payments were made to you or to your institution)                                                                                              |
|-----------------------------------------------------------|--------------------------------------------------------------------------------------------------------------------------------------------------------------------------------|----------------------------------------------------------------------------------------------------------------------------------|----------------------------------------------------------------------------------------------------------------------------------------------------------------------------------|
| <b>Time frame: Since the initial planning of the work</b> |                                                                                                                                                                                |                                                                                                                                  |                                                                                                                                                                                  |
| <b>1</b>                                                  | All support for the present manuscript (e.g., funding, provision of study materials, medical writing, article processing charges, etc.)<br><b>No time limit for this item.</b> | <input type="checkbox"/> <b>None</b>                                                                                             |                                                                                                                                                                                  |
|                                                           |                                                                                                                                                                                | General funding started in 01.04.2020 and ended 31.05.2022<br><b>German Federal Ministry of Health funded the clinical trial</b> | <b>German Federal Ministry of Health funded the clinical trial. Expense reimbursement for patient treatment paid by the sponsor DRK Blutspendedienst Baden-Württemberg Hesse</b> |
|                                                           |                                                                                                                                                                                |                                                                                                                                  | up to 4400 € per patient treated within the part of the trial<br>2000 € set up fee for initiation of the trial                                                                   |
|                                                           |                                                                                                                                                                                |                                                                                                                                  | up to 885 € per patient in the follow up period                                                                                                                                  |
|                                                           |                                                                                                                                                                                |                                                                                                                                  | All paid to participating institution [not to the investigator]                                                                                                                  |
| <b>Time frame: past 36 months</b>                         |                                                                                                                                                                                |                                                                                                                                  |                                                                                                                                                                                  |
| <b>2</b>                                                  | Grants or contracts from any entity (if not indicated in item #1 above).                                                                                                       | <input type="checkbox"/> <b>None</b>                                                                                             |                                                                                                                                                                                  |
|                                                           |                                                                                                                                                                                | European Union Horizon 2020                                                                                                      | Envision                                                                                                                                                                         |
|                                                           |                                                                                                                                                                                |                                                                                                                                  |                                                                                                                                                                                  |

|                          | Name all entities with whom you have this relationship or indicate none (add rows as needed)                 | Specifications/Comments (e.g., if payments were made to you or to your institution)                                                                                                                               |                          |  |  |  |  |  |
|--------------------------|--------------------------------------------------------------------------------------------------------------|-------------------------------------------------------------------------------------------------------------------------------------------------------------------------------------------------------------------|--------------------------|--|--|--|--|--|
| <b>3</b>                 | Royalties or licenses                                                                                        | <input checked="" type="checkbox"/> <b>None</b><br><table border="1" data-bbox="437 383 1011 488"> <tr><td> </td><td> </td></tr> <tr><td> </td><td> </td></tr> <tr><td> </td><td> </td></tr> </table>             |                          |  |  |  |  |  |
|                          |                                                                                                              |                                                                                                                                                                                                                   |                          |  |  |  |  |  |
|                          |                                                                                                              |                                                                                                                                                                                                                   |                          |  |  |  |  |  |
|                          |                                                                                                              |                                                                                                                                                                                                                   |                          |  |  |  |  |  |
| <b>4</b>                 | Consulting fees                                                                                              | <input type="checkbox"/> <b>None</b><br><table border="1" data-bbox="437 629 1011 763"> <tr><td>CSL Vifor, CE Healthcare</td><td> </td></tr> <tr><td> </td><td> </td></tr> <tr><td> </td><td> </td></tr> </table> | CSL Vifor, CE Healthcare |  |  |  |  |  |
| CSL Vifor, CE Healthcare |                                                                                                              |                                                                                                                                                                                                                   |                          |  |  |  |  |  |
|                          |                                                                                                              |                                                                                                                                                                                                                   |                          |  |  |  |  |  |
|                          |                                                                                                              |                                                                                                                                                                                                                   |                          |  |  |  |  |  |
| <b>5</b>                 | Payment or honoraria for lectures, presentations, speakers bureaus, manuscript writing or educational events | <input checked="" type="checkbox"/> <b>None</b><br><table border="1" data-bbox="437 853 1011 958"> <tr><td> </td><td> </td></tr> <tr><td> </td><td> </td></tr> <tr><td> </td><td> </td></tr> </table>             |                          |  |  |  |  |  |
|                          |                                                                                                              |                                                                                                                                                                                                                   |                          |  |  |  |  |  |
|                          |                                                                                                              |                                                                                                                                                                                                                   |                          |  |  |  |  |  |
|                          |                                                                                                              |                                                                                                                                                                                                                   |                          |  |  |  |  |  |
| <b>6</b>                 | Payment for expert testimony                                                                                 | <input checked="" type="checkbox"/> <b>None</b><br><table border="1" data-bbox="437 1200 1011 1305"> <tr><td> </td><td> </td></tr> <tr><td> </td><td> </td></tr> <tr><td> </td><td> </td></tr> </table>           |                          |  |  |  |  |  |
|                          |                                                                                                              |                                                                                                                                                                                                                   |                          |  |  |  |  |  |
|                          |                                                                                                              |                                                                                                                                                                                                                   |                          |  |  |  |  |  |
|                          |                                                                                                              |                                                                                                                                                                                                                   |                          |  |  |  |  |  |
| <b>7</b>                 | Support for attending meetings and/or travel                                                                 | <input checked="" type="checkbox"/> <b>None</b><br><table border="1" data-bbox="437 1424 1011 1529"> <tr><td> </td><td> </td></tr> <tr><td> </td><td> </td></tr> <tr><td> </td><td> </td></tr> </table>           |                          |  |  |  |  |  |
|                          |                                                                                                              |                                                                                                                                                                                                                   |                          |  |  |  |  |  |
|                          |                                                                                                              |                                                                                                                                                                                                                   |                          |  |  |  |  |  |
|                          |                                                                                                              |                                                                                                                                                                                                                   |                          |  |  |  |  |  |
| <b>8</b>                 | Patents planned, issued or pending                                                                           | <input checked="" type="checkbox"/> <b>None</b><br><table border="1" data-bbox="437 1637 1011 1742"> <tr><td> </td><td> </td></tr> <tr><td> </td><td> </td></tr> <tr><td> </td><td> </td></tr> </table>           |                          |  |  |  |  |  |
|                          |                                                                                                              |                                                                                                                                                                                                                   |                          |  |  |  |  |  |
|                          |                                                                                                              |                                                                                                                                                                                                                   |                          |  |  |  |  |  |
|                          |                                                                                                              |                                                                                                                                                                                                                   |                          |  |  |  |  |  |
| <b>9</b>                 | Participation on a Data Safety Monitoring Board or Advisory Board                                            | <input type="checkbox"/> <b>None</b><br><table border="1" data-bbox="437 1861 1011 1966"> <tr><td>Haemonetics, CLS Vifor</td><td> </td></tr> <tr><td> </td><td> </td></tr> <tr><td> </td><td> </td></tr> </table> | Haemonetics, CLS Vifor   |  |  |  |  |  |
| Haemonetics, CLS Vifor   |                                                                                                              |                                                                                                                                                                                                                   |                          |  |  |  |  |  |
|                          |                                                                                                              |                                                                                                                                                                                                                   |                          |  |  |  |  |  |
|                          |                                                                                                              |                                                                                                                                                                                                                   |                          |  |  |  |  |  |



|           | Name all entities with whom you have this relationship or indicate none (add rows as needed)      | Specifications/Comments (e.g., if payments were made to you or to your institution)                                                                                                                     |  |  |  |  |  |  |
|-----------|---------------------------------------------------------------------------------------------------|---------------------------------------------------------------------------------------------------------------------------------------------------------------------------------------------------------|--|--|--|--|--|--|
| <b>10</b> | Leadership or fiduciary role in other board, society, committee or advocacy group, paid or unpaid | <input checked="" type="checkbox"/> <b>None</b><br><table border="1" data-bbox="435 383 1013 488"> <tr><td> </td><td> </td></tr> <tr><td> </td><td> </td></tr> <tr><td> </td><td> </td></tr> </table>   |  |  |  |  |  |  |
|           |                                                                                                   |                                                                                                                                                                                                         |  |  |  |  |  |  |
|           |                                                                                                   |                                                                                                                                                                                                         |  |  |  |  |  |  |
|           |                                                                                                   |                                                                                                                                                                                                         |  |  |  |  |  |  |
| <b>11</b> | Stock or stock options                                                                            | <input checked="" type="checkbox"/> <b>None</b><br><table border="1" data-bbox="435 696 1013 801"> <tr><td> </td><td> </td></tr> <tr><td> </td><td> </td></tr> <tr><td> </td><td> </td></tr> </table>   |  |  |  |  |  |  |
|           |                                                                                                   |                                                                                                                                                                                                         |  |  |  |  |  |  |
|           |                                                                                                   |                                                                                                                                                                                                         |  |  |  |  |  |  |
|           |                                                                                                   |                                                                                                                                                                                                         |  |  |  |  |  |  |
| <b>12</b> | Receipt of equipment, materials, drugs, medical writing, gifts or other services                  | <input checked="" type="checkbox"/> <b>None</b><br><table border="1" data-bbox="435 916 1013 1021"> <tr><td> </td><td> </td></tr> <tr><td> </td><td> </td></tr> <tr><td> </td><td> </td></tr> </table>  |  |  |  |  |  |  |
|           |                                                                                                   |                                                                                                                                                                                                         |  |  |  |  |  |  |
|           |                                                                                                   |                                                                                                                                                                                                         |  |  |  |  |  |  |
|           |                                                                                                   |                                                                                                                                                                                                         |  |  |  |  |  |  |
| <b>13</b> | Other financial or non-financial interests                                                        | <input checked="" type="checkbox"/> <b>None</b><br><table border="1" data-bbox="435 1198 1013 1303"> <tr><td> </td><td> </td></tr> <tr><td> </td><td> </td></tr> <tr><td> </td><td> </td></tr> </table> |  |  |  |  |  |  |
|           |                                                                                                   |                                                                                                                                                                                                         |  |  |  |  |  |  |
|           |                                                                                                   |                                                                                                                                                                                                         |  |  |  |  |  |  |
|           |                                                                                                   |                                                                                                                                                                                                         |  |  |  |  |  |  |

**Please place an "X" next to the following statement to indicate your agreement:**

I certify that I have answered every question and have not altered the wording of any of the questions on this form.

## ICMJE DISCLOSURE FORM

**Date:** 9/15/2022

**Your Name:** Prof. Dr. Hinnerk Wulf

**Manuscript Title:** One-year follow-up of the CAPSID randomized trial for high-dose convalescent plasma in severe COVID-19 patients

**Manuscript Number (if known):** 163657-JCI-CMED-RV-2

In the interest of transparency, we ask you to disclose all relationships/activities/interests listed below that are related to the content of your manuscript. "Related" means any relation with for-profit or not-for-profit third parties whose interests may be affected by the content of the manuscript. Disclosure represents a commitment to transparency and does not necessarily indicate a bias. If you are in doubt about whether to list a relationship/activity/interest, it is preferable that you do so.

The author's relationships/activities/interests should be defined broadly. For example, if your manuscript pertains to the epidemiology of hypertension, you should declare all relationships with manufacturers of antihypertensive medication, even if that medication is not mentioned in the manuscript.

In item #1 below, report all support for the work reported in this manuscript without time limit. For all other items, the time frame for disclosure is the past 36 months.

|                                                                                                                                  |                                                                                                                                                                                  | Name all entities with whom you have this relationship or indicate none (add rows as needed)                                                                                                                                                                                                                                                                                                                                                                                                                                                                                                                                                                                                                                                                                                                             | Specifications/Comments (e.g., if payments were made to you or to your institution)                                              |                                                                                                                                                                                  |  |                                                                                                                      |  |                                                 |  |                                                                 |  |
|----------------------------------------------------------------------------------------------------------------------------------|----------------------------------------------------------------------------------------------------------------------------------------------------------------------------------|--------------------------------------------------------------------------------------------------------------------------------------------------------------------------------------------------------------------------------------------------------------------------------------------------------------------------------------------------------------------------------------------------------------------------------------------------------------------------------------------------------------------------------------------------------------------------------------------------------------------------------------------------------------------------------------------------------------------------------------------------------------------------------------------------------------------------|----------------------------------------------------------------------------------------------------------------------------------|----------------------------------------------------------------------------------------------------------------------------------------------------------------------------------|--|----------------------------------------------------------------------------------------------------------------------|--|-------------------------------------------------|--|-----------------------------------------------------------------|--|
| Time frame: Since the initial planning of the work                                                                               |                                                                                                                                                                                  |                                                                                                                                                                                                                                                                                                                                                                                                                                                                                                                                                                                                                                                                                                                                                                                                                          |                                                                                                                                  |                                                                                                                                                                                  |  |                                                                                                                      |  |                                                 |  |                                                                 |  |
| <b>1</b>                                                                                                                         | All support for the present manuscript (e.g., funding, provision of study materials, medical writing, article processing charges, etc.)<br><b>No time limit for this item.</b>   | <input type="checkbox"/> None <table border="1" style="width: 100%; margin-top: 10px;"> <tr> <td style="width: 60%;">General funding started in 01.04.2020 and ended 31.05.2022<br/><b>German Federal Ministry of Health funded the clinical trial</b></td> <td style="width: 40%;"><b>German Federal Ministry of Health funded the clinical trial. Expense reimbursement for patient treatment paid by the sponsor DRK Blutspendedienst Baden-Württemberg Hesse</b></td> </tr> <tr> <td></td> <td>up to 4400 € per patient treated within the first part of the trial<br/>2000 € set up fee for initiation of the trial</td> </tr> <tr> <td></td> <td>up to 885 € per patient in the follow up period</td> </tr> <tr> <td></td> <td>All paid to participating institution [not to the investigator]</td> </tr> </table> | General funding started in 01.04.2020 and ended 31.05.2022<br><b>German Federal Ministry of Health funded the clinical trial</b> | <b>German Federal Ministry of Health funded the clinical trial. Expense reimbursement for patient treatment paid by the sponsor DRK Blutspendedienst Baden-Württemberg Hesse</b> |  | up to 4400 € per patient treated within the first part of the trial<br>2000 € set up fee for initiation of the trial |  | up to 885 € per patient in the follow up period |  | All paid to participating institution [not to the investigator] |  |
| General funding started in 01.04.2020 and ended 31.05.2022<br><b>German Federal Ministry of Health funded the clinical trial</b> | <b>German Federal Ministry of Health funded the clinical trial. Expense reimbursement for patient treatment paid by the sponsor DRK Blutspendedienst Baden-Württemberg Hesse</b> |                                                                                                                                                                                                                                                                                                                                                                                                                                                                                                                                                                                                                                                                                                                                                                                                                          |                                                                                                                                  |                                                                                                                                                                                  |  |                                                                                                                      |  |                                                 |  |                                                                 |  |
|                                                                                                                                  | up to 4400 € per patient treated within the first part of the trial<br>2000 € set up fee for initiation of the trial                                                             |                                                                                                                                                                                                                                                                                                                                                                                                                                                                                                                                                                                                                                                                                                                                                                                                                          |                                                                                                                                  |                                                                                                                                                                                  |  |                                                                                                                      |  |                                                 |  |                                                                 |  |
|                                                                                                                                  | up to 885 € per patient in the follow up period                                                                                                                                  |                                                                                                                                                                                                                                                                                                                                                                                                                                                                                                                                                                                                                                                                                                                                                                                                                          |                                                                                                                                  |                                                                                                                                                                                  |  |                                                                                                                      |  |                                                 |  |                                                                 |  |
|                                                                                                                                  | All paid to participating institution [not to the investigator]                                                                                                                  |                                                                                                                                                                                                                                                                                                                                                                                                                                                                                                                                                                                                                                                                                                                                                                                                                          |                                                                                                                                  |                                                                                                                                                                                  |  |                                                                                                                      |  |                                                 |  |                                                                 |  |
| Time frame: past 36 months                                                                                                       |                                                                                                                                                                                  |                                                                                                                                                                                                                                                                                                                                                                                                                                                                                                                                                                                                                                                                                                                                                                                                                          |                                                                                                                                  |                                                                                                                                                                                  |  |                                                                                                                      |  |                                                 |  |                                                                 |  |
| <b>2</b>                                                                                                                         | Grants or contracts from any entity (if not indicated in item #1 above).                                                                                                         | <input checked="" type="checkbox"/> None <table border="1" style="width: 100%; margin-top: 10px;"> <tr><td style="width: 60%;"></td><td style="width: 40%;"></td></tr> <tr><td></td><td></td></tr> <tr><td></td><td></td></tr> </table>                                                                                                                                                                                                                                                                                                                                                                                                                                                                                                                                                                                  |                                                                                                                                  |                                                                                                                                                                                  |  |                                                                                                                      |  |                                                 |  |                                                                 |  |
|                                                                                                                                  |                                                                                                                                                                                  |                                                                                                                                                                                                                                                                                                                                                                                                                                                                                                                                                                                                                                                                                                                                                                                                                          |                                                                                                                                  |                                                                                                                                                                                  |  |                                                                                                                      |  |                                                 |  |                                                                 |  |
|                                                                                                                                  |                                                                                                                                                                                  |                                                                                                                                                                                                                                                                                                                                                                                                                                                                                                                                                                                                                                                                                                                                                                                                                          |                                                                                                                                  |                                                                                                                                                                                  |  |                                                                                                                      |  |                                                 |  |                                                                 |  |
|                                                                                                                                  |                                                                                                                                                                                  |                                                                                                                                                                                                                                                                                                                                                                                                                                                                                                                                                                                                                                                                                                                                                                                                                          |                                                                                                                                  |                                                                                                                                                                                  |  |                                                                                                                      |  |                                                 |  |                                                                 |  |

|            | Name all entities with whom you have this relationship or indicate none (add rows as needed)                 | Specifications/Comments (e.g., if payments were made to you or to your institution)                                                                                                                                                                                                    |            |  |           |  |         |  |           |  |  |  |
|------------|--------------------------------------------------------------------------------------------------------------|----------------------------------------------------------------------------------------------------------------------------------------------------------------------------------------------------------------------------------------------------------------------------------------|------------|--|-----------|--|---------|--|-----------|--|--|--|
| <b>3</b>   | Royalties or licenses                                                                                        | <input checked="" type="checkbox"/> <b>None</b><br><table border="1" data-bbox="437 385 1011 488"> <tr><td> </td><td> </td></tr> <tr><td> </td><td> </td></tr> <tr><td> </td><td> </td></tr> </table>                                                                                  |            |  |           |  |         |  |           |  |  |  |
|            |                                                                                                              |                                                                                                                                                                                                                                                                                        |            |  |           |  |         |  |           |  |  |  |
|            |                                                                                                              |                                                                                                                                                                                                                                                                                        |            |  |           |  |         |  |           |  |  |  |
|            |                                                                                                              |                                                                                                                                                                                                                                                                                        |            |  |           |  |         |  |           |  |  |  |
| <b>4</b>   | Consulting fees                                                                                              | <input checked="" type="checkbox"/> <b>None</b><br><table border="1" data-bbox="437 631 1011 757"> <tr><td> </td><td> </td></tr> <tr><td> </td><td> </td></tr> <tr><td> </td><td> </td></tr> </table>                                                                                  |            |  |           |  |         |  |           |  |  |  |
|            |                                                                                                              |                                                                                                                                                                                                                                                                                        |            |  |           |  |         |  |           |  |  |  |
|            |                                                                                                              |                                                                                                                                                                                                                                                                                        |            |  |           |  |         |  |           |  |  |  |
|            |                                                                                                              |                                                                                                                                                                                                                                                                                        |            |  |           |  |         |  |           |  |  |  |
| <b>5</b>   | Payment or honoraria for lectures, presentations, speakers bureaus, manuscript writing or educational events | <input type="checkbox"/> <b>None</b><br><table border="1" data-bbox="437 855 1011 1016"> <tr><td>Grünenthal</td><td> </td></tr> <tr><td>Sintetica</td><td> </td></tr> <tr><td>Edwards</td><td> </td></tr> <tr><td>Medtronic</td><td> </td></tr> <tr><td> </td><td> </td></tr> </table> | Grünenthal |  | Sintetica |  | Edwards |  | Medtronic |  |  |  |
| Grünenthal |                                                                                                              |                                                                                                                                                                                                                                                                                        |            |  |           |  |         |  |           |  |  |  |
| Sintetica  |                                                                                                              |                                                                                                                                                                                                                                                                                        |            |  |           |  |         |  |           |  |  |  |
| Edwards    |                                                                                                              |                                                                                                                                                                                                                                                                                        |            |  |           |  |         |  |           |  |  |  |
| Medtronic  |                                                                                                              |                                                                                                                                                                                                                                                                                        |            |  |           |  |         |  |           |  |  |  |
|            |                                                                                                              |                                                                                                                                                                                                                                                                                        |            |  |           |  |         |  |           |  |  |  |
| <b>6</b>   | Payment for expert testimony                                                                                 | <input checked="" type="checkbox"/> <b>None</b><br><table border="1" data-bbox="437 1200 1011 1303"> <tr><td> </td><td> </td></tr> <tr><td> </td><td> </td></tr> <tr><td> </td><td> </td></tr> </table>                                                                                |            |  |           |  |         |  |           |  |  |  |
|            |                                                                                                              |                                                                                                                                                                                                                                                                                        |            |  |           |  |         |  |           |  |  |  |
|            |                                                                                                              |                                                                                                                                                                                                                                                                                        |            |  |           |  |         |  |           |  |  |  |
|            |                                                                                                              |                                                                                                                                                                                                                                                                                        |            |  |           |  |         |  |           |  |  |  |
| <b>7</b>   | Support for attending meetings and/or travel                                                                 | <input checked="" type="checkbox"/> <b>None</b><br><table border="1" data-bbox="437 1415 1011 1518"> <tr><td> </td><td> </td></tr> <tr><td> </td><td> </td></tr> <tr><td> </td><td> </td></tr> </table>                                                                                |            |  |           |  |         |  |           |  |  |  |
|            |                                                                                                              |                                                                                                                                                                                                                                                                                        |            |  |           |  |         |  |           |  |  |  |
|            |                                                                                                              |                                                                                                                                                                                                                                                                                        |            |  |           |  |         |  |           |  |  |  |
|            |                                                                                                              |                                                                                                                                                                                                                                                                                        |            |  |           |  |         |  |           |  |  |  |
| <b>8</b>   | Patents planned, issued or pending                                                                           | <input checked="" type="checkbox"/> <b>None</b><br><table border="1" data-bbox="437 1639 1011 1742"> <tr><td> </td><td> </td></tr> <tr><td> </td><td> </td></tr> <tr><td> </td><td> </td></tr> </table>                                                                                |            |  |           |  |         |  |           |  |  |  |
|            |                                                                                                              |                                                                                                                                                                                                                                                                                        |            |  |           |  |         |  |           |  |  |  |
|            |                                                                                                              |                                                                                                                                                                                                                                                                                        |            |  |           |  |         |  |           |  |  |  |
|            |                                                                                                              |                                                                                                                                                                                                                                                                                        |            |  |           |  |         |  |           |  |  |  |
| <b>9</b>   | Participation on a Data Safety Monitoring Board or Advisory Board                                            | <input checked="" type="checkbox"/> <b>None</b><br><table border="1" data-bbox="437 1863 1011 1966"> <tr><td> </td><td> </td></tr> <tr><td> </td><td> </td></tr> <tr><td> </td><td> </td></tr> </table>                                                                                |            |  |           |  |         |  |           |  |  |  |
|            |                                                                                                              |                                                                                                                                                                                                                                                                                        |            |  |           |  |         |  |           |  |  |  |
|            |                                                                                                              |                                                                                                                                                                                                                                                                                        |            |  |           |  |         |  |           |  |  |  |
|            |                                                                                                              |                                                                                                                                                                                                                                                                                        |            |  |           |  |         |  |           |  |  |  |

|           |                                                                                                   | Name all entities with whom you have this relationship or indicate none (add rows as needed) | Specifications/Comments (e.g., if payments were made to you or to your institution) |
|-----------|---------------------------------------------------------------------------------------------------|----------------------------------------------------------------------------------------------|-------------------------------------------------------------------------------------|
| <b>10</b> | Leadership or fiduciary role in other board, society, committee or advocacy group, paid or unpaid | <input checked="" type="checkbox"/> <b>None</b>                                              |                                                                                     |
|           |                                                                                                   |                                                                                              |                                                                                     |
|           |                                                                                                   |                                                                                              |                                                                                     |
|           |                                                                                                   |                                                                                              |                                                                                     |
| <b>11</b> | Stock or stock options                                                                            | <input checked="" type="checkbox"/> <b>None</b>                                              |                                                                                     |
|           |                                                                                                   |                                                                                              |                                                                                     |
|           |                                                                                                   |                                                                                              |                                                                                     |
|           |                                                                                                   |                                                                                              |                                                                                     |
| <b>12</b> | Receipt of equipment, materials, drugs, medical writing, gifts or other services                  | <input checked="" type="checkbox"/> <b>None</b>                                              |                                                                                     |
|           |                                                                                                   |                                                                                              |                                                                                     |
|           |                                                                                                   |                                                                                              |                                                                                     |
|           |                                                                                                   |                                                                                              |                                                                                     |
| <b>13</b> | Other financial or non-financial interests                                                        | <input checked="" type="checkbox"/> <b>None</b>                                              |                                                                                     |
|           |                                                                                                   |                                                                                              |                                                                                     |
|           |                                                                                                   |                                                                                              |                                                                                     |
|           |                                                                                                   |                                                                                              |                                                                                     |

**Please place an "X" next to the following statement to indicate your agreement:**

I certify that I have answered every question and have not altered the wording of any of the questions on this form.

## ICMJE DISCLOSURE FORM

**Date:** 9/15/2022

**Your Name:** Prof. Dr. Thomas Wiesmann

**Manuscript Title:** One-year follow-up of the CAPSID randomized trial for high-dose convalescent plasma in severe COVID-19 patients

**Manuscript Number (if known):** 163657-JCI-CMED-RV-2

In the interest of transparency, we ask you to disclose all relationships/activities/interests listed below that are related to the content of your manuscript. "Related" means any relation with for-profit or not-for-profit third parties whose interests may be affected by the content of the manuscript. Disclosure represents a commitment to transparency and does not necessarily indicate a bias. If you are in doubt about whether to list a relationship/activity/interest, it is preferable that you do so.

The author's relationships/activities/interests should be defined broadly. For example, if your manuscript pertains to the epidemiology of hypertension, you should declare all relationships with manufacturers of antihypertensive medication, even if that medication is not mentioned in the manuscript.

In item #1 below, report all support for the work reported in this manuscript without time limit. For all other items, the time frame for disclosure is the past 36 months.

|                                                                                                                                  | Name all entities with whom you have this relationship or indicate none (add rows as needed)                                                                                     | Specifications/Comments (e.g., if payments were made to you or to your institution)                                                                                                                                                                                                                                                                                                                                                                                                                                                                                                                                                                                                                                                                                                                                                             |                                                                                                                                  |                                                                                                                                                                                  |  |                                                                                                                      |  |                                                 |  |                                                                 |
|----------------------------------------------------------------------------------------------------------------------------------|----------------------------------------------------------------------------------------------------------------------------------------------------------------------------------|-------------------------------------------------------------------------------------------------------------------------------------------------------------------------------------------------------------------------------------------------------------------------------------------------------------------------------------------------------------------------------------------------------------------------------------------------------------------------------------------------------------------------------------------------------------------------------------------------------------------------------------------------------------------------------------------------------------------------------------------------------------------------------------------------------------------------------------------------|----------------------------------------------------------------------------------------------------------------------------------|----------------------------------------------------------------------------------------------------------------------------------------------------------------------------------|--|----------------------------------------------------------------------------------------------------------------------|--|-------------------------------------------------|--|-----------------------------------------------------------------|
| Time frame: Since the initial planning of the work                                                                               |                                                                                                                                                                                  |                                                                                                                                                                                                                                                                                                                                                                                                                                                                                                                                                                                                                                                                                                                                                                                                                                                 |                                                                                                                                  |                                                                                                                                                                                  |  |                                                                                                                      |  |                                                 |  |                                                                 |
| <b>1</b>                                                                                                                         | All support for the present manuscript (e.g., funding, provision of study materials, medical writing, article processing charges, etc.)<br><b>No time limit for this item.</b>   | <input type="checkbox"/> <b>None</b><br><br><table border="1" style="width: 100%; border-collapse: collapse;"> <tr> <td style="width: 60%;">General funding started in 01.04.2020 and ended 31.05.2022<br/><b>German Federal Ministry of Health funded the clinical trial</b></td> <td style="width: 40%;"><b>German Federal Ministry of Health funded the clinical trial. Expense reimbursement for patient treatment paid by the sponsor DRK Blutspendedienst Baden-Württemberg Hesse</b></td> </tr> <tr> <td></td> <td>up to 4400 € per patient treated within the first part of the trial<br/>2000 € set up fee for initiation of the trial</td> </tr> <tr> <td></td> <td>up to 885 € per patient in the follow up period</td> </tr> <tr> <td></td> <td>All paid to participating institution [not to the investigator]</td> </tr> </table> | General funding started in 01.04.2020 and ended 31.05.2022<br><b>German Federal Ministry of Health funded the clinical trial</b> | <b>German Federal Ministry of Health funded the clinical trial. Expense reimbursement for patient treatment paid by the sponsor DRK Blutspendedienst Baden-Württemberg Hesse</b> |  | up to 4400 € per patient treated within the first part of the trial<br>2000 € set up fee for initiation of the trial |  | up to 885 € per patient in the follow up period |  | All paid to participating institution [not to the investigator] |
| General funding started in 01.04.2020 and ended 31.05.2022<br><b>German Federal Ministry of Health funded the clinical trial</b> | <b>German Federal Ministry of Health funded the clinical trial. Expense reimbursement for patient treatment paid by the sponsor DRK Blutspendedienst Baden-Württemberg Hesse</b> |                                                                                                                                                                                                                                                                                                                                                                                                                                                                                                                                                                                                                                                                                                                                                                                                                                                 |                                                                                                                                  |                                                                                                                                                                                  |  |                                                                                                                      |  |                                                 |  |                                                                 |
|                                                                                                                                  | up to 4400 € per patient treated within the first part of the trial<br>2000 € set up fee for initiation of the trial                                                             |                                                                                                                                                                                                                                                                                                                                                                                                                                                                                                                                                                                                                                                                                                                                                                                                                                                 |                                                                                                                                  |                                                                                                                                                                                  |  |                                                                                                                      |  |                                                 |  |                                                                 |
|                                                                                                                                  | up to 885 € per patient in the follow up period                                                                                                                                  |                                                                                                                                                                                                                                                                                                                                                                                                                                                                                                                                                                                                                                                                                                                                                                                                                                                 |                                                                                                                                  |                                                                                                                                                                                  |  |                                                                                                                      |  |                                                 |  |                                                                 |
|                                                                                                                                  | All paid to participating institution [not to the investigator]                                                                                                                  |                                                                                                                                                                                                                                                                                                                                                                                                                                                                                                                                                                                                                                                                                                                                                                                                                                                 |                                                                                                                                  |                                                                                                                                                                                  |  |                                                                                                                      |  |                                                 |  |                                                                 |
| Time frame: past 36 months                                                                                                       |                                                                                                                                                                                  |                                                                                                                                                                                                                                                                                                                                                                                                                                                                                                                                                                                                                                                                                                                                                                                                                                                 |                                                                                                                                  |                                                                                                                                                                                  |  |                                                                                                                      |  |                                                 |  |                                                                 |
| <b>2</b>                                                                                                                         | Grants or contracts from any entity (if not indicated in item #1 above).                                                                                                         | <input checked="" type="checkbox"/> <b>None</b><br><br><table border="1" style="width: 100%; border-collapse: collapse;"> <tr><td style="width: 60%; height: 20px;"></td><td style="width: 40%;"></td></tr> <tr><td style="height: 20px;"></td><td></td></tr> <tr><td style="height: 20px;"></td><td></td></tr> </table>                                                                                                                                                                                                                                                                                                                                                                                                                                                                                                                        |                                                                                                                                  |                                                                                                                                                                                  |  |                                                                                                                      |  |                                                 |  |                                                                 |
|                                                                                                                                  |                                                                                                                                                                                  |                                                                                                                                                                                                                                                                                                                                                                                                                                                                                                                                                                                                                                                                                                                                                                                                                                                 |                                                                                                                                  |                                                                                                                                                                                  |  |                                                                                                                      |  |                                                 |  |                                                                 |
|                                                                                                                                  |                                                                                                                                                                                  |                                                                                                                                                                                                                                                                                                                                                                                                                                                                                                                                                                                                                                                                                                                                                                                                                                                 |                                                                                                                                  |                                                                                                                                                                                  |  |                                                                                                                      |  |                                                 |  |                                                                 |
|                                                                                                                                  |                                                                                                                                                                                  |                                                                                                                                                                                                                                                                                                                                                                                                                                                                                                                                                                                                                                                                                                                                                                                                                                                 |                                                                                                                                  |                                                                                                                                                                                  |  |                                                                                                                      |  |                                                 |  |                                                                 |

|   | Name all entities with whom you have this relationship or indicate none (add rows as needed)                 | Specifications/Comments (e.g., if payments were made to you or to your institution)                                                                                                               |  |  |  |  |  |  |
|---|--------------------------------------------------------------------------------------------------------------|---------------------------------------------------------------------------------------------------------------------------------------------------------------------------------------------------|--|--|--|--|--|--|
| 3 | Royalties or licenses                                                                                        | <input checked="" type="checkbox"/> <b>None</b><br><table border="1" data-bbox="437 383 1522 488"> <tr><td></td><td></td></tr> <tr><td></td><td></td></tr> <tr><td></td><td></td></tr> </table>   |  |  |  |  |  |  |
|   |                                                                                                              |                                                                                                                                                                                                   |  |  |  |  |  |  |
|   |                                                                                                              |                                                                                                                                                                                                   |  |  |  |  |  |  |
|   |                                                                                                              |                                                                                                                                                                                                   |  |  |  |  |  |  |
| 4 | Consulting fees                                                                                              | <input checked="" type="checkbox"/> <b>None</b><br><table border="1" data-bbox="437 629 1522 734"> <tr><td></td><td></td></tr> <tr><td></td><td></td></tr> <tr><td></td><td></td></tr> </table>   |  |  |  |  |  |  |
|   |                                                                                                              |                                                                                                                                                                                                   |  |  |  |  |  |  |
|   |                                                                                                              |                                                                                                                                                                                                   |  |  |  |  |  |  |
|   |                                                                                                              |                                                                                                                                                                                                   |  |  |  |  |  |  |
| 5 | Payment or honoraria for lectures, presentations, speakers bureaus, manuscript writing or educational events | <input checked="" type="checkbox"/> <b>None</b><br><table border="1" data-bbox="437 853 1522 958"> <tr><td></td><td></td></tr> <tr><td></td><td></td></tr> <tr><td></td><td></td></tr> </table>   |  |  |  |  |  |  |
|   |                                                                                                              |                                                                                                                                                                                                   |  |  |  |  |  |  |
|   |                                                                                                              |                                                                                                                                                                                                   |  |  |  |  |  |  |
|   |                                                                                                              |                                                                                                                                                                                                   |  |  |  |  |  |  |
| 6 | Payment for expert testimony                                                                                 | <input checked="" type="checkbox"/> <b>None</b><br><table border="1" data-bbox="437 1200 1522 1305"> <tr><td></td><td></td></tr> <tr><td></td><td></td></tr> <tr><td></td><td></td></tr> </table> |  |  |  |  |  |  |
|   |                                                                                                              |                                                                                                                                                                                                   |  |  |  |  |  |  |
|   |                                                                                                              |                                                                                                                                                                                                   |  |  |  |  |  |  |
|   |                                                                                                              |                                                                                                                                                                                                   |  |  |  |  |  |  |
| 7 | Support for attending meetings and/or travel                                                                 | <input checked="" type="checkbox"/> <b>None</b><br><table border="1" data-bbox="437 1413 1522 1518"> <tr><td></td><td></td></tr> <tr><td></td><td></td></tr> <tr><td></td><td></td></tr> </table> |  |  |  |  |  |  |
|   |                                                                                                              |                                                                                                                                                                                                   |  |  |  |  |  |  |
|   |                                                                                                              |                                                                                                                                                                                                   |  |  |  |  |  |  |
|   |                                                                                                              |                                                                                                                                                                                                   |  |  |  |  |  |  |
| 8 | Patents planned, issued or pending                                                                           | <input checked="" type="checkbox"/> <b>None</b><br><table border="1" data-bbox="437 1637 1522 1742"> <tr><td></td><td></td></tr> <tr><td></td><td></td></tr> <tr><td></td><td></td></tr> </table> |  |  |  |  |  |  |
|   |                                                                                                              |                                                                                                                                                                                                   |  |  |  |  |  |  |
|   |                                                                                                              |                                                                                                                                                                                                   |  |  |  |  |  |  |
|   |                                                                                                              |                                                                                                                                                                                                   |  |  |  |  |  |  |
| 9 | Participation on a Data Safety Monitoring Board or Advisory Board                                            | <input checked="" type="checkbox"/> <b>None</b><br><table border="1" data-bbox="437 1861 1522 1966"> <tr><td></td><td></td></tr> <tr><td></td><td></td></tr> <tr><td></td><td></td></tr> </table> |  |  |  |  |  |  |
|   |                                                                                                              |                                                                                                                                                                                                   |  |  |  |  |  |  |
|   |                                                                                                              |                                                                                                                                                                                                   |  |  |  |  |  |  |
|   |                                                                                                              |                                                                                                                                                                                                   |  |  |  |  |  |  |

|        |                                                                                                   | Name all entities with whom you have this relationship or indicate none (add rows as needed) | Specifications/Comments (e.g., if payments were made to you or to your institution)                                                                                                  |
|--------|---------------------------------------------------------------------------------------------------|----------------------------------------------------------------------------------------------|--------------------------------------------------------------------------------------------------------------------------------------------------------------------------------------|
| 1<br>0 | Leadership or fiduciary role in other board, society, committee or advocacy group, paid or unpaid | <input type="checkbox"/> None                                                                |                                                                                                                                                                                      |
|        |                                                                                                   | ESRA                                                                                         | ESRA (European Society of Regional Anesthesia and Pain Medicine): German Board Member (unpaid)                                                                                       |
|        |                                                                                                   | DGAI                                                                                         | DGAI (Dt. Gesellschaft f. Anästhesie & Intensivtherapie, German Society of Anesthesia & Intensive Care Medicine), Vice-Speaker of the Working Group on „Regional Anesthesia“(unpaid) |
| 1<br>1 | Stock or stock options                                                                            | <input checked="" type="checkbox"/> None                                                     |                                                                                                                                                                                      |
| 1<br>2 | Receipt of equipment, materials, drugs, medical writing, gifts or other services                  | <input checked="" type="checkbox"/> None                                                     |                                                                                                                                                                                      |
| 1<br>3 | Other financial or non-financial interests                                                        | <input checked="" type="checkbox"/> None                                                     |                                                                                                                                                                                      |

Please place an "X" next to the following statement to indicate your agreement:

I certify that I have answered every question and have not altered the wording of any of the questions on this form.

## ICMJE DISCLOSURE FORM

**Date:** 9/15/2022

**Your Name:** PD Dr. Thomas Thiele

**Manuscript Title:** One-year follow-up of the CAPSID randomized trial for high-dose convalescent plasma in severe COVID-19 patients

**Manuscript Number (if known):** 163657-JCI-CMED-RV-2

In the interest of transparency, we ask you to disclose all relationships/activities/interests listed below that are related to the content of your manuscript. "Related" means any relation with for-profit or not-for-profit third parties whose interests may be affected by the content of the manuscript. Disclosure represents a commitment to transparency and does not necessarily indicate a bias. If you are in doubt about whether to list a relationship/activity/interest, it is preferable that you do so.

The author's relationships/activities/interests should be defined broadly. For example, if your manuscript pertains to the epidemiology of hypertension, you should declare all relationships with manufacturers of antihypertensive medication, even if that medication is not mentioned in the manuscript.

In item #1 below, report all support for the work reported in this manuscript without time limit. For all other items, the time frame for disclosure is the past 36 months.

|                                                                                                                                  | Name all entities with whom you have this relationship or indicate none (add rows as needed)                                                                                     | Specifications/Comments (e.g., if payments were made to you or to your institution)                                                                                                                                                                                                                                                                                                                                                                                                                                                                                                                                                                                                                                                                                                                                                             |                                                                                                                                  |                                                                                                                                                                                  |  |                                                                                                                      |  |                                                 |  |                                                                 |
|----------------------------------------------------------------------------------------------------------------------------------|----------------------------------------------------------------------------------------------------------------------------------------------------------------------------------|-------------------------------------------------------------------------------------------------------------------------------------------------------------------------------------------------------------------------------------------------------------------------------------------------------------------------------------------------------------------------------------------------------------------------------------------------------------------------------------------------------------------------------------------------------------------------------------------------------------------------------------------------------------------------------------------------------------------------------------------------------------------------------------------------------------------------------------------------|----------------------------------------------------------------------------------------------------------------------------------|----------------------------------------------------------------------------------------------------------------------------------------------------------------------------------|--|----------------------------------------------------------------------------------------------------------------------|--|-------------------------------------------------|--|-----------------------------------------------------------------|
| Time frame: Since the initial planning of the work                                                                               |                                                                                                                                                                                  |                                                                                                                                                                                                                                                                                                                                                                                                                                                                                                                                                                                                                                                                                                                                                                                                                                                 |                                                                                                                                  |                                                                                                                                                                                  |  |                                                                                                                      |  |                                                 |  |                                                                 |
| <b>1</b>                                                                                                                         | All support for the present manuscript (e.g., funding, provision of study materials, medical writing, article processing charges, etc.)<br><b>No time limit for this item.</b>   | <input type="checkbox"/> <b>None</b><br><br><table border="1" style="width: 100%; border-collapse: collapse;"> <tr> <td style="width: 60%;">General funding started in 01.04.2020 and ended 31.05.2022<br/><b>German Federal Ministry of Health funded the clinical trial</b></td> <td style="width: 40%;"><b>German Federal Ministry of Health funded the clinical trial. Expense reimbursement for patient treatment paid by the sponsor DRK Blutspendedienst Baden-Württemberg Hesse</b></td> </tr> <tr> <td></td> <td>up to 4400 € per patient treated within the first part of the trial<br/>2000 € set up fee for initiation of the trial</td> </tr> <tr> <td></td> <td>up to 885 € per patient in the follow up period</td> </tr> <tr> <td></td> <td>All paid to participating institution [not to the investigator]</td> </tr> </table> | General funding started in 01.04.2020 and ended 31.05.2022<br><b>German Federal Ministry of Health funded the clinical trial</b> | <b>German Federal Ministry of Health funded the clinical trial. Expense reimbursement for patient treatment paid by the sponsor DRK Blutspendedienst Baden-Württemberg Hesse</b> |  | up to 4400 € per patient treated within the first part of the trial<br>2000 € set up fee for initiation of the trial |  | up to 885 € per patient in the follow up period |  | All paid to participating institution [not to the investigator] |
| General funding started in 01.04.2020 and ended 31.05.2022<br><b>German Federal Ministry of Health funded the clinical trial</b> | <b>German Federal Ministry of Health funded the clinical trial. Expense reimbursement for patient treatment paid by the sponsor DRK Blutspendedienst Baden-Württemberg Hesse</b> |                                                                                                                                                                                                                                                                                                                                                                                                                                                                                                                                                                                                                                                                                                                                                                                                                                                 |                                                                                                                                  |                                                                                                                                                                                  |  |                                                                                                                      |  |                                                 |  |                                                                 |
|                                                                                                                                  | up to 4400 € per patient treated within the first part of the trial<br>2000 € set up fee for initiation of the trial                                                             |                                                                                                                                                                                                                                                                                                                                                                                                                                                                                                                                                                                                                                                                                                                                                                                                                                                 |                                                                                                                                  |                                                                                                                                                                                  |  |                                                                                                                      |  |                                                 |  |                                                                 |
|                                                                                                                                  | up to 885 € per patient in the follow up period                                                                                                                                  |                                                                                                                                                                                                                                                                                                                                                                                                                                                                                                                                                                                                                                                                                                                                                                                                                                                 |                                                                                                                                  |                                                                                                                                                                                  |  |                                                                                                                      |  |                                                 |  |                                                                 |
|                                                                                                                                  | All paid to participating institution [not to the investigator]                                                                                                                  |                                                                                                                                                                                                                                                                                                                                                                                                                                                                                                                                                                                                                                                                                                                                                                                                                                                 |                                                                                                                                  |                                                                                                                                                                                  |  |                                                                                                                      |  |                                                 |  |                                                                 |
| Time frame: past 36 months                                                                                                       |                                                                                                                                                                                  |                                                                                                                                                                                                                                                                                                                                                                                                                                                                                                                                                                                                                                                                                                                                                                                                                                                 |                                                                                                                                  |                                                                                                                                                                                  |  |                                                                                                                      |  |                                                 |  |                                                                 |
| <b>2</b>                                                                                                                         | Grants or contracts from any entity (if not indicated in item #1 above).                                                                                                         | <input checked="" type="checkbox"/> <b>None</b><br><br><table border="1" style="width: 100%; border-collapse: collapse;"> <tr><td style="width: 60%; height: 20px;"></td><td style="width: 40%;"></td></tr> <tr><td style="height: 20px;"></td><td></td></tr> <tr><td style="height: 20px;"></td><td></td></tr> </table>                                                                                                                                                                                                                                                                                                                                                                                                                                                                                                                        |                                                                                                                                  |                                                                                                                                                                                  |  |                                                                                                                      |  |                                                 |  |                                                                 |
|                                                                                                                                  |                                                                                                                                                                                  |                                                                                                                                                                                                                                                                                                                                                                                                                                                                                                                                                                                                                                                                                                                                                                                                                                                 |                                                                                                                                  |                                                                                                                                                                                  |  |                                                                                                                      |  |                                                 |  |                                                                 |
|                                                                                                                                  |                                                                                                                                                                                  |                                                                                                                                                                                                                                                                                                                                                                                                                                                                                                                                                                                                                                                                                                                                                                                                                                                 |                                                                                                                                  |                                                                                                                                                                                  |  |                                                                                                                      |  |                                                 |  |                                                                 |
|                                                                                                                                  |                                                                                                                                                                                  |                                                                                                                                                                                                                                                                                                                                                                                                                                                                                                                                                                                                                                                                                                                                                                                                                                                 |                                                                                                                                  |                                                                                                                                                                                  |  |                                                                                                                      |  |                                                 |  |                                                                 |



|          | Name all entities with whom you have this relationship or indicate none (add rows as needed)                 | Specifications/Comments (e.g., if payments were made to you or to your institution)                                                                                                               |  |  |  |  |  |  |
|----------|--------------------------------------------------------------------------------------------------------------|---------------------------------------------------------------------------------------------------------------------------------------------------------------------------------------------------|--|--|--|--|--|--|
| <b>3</b> | Royalties or licenses                                                                                        | <input checked="" type="checkbox"/> <b>None</b><br><table border="1" data-bbox="437 383 1522 488"> <tr><td></td><td></td></tr> <tr><td></td><td></td></tr> <tr><td></td><td></td></tr> </table>   |  |  |  |  |  |  |
|          |                                                                                                              |                                                                                                                                                                                                   |  |  |  |  |  |  |
|          |                                                                                                              |                                                                                                                                                                                                   |  |  |  |  |  |  |
|          |                                                                                                              |                                                                                                                                                                                                   |  |  |  |  |  |  |
| <b>4</b> | Consulting fees                                                                                              | <input checked="" type="checkbox"/> <b>None</b><br><table border="1" data-bbox="437 629 1522 734"> <tr><td></td><td></td></tr> <tr><td></td><td></td></tr> <tr><td></td><td></td></tr> </table>   |  |  |  |  |  |  |
|          |                                                                                                              |                                                                                                                                                                                                   |  |  |  |  |  |  |
|          |                                                                                                              |                                                                                                                                                                                                   |  |  |  |  |  |  |
|          |                                                                                                              |                                                                                                                                                                                                   |  |  |  |  |  |  |
| <b>5</b> | Payment or honoraria for lectures, presentations, speakers bureaus, manuscript writing or educational events | <input checked="" type="checkbox"/> <b>None</b><br><table border="1" data-bbox="437 853 1522 958"> <tr><td></td><td></td></tr> <tr><td></td><td></td></tr> <tr><td></td><td></td></tr> </table>   |  |  |  |  |  |  |
|          |                                                                                                              |                                                                                                                                                                                                   |  |  |  |  |  |  |
|          |                                                                                                              |                                                                                                                                                                                                   |  |  |  |  |  |  |
|          |                                                                                                              |                                                                                                                                                                                                   |  |  |  |  |  |  |
| <b>6</b> | Payment for expert testimony                                                                                 | <input checked="" type="checkbox"/> <b>None</b><br><table border="1" data-bbox="437 1200 1522 1305"> <tr><td></td><td></td></tr> <tr><td></td><td></td></tr> <tr><td></td><td></td></tr> </table> |  |  |  |  |  |  |
|          |                                                                                                              |                                                                                                                                                                                                   |  |  |  |  |  |  |
|          |                                                                                                              |                                                                                                                                                                                                   |  |  |  |  |  |  |
|          |                                                                                                              |                                                                                                                                                                                                   |  |  |  |  |  |  |
| <b>7</b> | Support for attending meetings and/or travel                                                                 | <input checked="" type="checkbox"/> <b>None</b><br><table border="1" data-bbox="437 1413 1522 1518"> <tr><td></td><td></td></tr> <tr><td></td><td></td></tr> <tr><td></td><td></td></tr> </table> |  |  |  |  |  |  |
|          |                                                                                                              |                                                                                                                                                                                                   |  |  |  |  |  |  |
|          |                                                                                                              |                                                                                                                                                                                                   |  |  |  |  |  |  |
|          |                                                                                                              |                                                                                                                                                                                                   |  |  |  |  |  |  |
| <b>8</b> | Patents planned, issued or pending                                                                           | <input checked="" type="checkbox"/> <b>None</b><br><table border="1" data-bbox="437 1637 1522 1742"> <tr><td></td><td></td></tr> <tr><td></td><td></td></tr> <tr><td></td><td></td></tr> </table> |  |  |  |  |  |  |
|          |                                                                                                              |                                                                                                                                                                                                   |  |  |  |  |  |  |
|          |                                                                                                              |                                                                                                                                                                                                   |  |  |  |  |  |  |
|          |                                                                                                              |                                                                                                                                                                                                   |  |  |  |  |  |  |
| <b>9</b> | Participation on a Data Safety Monitoring Board or Advisory Board                                            | <input checked="" type="checkbox"/> <b>None</b><br><table border="1" data-bbox="437 1861 1522 1966"> <tr><td></td><td></td></tr> <tr><td></td><td></td></tr> <tr><td></td><td></td></tr> </table> |  |  |  |  |  |  |
|          |                                                                                                              |                                                                                                                                                                                                   |  |  |  |  |  |  |
|          |                                                                                                              |                                                                                                                                                                                                   |  |  |  |  |  |  |
|          |                                                                                                              |                                                                                                                                                                                                   |  |  |  |  |  |  |

|        |                                                                                                   | Name all entities with whom you have this relationship or indicate none (add rows as needed) | Specifications/Comments (e.g., if payments were made to you or to your institution) |
|--------|---------------------------------------------------------------------------------------------------|----------------------------------------------------------------------------------------------|-------------------------------------------------------------------------------------|
| 1<br>0 | Leadership or fiduciary role in other board, society, committee or advocacy group, paid or unpaid | <input checked="" type="checkbox"/> None                                                     |                                                                                     |
|        |                                                                                                   |                                                                                              |                                                                                     |
|        |                                                                                                   |                                                                                              |                                                                                     |
|        |                                                                                                   |                                                                                              |                                                                                     |
| 1<br>1 | Stock or stock options                                                                            | <input checked="" type="checkbox"/> None                                                     |                                                                                     |
|        |                                                                                                   |                                                                                              |                                                                                     |
|        |                                                                                                   |                                                                                              |                                                                                     |
|        |                                                                                                   |                                                                                              |                                                                                     |
| 1<br>2 | Receipt of equipment, materials, drugs, medical writing, gifts or other services                  | <input checked="" type="checkbox"/> None                                                     |                                                                                     |
|        |                                                                                                   |                                                                                              |                                                                                     |
|        |                                                                                                   |                                                                                              |                                                                                     |
|        |                                                                                                   |                                                                                              |                                                                                     |
| 1<br>3 | Other financial or non-financial interests                                                        | <input checked="" type="checkbox"/> None                                                     |                                                                                     |
|        |                                                                                                   |                                                                                              |                                                                                     |
|        |                                                                                                   |                                                                                              |                                                                                     |
|        |                                                                                                   |                                                                                              |                                                                                     |

Please place an "X" next to the following statement to indicate your agreement:

I certify that I have answered every question and have not altered the wording of any of the questions on this form.

## ICMJE DISCLOSURE FORM

**Date:** 9/15/2022

**Your Name:** Prof. Dr. Peter Spieth

**Manuscript Title:** One-year follow-up of the CAPSID randomized trial for high-dose convalescent plasma in severe COVID-19 patients

**Manuscript Number (if known):** 163657-JCI-CMED-RV-2

In the interest of transparency, we ask you to disclose all relationships/activities/interests listed below that are related to the content of your manuscript. "Related" means any relation with for-profit or not-for-profit third parties whose interests may be affected by the content of the manuscript. Disclosure represents a commitment to transparency and does not necessarily indicate a bias. If you are in doubt about whether to list a relationship/activity/interest, it is preferable that you do so.

The author's relationships/activities/interests should be defined broadly. For example, if your manuscript pertains to the epidemiology of hypertension, you should declare all relationships with manufacturers of antihypertensive medication, even if that medication is not mentioned in the manuscript.

In item #1 below, report all support for the work reported in this manuscript without time limit. For all other items, the time frame for disclosure is the past 36 months.

|                                                                                                                                  | Name all entities with whom you have this relationship or indicate none (add rows as needed)                                                                                       | Specifications/Comments (e.g., if payments were made to you or to your institution)                                                                                                                                                                                                                                                                                                                                                                                                                                                                                                                                                                                                                                                                                                                                                               |                                                                                                                                  |                                                                                                                                                                                    |  |                                                                                                                      |  |                                                 |  |                                                                 |
|----------------------------------------------------------------------------------------------------------------------------------|------------------------------------------------------------------------------------------------------------------------------------------------------------------------------------|---------------------------------------------------------------------------------------------------------------------------------------------------------------------------------------------------------------------------------------------------------------------------------------------------------------------------------------------------------------------------------------------------------------------------------------------------------------------------------------------------------------------------------------------------------------------------------------------------------------------------------------------------------------------------------------------------------------------------------------------------------------------------------------------------------------------------------------------------|----------------------------------------------------------------------------------------------------------------------------------|------------------------------------------------------------------------------------------------------------------------------------------------------------------------------------|--|----------------------------------------------------------------------------------------------------------------------|--|-------------------------------------------------|--|-----------------------------------------------------------------|
| Time frame: Since the initial planning of the work                                                                               |                                                                                                                                                                                    |                                                                                                                                                                                                                                                                                                                                                                                                                                                                                                                                                                                                                                                                                                                                                                                                                                                   |                                                                                                                                  |                                                                                                                                                                                    |  |                                                                                                                      |  |                                                 |  |                                                                 |
| <b>1</b>                                                                                                                         | All support for the present manuscript (e.g., funding, provision of study materials, medical writing, article processing charges, etc.)<br><b>No time limit for this item.</b>     | <input type="checkbox"/> <b>None</b><br><br><table border="1" style="width: 100%; border-collapse: collapse;"> <tr> <td style="width: 60%;">General funding started in 01.04.2020 and ended 31.05.2022<br/><b>German Federal Ministry of Health funded the clinical trial</b></td> <td style="width: 40%;"><b>German Federal Ministry of Health funded the clinical trial. Expense reimbursement for patient treatment paid by the sponsor DRK Blutspendedienst Baden-Württemberg Hessen.</b></td> </tr> <tr> <td></td> <td>up to 4400 € per patient treated within the first part of the trial<br/>2000 € set up fee for initiation of the trial</td> </tr> <tr> <td></td> <td>up to 885 € per patient in the follow up period</td> </tr> <tr> <td></td> <td>All paid to participating institution [not to the investigator]</td> </tr> </table> | General funding started in 01.04.2020 and ended 31.05.2022<br><b>German Federal Ministry of Health funded the clinical trial</b> | <b>German Federal Ministry of Health funded the clinical trial. Expense reimbursement for patient treatment paid by the sponsor DRK Blutspendedienst Baden-Württemberg Hessen.</b> |  | up to 4400 € per patient treated within the first part of the trial<br>2000 € set up fee for initiation of the trial |  | up to 885 € per patient in the follow up period |  | All paid to participating institution [not to the investigator] |
| General funding started in 01.04.2020 and ended 31.05.2022<br><b>German Federal Ministry of Health funded the clinical trial</b> | <b>German Federal Ministry of Health funded the clinical trial. Expense reimbursement for patient treatment paid by the sponsor DRK Blutspendedienst Baden-Württemberg Hessen.</b> |                                                                                                                                                                                                                                                                                                                                                                                                                                                                                                                                                                                                                                                                                                                                                                                                                                                   |                                                                                                                                  |                                                                                                                                                                                    |  |                                                                                                                      |  |                                                 |  |                                                                 |
|                                                                                                                                  | up to 4400 € per patient treated within the first part of the trial<br>2000 € set up fee for initiation of the trial                                                               |                                                                                                                                                                                                                                                                                                                                                                                                                                                                                                                                                                                                                                                                                                                                                                                                                                                   |                                                                                                                                  |                                                                                                                                                                                    |  |                                                                                                                      |  |                                                 |  |                                                                 |
|                                                                                                                                  | up to 885 € per patient in the follow up period                                                                                                                                    |                                                                                                                                                                                                                                                                                                                                                                                                                                                                                                                                                                                                                                                                                                                                                                                                                                                   |                                                                                                                                  |                                                                                                                                                                                    |  |                                                                                                                      |  |                                                 |  |                                                                 |
|                                                                                                                                  | All paid to participating institution [not to the investigator]                                                                                                                    |                                                                                                                                                                                                                                                                                                                                                                                                                                                                                                                                                                                                                                                                                                                                                                                                                                                   |                                                                                                                                  |                                                                                                                                                                                    |  |                                                                                                                      |  |                                                 |  |                                                                 |
| Time frame: past 36 months                                                                                                       |                                                                                                                                                                                    |                                                                                                                                                                                                                                                                                                                                                                                                                                                                                                                                                                                                                                                                                                                                                                                                                                                   |                                                                                                                                  |                                                                                                                                                                                    |  |                                                                                                                      |  |                                                 |  |                                                                 |
| <b>2</b>                                                                                                                         | Grants or contracts from any entity (if not indicated in item #1 above).                                                                                                           | <input checked="" type="checkbox"/> <b>None</b><br><br><table border="1" style="width: 100%; border-collapse: collapse;"> <tr><td style="width: 60%; height: 20px;"></td><td style="width: 40%;"></td></tr> <tr><td style="height: 20px;"></td><td></td></tr> <tr><td style="height: 20px;"></td><td></td></tr> </table>                                                                                                                                                                                                                                                                                                                                                                                                                                                                                                                          |                                                                                                                                  |                                                                                                                                                                                    |  |                                                                                                                      |  |                                                 |  |                                                                 |
|                                                                                                                                  |                                                                                                                                                                                    |                                                                                                                                                                                                                                                                                                                                                                                                                                                                                                                                                                                                                                                                                                                                                                                                                                                   |                                                                                                                                  |                                                                                                                                                                                    |  |                                                                                                                      |  |                                                 |  |                                                                 |
|                                                                                                                                  |                                                                                                                                                                                    |                                                                                                                                                                                                                                                                                                                                                                                                                                                                                                                                                                                                                                                                                                                                                                                                                                                   |                                                                                                                                  |                                                                                                                                                                                    |  |                                                                                                                      |  |                                                 |  |                                                                 |
|                                                                                                                                  |                                                                                                                                                                                    |                                                                                                                                                                                                                                                                                                                                                                                                                                                                                                                                                                                                                                                                                                                                                                                                                                                   |                                                                                                                                  |                                                                                                                                                                                    |  |                                                                                                                      |  |                                                 |  |                                                                 |

|          | Name all entities with whom you have this relationship or indicate none (add rows as needed)                 | Specifications/Comments (e.g., if payments were made to you or to your institution)                                                                                                               |  |  |  |  |  |  |
|----------|--------------------------------------------------------------------------------------------------------------|---------------------------------------------------------------------------------------------------------------------------------------------------------------------------------------------------|--|--|--|--|--|--|
| <b>3</b> | Royalties or licenses                                                                                        | <input checked="" type="checkbox"/> <b>None</b><br><table border="1" data-bbox="437 385 1538 488"> <tr><td></td><td></td></tr> <tr><td></td><td></td></tr> <tr><td></td><td></td></tr> </table>   |  |  |  |  |  |  |
|          |                                                                                                              |                                                                                                                                                                                                   |  |  |  |  |  |  |
|          |                                                                                                              |                                                                                                                                                                                                   |  |  |  |  |  |  |
|          |                                                                                                              |                                                                                                                                                                                                   |  |  |  |  |  |  |
| <b>4</b> | Consulting fees                                                                                              | <input checked="" type="checkbox"/> <b>None</b><br><table border="1" data-bbox="437 631 1538 734"> <tr><td></td><td></td></tr> <tr><td></td><td></td></tr> <tr><td></td><td></td></tr> </table>   |  |  |  |  |  |  |
|          |                                                                                                              |                                                                                                                                                                                                   |  |  |  |  |  |  |
|          |                                                                                                              |                                                                                                                                                                                                   |  |  |  |  |  |  |
|          |                                                                                                              |                                                                                                                                                                                                   |  |  |  |  |  |  |
| <b>5</b> | Payment or honoraria for lectures, presentations, speakers bureaus, manuscript writing or educational events | <input checked="" type="checkbox"/> <b>None</b><br><table border="1" data-bbox="437 855 1538 958"> <tr><td></td><td></td></tr> <tr><td></td><td></td></tr> <tr><td></td><td></td></tr> </table>   |  |  |  |  |  |  |
|          |                                                                                                              |                                                                                                                                                                                                   |  |  |  |  |  |  |
|          |                                                                                                              |                                                                                                                                                                                                   |  |  |  |  |  |  |
|          |                                                                                                              |                                                                                                                                                                                                   |  |  |  |  |  |  |
| <b>6</b> | Payment for expert testimony                                                                                 | <input checked="" type="checkbox"/> <b>None</b><br><table border="1" data-bbox="437 1200 1538 1303"> <tr><td></td><td></td></tr> <tr><td></td><td></td></tr> <tr><td></td><td></td></tr> </table> |  |  |  |  |  |  |
|          |                                                                                                              |                                                                                                                                                                                                   |  |  |  |  |  |  |
|          |                                                                                                              |                                                                                                                                                                                                   |  |  |  |  |  |  |
|          |                                                                                                              |                                                                                                                                                                                                   |  |  |  |  |  |  |
| <b>7</b> | Support for attending meetings and/or travel                                                                 | <input checked="" type="checkbox"/> <b>None</b><br><table border="1" data-bbox="437 1415 1538 1518"> <tr><td></td><td></td></tr> <tr><td></td><td></td></tr> <tr><td></td><td></td></tr> </table> |  |  |  |  |  |  |
|          |                                                                                                              |                                                                                                                                                                                                   |  |  |  |  |  |  |
|          |                                                                                                              |                                                                                                                                                                                                   |  |  |  |  |  |  |
|          |                                                                                                              |                                                                                                                                                                                                   |  |  |  |  |  |  |
| <b>8</b> | Patents planned, issued or pending                                                                           | <input checked="" type="checkbox"/> <b>None</b><br><table border="1" data-bbox="437 1639 1538 1742"> <tr><td></td><td></td></tr> <tr><td></td><td></td></tr> <tr><td></td><td></td></tr> </table> |  |  |  |  |  |  |
|          |                                                                                                              |                                                                                                                                                                                                   |  |  |  |  |  |  |
|          |                                                                                                              |                                                                                                                                                                                                   |  |  |  |  |  |  |
|          |                                                                                                              |                                                                                                                                                                                                   |  |  |  |  |  |  |
| <b>9</b> | Participation on a Data Safety Monitoring Board or Advisory Board                                            | <input checked="" type="checkbox"/> <b>None</b><br><table border="1" data-bbox="437 1863 1538 1966"> <tr><td></td><td></td></tr> <tr><td></td><td></td></tr> <tr><td></td><td></td></tr> </table> |  |  |  |  |  |  |
|          |                                                                                                              |                                                                                                                                                                                                   |  |  |  |  |  |  |
|          |                                                                                                              |                                                                                                                                                                                                   |  |  |  |  |  |  |
|          |                                                                                                              |                                                                                                                                                                                                   |  |  |  |  |  |  |

|           | Name all entities with whom you have this relationship or indicate none (add rows as needed)      | Specifications/Comments (e.g., if payments were made to you or to your institution)                                                                                |  |  |  |  |  |  |
|-----------|---------------------------------------------------------------------------------------------------|--------------------------------------------------------------------------------------------------------------------------------------------------------------------|--|--|--|--|--|--|
| <b>10</b> | Leadership or fiduciary role in other board, society, committee or advocacy group, paid or unpaid | <input checked="" type="checkbox"/> <b>None</b><br><table border="1"> <tr><td></td><td></td></tr> <tr><td></td><td></td></tr> <tr><td></td><td></td></tr> </table> |  |  |  |  |  |  |
|           |                                                                                                   |                                                                                                                                                                    |  |  |  |  |  |  |
|           |                                                                                                   |                                                                                                                                                                    |  |  |  |  |  |  |
|           |                                                                                                   |                                                                                                                                                                    |  |  |  |  |  |  |
| <b>11</b> | Stock or stock options                                                                            | <input checked="" type="checkbox"/> <b>None</b><br><table border="1"> <tr><td></td><td></td></tr> <tr><td></td><td></td></tr> <tr><td></td><td></td></tr> </table> |  |  |  |  |  |  |
|           |                                                                                                   |                                                                                                                                                                    |  |  |  |  |  |  |
|           |                                                                                                   |                                                                                                                                                                    |  |  |  |  |  |  |
|           |                                                                                                   |                                                                                                                                                                    |  |  |  |  |  |  |
| <b>12</b> | Receipt of equipment, materials, drugs, medical writing, gifts or other services                  | <input checked="" type="checkbox"/> <b>None</b><br><table border="1"> <tr><td></td><td></td></tr> <tr><td></td><td></td></tr> <tr><td></td><td></td></tr> </table> |  |  |  |  |  |  |
|           |                                                                                                   |                                                                                                                                                                    |  |  |  |  |  |  |
|           |                                                                                                   |                                                                                                                                                                    |  |  |  |  |  |  |
|           |                                                                                                   |                                                                                                                                                                    |  |  |  |  |  |  |
| <b>13</b> | Other financial or non-financial interests                                                        | <input checked="" type="checkbox"/> <b>None</b><br><table border="1"> <tr><td></td><td></td></tr> <tr><td></td><td></td></tr> <tr><td></td><td></td></tr> </table> |  |  |  |  |  |  |
|           |                                                                                                   |                                                                                                                                                                    |  |  |  |  |  |  |
|           |                                                                                                   |                                                                                                                                                                    |  |  |  |  |  |  |
|           |                                                                                                   |                                                                                                                                                                    |  |  |  |  |  |  |

Please place an "X" next to the following statement to indicate your agreement:

I certify that I have answered every question and have not altered the wording of any of the questions on this form.

## ICMJE DISCLOSURE FORM

**Date:** 9/15/2022

**Your Name:** Prof. Dr. Peter Rosenberger

**Manuscript Title:** One-year follow-up of the CAPSID randomized trial for high-dose convalescent plasma in severe COVID-19 patients

**Manuscript Number (if known):** 163657-JCI-CMED-RV-2

In the interest of transparency, we ask you to disclose all relationships/activities/interests listed below that are related to the content of your manuscript. "Related" means any relation with for-profit or not-for-profit third parties whose interests may be affected by the content of the manuscript. Disclosure represents a commitment to transparency and does not necessarily indicate a bias. If you are in doubt about whether to list a relationship/activity/interest, it is preferable that you do so.

The author's relationships/activities/interests should be defined broadly. For example, if your manuscript pertains to the epidemiology of hypertension, you should declare all relationships with manufacturers of antihypertensive medication, even if that medication is not mentioned in the manuscript.

In item #1 below, report all support for the work reported in this manuscript without time limit. For all other items, the time frame for disclosure is the past 36 months.

|                                                                                                                                  | Name all entities with whom you have this relationship or indicate none (add rows as needed)                                                                                       | Specifications/Comments (e.g., if payments were made to you or to your institution)                                                                                                                                                                                                                                                                                                                                                                                                                                                                                                                                                                                                                                                                                                                                                                          |                                                                                                                                  |                                                                                                                                                                                    |  |                                                                                                                      |  |                                                 |  |                                                                 |
|----------------------------------------------------------------------------------------------------------------------------------|------------------------------------------------------------------------------------------------------------------------------------------------------------------------------------|--------------------------------------------------------------------------------------------------------------------------------------------------------------------------------------------------------------------------------------------------------------------------------------------------------------------------------------------------------------------------------------------------------------------------------------------------------------------------------------------------------------------------------------------------------------------------------------------------------------------------------------------------------------------------------------------------------------------------------------------------------------------------------------------------------------------------------------------------------------|----------------------------------------------------------------------------------------------------------------------------------|------------------------------------------------------------------------------------------------------------------------------------------------------------------------------------|--|----------------------------------------------------------------------------------------------------------------------|--|-------------------------------------------------|--|-----------------------------------------------------------------|
| Time frame: Since the initial planning of the work                                                                               |                                                                                                                                                                                    |                                                                                                                                                                                                                                                                                                                                                                                                                                                                                                                                                                                                                                                                                                                                                                                                                                                              |                                                                                                                                  |                                                                                                                                                                                    |  |                                                                                                                      |  |                                                 |  |                                                                 |
| <b>1</b>                                                                                                                         | All support for the present manuscript (e.g., funding, provision of study materials, medical writing, article processing charges, etc.)<br><b>No time limit for this item.</b>     | <input checked="" type="checkbox"/> <b>None</b><br><br><table border="1" style="width: 100%; border-collapse: collapse;"> <tr> <td style="width: 60%;">General funding started in 01.04.2020 and ended 31.05.2022<br/><b>German Federal Ministry of Health funded the clinical trial</b></td> <td style="width: 40%;"><b>German Federal Ministry of Health funded the clinical trial. Expense reimbursement for patient treatment paid by the sponsor DRK Blutspendedienst Baden-Württemberg Hessen.</b></td> </tr> <tr> <td></td> <td>up to 4400 € per patient treated within the first part of the trial<br/>2000 € set up fee for initiation of the trial</td> </tr> <tr> <td></td> <td>up to 885 € per patient in the follow up period</td> </tr> <tr> <td></td> <td>All paid to participating institution [not to the investigator]</td> </tr> </table> | General funding started in 01.04.2020 and ended 31.05.2022<br><b>German Federal Ministry of Health funded the clinical trial</b> | <b>German Federal Ministry of Health funded the clinical trial. Expense reimbursement for patient treatment paid by the sponsor DRK Blutspendedienst Baden-Württemberg Hessen.</b> |  | up to 4400 € per patient treated within the first part of the trial<br>2000 € set up fee for initiation of the trial |  | up to 885 € per patient in the follow up period |  | All paid to participating institution [not to the investigator] |
| General funding started in 01.04.2020 and ended 31.05.2022<br><b>German Federal Ministry of Health funded the clinical trial</b> | <b>German Federal Ministry of Health funded the clinical trial. Expense reimbursement for patient treatment paid by the sponsor DRK Blutspendedienst Baden-Württemberg Hessen.</b> |                                                                                                                                                                                                                                                                                                                                                                                                                                                                                                                                                                                                                                                                                                                                                                                                                                                              |                                                                                                                                  |                                                                                                                                                                                    |  |                                                                                                                      |  |                                                 |  |                                                                 |
|                                                                                                                                  | up to 4400 € per patient treated within the first part of the trial<br>2000 € set up fee for initiation of the trial                                                               |                                                                                                                                                                                                                                                                                                                                                                                                                                                                                                                                                                                                                                                                                                                                                                                                                                                              |                                                                                                                                  |                                                                                                                                                                                    |  |                                                                                                                      |  |                                                 |  |                                                                 |
|                                                                                                                                  | up to 885 € per patient in the follow up period                                                                                                                                    |                                                                                                                                                                                                                                                                                                                                                                                                                                                                                                                                                                                                                                                                                                                                                                                                                                                              |                                                                                                                                  |                                                                                                                                                                                    |  |                                                                                                                      |  |                                                 |  |                                                                 |
|                                                                                                                                  | All paid to participating institution [not to the investigator]                                                                                                                    |                                                                                                                                                                                                                                                                                                                                                                                                                                                                                                                                                                                                                                                                                                                                                                                                                                                              |                                                                                                                                  |                                                                                                                                                                                    |  |                                                                                                                      |  |                                                 |  |                                                                 |
| Time frame: past 36 months                                                                                                       |                                                                                                                                                                                    |                                                                                                                                                                                                                                                                                                                                                                                                                                                                                                                                                                                                                                                                                                                                                                                                                                                              |                                                                                                                                  |                                                                                                                                                                                    |  |                                                                                                                      |  |                                                 |  |                                                                 |
| <b>2</b>                                                                                                                         | Grants or contracts from any entity (if not indicated in item #1 above).                                                                                                           | <input checked="" type="checkbox"/> <b>None</b><br><br><table border="1" style="width: 100%; border-collapse: collapse;"> <tr><td style="width: 60%; height: 20px;"></td><td style="width: 40%;"></td></tr> <tr><td style="height: 20px;"></td><td></td></tr> <tr><td style="height: 20px;"></td><td></td></tr> </table>                                                                                                                                                                                                                                                                                                                                                                                                                                                                                                                                     |                                                                                                                                  |                                                                                                                                                                                    |  |                                                                                                                      |  |                                                 |  |                                                                 |
|                                                                                                                                  |                                                                                                                                                                                    |                                                                                                                                                                                                                                                                                                                                                                                                                                                                                                                                                                                                                                                                                                                                                                                                                                                              |                                                                                                                                  |                                                                                                                                                                                    |  |                                                                                                                      |  |                                                 |  |                                                                 |
|                                                                                                                                  |                                                                                                                                                                                    |                                                                                                                                                                                                                                                                                                                                                                                                                                                                                                                                                                                                                                                                                                                                                                                                                                                              |                                                                                                                                  |                                                                                                                                                                                    |  |                                                                                                                      |  |                                                 |  |                                                                 |
|                                                                                                                                  |                                                                                                                                                                                    |                                                                                                                                                                                                                                                                                                                                                                                                                                                                                                                                                                                                                                                                                                                                                                                                                                                              |                                                                                                                                  |                                                                                                                                                                                    |  |                                                                                                                      |  |                                                 |  |                                                                 |

|          | Name all entities with whom you have this relationship or indicate none (add rows as needed)                 | Specifications/Comments (e.g., if payments were made to you or to your institution)                                                                                                               |  |  |  |  |  |  |
|----------|--------------------------------------------------------------------------------------------------------------|---------------------------------------------------------------------------------------------------------------------------------------------------------------------------------------------------|--|--|--|--|--|--|
| <b>3</b> | Royalties or licenses                                                                                        | <input checked="" type="checkbox"/> <b>None</b><br><table border="1" data-bbox="437 385 1538 488"> <tr><td></td><td></td></tr> <tr><td></td><td></td></tr> <tr><td></td><td></td></tr> </table>   |  |  |  |  |  |  |
|          |                                                                                                              |                                                                                                                                                                                                   |  |  |  |  |  |  |
|          |                                                                                                              |                                                                                                                                                                                                   |  |  |  |  |  |  |
|          |                                                                                                              |                                                                                                                                                                                                   |  |  |  |  |  |  |
| <b>4</b> | Consulting fees                                                                                              | <input checked="" type="checkbox"/> <b>None</b><br><table border="1" data-bbox="437 631 1538 734"> <tr><td></td><td></td></tr> <tr><td></td><td></td></tr> <tr><td></td><td></td></tr> </table>   |  |  |  |  |  |  |
|          |                                                                                                              |                                                                                                                                                                                                   |  |  |  |  |  |  |
|          |                                                                                                              |                                                                                                                                                                                                   |  |  |  |  |  |  |
|          |                                                                                                              |                                                                                                                                                                                                   |  |  |  |  |  |  |
| <b>5</b> | Payment or honoraria for lectures, presentations, speakers bureaus, manuscript writing or educational events | <input checked="" type="checkbox"/> <b>None</b><br><table border="1" data-bbox="437 855 1538 958"> <tr><td></td><td></td></tr> <tr><td></td><td></td></tr> <tr><td></td><td></td></tr> </table>   |  |  |  |  |  |  |
|          |                                                                                                              |                                                                                                                                                                                                   |  |  |  |  |  |  |
|          |                                                                                                              |                                                                                                                                                                                                   |  |  |  |  |  |  |
|          |                                                                                                              |                                                                                                                                                                                                   |  |  |  |  |  |  |
| <b>6</b> | Payment for expert testimony                                                                                 | <input checked="" type="checkbox"/> <b>None</b><br><table border="1" data-bbox="437 1200 1538 1303"> <tr><td></td><td></td></tr> <tr><td></td><td></td></tr> <tr><td></td><td></td></tr> </table> |  |  |  |  |  |  |
|          |                                                                                                              |                                                                                                                                                                                                   |  |  |  |  |  |  |
|          |                                                                                                              |                                                                                                                                                                                                   |  |  |  |  |  |  |
|          |                                                                                                              |                                                                                                                                                                                                   |  |  |  |  |  |  |
| <b>7</b> | Support for attending meetings and/or travel                                                                 | <input checked="" type="checkbox"/> <b>None</b><br><table border="1" data-bbox="437 1415 1538 1518"> <tr><td></td><td></td></tr> <tr><td></td><td></td></tr> <tr><td></td><td></td></tr> </table> |  |  |  |  |  |  |
|          |                                                                                                              |                                                                                                                                                                                                   |  |  |  |  |  |  |
|          |                                                                                                              |                                                                                                                                                                                                   |  |  |  |  |  |  |
|          |                                                                                                              |                                                                                                                                                                                                   |  |  |  |  |  |  |
| <b>8</b> | Patents planned, issued or pending                                                                           | <input checked="" type="checkbox"/> <b>None</b><br><table border="1" data-bbox="437 1639 1538 1742"> <tr><td></td><td></td></tr> <tr><td></td><td></td></tr> <tr><td></td><td></td></tr> </table> |  |  |  |  |  |  |
|          |                                                                                                              |                                                                                                                                                                                                   |  |  |  |  |  |  |
|          |                                                                                                              |                                                                                                                                                                                                   |  |  |  |  |  |  |
|          |                                                                                                              |                                                                                                                                                                                                   |  |  |  |  |  |  |
| <b>9</b> | Participation on a Data Safety Monitoring Board or Advisory Board                                            | <input checked="" type="checkbox"/> <b>None</b><br><table border="1" data-bbox="437 1854 1538 1957"> <tr><td></td><td></td></tr> <tr><td></td><td></td></tr> <tr><td></td><td></td></tr> </table> |  |  |  |  |  |  |
|          |                                                                                                              |                                                                                                                                                                                                   |  |  |  |  |  |  |
|          |                                                                                                              |                                                                                                                                                                                                   |  |  |  |  |  |  |
|          |                                                                                                              |                                                                                                                                                                                                   |  |  |  |  |  |  |

|           |                                                                                                   | Name all entities with whom you have this relationship or indicate none (add rows as needed) | Specifications/Comments (e.g., if payments were made to you or to your institution) |
|-----------|---------------------------------------------------------------------------------------------------|----------------------------------------------------------------------------------------------|-------------------------------------------------------------------------------------|
| <b>10</b> | Leadership or fiduciary role in other board, society, committee or advocacy group, paid or unpaid | <input checked="" type="checkbox"/> <b>None</b>                                              |                                                                                     |
|           |                                                                                                   |                                                                                              |                                                                                     |
|           |                                                                                                   |                                                                                              |                                                                                     |
| <b>11</b> | Stock or stock options                                                                            | <input checked="" type="checkbox"/> <b>None</b>                                              |                                                                                     |
|           |                                                                                                   |                                                                                              |                                                                                     |
|           |                                                                                                   |                                                                                              |                                                                                     |
| <b>12</b> | Receipt of equipment, materials, drugs, medical writing, gifts or other services                  | <input checked="" type="checkbox"/> <b>None</b>                                              |                                                                                     |
|           |                                                                                                   |                                                                                              |                                                                                     |
|           |                                                                                                   |                                                                                              |                                                                                     |
| <b>13</b> | Other financial or non-financial interests                                                        | <input checked="" type="checkbox"/> <b>None</b>                                              |                                                                                     |
|           |                                                                                                   |                                                                                              |                                                                                     |
|           |                                                                                                   |                                                                                              |                                                                                     |

Please place an "X" next to the following statement to indicate your agreement:

I certify that I have answered every question and have not altered the wording of any of the questions on this form.



## ICMJE DISCLOSURE FORM

**Date:** 9/15/2022

**Your Name:** Dr. Jan Kruse

**Manuscript Title:** One-year follow-up of the CAPSID randomized trial for high-dose convalescent plasma in severe COVID-19 patients

**Manuscript Number (if known):** 163657-JCI-CMED-RV-2

In the interest of transparency, we ask you to disclose all relationships/activities/interests listed below that are related to the content of your manuscript. "Related" means any relation with for-profit or not-for-profit third parties whose interests may be affected by the content of the manuscript. Disclosure represents a commitment to transparency and does not necessarily indicate a bias. If you are in doubt about whether to list a relationship/activity/interest, it is preferable that you do so.

The author's relationships/activities/interests should be defined broadly. For example, if your manuscript pertains to the epidemiology of hypertension, you should declare all relationships with manufacturers of antihypertensive medication, even if that medication is not mentioned in the manuscript.

In item #1 below, report all support for the work reported in this manuscript without time limit. For all other items, the time frame for disclosure is the past 36 months.

|                                                                                                                                  | Name all entities with whom you have this relationship or indicate none (add rows as needed)                                                                                       | Specifications/Comments (e.g., if payments were made to you or to your institution)                                                                                                                                                                                                                                                                                                                                                                                                                                                                                                                                                                                                                                                                                                                                                               |                                                                                                                                  |                                                                                                                                                                                    |  |                                                                                                                      |  |                                                 |  |                                                                 |
|----------------------------------------------------------------------------------------------------------------------------------|------------------------------------------------------------------------------------------------------------------------------------------------------------------------------------|---------------------------------------------------------------------------------------------------------------------------------------------------------------------------------------------------------------------------------------------------------------------------------------------------------------------------------------------------------------------------------------------------------------------------------------------------------------------------------------------------------------------------------------------------------------------------------------------------------------------------------------------------------------------------------------------------------------------------------------------------------------------------------------------------------------------------------------------------|----------------------------------------------------------------------------------------------------------------------------------|------------------------------------------------------------------------------------------------------------------------------------------------------------------------------------|--|----------------------------------------------------------------------------------------------------------------------|--|-------------------------------------------------|--|-----------------------------------------------------------------|
| Time frame: Since the initial planning of the work                                                                               |                                                                                                                                                                                    |                                                                                                                                                                                                                                                                                                                                                                                                                                                                                                                                                                                                                                                                                                                                                                                                                                                   |                                                                                                                                  |                                                                                                                                                                                    |  |                                                                                                                      |  |                                                 |  |                                                                 |
| <b>1</b>                                                                                                                         | All support for the present manuscript (e.g., funding, provision of study materials, medical writing, article processing charges, etc.)<br><b>No time limit for this item.</b>     | <input type="checkbox"/> <b>None</b><br><br><table border="1" style="width: 100%; border-collapse: collapse;"> <tr> <td style="width: 60%;">General funding started in 01.04.2020 and ended 31.05.2022<br/><b>German Federal Ministry of Health funded the clinical trial</b></td> <td style="width: 40%;"><b>German Federal Ministry of Health funded the clinical trial. Expense reimbursement for patient treatment paid by the sponsor DRK Blutspendedienst Baden-Württemberg Hessen.</b></td> </tr> <tr> <td></td> <td>up to 4400 € per patient treated within the first part of the trial<br/>2000 € set up fee for initiation of the trial</td> </tr> <tr> <td></td> <td>up to 885 € per patient in the follow up period</td> </tr> <tr> <td></td> <td>All paid to participating institution [not to the investigator]</td> </tr> </table> | General funding started in 01.04.2020 and ended 31.05.2022<br><b>German Federal Ministry of Health funded the clinical trial</b> | <b>German Federal Ministry of Health funded the clinical trial. Expense reimbursement for patient treatment paid by the sponsor DRK Blutspendedienst Baden-Württemberg Hessen.</b> |  | up to 4400 € per patient treated within the first part of the trial<br>2000 € set up fee for initiation of the trial |  | up to 885 € per patient in the follow up period |  | All paid to participating institution [not to the investigator] |
| General funding started in 01.04.2020 and ended 31.05.2022<br><b>German Federal Ministry of Health funded the clinical trial</b> | <b>German Federal Ministry of Health funded the clinical trial. Expense reimbursement for patient treatment paid by the sponsor DRK Blutspendedienst Baden-Württemberg Hessen.</b> |                                                                                                                                                                                                                                                                                                                                                                                                                                                                                                                                                                                                                                                                                                                                                                                                                                                   |                                                                                                                                  |                                                                                                                                                                                    |  |                                                                                                                      |  |                                                 |  |                                                                 |
|                                                                                                                                  | up to 4400 € per patient treated within the first part of the trial<br>2000 € set up fee for initiation of the trial                                                               |                                                                                                                                                                                                                                                                                                                                                                                                                                                                                                                                                                                                                                                                                                                                                                                                                                                   |                                                                                                                                  |                                                                                                                                                                                    |  |                                                                                                                      |  |                                                 |  |                                                                 |
|                                                                                                                                  | up to 885 € per patient in the follow up period                                                                                                                                    |                                                                                                                                                                                                                                                                                                                                                                                                                                                                                                                                                                                                                                                                                                                                                                                                                                                   |                                                                                                                                  |                                                                                                                                                                                    |  |                                                                                                                      |  |                                                 |  |                                                                 |
|                                                                                                                                  | All paid to participating institution [not to the investigator]                                                                                                                    |                                                                                                                                                                                                                                                                                                                                                                                                                                                                                                                                                                                                                                                                                                                                                                                                                                                   |                                                                                                                                  |                                                                                                                                                                                    |  |                                                                                                                      |  |                                                 |  |                                                                 |
| Time frame: past 36 months                                                                                                       |                                                                                                                                                                                    |                                                                                                                                                                                                                                                                                                                                                                                                                                                                                                                                                                                                                                                                                                                                                                                                                                                   |                                                                                                                                  |                                                                                                                                                                                    |  |                                                                                                                      |  |                                                 |  |                                                                 |
| <b>2</b>                                                                                                                         | Grants or contracts from any entity (if not indicated in item #1 above).                                                                                                           | <input checked="" type="checkbox"/> <b>None</b><br><br><table border="1" style="width: 100%; border-collapse: collapse;"> <tr><td style="width: 60%; height: 20px;"></td><td style="width: 40%;"></td></tr> <tr><td style="height: 20px;"></td><td></td></tr> <tr><td style="height: 20px;"></td><td></td></tr> </table>                                                                                                                                                                                                                                                                                                                                                                                                                                                                                                                          |                                                                                                                                  |                                                                                                                                                                                    |  |                                                                                                                      |  |                                                 |  |                                                                 |
|                                                                                                                                  |                                                                                                                                                                                    |                                                                                                                                                                                                                                                                                                                                                                                                                                                                                                                                                                                                                                                                                                                                                                                                                                                   |                                                                                                                                  |                                                                                                                                                                                    |  |                                                                                                                      |  |                                                 |  |                                                                 |
|                                                                                                                                  |                                                                                                                                                                                    |                                                                                                                                                                                                                                                                                                                                                                                                                                                                                                                                                                                                                                                                                                                                                                                                                                                   |                                                                                                                                  |                                                                                                                                                                                    |  |                                                                                                                      |  |                                                 |  |                                                                 |
|                                                                                                                                  |                                                                                                                                                                                    |                                                                                                                                                                                                                                                                                                                                                                                                                                                                                                                                                                                                                                                                                                                                                                                                                                                   |                                                                                                                                  |                                                                                                                                                                                    |  |                                                                                                                      |  |                                                 |  |                                                                 |

|          | Name all entities with whom you have this relationship or indicate none (add rows as needed)                 | Specifications/Comments (e.g., if payments were made to you or to your institution)                                                                                                               |  |  |  |  |  |  |
|----------|--------------------------------------------------------------------------------------------------------------|---------------------------------------------------------------------------------------------------------------------------------------------------------------------------------------------------|--|--|--|--|--|--|
| <b>3</b> | Royalties or licenses                                                                                        | <input checked="" type="checkbox"/> <b>None</b><br><table border="1" data-bbox="437 383 1538 488"> <tr><td></td><td></td></tr> <tr><td></td><td></td></tr> <tr><td></td><td></td></tr> </table>   |  |  |  |  |  |  |
|          |                                                                                                              |                                                                                                                                                                                                   |  |  |  |  |  |  |
|          |                                                                                                              |                                                                                                                                                                                                   |  |  |  |  |  |  |
|          |                                                                                                              |                                                                                                                                                                                                   |  |  |  |  |  |  |
| <b>4</b> | Consulting fees                                                                                              | <input checked="" type="checkbox"/> <b>None</b><br><table border="1" data-bbox="437 629 1538 734"> <tr><td></td><td></td></tr> <tr><td></td><td></td></tr> <tr><td></td><td></td></tr> </table>   |  |  |  |  |  |  |
|          |                                                                                                              |                                                                                                                                                                                                   |  |  |  |  |  |  |
|          |                                                                                                              |                                                                                                                                                                                                   |  |  |  |  |  |  |
|          |                                                                                                              |                                                                                                                                                                                                   |  |  |  |  |  |  |
| <b>5</b> | Payment or honoraria for lectures, presentations, speakers bureaus, manuscript writing or educational events | <input checked="" type="checkbox"/> <b>None</b><br><table border="1" data-bbox="437 853 1538 958"> <tr><td></td><td></td></tr> <tr><td></td><td></td></tr> <tr><td></td><td></td></tr> </table>   |  |  |  |  |  |  |
|          |                                                                                                              |                                                                                                                                                                                                   |  |  |  |  |  |  |
|          |                                                                                                              |                                                                                                                                                                                                   |  |  |  |  |  |  |
|          |                                                                                                              |                                                                                                                                                                                                   |  |  |  |  |  |  |
| <b>6</b> | Payment for expert testimony                                                                                 | <input checked="" type="checkbox"/> <b>None</b><br><table border="1" data-bbox="437 1200 1538 1305"> <tr><td></td><td></td></tr> <tr><td></td><td></td></tr> <tr><td></td><td></td></tr> </table> |  |  |  |  |  |  |
|          |                                                                                                              |                                                                                                                                                                                                   |  |  |  |  |  |  |
|          |                                                                                                              |                                                                                                                                                                                                   |  |  |  |  |  |  |
|          |                                                                                                              |                                                                                                                                                                                                   |  |  |  |  |  |  |
| <b>7</b> | Support for attending meetings and/or travel                                                                 | <input checked="" type="checkbox"/> <b>None</b><br><table border="1" data-bbox="437 1424 1538 1529"> <tr><td></td><td></td></tr> <tr><td></td><td></td></tr> <tr><td></td><td></td></tr> </table> |  |  |  |  |  |  |
|          |                                                                                                              |                                                                                                                                                                                                   |  |  |  |  |  |  |
|          |                                                                                                              |                                                                                                                                                                                                   |  |  |  |  |  |  |
|          |                                                                                                              |                                                                                                                                                                                                   |  |  |  |  |  |  |
| <b>8</b> | Patents planned, issued or pending                                                                           | <input checked="" type="checkbox"/> <b>None</b><br><table border="1" data-bbox="437 1648 1538 1753"> <tr><td></td><td></td></tr> <tr><td></td><td></td></tr> <tr><td></td><td></td></tr> </table> |  |  |  |  |  |  |
|          |                                                                                                              |                                                                                                                                                                                                   |  |  |  |  |  |  |
|          |                                                                                                              |                                                                                                                                                                                                   |  |  |  |  |  |  |
|          |                                                                                                              |                                                                                                                                                                                                   |  |  |  |  |  |  |
| <b>9</b> | Participation on a Data Safety Monitoring Board or Advisory Board                                            | <input checked="" type="checkbox"/> <b>None</b><br><table border="1" data-bbox="437 1872 1538 1977"> <tr><td></td><td></td></tr> <tr><td></td><td></td></tr> <tr><td></td><td></td></tr> </table> |  |  |  |  |  |  |
|          |                                                                                                              |                                                                                                                                                                                                   |  |  |  |  |  |  |
|          |                                                                                                              |                                                                                                                                                                                                   |  |  |  |  |  |  |
|          |                                                                                                              |                                                                                                                                                                                                   |  |  |  |  |  |  |

|        | Name all entities with whom you have this relationship or indicate none (add rows as needed)      | Specifications/Comments (e.g., if payments were made to you or to your institution)                                                                                                               |  |  |  |  |  |  |
|--------|---------------------------------------------------------------------------------------------------|---------------------------------------------------------------------------------------------------------------------------------------------------------------------------------------------------|--|--|--|--|--|--|
| 1<br>0 | Leadership or fiduciary role in other board, society, committee or advocacy group, paid or unpaid | <input checked="" type="checkbox"/> <b>None</b><br><table border="1" data-bbox="435 387 1541 488"> <tr><td></td><td></td></tr> <tr><td></td><td></td></tr> <tr><td></td><td></td></tr> </table>   |  |  |  |  |  |  |
|        |                                                                                                   |                                                                                                                                                                                                   |  |  |  |  |  |  |
|        |                                                                                                   |                                                                                                                                                                                                   |  |  |  |  |  |  |
|        |                                                                                                   |                                                                                                                                                                                                   |  |  |  |  |  |  |
| 1<br>1 | Stock or stock options                                                                            | <input checked="" type="checkbox"/> <b>None</b><br><table border="1" data-bbox="435 701 1541 801"> <tr><td></td><td></td></tr> <tr><td></td><td></td></tr> <tr><td></td><td></td></tr> </table>   |  |  |  |  |  |  |
|        |                                                                                                   |                                                                                                                                                                                                   |  |  |  |  |  |  |
|        |                                                                                                   |                                                                                                                                                                                                   |  |  |  |  |  |  |
|        |                                                                                                   |                                                                                                                                                                                                   |  |  |  |  |  |  |
| 1<br>2 | Receipt of equipment, materials, drugs, medical writing, gifts or other services                  | <input checked="" type="checkbox"/> <b>None</b><br><table border="1" data-bbox="435 918 1541 1019"> <tr><td></td><td></td></tr> <tr><td></td><td></td></tr> <tr><td></td><td></td></tr> </table>  |  |  |  |  |  |  |
|        |                                                                                                   |                                                                                                                                                                                                   |  |  |  |  |  |  |
|        |                                                                                                   |                                                                                                                                                                                                   |  |  |  |  |  |  |
|        |                                                                                                   |                                                                                                                                                                                                   |  |  |  |  |  |  |
| 1<br>3 | Other financial or non-financial interests                                                        | <input checked="" type="checkbox"/> <b>None</b><br><table border="1" data-bbox="435 1198 1541 1299"> <tr><td></td><td></td></tr> <tr><td></td><td></td></tr> <tr><td></td><td></td></tr> </table> |  |  |  |  |  |  |
|        |                                                                                                   |                                                                                                                                                                                                   |  |  |  |  |  |  |
|        |                                                                                                   |                                                                                                                                                                                                   |  |  |  |  |  |  |
|        |                                                                                                   |                                                                                                                                                                                                   |  |  |  |  |  |  |

Please place an "X" next to the following statement to indicate your agreement:

I certify that I have answered every question and have not altered the wording of any of the questions on this form.

## ICMJE DISCLOSURE FORM

**Date:** 9/15/2022

**Your Name:** PD Dr. Jörg Krebs

**Manuscript Title:** One-year follow-up of the CAPSID randomized trial for high-dose convalescent plasma in severe COVID-19 patients

**Manuscript Number (if known):** 163657-JCI-CMED-RV-2

In the interest of transparency, we ask you to disclose all relationships/activities/interests listed below that are related to the content of your manuscript. "Related" means any relation with for-profit or not-for-profit third parties whose interests may be affected by the content of the manuscript. Disclosure represents a commitment to transparency and does not necessarily indicate a bias. If you are in doubt about whether to list a relationship/activity/interest, it is preferable that you do so.

The author's relationships/activities/interests should be defined broadly. For example, if your manuscript pertains to the epidemiology of hypertension, you should declare all relationships with manufacturers of antihypertensive medication, even if that medication is not mentioned in the manuscript.

In item #1 below, report all support for the work reported in this manuscript without time limit. For all other items, the time frame for disclosure is the past 36 months.

|                                                                                                                                  | Name all entities with whom you have this relationship or indicate none (add rows as needed)                                                                                       | Specifications/Comments (e.g., if payments were made to you or to your institution)                                                                                                                                                                                                                                                                                                                                                                                                                                                                                                                                                                                                                                                                                                                                                               |                                                                                                                                  |                                                                                                                                                                                    |  |                                                                                                                      |  |                                                 |  |                                                                 |
|----------------------------------------------------------------------------------------------------------------------------------|------------------------------------------------------------------------------------------------------------------------------------------------------------------------------------|---------------------------------------------------------------------------------------------------------------------------------------------------------------------------------------------------------------------------------------------------------------------------------------------------------------------------------------------------------------------------------------------------------------------------------------------------------------------------------------------------------------------------------------------------------------------------------------------------------------------------------------------------------------------------------------------------------------------------------------------------------------------------------------------------------------------------------------------------|----------------------------------------------------------------------------------------------------------------------------------|------------------------------------------------------------------------------------------------------------------------------------------------------------------------------------|--|----------------------------------------------------------------------------------------------------------------------|--|-------------------------------------------------|--|-----------------------------------------------------------------|
| Time frame: Since the initial planning of the work                                                                               |                                                                                                                                                                                    |                                                                                                                                                                                                                                                                                                                                                                                                                                                                                                                                                                                                                                                                                                                                                                                                                                                   |                                                                                                                                  |                                                                                                                                                                                    |  |                                                                                                                      |  |                                                 |  |                                                                 |
| <b>1</b>                                                                                                                         | All support for the present manuscript (e.g., funding, provision of study materials, medical writing, article processing charges, etc.)<br><b>No time limit for this item.</b>     | <input type="checkbox"/> <b>None</b><br><br><table border="1" style="width: 100%; border-collapse: collapse;"> <tr> <td style="width: 60%;">General funding started in 01.04.2020 and ended 31.05.2022<br/><b>German Federal Ministry of Health funded the clinical trial</b></td> <td style="width: 40%;"><b>German Federal Ministry of Health funded the clinical trial. Expense reimbursement for patient treatment paid by the sponsor DRK Blutspendedienst Baden-Württemberg Hessen.</b></td> </tr> <tr> <td></td> <td>up to 4400 € per patient treated within the first part of the trial<br/>2000 € set up fee for initiation of the trial</td> </tr> <tr> <td></td> <td>up to 885 € per patient in the follow up period</td> </tr> <tr> <td></td> <td>All paid to participating institution [not to the investigator]</td> </tr> </table> | General funding started in 01.04.2020 and ended 31.05.2022<br><b>German Federal Ministry of Health funded the clinical trial</b> | <b>German Federal Ministry of Health funded the clinical trial. Expense reimbursement for patient treatment paid by the sponsor DRK Blutspendedienst Baden-Württemberg Hessen.</b> |  | up to 4400 € per patient treated within the first part of the trial<br>2000 € set up fee for initiation of the trial |  | up to 885 € per patient in the follow up period |  | All paid to participating institution [not to the investigator] |
| General funding started in 01.04.2020 and ended 31.05.2022<br><b>German Federal Ministry of Health funded the clinical trial</b> | <b>German Federal Ministry of Health funded the clinical trial. Expense reimbursement for patient treatment paid by the sponsor DRK Blutspendedienst Baden-Württemberg Hessen.</b> |                                                                                                                                                                                                                                                                                                                                                                                                                                                                                                                                                                                                                                                                                                                                                                                                                                                   |                                                                                                                                  |                                                                                                                                                                                    |  |                                                                                                                      |  |                                                 |  |                                                                 |
|                                                                                                                                  | up to 4400 € per patient treated within the first part of the trial<br>2000 € set up fee for initiation of the trial                                                               |                                                                                                                                                                                                                                                                                                                                                                                                                                                                                                                                                                                                                                                                                                                                                                                                                                                   |                                                                                                                                  |                                                                                                                                                                                    |  |                                                                                                                      |  |                                                 |  |                                                                 |
|                                                                                                                                  | up to 885 € per patient in the follow up period                                                                                                                                    |                                                                                                                                                                                                                                                                                                                                                                                                                                                                                                                                                                                                                                                                                                                                                                                                                                                   |                                                                                                                                  |                                                                                                                                                                                    |  |                                                                                                                      |  |                                                 |  |                                                                 |
|                                                                                                                                  | All paid to participating institution [not to the investigator]                                                                                                                    |                                                                                                                                                                                                                                                                                                                                                                                                                                                                                                                                                                                                                                                                                                                                                                                                                                                   |                                                                                                                                  |                                                                                                                                                                                    |  |                                                                                                                      |  |                                                 |  |                                                                 |
| Time frame: past 36 months                                                                                                       |                                                                                                                                                                                    |                                                                                                                                                                                                                                                                                                                                                                                                                                                                                                                                                                                                                                                                                                                                                                                                                                                   |                                                                                                                                  |                                                                                                                                                                                    |  |                                                                                                                      |  |                                                 |  |                                                                 |
| <b>2</b>                                                                                                                         | Grants or contracts from any entity (if not indicated in item #1 above).                                                                                                           | <input checked="" type="checkbox"/> <b>None</b><br><br><table border="1" style="width: 100%; border-collapse: collapse;"> <tr><td style="width: 60%; height: 20px;"></td><td style="width: 40%;"></td></tr> <tr><td style="height: 20px;"></td><td></td></tr> <tr><td style="height: 20px;"></td><td></td></tr> </table>                                                                                                                                                                                                                                                                                                                                                                                                                                                                                                                          |                                                                                                                                  |                                                                                                                                                                                    |  |                                                                                                                      |  |                                                 |  |                                                                 |
|                                                                                                                                  |                                                                                                                                                                                    |                                                                                                                                                                                                                                                                                                                                                                                                                                                                                                                                                                                                                                                                                                                                                                                                                                                   |                                                                                                                                  |                                                                                                                                                                                    |  |                                                                                                                      |  |                                                 |  |                                                                 |
|                                                                                                                                  |                                                                                                                                                                                    |                                                                                                                                                                                                                                                                                                                                                                                                                                                                                                                                                                                                                                                                                                                                                                                                                                                   |                                                                                                                                  |                                                                                                                                                                                    |  |                                                                                                                      |  |                                                 |  |                                                                 |
|                                                                                                                                  |                                                                                                                                                                                    |                                                                                                                                                                                                                                                                                                                                                                                                                                                                                                                                                                                                                                                                                                                                                                                                                                                   |                                                                                                                                  |                                                                                                                                                                                    |  |                                                                                                                      |  |                                                 |  |                                                                 |

|   | Name all entities with whom you have this relationship or indicate none (add rows as needed)                 | Specifications/Comments (e.g., if payments were made to you or to your institution)                                                                                                               |  |  |  |  |  |  |
|---|--------------------------------------------------------------------------------------------------------------|---------------------------------------------------------------------------------------------------------------------------------------------------------------------------------------------------|--|--|--|--|--|--|
| 3 | Royalties or licenses                                                                                        | <input checked="" type="checkbox"/> <b>None</b><br><table border="1" data-bbox="437 383 1538 488"> <tr><td></td><td></td></tr> <tr><td></td><td></td></tr> <tr><td></td><td></td></tr> </table>   |  |  |  |  |  |  |
|   |                                                                                                              |                                                                                                                                                                                                   |  |  |  |  |  |  |
|   |                                                                                                              |                                                                                                                                                                                                   |  |  |  |  |  |  |
|   |                                                                                                              |                                                                                                                                                                                                   |  |  |  |  |  |  |
| 4 | Consulting fees                                                                                              | <input checked="" type="checkbox"/> <b>None</b><br><table border="1" data-bbox="437 629 1538 734"> <tr><td></td><td></td></tr> <tr><td></td><td></td></tr> <tr><td></td><td></td></tr> </table>   |  |  |  |  |  |  |
|   |                                                                                                              |                                                                                                                                                                                                   |  |  |  |  |  |  |
|   |                                                                                                              |                                                                                                                                                                                                   |  |  |  |  |  |  |
|   |                                                                                                              |                                                                                                                                                                                                   |  |  |  |  |  |  |
| 5 | Payment or honoraria for lectures, presentations, speakers bureaus, manuscript writing or educational events | <input checked="" type="checkbox"/> <b>None</b><br><table border="1" data-bbox="437 853 1538 958"> <tr><td></td><td></td></tr> <tr><td></td><td></td></tr> <tr><td></td><td></td></tr> </table>   |  |  |  |  |  |  |
|   |                                                                                                              |                                                                                                                                                                                                   |  |  |  |  |  |  |
|   |                                                                                                              |                                                                                                                                                                                                   |  |  |  |  |  |  |
|   |                                                                                                              |                                                                                                                                                                                                   |  |  |  |  |  |  |
| 6 | Payment for expert testimony                                                                                 | <input checked="" type="checkbox"/> <b>None</b><br><table border="1" data-bbox="437 1200 1538 1305"> <tr><td></td><td></td></tr> <tr><td></td><td></td></tr> <tr><td></td><td></td></tr> </table> |  |  |  |  |  |  |
|   |                                                                                                              |                                                                                                                                                                                                   |  |  |  |  |  |  |
|   |                                                                                                              |                                                                                                                                                                                                   |  |  |  |  |  |  |
|   |                                                                                                              |                                                                                                                                                                                                   |  |  |  |  |  |  |
| 7 | Support for attending meetings and/or travel                                                                 | <input checked="" type="checkbox"/> <b>None</b><br><table border="1" data-bbox="437 1413 1538 1518"> <tr><td></td><td></td></tr> <tr><td></td><td></td></tr> <tr><td></td><td></td></tr> </table> |  |  |  |  |  |  |
|   |                                                                                                              |                                                                                                                                                                                                   |  |  |  |  |  |  |
|   |                                                                                                              |                                                                                                                                                                                                   |  |  |  |  |  |  |
|   |                                                                                                              |                                                                                                                                                                                                   |  |  |  |  |  |  |
| 8 | Patents planned, issued or pending                                                                           | <input checked="" type="checkbox"/> <b>None</b><br><table border="1" data-bbox="437 1637 1538 1742"> <tr><td></td><td></td></tr> <tr><td></td><td></td></tr> <tr><td></td><td></td></tr> </table> |  |  |  |  |  |  |
|   |                                                                                                              |                                                                                                                                                                                                   |  |  |  |  |  |  |
|   |                                                                                                              |                                                                                                                                                                                                   |  |  |  |  |  |  |
|   |                                                                                                              |                                                                                                                                                                                                   |  |  |  |  |  |  |
| 9 | Participation on a Data Safety Monitoring Board or Advisory Board                                            | <input checked="" type="checkbox"/> <b>None</b><br><table border="1" data-bbox="437 1861 1538 1966"> <tr><td></td><td></td></tr> <tr><td></td><td></td></tr> <tr><td></td><td></td></tr> </table> |  |  |  |  |  |  |
|   |                                                                                                              |                                                                                                                                                                                                   |  |  |  |  |  |  |
|   |                                                                                                              |                                                                                                                                                                                                   |  |  |  |  |  |  |
|   |                                                                                                              |                                                                                                                                                                                                   |  |  |  |  |  |  |

|           |                                                                                                   | Name all entities with whom you have this relationship or indicate none (add rows as needed) | Specifications/Comments (e.g., if payments were made to you or to your institution) |
|-----------|---------------------------------------------------------------------------------------------------|----------------------------------------------------------------------------------------------|-------------------------------------------------------------------------------------|
| <b>10</b> | Leadership or fiduciary role in other board, society, committee or advocacy group, paid or unpaid | <input checked="" type="checkbox"/> <b>None</b>                                              |                                                                                     |
|           |                                                                                                   |                                                                                              |                                                                                     |
|           |                                                                                                   |                                                                                              |                                                                                     |
| <b>11</b> | Stock or stock options                                                                            | <input checked="" type="checkbox"/> <b>None</b>                                              |                                                                                     |
|           |                                                                                                   |                                                                                              |                                                                                     |
|           |                                                                                                   |                                                                                              |                                                                                     |
| <b>12</b> | Receipt of equipment, materials, drugs, medical writing, gifts or other services                  | <input checked="" type="checkbox"/> <b>None</b>                                              |                                                                                     |
|           |                                                                                                   |                                                                                              |                                                                                     |
|           |                                                                                                   |                                                                                              |                                                                                     |
| <b>13</b> | Other financial or non-financial interests                                                        | <input checked="" type="checkbox"/> <b>None</b>                                              |                                                                                     |
|           |                                                                                                   |                                                                                              |                                                                                     |
|           |                                                                                                   |                                                                                              |                                                                                     |

Please place an "X" next to the following statement to indicate your agreement:

I certify that I have answered every question and have not altered the wording of any of the questions on this form.

## ICMJE DISCLOSURE FORM

**Date:** 9/15/2022

**Your Name:** Dr. Julian Knörlein

**Manuscript Title:** One-year follow-up of the CAPSID randomized trial for high-dose convalescent plasma in severe COVID-19 patients

**Manuscript Number (if known):** 163657-JCI-CMED-RV-2

In the interest of transparency, we ask you to disclose all relationships/activities/interests listed below that are related to the content of your manuscript. "Related" means any relation with for-profit or not-for-profit third parties whose interests may be affected by the content of the manuscript. Disclosure represents a commitment to transparency and does not necessarily indicate a bias. If you are in doubt about whether to list a relationship/activity/interest, it is preferable that you do so.

The author's relationships/activities/interests should be defined broadly. For example, if your manuscript pertains to the epidemiology of hypertension, you should declare all relationships with manufacturers of antihypertensive medication, even if that medication is not mentioned in the manuscript.

In item #1 below, report all support for the work reported in this manuscript without time limit. For all other items, the time frame for disclosure is the past 36 months.

|                                                                                                                                  | Name all entities with whom you have this relationship or indicate none (add rows as needed)                                                                                     | Specifications/Comments (e.g., if payments were made to you or to your institution)                                                                                                                                                                                                                                                                                                                                                                                                                                                                                                                                                                                                                                                                                                                                                |                                                                                                                                  |                                                                                                                                                                                  |  |                                                                                                                |  |                                                 |  |                                                                 |
|----------------------------------------------------------------------------------------------------------------------------------|----------------------------------------------------------------------------------------------------------------------------------------------------------------------------------|------------------------------------------------------------------------------------------------------------------------------------------------------------------------------------------------------------------------------------------------------------------------------------------------------------------------------------------------------------------------------------------------------------------------------------------------------------------------------------------------------------------------------------------------------------------------------------------------------------------------------------------------------------------------------------------------------------------------------------------------------------------------------------------------------------------------------------|----------------------------------------------------------------------------------------------------------------------------------|----------------------------------------------------------------------------------------------------------------------------------------------------------------------------------|--|----------------------------------------------------------------------------------------------------------------|--|-------------------------------------------------|--|-----------------------------------------------------------------|
| Time frame: Since the initial planning of the work                                                                               |                                                                                                                                                                                  |                                                                                                                                                                                                                                                                                                                                                                                                                                                                                                                                                                                                                                                                                                                                                                                                                                    |                                                                                                                                  |                                                                                                                                                                                  |  |                                                                                                                |  |                                                 |  |                                                                 |
| <b>1</b>                                                                                                                         | All support for the present manuscript (e.g., funding, provision of study materials, medical writing, article processing charges, etc.)<br><b>No time limit for this item.</b>   | <input type="checkbox"/> None<br><br><table border="1" style="width: 100%; border-collapse: collapse;"> <tr> <td style="width: 60%;">General funding started in 01.04.2020 and ended 31.05.2022<br/><b>German Federal Ministry of Health funded the clinical trial</b></td> <td style="width: 40%;"><b>German Federal Ministry of Health funded the clinical trial. Expense reimbursement for patient treatment paid by the sponsor DRK Blutspendedienst Baden-Württemberg Hesse</b></td> </tr> <tr> <td></td> <td>up to 4400 € per patient treated within the part of the trial<br/>2000 € set up fee for initiation of the trial</td> </tr> <tr> <td></td> <td>up to 885 € per patient in the follow up period</td> </tr> <tr> <td></td> <td>All paid to participating institution [not to the investigator]</td> </tr> </table> | General funding started in 01.04.2020 and ended 31.05.2022<br><b>German Federal Ministry of Health funded the clinical trial</b> | <b>German Federal Ministry of Health funded the clinical trial. Expense reimbursement for patient treatment paid by the sponsor DRK Blutspendedienst Baden-Württemberg Hesse</b> |  | up to 4400 € per patient treated within the part of the trial<br>2000 € set up fee for initiation of the trial |  | up to 885 € per patient in the follow up period |  | All paid to participating institution [not to the investigator] |
| General funding started in 01.04.2020 and ended 31.05.2022<br><b>German Federal Ministry of Health funded the clinical trial</b> | <b>German Federal Ministry of Health funded the clinical trial. Expense reimbursement for patient treatment paid by the sponsor DRK Blutspendedienst Baden-Württemberg Hesse</b> |                                                                                                                                                                                                                                                                                                                                                                                                                                                                                                                                                                                                                                                                                                                                                                                                                                    |                                                                                                                                  |                                                                                                                                                                                  |  |                                                                                                                |  |                                                 |  |                                                                 |
|                                                                                                                                  | up to 4400 € per patient treated within the part of the trial<br>2000 € set up fee for initiation of the trial                                                                   |                                                                                                                                                                                                                                                                                                                                                                                                                                                                                                                                                                                                                                                                                                                                                                                                                                    |                                                                                                                                  |                                                                                                                                                                                  |  |                                                                                                                |  |                                                 |  |                                                                 |
|                                                                                                                                  | up to 885 € per patient in the follow up period                                                                                                                                  |                                                                                                                                                                                                                                                                                                                                                                                                                                                                                                                                                                                                                                                                                                                                                                                                                                    |                                                                                                                                  |                                                                                                                                                                                  |  |                                                                                                                |  |                                                 |  |                                                                 |
|                                                                                                                                  | All paid to participating institution [not to the investigator]                                                                                                                  |                                                                                                                                                                                                                                                                                                                                                                                                                                                                                                                                                                                                                                                                                                                                                                                                                                    |                                                                                                                                  |                                                                                                                                                                                  |  |                                                                                                                |  |                                                 |  |                                                                 |
| Time frame: past 36 months                                                                                                       |                                                                                                                                                                                  |                                                                                                                                                                                                                                                                                                                                                                                                                                                                                                                                                                                                                                                                                                                                                                                                                                    |                                                                                                                                  |                                                                                                                                                                                  |  |                                                                                                                |  |                                                 |  |                                                                 |
| <b>2</b>                                                                                                                         | Grants or contracts from any entity (if not indicated in item #1 above).                                                                                                         | <input checked="" type="checkbox"/> None<br><br><table border="1" style="width: 100%; border-collapse: collapse;"> <tr><td style="height: 20px;"> </td><td> </td></tr> <tr><td style="height: 20px;"> </td><td> </td></tr> <tr><td style="height: 20px;"> </td><td> </td></tr> </table>                                                                                                                                                                                                                                                                                                                                                                                                                                                                                                                                            |                                                                                                                                  |                                                                                                                                                                                  |  |                                                                                                                |  |                                                 |  |                                                                 |
|                                                                                                                                  |                                                                                                                                                                                  |                                                                                                                                                                                                                                                                                                                                                                                                                                                                                                                                                                                                                                                                                                                                                                                                                                    |                                                                                                                                  |                                                                                                                                                                                  |  |                                                                                                                |  |                                                 |  |                                                                 |
|                                                                                                                                  |                                                                                                                                                                                  |                                                                                                                                                                                                                                                                                                                                                                                                                                                                                                                                                                                                                                                                                                                                                                                                                                    |                                                                                                                                  |                                                                                                                                                                                  |  |                                                                                                                |  |                                                 |  |                                                                 |
|                                                                                                                                  |                                                                                                                                                                                  |                                                                                                                                                                                                                                                                                                                                                                                                                                                                                                                                                                                                                                                                                                                                                                                                                                    |                                                                                                                                  |                                                                                                                                                                                  |  |                                                                                                                |  |                                                 |  |                                                                 |

|          | Name all entities with whom you have this relationship or indicate none (add rows as needed)                 | Specifications/Comments (e.g., if payments were made to you or to your institution)                                                                                                                     |  |  |  |  |  |  |
|----------|--------------------------------------------------------------------------------------------------------------|---------------------------------------------------------------------------------------------------------------------------------------------------------------------------------------------------------|--|--|--|--|--|--|
| <b>3</b> | Royalties or licenses                                                                                        | <input checked="" type="checkbox"/> <b>None</b><br><table border="1" data-bbox="437 383 1011 488"> <tr><td> </td><td> </td></tr> <tr><td> </td><td> </td></tr> <tr><td> </td><td> </td></tr> </table>   |  |  |  |  |  |  |
|          |                                                                                                              |                                                                                                                                                                                                         |  |  |  |  |  |  |
|          |                                                                                                              |                                                                                                                                                                                                         |  |  |  |  |  |  |
|          |                                                                                                              |                                                                                                                                                                                                         |  |  |  |  |  |  |
| <b>4</b> | Consulting fees                                                                                              | <input checked="" type="checkbox"/> <b>None</b><br><table border="1" data-bbox="437 629 1011 734"> <tr><td> </td><td> </td></tr> <tr><td> </td><td> </td></tr> <tr><td> </td><td> </td></tr> </table>   |  |  |  |  |  |  |
|          |                                                                                                              |                                                                                                                                                                                                         |  |  |  |  |  |  |
|          |                                                                                                              |                                                                                                                                                                                                         |  |  |  |  |  |  |
|          |                                                                                                              |                                                                                                                                                                                                         |  |  |  |  |  |  |
| <b>5</b> | Payment or honoraria for lectures, presentations, speakers bureaus, manuscript writing or educational events | <input checked="" type="checkbox"/> <b>None</b><br><table border="1" data-bbox="437 853 1011 958"> <tr><td> </td><td> </td></tr> <tr><td> </td><td> </td></tr> <tr><td> </td><td> </td></tr> </table>   |  |  |  |  |  |  |
|          |                                                                                                              |                                                                                                                                                                                                         |  |  |  |  |  |  |
|          |                                                                                                              |                                                                                                                                                                                                         |  |  |  |  |  |  |
|          |                                                                                                              |                                                                                                                                                                                                         |  |  |  |  |  |  |
| <b>6</b> | Payment for expert testimony                                                                                 | <input checked="" type="checkbox"/> <b>None</b><br><table border="1" data-bbox="437 1200 1011 1305"> <tr><td> </td><td> </td></tr> <tr><td> </td><td> </td></tr> <tr><td> </td><td> </td></tr> </table> |  |  |  |  |  |  |
|          |                                                                                                              |                                                                                                                                                                                                         |  |  |  |  |  |  |
|          |                                                                                                              |                                                                                                                                                                                                         |  |  |  |  |  |  |
|          |                                                                                                              |                                                                                                                                                                                                         |  |  |  |  |  |  |
| <b>7</b> | Support for attending meetings and/or travel                                                                 | <input checked="" type="checkbox"/> <b>None</b><br><table border="1" data-bbox="437 1413 1011 1518"> <tr><td> </td><td> </td></tr> <tr><td> </td><td> </td></tr> <tr><td> </td><td> </td></tr> </table> |  |  |  |  |  |  |
|          |                                                                                                              |                                                                                                                                                                                                         |  |  |  |  |  |  |
|          |                                                                                                              |                                                                                                                                                                                                         |  |  |  |  |  |  |
|          |                                                                                                              |                                                                                                                                                                                                         |  |  |  |  |  |  |
| <b>8</b> | Patents planned, issued or pending                                                                           | <input checked="" type="checkbox"/> <b>None</b><br><table border="1" data-bbox="437 1637 1011 1742"> <tr><td> </td><td> </td></tr> <tr><td> </td><td> </td></tr> <tr><td> </td><td> </td></tr> </table> |  |  |  |  |  |  |
|          |                                                                                                              |                                                                                                                                                                                                         |  |  |  |  |  |  |
|          |                                                                                                              |                                                                                                                                                                                                         |  |  |  |  |  |  |
|          |                                                                                                              |                                                                                                                                                                                                         |  |  |  |  |  |  |
| <b>9</b> | Participation on a Data Safety Monitoring Board or Advisory Board                                            | <input checked="" type="checkbox"/> <b>None</b><br><table border="1" data-bbox="437 1861 1011 1966"> <tr><td> </td><td> </td></tr> <tr><td> </td><td> </td></tr> <tr><td> </td><td> </td></tr> </table> |  |  |  |  |  |  |
|          |                                                                                                              |                                                                                                                                                                                                         |  |  |  |  |  |  |
|          |                                                                                                              |                                                                                                                                                                                                         |  |  |  |  |  |  |
|          |                                                                                                              |                                                                                                                                                                                                         |  |  |  |  |  |  |



|           |                                                                                                   | Name all entities with whom you have this relationship or indicate none (add rows as needed) | Specifications/Comments (e.g., if payments were made to you or to your institution) |
|-----------|---------------------------------------------------------------------------------------------------|----------------------------------------------------------------------------------------------|-------------------------------------------------------------------------------------|
| <b>10</b> | Leadership or fiduciary role in other board, society, committee or advocacy group, paid or unpaid | <input checked="" type="checkbox"/> <b>None</b>                                              |                                                                                     |
|           |                                                                                                   |                                                                                              |                                                                                     |
|           |                                                                                                   |                                                                                              |                                                                                     |
| <b>11</b> | Stock or stock options                                                                            | <input checked="" type="checkbox"/> <b>None</b>                                              |                                                                                     |
|           |                                                                                                   |                                                                                              |                                                                                     |
|           |                                                                                                   |                                                                                              |                                                                                     |
| <b>12</b> | Receipt of equipment, materials, drugs, medical writing, gifts or other services                  | <input checked="" type="checkbox"/> <b>None</b>                                              |                                                                                     |
|           |                                                                                                   |                                                                                              |                                                                                     |
|           |                                                                                                   |                                                                                              |                                                                                     |
| <b>13</b> | Other financial or non-financial interests                                                        | <input checked="" type="checkbox"/> <b>None</b>                                              |                                                                                     |
|           |                                                                                                   |                                                                                              |                                                                                     |
|           |                                                                                                   |                                                                                              |                                                                                     |

Please place an "X" next to the following statement to indicate your agreement:

I certify that I have answered every question and have not altered the wording of any of the questions on this form.

## ICMJE DISCLOSURE FORM

**Date:** 9/15/2022

**Your Name:** Prof. Dr. Beate Grüner

**Manuscript Title:** One-year follow-up of the CAPSID randomized trial for high-dose convalescent plasma in severe COVID-19 patients

**Manuscript Number (if known):** 163657-JCI-CMED-RV-2

In the interest of transparency, we ask you to disclose all relationships/activities/interests listed below that are related to the content of your manuscript. "Related" means any relation with for-profit or not-for-profit third parties whose interests may be affected by the content of the manuscript. Disclosure represents a commitment to transparency and does not necessarily indicate a bias. If you are in doubt about whether to list a relationship/activity/interest, it is preferable that you do so.

The author's relationships/activities/interests should be defined broadly. For example, if your manuscript pertains to the epidemiology of hypertension, you should declare all relationships with manufacturers of antihypertensive medication, even if that medication is not mentioned in the manuscript.

In item #1 below, report all support for the work reported in this manuscript without time limit. For all other items, the time frame for disclosure is the past 36 months.

|                                                                                                                                  | Name all entities with whom you have this relationship or indicate none (add rows as needed)                                                                                   | Specifications/Comments (e.g., if payments were made to you or to your institution)                                                                                                                                                                                                                                                                                                                                                                                                                                                                                                                                                                                                                                                                                                                                                      |                                                                                                                                  |                                                                                                                                                                           |  |                                                                                                                      |  |                                                 |  |                                                                 |
|----------------------------------------------------------------------------------------------------------------------------------|--------------------------------------------------------------------------------------------------------------------------------------------------------------------------------|------------------------------------------------------------------------------------------------------------------------------------------------------------------------------------------------------------------------------------------------------------------------------------------------------------------------------------------------------------------------------------------------------------------------------------------------------------------------------------------------------------------------------------------------------------------------------------------------------------------------------------------------------------------------------------------------------------------------------------------------------------------------------------------------------------------------------------------|----------------------------------------------------------------------------------------------------------------------------------|---------------------------------------------------------------------------------------------------------------------------------------------------------------------------|--|----------------------------------------------------------------------------------------------------------------------|--|-------------------------------------------------|--|-----------------------------------------------------------------|
| Time frame: Since the initial planning of the work                                                                               |                                                                                                                                                                                |                                                                                                                                                                                                                                                                                                                                                                                                                                                                                                                                                                                                                                                                                                                                                                                                                                          |                                                                                                                                  |                                                                                                                                                                           |  |                                                                                                                      |  |                                                 |  |                                                                 |
| <b>1</b>                                                                                                                         | All support for the present manuscript (e.g., funding, provision of study materials, medical writing, article processing charges, etc.)<br><b>No time limit for this item.</b> | <input type="checkbox"/> <b>None</b><br><br><table border="1" style="width: 100%; border-collapse: collapse;"> <tr> <td style="width: 60%;">General funding started in 01.04.2020 and ended 31.05.2022<br/><b>German Federal Ministry of Health funded the clinical trial</b></td> <td style="width: 40%;">German Federal Ministry of Health funded the clinical trial. Expense reimbursement for patient treatment paid by the sponsor DRK Blutspendedienst Baden-Württemberg Hesse</td> </tr> <tr> <td></td> <td>up to 4400 € per patient treated within the first part of the trial<br/>2000 € set up fee for initiation of the trial</td> </tr> <tr> <td></td> <td>up to 885 € per patient in the follow up period</td> </tr> <tr> <td></td> <td>All paid to participating institution [not to the investigator]</td> </tr> </table> | General funding started in 01.04.2020 and ended 31.05.2022<br><b>German Federal Ministry of Health funded the clinical trial</b> | German Federal Ministry of Health funded the clinical trial. Expense reimbursement for patient treatment paid by the sponsor DRK Blutspendedienst Baden-Württemberg Hesse |  | up to 4400 € per patient treated within the first part of the trial<br>2000 € set up fee for initiation of the trial |  | up to 885 € per patient in the follow up period |  | All paid to participating institution [not to the investigator] |
| General funding started in 01.04.2020 and ended 31.05.2022<br><b>German Federal Ministry of Health funded the clinical trial</b> | German Federal Ministry of Health funded the clinical trial. Expense reimbursement for patient treatment paid by the sponsor DRK Blutspendedienst Baden-Württemberg Hesse      |                                                                                                                                                                                                                                                                                                                                                                                                                                                                                                                                                                                                                                                                                                                                                                                                                                          |                                                                                                                                  |                                                                                                                                                                           |  |                                                                                                                      |  |                                                 |  |                                                                 |
|                                                                                                                                  | up to 4400 € per patient treated within the first part of the trial<br>2000 € set up fee for initiation of the trial                                                           |                                                                                                                                                                                                                                                                                                                                                                                                                                                                                                                                                                                                                                                                                                                                                                                                                                          |                                                                                                                                  |                                                                                                                                                                           |  |                                                                                                                      |  |                                                 |  |                                                                 |
|                                                                                                                                  | up to 885 € per patient in the follow up period                                                                                                                                |                                                                                                                                                                                                                                                                                                                                                                                                                                                                                                                                                                                                                                                                                                                                                                                                                                          |                                                                                                                                  |                                                                                                                                                                           |  |                                                                                                                      |  |                                                 |  |                                                                 |
|                                                                                                                                  | All paid to participating institution [not to the investigator]                                                                                                                |                                                                                                                                                                                                                                                                                                                                                                                                                                                                                                                                                                                                                                                                                                                                                                                                                                          |                                                                                                                                  |                                                                                                                                                                           |  |                                                                                                                      |  |                                                 |  |                                                                 |
| Time frame: past 36 months                                                                                                       |                                                                                                                                                                                |                                                                                                                                                                                                                                                                                                                                                                                                                                                                                                                                                                                                                                                                                                                                                                                                                                          |                                                                                                                                  |                                                                                                                                                                           |  |                                                                                                                      |  |                                                 |  |                                                                 |
| <b>2</b>                                                                                                                         | Grants or contracts from any entity (if not indicated in item #1 above).                                                                                                       | <input checked="" type="checkbox"/> <b>None</b><br><br><table border="1" style="width: 100%; border-collapse: collapse;"> <tr><td style="width: 60%; height: 20px;"></td><td style="width: 40%;"></td></tr> <tr><td style="height: 20px;"></td><td></td></tr> <tr><td style="height: 20px;"></td><td></td></tr> </table>                                                                                                                                                                                                                                                                                                                                                                                                                                                                                                                 |                                                                                                                                  |                                                                                                                                                                           |  |                                                                                                                      |  |                                                 |  |                                                                 |
|                                                                                                                                  |                                                                                                                                                                                |                                                                                                                                                                                                                                                                                                                                                                                                                                                                                                                                                                                                                                                                                                                                                                                                                                          |                                                                                                                                  |                                                                                                                                                                           |  |                                                                                                                      |  |                                                 |  |                                                                 |
|                                                                                                                                  |                                                                                                                                                                                |                                                                                                                                                                                                                                                                                                                                                                                                                                                                                                                                                                                                                                                                                                                                                                                                                                          |                                                                                                                                  |                                                                                                                                                                           |  |                                                                                                                      |  |                                                 |  |                                                                 |
|                                                                                                                                  |                                                                                                                                                                                |                                                                                                                                                                                                                                                                                                                                                                                                                                                                                                                                                                                                                                                                                                                                                                                                                                          |                                                                                                                                  |                                                                                                                                                                           |  |                                                                                                                      |  |                                                 |  |                                                                 |

|          | Name all entities with whom you have this relationship or indicate none (add rows as needed)                 | Specifications/Comments (e.g., if payments were made to you or to your institution)                                                                                                               |  |  |  |  |  |  |
|----------|--------------------------------------------------------------------------------------------------------------|---------------------------------------------------------------------------------------------------------------------------------------------------------------------------------------------------|--|--|--|--|--|--|
| <b>3</b> | Royalties or licenses                                                                                        | <input checked="" type="checkbox"/> <b>None</b><br><table border="1" data-bbox="437 383 1520 488"> <tr><td></td><td></td></tr> <tr><td></td><td></td></tr> <tr><td></td><td></td></tr> </table>   |  |  |  |  |  |  |
|          |                                                                                                              |                                                                                                                                                                                                   |  |  |  |  |  |  |
|          |                                                                                                              |                                                                                                                                                                                                   |  |  |  |  |  |  |
|          |                                                                                                              |                                                                                                                                                                                                   |  |  |  |  |  |  |
| <b>4</b> | Consulting fees                                                                                              | <input checked="" type="checkbox"/> <b>None</b><br><table border="1" data-bbox="437 629 1520 734"> <tr><td></td><td></td></tr> <tr><td></td><td></td></tr> <tr><td></td><td></td></tr> </table>   |  |  |  |  |  |  |
|          |                                                                                                              |                                                                                                                                                                                                   |  |  |  |  |  |  |
|          |                                                                                                              |                                                                                                                                                                                                   |  |  |  |  |  |  |
|          |                                                                                                              |                                                                                                                                                                                                   |  |  |  |  |  |  |
| <b>5</b> | Payment or honoraria for lectures, presentations, speakers bureaus, manuscript writing or educational events | <input checked="" type="checkbox"/> <b>None</b><br><table border="1" data-bbox="437 853 1520 958"> <tr><td></td><td></td></tr> <tr><td></td><td></td></tr> <tr><td></td><td></td></tr> </table>   |  |  |  |  |  |  |
|          |                                                                                                              |                                                                                                                                                                                                   |  |  |  |  |  |  |
|          |                                                                                                              |                                                                                                                                                                                                   |  |  |  |  |  |  |
|          |                                                                                                              |                                                                                                                                                                                                   |  |  |  |  |  |  |
| <b>6</b> | Payment for expert testimony                                                                                 | <input checked="" type="checkbox"/> <b>None</b><br><table border="1" data-bbox="437 1200 1520 1305"> <tr><td></td><td></td></tr> <tr><td></td><td></td></tr> <tr><td></td><td></td></tr> </table> |  |  |  |  |  |  |
|          |                                                                                                              |                                                                                                                                                                                                   |  |  |  |  |  |  |
|          |                                                                                                              |                                                                                                                                                                                                   |  |  |  |  |  |  |
|          |                                                                                                              |                                                                                                                                                                                                   |  |  |  |  |  |  |
| <b>7</b> | Support for attending meetings and/or travel                                                                 | <input checked="" type="checkbox"/> <b>None</b><br><table border="1" data-bbox="437 1413 1520 1518"> <tr><td></td><td></td></tr> <tr><td></td><td></td></tr> <tr><td></td><td></td></tr> </table> |  |  |  |  |  |  |
|          |                                                                                                              |                                                                                                                                                                                                   |  |  |  |  |  |  |
|          |                                                                                                              |                                                                                                                                                                                                   |  |  |  |  |  |  |
|          |                                                                                                              |                                                                                                                                                                                                   |  |  |  |  |  |  |
| <b>8</b> | Patents planned, issued or pending                                                                           | <input checked="" type="checkbox"/> <b>None</b><br><table border="1" data-bbox="437 1637 1520 1742"> <tr><td></td><td></td></tr> <tr><td></td><td></td></tr> <tr><td></td><td></td></tr> </table> |  |  |  |  |  |  |
|          |                                                                                                              |                                                                                                                                                                                                   |  |  |  |  |  |  |
|          |                                                                                                              |                                                                                                                                                                                                   |  |  |  |  |  |  |
|          |                                                                                                              |                                                                                                                                                                                                   |  |  |  |  |  |  |
| <b>9</b> | Participation on a Data Safety Monitoring Board or Advisory Board                                            | <input checked="" type="checkbox"/> <b>None</b><br><table border="1" data-bbox="437 1861 1520 1966"> <tr><td></td><td></td></tr> <tr><td></td><td></td></tr> <tr><td></td><td></td></tr> </table> |  |  |  |  |  |  |
|          |                                                                                                              |                                                                                                                                                                                                   |  |  |  |  |  |  |
|          |                                                                                                              |                                                                                                                                                                                                   |  |  |  |  |  |  |
|          |                                                                                                              |                                                                                                                                                                                                   |  |  |  |  |  |  |

|        |                                                                                                   | Name all entities with whom you have this relationship or indicate none (add rows as needed) | Specifications/Comments (e.g., if payments were made to you or to your institution) |
|--------|---------------------------------------------------------------------------------------------------|----------------------------------------------------------------------------------------------|-------------------------------------------------------------------------------------|
| 1<br>0 | Leadership or fiduciary role in other board, society, committee or advocacy group, paid or unpaid | <input checked="" type="checkbox"/> None                                                     |                                                                                     |
|        |                                                                                                   |                                                                                              |                                                                                     |
|        |                                                                                                   |                                                                                              |                                                                                     |
|        |                                                                                                   |                                                                                              |                                                                                     |
| 1<br>1 | Stock or stock options                                                                            | <input checked="" type="checkbox"/> None                                                     |                                                                                     |
|        |                                                                                                   |                                                                                              |                                                                                     |
|        |                                                                                                   |                                                                                              |                                                                                     |
|        |                                                                                                   |                                                                                              |                                                                                     |
| 1<br>2 | Receipt of equipment, materials, drugs, medical writing, gifts or other services                  | <input checked="" type="checkbox"/> None                                                     |                                                                                     |
|        |                                                                                                   |                                                                                              |                                                                                     |
|        |                                                                                                   |                                                                                              |                                                                                     |
|        |                                                                                                   |                                                                                              |                                                                                     |
| 1<br>3 | Other financial or non-financial interests                                                        | <input checked="" type="checkbox"/> None                                                     |                                                                                     |
|        |                                                                                                   |                                                                                              |                                                                                     |
|        |                                                                                                   |                                                                                              |                                                                                     |
|        |                                                                                                   |                                                                                              |                                                                                     |

Please place an "X" next to the following statement to indicate your agreement:

I certify that I have answered every question and have not altered the wording of any of the questions on this form.

## ICMJE DISCLOSURE FORM

**Date:** 9/15/2022

**Your Name:** Prof. Dr. Martin Bentz

**Manuscript Title:** One-year follow-up of the CAPSID randomized trial for high-dose convalescent plasma in severe COVID-19 patients

**Manuscript Number (if known):** 163657-JCI-CMED-RV-2

In the interest of transparency, we ask you to disclose all relationships/activities/interests listed below that are related to the content of your manuscript. "Related" means any relation with for-profit or not-for-profit third parties whose interests may be affected by the content of the manuscript. Disclosure represents a commitment to transparency and does not necessarily indicate a bias. If you are in doubt about whether to list a relationship/activity/interest, it is preferable that you do so.

The author's relationships/activities/interests should be defined broadly. For example, if your manuscript pertains to the epidemiology of hypertension, you should declare all relationships with manufacturers of antihypertensive medication, even if that medication is not mentioned in the manuscript.

In item #1 below, report all support for the work reported in this manuscript without time limit. For all other items, the time frame for disclosure is the past 36 months.

|                                                                                                                                  | Name all entities with whom you have this relationship or indicate none (add rows as needed)                                                                                      | Specifications/Comments (e.g., if payments were made to you or to your institution)                                                                                                                                                                                                                                                                                                                                                                                                                                                                                                                                                                                                                                                                                                                                                              |                                                                                                                                  |                                                                                                                                                                                   |  |                                                                                                                      |  |                                                 |  |                                                                 |
|----------------------------------------------------------------------------------------------------------------------------------|-----------------------------------------------------------------------------------------------------------------------------------------------------------------------------------|--------------------------------------------------------------------------------------------------------------------------------------------------------------------------------------------------------------------------------------------------------------------------------------------------------------------------------------------------------------------------------------------------------------------------------------------------------------------------------------------------------------------------------------------------------------------------------------------------------------------------------------------------------------------------------------------------------------------------------------------------------------------------------------------------------------------------------------------------|----------------------------------------------------------------------------------------------------------------------------------|-----------------------------------------------------------------------------------------------------------------------------------------------------------------------------------|--|----------------------------------------------------------------------------------------------------------------------|--|-------------------------------------------------|--|-----------------------------------------------------------------|
| Time frame: Since the initial planning of the work                                                                               |                                                                                                                                                                                   |                                                                                                                                                                                                                                                                                                                                                                                                                                                                                                                                                                                                                                                                                                                                                                                                                                                  |                                                                                                                                  |                                                                                                                                                                                   |  |                                                                                                                      |  |                                                 |  |                                                                 |
| <b>1</b>                                                                                                                         | All support for the present manuscript (e.g., funding, provision of study materials, medical writing, article processing charges, etc.)<br><b>No time limit for this item.</b>    | <input type="checkbox"/> <b>None</b><br><br><table border="1" style="width: 100%; border-collapse: collapse;"> <tr> <td style="width: 60%;">General funding started in 01.04.2020 and ended 31.05.2022<br/><b>German Federal Ministry of Health funded the clinical trial</b></td> <td style="width: 40%;"><b>German Federal Ministry of Health funded the clinical trial. Expense reimbursement for patient treatment paid by the sponsor DRK Blutspendedienst Baden-Württemberg Hessen</b></td> </tr> <tr> <td></td> <td>up to 4400 € per patient treated within the first part of the trial<br/>2000 € set up fee for initiation of the trial</td> </tr> <tr> <td></td> <td>up to 885 € per patient in the follow up period</td> </tr> <tr> <td></td> <td>All paid to participating institution [not to the investigator]</td> </tr> </table> | General funding started in 01.04.2020 and ended 31.05.2022<br><b>German Federal Ministry of Health funded the clinical trial</b> | <b>German Federal Ministry of Health funded the clinical trial. Expense reimbursement for patient treatment paid by the sponsor DRK Blutspendedienst Baden-Württemberg Hessen</b> |  | up to 4400 € per patient treated within the first part of the trial<br>2000 € set up fee for initiation of the trial |  | up to 885 € per patient in the follow up period |  | All paid to participating institution [not to the investigator] |
| General funding started in 01.04.2020 and ended 31.05.2022<br><b>German Federal Ministry of Health funded the clinical trial</b> | <b>German Federal Ministry of Health funded the clinical trial. Expense reimbursement for patient treatment paid by the sponsor DRK Blutspendedienst Baden-Württemberg Hessen</b> |                                                                                                                                                                                                                                                                                                                                                                                                                                                                                                                                                                                                                                                                                                                                                                                                                                                  |                                                                                                                                  |                                                                                                                                                                                   |  |                                                                                                                      |  |                                                 |  |                                                                 |
|                                                                                                                                  | up to 4400 € per patient treated within the first part of the trial<br>2000 € set up fee for initiation of the trial                                                              |                                                                                                                                                                                                                                                                                                                                                                                                                                                                                                                                                                                                                                                                                                                                                                                                                                                  |                                                                                                                                  |                                                                                                                                                                                   |  |                                                                                                                      |  |                                                 |  |                                                                 |
|                                                                                                                                  | up to 885 € per patient in the follow up period                                                                                                                                   |                                                                                                                                                                                                                                                                                                                                                                                                                                                                                                                                                                                                                                                                                                                                                                                                                                                  |                                                                                                                                  |                                                                                                                                                                                   |  |                                                                                                                      |  |                                                 |  |                                                                 |
|                                                                                                                                  | All paid to participating institution [not to the investigator]                                                                                                                   |                                                                                                                                                                                                                                                                                                                                                                                                                                                                                                                                                                                                                                                                                                                                                                                                                                                  |                                                                                                                                  |                                                                                                                                                                                   |  |                                                                                                                      |  |                                                 |  |                                                                 |
| Time frame: past 36 months                                                                                                       |                                                                                                                                                                                   |                                                                                                                                                                                                                                                                                                                                                                                                                                                                                                                                                                                                                                                                                                                                                                                                                                                  |                                                                                                                                  |                                                                                                                                                                                   |  |                                                                                                                      |  |                                                 |  |                                                                 |
| <b>2</b>                                                                                                                         | Grants or contracts from any entity (if not indicated in item #1 above).                                                                                                          | <input checked="" type="checkbox"/> <b>None</b><br><br><table border="1" style="width: 100%; border-collapse: collapse;"> <tr><td style="width: 60%; height: 20px;"></td><td style="width: 40%;"></td></tr> <tr><td style="height: 20px;"></td><td></td></tr> <tr><td style="height: 20px;"></td><td></td></tr> </table>                                                                                                                                                                                                                                                                                                                                                                                                                                                                                                                         |                                                                                                                                  |                                                                                                                                                                                   |  |                                                                                                                      |  |                                                 |  |                                                                 |
|                                                                                                                                  |                                                                                                                                                                                   |                                                                                                                                                                                                                                                                                                                                                                                                                                                                                                                                                                                                                                                                                                                                                                                                                                                  |                                                                                                                                  |                                                                                                                                                                                   |  |                                                                                                                      |  |                                                 |  |                                                                 |
|                                                                                                                                  |                                                                                                                                                                                   |                                                                                                                                                                                                                                                                                                                                                                                                                                                                                                                                                                                                                                                                                                                                                                                                                                                  |                                                                                                                                  |                                                                                                                                                                                   |  |                                                                                                                      |  |                                                 |  |                                                                 |
|                                                                                                                                  |                                                                                                                                                                                   |                                                                                                                                                                                                                                                                                                                                                                                                                                                                                                                                                                                                                                                                                                                                                                                                                                                  |                                                                                                                                  |                                                                                                                                                                                   |  |                                                                                                                      |  |                                                 |  |                                                                 |

|   | Name all entities with whom you have this relationship or indicate none (add rows as needed)                 | Specifications/Comments (e.g., if payments were made to you or to your institution)                                                                                                                     |  |  |  |  |  |  |
|---|--------------------------------------------------------------------------------------------------------------|---------------------------------------------------------------------------------------------------------------------------------------------------------------------------------------------------------|--|--|--|--|--|--|
| 3 | Royalties or licenses                                                                                        | <input checked="" type="checkbox"/> <b>None</b><br><table border="1" data-bbox="437 383 1011 488"> <tr><td> </td><td> </td></tr> <tr><td> </td><td> </td></tr> <tr><td> </td><td> </td></tr> </table>   |  |  |  |  |  |  |
|   |                                                                                                              |                                                                                                                                                                                                         |  |  |  |  |  |  |
|   |                                                                                                              |                                                                                                                                                                                                         |  |  |  |  |  |  |
|   |                                                                                                              |                                                                                                                                                                                                         |  |  |  |  |  |  |
| 4 | Consulting fees                                                                                              | <input checked="" type="checkbox"/> <b>None</b><br><table border="1" data-bbox="437 629 1011 734"> <tr><td> </td><td> </td></tr> <tr><td> </td><td> </td></tr> <tr><td> </td><td> </td></tr> </table>   |  |  |  |  |  |  |
|   |                                                                                                              |                                                                                                                                                                                                         |  |  |  |  |  |  |
|   |                                                                                                              |                                                                                                                                                                                                         |  |  |  |  |  |  |
|   |                                                                                                              |                                                                                                                                                                                                         |  |  |  |  |  |  |
| 5 | Payment or honoraria for lectures, presentations, speakers bureaus, manuscript writing or educational events | <input checked="" type="checkbox"/> <b>None</b><br><table border="1" data-bbox="437 853 1011 958"> <tr><td> </td><td> </td></tr> <tr><td> </td><td> </td></tr> <tr><td> </td><td> </td></tr> </table>   |  |  |  |  |  |  |
|   |                                                                                                              |                                                                                                                                                                                                         |  |  |  |  |  |  |
|   |                                                                                                              |                                                                                                                                                                                                         |  |  |  |  |  |  |
|   |                                                                                                              |                                                                                                                                                                                                         |  |  |  |  |  |  |
| 6 | Payment for expert testimony                                                                                 | <input checked="" type="checkbox"/> <b>None</b><br><table border="1" data-bbox="437 1200 1011 1305"> <tr><td> </td><td> </td></tr> <tr><td> </td><td> </td></tr> <tr><td> </td><td> </td></tr> </table> |  |  |  |  |  |  |
|   |                                                                                                              |                                                                                                                                                                                                         |  |  |  |  |  |  |
|   |                                                                                                              |                                                                                                                                                                                                         |  |  |  |  |  |  |
|   |                                                                                                              |                                                                                                                                                                                                         |  |  |  |  |  |  |
| 7 | Support for attending meetings and/or travel                                                                 | <input checked="" type="checkbox"/> <b>None</b><br><table border="1" data-bbox="437 1413 1011 1518"> <tr><td> </td><td> </td></tr> <tr><td> </td><td> </td></tr> <tr><td> </td><td> </td></tr> </table> |  |  |  |  |  |  |
|   |                                                                                                              |                                                                                                                                                                                                         |  |  |  |  |  |  |
|   |                                                                                                              |                                                                                                                                                                                                         |  |  |  |  |  |  |
|   |                                                                                                              |                                                                                                                                                                                                         |  |  |  |  |  |  |
| 8 | Patents planned, issued or pending                                                                           | <input checked="" type="checkbox"/> <b>None</b><br><table border="1" data-bbox="437 1637 1011 1742"> <tr><td> </td><td> </td></tr> <tr><td> </td><td> </td></tr> <tr><td> </td><td> </td></tr> </table> |  |  |  |  |  |  |
|   |                                                                                                              |                                                                                                                                                                                                         |  |  |  |  |  |  |
|   |                                                                                                              |                                                                                                                                                                                                         |  |  |  |  |  |  |
|   |                                                                                                              |                                                                                                                                                                                                         |  |  |  |  |  |  |
| 9 | Participation on a Data Safety Monitoring Board or Advisory Board                                            | <input checked="" type="checkbox"/> <b>None</b><br><table border="1" data-bbox="437 1861 1011 1966"> <tr><td> </td><td> </td></tr> <tr><td> </td><td> </td></tr> <tr><td> </td><td> </td></tr> </table> |  |  |  |  |  |  |
|   |                                                                                                              |                                                                                                                                                                                                         |  |  |  |  |  |  |
|   |                                                                                                              |                                                                                                                                                                                                         |  |  |  |  |  |  |
|   |                                                                                                              |                                                                                                                                                                                                         |  |  |  |  |  |  |

|           | Name all entities with whom you have this relationship or indicate none (add rows as needed)      | Specifications/Comments (e.g., if payments were made to you or to your institution)                                                                                |  |  |  |  |  |  |
|-----------|---------------------------------------------------------------------------------------------------|--------------------------------------------------------------------------------------------------------------------------------------------------------------------|--|--|--|--|--|--|
| <b>10</b> | Leadership or fiduciary role in other board, society, committee or advocacy group, paid or unpaid | <input checked="" type="checkbox"/> <b>None</b><br><table border="1"> <tr><td></td><td></td></tr> <tr><td></td><td></td></tr> <tr><td></td><td></td></tr> </table> |  |  |  |  |  |  |
|           |                                                                                                   |                                                                                                                                                                    |  |  |  |  |  |  |
|           |                                                                                                   |                                                                                                                                                                    |  |  |  |  |  |  |
|           |                                                                                                   |                                                                                                                                                                    |  |  |  |  |  |  |
| <b>11</b> | Stock or stock options                                                                            | <input checked="" type="checkbox"/> <b>None</b><br><table border="1"> <tr><td></td><td></td></tr> <tr><td></td><td></td></tr> <tr><td></td><td></td></tr> </table> |  |  |  |  |  |  |
|           |                                                                                                   |                                                                                                                                                                    |  |  |  |  |  |  |
|           |                                                                                                   |                                                                                                                                                                    |  |  |  |  |  |  |
|           |                                                                                                   |                                                                                                                                                                    |  |  |  |  |  |  |
| <b>12</b> | Receipt of equipment, materials, drugs, medical writing, gifts or other services                  | <input checked="" type="checkbox"/> <b>None</b><br><table border="1"> <tr><td></td><td></td></tr> <tr><td></td><td></td></tr> <tr><td></td><td></td></tr> </table> |  |  |  |  |  |  |
|           |                                                                                                   |                                                                                                                                                                    |  |  |  |  |  |  |
|           |                                                                                                   |                                                                                                                                                                    |  |  |  |  |  |  |
|           |                                                                                                   |                                                                                                                                                                    |  |  |  |  |  |  |
| <b>13</b> | Other financial or non-financial interests                                                        | <input checked="" type="checkbox"/> <b>None</b><br><table border="1"> <tr><td></td><td></td></tr> <tr><td></td><td></td></tr> <tr><td></td><td></td></tr> </table> |  |  |  |  |  |  |
|           |                                                                                                   |                                                                                                                                                                    |  |  |  |  |  |  |
|           |                                                                                                   |                                                                                                                                                                    |  |  |  |  |  |  |
|           |                                                                                                   |                                                                                                                                                                    |  |  |  |  |  |  |

Please place an "X" next to the following statement to indicate your agreement:

I certify that I have answered every question and have not altered the wording of any of the questions on this form.

## ICMJE DISCLOSURE FORM

**Date:** 9/15/2022

**Your Name:** Prof. Dr. Bernd Jahrsdörfer

**Manuscript Title:** One-year follow-up of the CAPSID randomized trial for high-dose convalescent plasma in severe COVID-19 patients

**Manuscript Number (if known):** 163657-JCI-CMED-RV-2

In the interest of transparency, we ask you to disclose all relationships/activities/interests listed below that are related to the content of your manuscript. "Related" means any relation with for-profit or not-for-profit third parties whose interests may be affected by the content of the manuscript. Disclosure represents a commitment to transparency and does not necessarily indicate a bias. If you are in doubt about whether to list a relationship/activity/interest, it is preferable that you do so.

The author's relationships/activities/interests should be defined broadly. For example, if your manuscript pertains to the epidemiology of hypertension, you should declare all relationships with manufacturers of antihypertensive medication, even if that medication is not mentioned in the manuscript.

In item #1 below, report all support for the work reported in this manuscript without time limit. For all other items, the time frame for disclosure is the past 36 months.

|                                                                                                                                  |                                                                                                                                                                                | <b>Name all entities with whom you have this relationship or indicate none (add rows as needed)</b>                                                                                                                                                                                                                                                                                                                                                                                                                                                                                                                                                                                                                                                                                                                 | <b>Specifications/Comments (e.g., if payments were made to you or to your institution)</b>                                       |                                                                                                                                                                          |  |                                                                                                     |  |                                               |  |                                                                 |  |
|----------------------------------------------------------------------------------------------------------------------------------|--------------------------------------------------------------------------------------------------------------------------------------------------------------------------------|---------------------------------------------------------------------------------------------------------------------------------------------------------------------------------------------------------------------------------------------------------------------------------------------------------------------------------------------------------------------------------------------------------------------------------------------------------------------------------------------------------------------------------------------------------------------------------------------------------------------------------------------------------------------------------------------------------------------------------------------------------------------------------------------------------------------|----------------------------------------------------------------------------------------------------------------------------------|--------------------------------------------------------------------------------------------------------------------------------------------------------------------------|--|-----------------------------------------------------------------------------------------------------|--|-----------------------------------------------|--|-----------------------------------------------------------------|--|
| <b>Time frame: Since the initial planning of the work</b>                                                                        |                                                                                                                                                                                |                                                                                                                                                                                                                                                                                                                                                                                                                                                                                                                                                                                                                                                                                                                                                                                                                     |                                                                                                                                  |                                                                                                                                                                          |  |                                                                                                     |  |                                               |  |                                                                 |  |
| <b>1</b>                                                                                                                         | All support for the present manuscript (e.g., funding, provision of study materials, medical writing, article processing charges, etc.)<br><b>No time limit for this item.</b> | <input type="checkbox"/> <b>None</b><br><br><table border="1" style="width: 100%; border-collapse: collapse;"> <tr> <td style="width: 60%;">General funding started in 01.04.2020 and ended 31.05.2022<br/><b>German Federal Ministry of Health funded the clinical trial</b></td> <td style="width: 40%;">German Federal Ministry of Health funded the clinical trial. Expense reimbursement for patient treatment paid by the sponsor DRK Blutspendedienst Baden-Württemberg Hess</td> </tr> <tr> <td></td> <td>up to 630 € per enrolled donor including first plasmapheresis, 420 € per subsequent plasma donation</td> </tr> <tr> <td></td> <td>up to 310 € per donor in the follow up period</td> </tr> <tr> <td></td> <td>All paid to participating institution [not to the investigator]</td> </tr> </table> | General funding started in 01.04.2020 and ended 31.05.2022<br><b>German Federal Ministry of Health funded the clinical trial</b> | German Federal Ministry of Health funded the clinical trial. Expense reimbursement for patient treatment paid by the sponsor DRK Blutspendedienst Baden-Württemberg Hess |  | up to 630 € per enrolled donor including first plasmapheresis, 420 € per subsequent plasma donation |  | up to 310 € per donor in the follow up period |  | All paid to participating institution [not to the investigator] |  |
| General funding started in 01.04.2020 and ended 31.05.2022<br><b>German Federal Ministry of Health funded the clinical trial</b> | German Federal Ministry of Health funded the clinical trial. Expense reimbursement for patient treatment paid by the sponsor DRK Blutspendedienst Baden-Württemberg Hess       |                                                                                                                                                                                                                                                                                                                                                                                                                                                                                                                                                                                                                                                                                                                                                                                                                     |                                                                                                                                  |                                                                                                                                                                          |  |                                                                                                     |  |                                               |  |                                                                 |  |
|                                                                                                                                  | up to 630 € per enrolled donor including first plasmapheresis, 420 € per subsequent plasma donation                                                                            |                                                                                                                                                                                                                                                                                                                                                                                                                                                                                                                                                                                                                                                                                                                                                                                                                     |                                                                                                                                  |                                                                                                                                                                          |  |                                                                                                     |  |                                               |  |                                                                 |  |
|                                                                                                                                  | up to 310 € per donor in the follow up period                                                                                                                                  |                                                                                                                                                                                                                                                                                                                                                                                                                                                                                                                                                                                                                                                                                                                                                                                                                     |                                                                                                                                  |                                                                                                                                                                          |  |                                                                                                     |  |                                               |  |                                                                 |  |
|                                                                                                                                  | All paid to participating institution [not to the investigator]                                                                                                                |                                                                                                                                                                                                                                                                                                                                                                                                                                                                                                                                                                                                                                                                                                                                                                                                                     |                                                                                                                                  |                                                                                                                                                                          |  |                                                                                                     |  |                                               |  |                                                                 |  |
| <b>Time frame: past 36 months</b>                                                                                                |                                                                                                                                                                                |                                                                                                                                                                                                                                                                                                                                                                                                                                                                                                                                                                                                                                                                                                                                                                                                                     |                                                                                                                                  |                                                                                                                                                                          |  |                                                                                                     |  |                                               |  |                                                                 |  |
| <b>2</b>                                                                                                                         | Grants or contracts from any entity (if not indicated in item #1 above).                                                                                                       | <input checked="" type="checkbox"/> <b>None</b><br><br><table border="1" style="width: 100%; border-collapse: collapse;"> <tr><td style="width: 60%; height: 20px;"></td><td style="width: 40%;"></td></tr> <tr><td style="height: 20px;"></td><td></td></tr> <tr><td style="height: 20px;"></td><td></td></tr> </table>                                                                                                                                                                                                                                                                                                                                                                                                                                                                                            |                                                                                                                                  |                                                                                                                                                                          |  |                                                                                                     |  |                                               |  |                                                                 |  |
|                                                                                                                                  |                                                                                                                                                                                |                                                                                                                                                                                                                                                                                                                                                                                                                                                                                                                                                                                                                                                                                                                                                                                                                     |                                                                                                                                  |                                                                                                                                                                          |  |                                                                                                     |  |                                               |  |                                                                 |  |
|                                                                                                                                  |                                                                                                                                                                                |                                                                                                                                                                                                                                                                                                                                                                                                                                                                                                                                                                                                                                                                                                                                                                                                                     |                                                                                                                                  |                                                                                                                                                                          |  |                                                                                                     |  |                                               |  |                                                                 |  |
|                                                                                                                                  |                                                                                                                                                                                |                                                                                                                                                                                                                                                                                                                                                                                                                                                                                                                                                                                                                                                                                                                                                                                                                     |                                                                                                                                  |                                                                                                                                                                          |  |                                                                                                     |  |                                               |  |                                                                 |  |



|          | Name all entities with whom you have this relationship or indicate none (add rows as needed)                 | Specifications/Comments (e.g., if payments were made to you or to your institution)                                                                                                                     |  |  |  |  |  |  |
|----------|--------------------------------------------------------------------------------------------------------------|---------------------------------------------------------------------------------------------------------------------------------------------------------------------------------------------------------|--|--|--|--|--|--|
| <b>3</b> | Royalties or licenses                                                                                        | <input checked="" type="checkbox"/> <b>None</b><br><table border="1" data-bbox="437 383 1011 488"> <tr><td> </td><td> </td></tr> <tr><td> </td><td> </td></tr> <tr><td> </td><td> </td></tr> </table>   |  |  |  |  |  |  |
|          |                                                                                                              |                                                                                                                                                                                                         |  |  |  |  |  |  |
|          |                                                                                                              |                                                                                                                                                                                                         |  |  |  |  |  |  |
|          |                                                                                                              |                                                                                                                                                                                                         |  |  |  |  |  |  |
| <b>4</b> | Consulting fees                                                                                              | <input checked="" type="checkbox"/> <b>None</b><br><table border="1" data-bbox="437 629 1011 734"> <tr><td> </td><td> </td></tr> <tr><td> </td><td> </td></tr> <tr><td> </td><td> </td></tr> </table>   |  |  |  |  |  |  |
|          |                                                                                                              |                                                                                                                                                                                                         |  |  |  |  |  |  |
|          |                                                                                                              |                                                                                                                                                                                                         |  |  |  |  |  |  |
|          |                                                                                                              |                                                                                                                                                                                                         |  |  |  |  |  |  |
| <b>5</b> | Payment or honoraria for lectures, presentations, speakers bureaus, manuscript writing or educational events | <input checked="" type="checkbox"/> <b>None</b><br><table border="1" data-bbox="437 853 1011 958"> <tr><td> </td><td> </td></tr> <tr><td> </td><td> </td></tr> <tr><td> </td><td> </td></tr> </table>   |  |  |  |  |  |  |
|          |                                                                                                              |                                                                                                                                                                                                         |  |  |  |  |  |  |
|          |                                                                                                              |                                                                                                                                                                                                         |  |  |  |  |  |  |
|          |                                                                                                              |                                                                                                                                                                                                         |  |  |  |  |  |  |
| <b>6</b> | Payment for expert testimony                                                                                 | <input checked="" type="checkbox"/> <b>None</b><br><table border="1" data-bbox="437 1200 1011 1305"> <tr><td> </td><td> </td></tr> <tr><td> </td><td> </td></tr> <tr><td> </td><td> </td></tr> </table> |  |  |  |  |  |  |
|          |                                                                                                              |                                                                                                                                                                                                         |  |  |  |  |  |  |
|          |                                                                                                              |                                                                                                                                                                                                         |  |  |  |  |  |  |
|          |                                                                                                              |                                                                                                                                                                                                         |  |  |  |  |  |  |
| <b>7</b> | Support for attending meetings and/or travel                                                                 | <input checked="" type="checkbox"/> <b>None</b><br><table border="1" data-bbox="437 1413 1011 1518"> <tr><td> </td><td> </td></tr> <tr><td> </td><td> </td></tr> <tr><td> </td><td> </td></tr> </table> |  |  |  |  |  |  |
|          |                                                                                                              |                                                                                                                                                                                                         |  |  |  |  |  |  |
|          |                                                                                                              |                                                                                                                                                                                                         |  |  |  |  |  |  |
|          |                                                                                                              |                                                                                                                                                                                                         |  |  |  |  |  |  |
| <b>8</b> | Patents planned, issued or pending                                                                           | <input checked="" type="checkbox"/> <b>None</b><br><table border="1" data-bbox="437 1637 1011 1742"> <tr><td> </td><td> </td></tr> <tr><td> </td><td> </td></tr> <tr><td> </td><td> </td></tr> </table> |  |  |  |  |  |  |
|          |                                                                                                              |                                                                                                                                                                                                         |  |  |  |  |  |  |
|          |                                                                                                              |                                                                                                                                                                                                         |  |  |  |  |  |  |
|          |                                                                                                              |                                                                                                                                                                                                         |  |  |  |  |  |  |
| <b>9</b> | Participation on a Data Safety Monitoring Board or Advisory Board                                            | <input checked="" type="checkbox"/> <b>None</b><br><table border="1" data-bbox="437 1861 1011 1966"> <tr><td> </td><td> </td></tr> <tr><td> </td><td> </td></tr> <tr><td> </td><td> </td></tr> </table> |  |  |  |  |  |  |
|          |                                                                                                              |                                                                                                                                                                                                         |  |  |  |  |  |  |
|          |                                                                                                              |                                                                                                                                                                                                         |  |  |  |  |  |  |
|          |                                                                                                              |                                                                                                                                                                                                         |  |  |  |  |  |  |

|           | Name all entities with whom you have this relationship or indicate none (add rows as needed)      | Specifications/Comments (e.g., if payments were made to you or to your institution)                                                                                                                     |  |  |  |  |  |  |
|-----------|---------------------------------------------------------------------------------------------------|---------------------------------------------------------------------------------------------------------------------------------------------------------------------------------------------------------|--|--|--|--|--|--|
| <b>10</b> | Leadership or fiduciary role in other board, society, committee or advocacy group, paid or unpaid | <input checked="" type="checkbox"/> <b>None</b><br><table border="1" data-bbox="437 383 1015 488"> <tr><td> </td><td> </td></tr> <tr><td> </td><td> </td></tr> <tr><td> </td><td> </td></tr> </table>   |  |  |  |  |  |  |
|           |                                                                                                   |                                                                                                                                                                                                         |  |  |  |  |  |  |
|           |                                                                                                   |                                                                                                                                                                                                         |  |  |  |  |  |  |
|           |                                                                                                   |                                                                                                                                                                                                         |  |  |  |  |  |  |
| <b>11</b> | Stock or stock options                                                                            | <input checked="" type="checkbox"/> <b>None</b><br><table border="1" data-bbox="437 696 1015 801"> <tr><td> </td><td> </td></tr> <tr><td> </td><td> </td></tr> <tr><td> </td><td> </td></tr> </table>   |  |  |  |  |  |  |
|           |                                                                                                   |                                                                                                                                                                                                         |  |  |  |  |  |  |
|           |                                                                                                   |                                                                                                                                                                                                         |  |  |  |  |  |  |
|           |                                                                                                   |                                                                                                                                                                                                         |  |  |  |  |  |  |
| <b>12</b> | Receipt of equipment, materials, drugs, medical writing, gifts or other services                  | <input checked="" type="checkbox"/> <b>None</b><br><table border="1" data-bbox="437 916 1015 1021"> <tr><td> </td><td> </td></tr> <tr><td> </td><td> </td></tr> <tr><td> </td><td> </td></tr> </table>  |  |  |  |  |  |  |
|           |                                                                                                   |                                                                                                                                                                                                         |  |  |  |  |  |  |
|           |                                                                                                   |                                                                                                                                                                                                         |  |  |  |  |  |  |
|           |                                                                                                   |                                                                                                                                                                                                         |  |  |  |  |  |  |
| <b>13</b> | Other financial or non-financial interests                                                        | <input checked="" type="checkbox"/> <b>None</b><br><table border="1" data-bbox="437 1198 1015 1303"> <tr><td> </td><td> </td></tr> <tr><td> </td><td> </td></tr> <tr><td> </td><td> </td></tr> </table> |  |  |  |  |  |  |
|           |                                                                                                   |                                                                                                                                                                                                         |  |  |  |  |  |  |
|           |                                                                                                   |                                                                                                                                                                                                         |  |  |  |  |  |  |
|           |                                                                                                   |                                                                                                                                                                                                         |  |  |  |  |  |  |

**Please place an "X" next to the following statement to indicate your agreement:**

I certify that I have answered every question and have not altered the wording of any of the questions on this form.

## ICMJE DISCLOSURE FORM

**Date:** 9/15/2022

**Your Name:** Dr. Dzenan Kilalic

**Manuscript Title:** One-year follow-up of the CAPSID randomized trial for high-dose convalescent plasma in severe COVID-19 patients

**Manuscript Number (if known):** 163657-JCI-CMED-RV-2

In the interest of transparency, we ask you to disclose all relationships/activities/interests listed below that are related to the content of your manuscript. "Related" means any relation with for-profit or not-for-profit third parties whose interests may be affected by the content of the manuscript. Disclosure represents a commitment to transparency and does not necessarily indicate a bias. If you are in doubt about whether to list a relationship/activity/interest, it is preferable that you do so.

The author's relationships/activities/interests should be defined broadly. For example, if your manuscript pertains to the epidemiology of hypertension, you should declare all relationships with manufacturers of antihypertensive medication, even if that medication is not mentioned in the manuscript.

In item #1 below, report all support for the work reported in this manuscript without time limit. For all other items, the time frame for disclosure is the past 36 months.

|                                                                                                                                  | Name all entities with whom you have this relationship or indicate none (add rows as needed)                                                                                   | Specifications/Comments (e.g., if payments were made to you or to your institution)                                                                                                                                                                                                                                                                                                                                                                                                                                                                                                                                                                                                                                                                                                                                 |                                                                                                                                  |                                                                                                                                                                           |  |                                                                                                     |  |                                               |  |                                                                |
|----------------------------------------------------------------------------------------------------------------------------------|--------------------------------------------------------------------------------------------------------------------------------------------------------------------------------|---------------------------------------------------------------------------------------------------------------------------------------------------------------------------------------------------------------------------------------------------------------------------------------------------------------------------------------------------------------------------------------------------------------------------------------------------------------------------------------------------------------------------------------------------------------------------------------------------------------------------------------------------------------------------------------------------------------------------------------------------------------------------------------------------------------------|----------------------------------------------------------------------------------------------------------------------------------|---------------------------------------------------------------------------------------------------------------------------------------------------------------------------|--|-----------------------------------------------------------------------------------------------------|--|-----------------------------------------------|--|----------------------------------------------------------------|
| Time frame: Since the initial planning of the work                                                                               |                                                                                                                                                                                |                                                                                                                                                                                                                                                                                                                                                                                                                                                                                                                                                                                                                                                                                                                                                                                                                     |                                                                                                                                  |                                                                                                                                                                           |  |                                                                                                     |  |                                               |  |                                                                |
| <b>1</b>                                                                                                                         | All support for the present manuscript (e.g., funding, provision of study materials, medical writing, article processing charges, etc.)<br><b>No time limit for this item.</b> | <input type="checkbox"/> <b>None</b><br><br><table border="1" style="width: 100%; border-collapse: collapse;"> <tr> <td style="width: 60%;">General funding started in 01.04.2020 and ended 31.05.2022<br/><b>German Federal Ministry of Health funded the clinical trial</b></td> <td style="width: 40%;">German Federal Ministry of Health funded the clinical trial. Expense reimbursement for patient treatment paid by the sponsor DRK Blutspendedienst Baden-Württemberg Hesse</td> </tr> <tr> <td></td> <td>up to 630 € per enrolled donor including first plasmapheresis, 420 € per subsequent plasma donation</td> </tr> <tr> <td></td> <td>up to 310 € per donor in the follow up period</td> </tr> <tr> <td></td> <td>(bath paid to participating institution [not to investigator])</td> </tr> </table> | General funding started in 01.04.2020 and ended 31.05.2022<br><b>German Federal Ministry of Health funded the clinical trial</b> | German Federal Ministry of Health funded the clinical trial. Expense reimbursement for patient treatment paid by the sponsor DRK Blutspendedienst Baden-Württemberg Hesse |  | up to 630 € per enrolled donor including first plasmapheresis, 420 € per subsequent plasma donation |  | up to 310 € per donor in the follow up period |  | (bath paid to participating institution [not to investigator]) |
| General funding started in 01.04.2020 and ended 31.05.2022<br><b>German Federal Ministry of Health funded the clinical trial</b> | German Federal Ministry of Health funded the clinical trial. Expense reimbursement for patient treatment paid by the sponsor DRK Blutspendedienst Baden-Württemberg Hesse      |                                                                                                                                                                                                                                                                                                                                                                                                                                                                                                                                                                                                                                                                                                                                                                                                                     |                                                                                                                                  |                                                                                                                                                                           |  |                                                                                                     |  |                                               |  |                                                                |
|                                                                                                                                  | up to 630 € per enrolled donor including first plasmapheresis, 420 € per subsequent plasma donation                                                                            |                                                                                                                                                                                                                                                                                                                                                                                                                                                                                                                                                                                                                                                                                                                                                                                                                     |                                                                                                                                  |                                                                                                                                                                           |  |                                                                                                     |  |                                               |  |                                                                |
|                                                                                                                                  | up to 310 € per donor in the follow up period                                                                                                                                  |                                                                                                                                                                                                                                                                                                                                                                                                                                                                                                                                                                                                                                                                                                                                                                                                                     |                                                                                                                                  |                                                                                                                                                                           |  |                                                                                                     |  |                                               |  |                                                                |
|                                                                                                                                  | (bath paid to participating institution [not to investigator])                                                                                                                 |                                                                                                                                                                                                                                                                                                                                                                                                                                                                                                                                                                                                                                                                                                                                                                                                                     |                                                                                                                                  |                                                                                                                                                                           |  |                                                                                                     |  |                                               |  |                                                                |
| Time frame: past 36 months                                                                                                       |                                                                                                                                                                                |                                                                                                                                                                                                                                                                                                                                                                                                                                                                                                                                                                                                                                                                                                                                                                                                                     |                                                                                                                                  |                                                                                                                                                                           |  |                                                                                                     |  |                                               |  |                                                                |
| <b>2</b>                                                                                                                         | Grants or contracts from any entity (if not indicated in item #1 above).                                                                                                       | <input checked="" type="checkbox"/> <b>None</b><br><br><table border="1" style="width: 100%; border-collapse: collapse;"> <tr><td style="height: 20px;"> </td><td> </td></tr> <tr><td style="height: 20px;"> </td><td> </td></tr> <tr><td style="height: 20px;"> </td><td> </td></tr> </table>                                                                                                                                                                                                                                                                                                                                                                                                                                                                                                                      |                                                                                                                                  |                                                                                                                                                                           |  |                                                                                                     |  |                                               |  |                                                                |
|                                                                                                                                  |                                                                                                                                                                                |                                                                                                                                                                                                                                                                                                                                                                                                                                                                                                                                                                                                                                                                                                                                                                                                                     |                                                                                                                                  |                                                                                                                                                                           |  |                                                                                                     |  |                                               |  |                                                                |
|                                                                                                                                  |                                                                                                                                                                                |                                                                                                                                                                                                                                                                                                                                                                                                                                                                                                                                                                                                                                                                                                                                                                                                                     |                                                                                                                                  |                                                                                                                                                                           |  |                                                                                                     |  |                                               |  |                                                                |
|                                                                                                                                  |                                                                                                                                                                                |                                                                                                                                                                                                                                                                                                                                                                                                                                                                                                                                                                                                                                                                                                                                                                                                                     |                                                                                                                                  |                                                                                                                                                                           |  |                                                                                                     |  |                                               |  |                                                                |

|   | Name all entities with whom you have this relationship or indicate none (add rows as needed)                 | Specifications/Comments (e.g., if payments were made to you or to your institution)                                                                                                               |  |  |  |  |  |  |
|---|--------------------------------------------------------------------------------------------------------------|---------------------------------------------------------------------------------------------------------------------------------------------------------------------------------------------------|--|--|--|--|--|--|
| 3 | Royalties or licenses                                                                                        | <input checked="" type="checkbox"/> <b>None</b><br><table border="1" data-bbox="437 383 1519 495"> <tr><td></td><td></td></tr> <tr><td></td><td></td></tr> <tr><td></td><td></td></tr> </table>   |  |  |  |  |  |  |
|   |                                                                                                              |                                                                                                                                                                                                   |  |  |  |  |  |  |
|   |                                                                                                              |                                                                                                                                                                                                   |  |  |  |  |  |  |
|   |                                                                                                              |                                                                                                                                                                                                   |  |  |  |  |  |  |
| 4 | Consulting fees                                                                                              | <input checked="" type="checkbox"/> <b>None</b><br><table border="1" data-bbox="437 629 1519 763"> <tr><td></td><td></td></tr> <tr><td></td><td></td></tr> <tr><td></td><td></td></tr> </table>   |  |  |  |  |  |  |
|   |                                                                                                              |                                                                                                                                                                                                   |  |  |  |  |  |  |
|   |                                                                                                              |                                                                                                                                                                                                   |  |  |  |  |  |  |
|   |                                                                                                              |                                                                                                                                                                                                   |  |  |  |  |  |  |
| 5 | Payment or honoraria for lectures, presentations, speakers bureaus, manuscript writing or educational events | <input checked="" type="checkbox"/> <b>None</b><br><table border="1" data-bbox="437 853 1519 965"> <tr><td></td><td></td></tr> <tr><td></td><td></td></tr> <tr><td></td><td></td></tr> </table>   |  |  |  |  |  |  |
|   |                                                                                                              |                                                                                                                                                                                                   |  |  |  |  |  |  |
|   |                                                                                                              |                                                                                                                                                                                                   |  |  |  |  |  |  |
|   |                                                                                                              |                                                                                                                                                                                                   |  |  |  |  |  |  |
| 6 | Payment for expert testimony                                                                                 | <input checked="" type="checkbox"/> <b>None</b><br><table border="1" data-bbox="437 1200 1519 1312"> <tr><td></td><td></td></tr> <tr><td></td><td></td></tr> <tr><td></td><td></td></tr> </table> |  |  |  |  |  |  |
|   |                                                                                                              |                                                                                                                                                                                                   |  |  |  |  |  |  |
|   |                                                                                                              |                                                                                                                                                                                                   |  |  |  |  |  |  |
|   |                                                                                                              |                                                                                                                                                                                                   |  |  |  |  |  |  |
| 7 | Support for attending meetings and/or travel                                                                 | <input checked="" type="checkbox"/> <b>None</b><br><table border="1" data-bbox="437 1424 1519 1536"> <tr><td></td><td></td></tr> <tr><td></td><td></td></tr> <tr><td></td><td></td></tr> </table> |  |  |  |  |  |  |
|   |                                                                                                              |                                                                                                                                                                                                   |  |  |  |  |  |  |
|   |                                                                                                              |                                                                                                                                                                                                   |  |  |  |  |  |  |
|   |                                                                                                              |                                                                                                                                                                                                   |  |  |  |  |  |  |
| 8 | Patents planned, issued or pending                                                                           | <input checked="" type="checkbox"/> <b>None</b><br><table border="1" data-bbox="437 1637 1519 1749"> <tr><td></td><td></td></tr> <tr><td></td><td></td></tr> <tr><td></td><td></td></tr> </table> |  |  |  |  |  |  |
|   |                                                                                                              |                                                                                                                                                                                                   |  |  |  |  |  |  |
|   |                                                                                                              |                                                                                                                                                                                                   |  |  |  |  |  |  |
|   |                                                                                                              |                                                                                                                                                                                                   |  |  |  |  |  |  |
| 9 | Participation on a Data Safety Monitoring Board or Advisory Board                                            | <input checked="" type="checkbox"/> <b>None</b><br><table border="1" data-bbox="437 1861 1519 1973"> <tr><td></td><td></td></tr> <tr><td></td><td></td></tr> <tr><td></td><td></td></tr> </table> |  |  |  |  |  |  |
|   |                                                                                                              |                                                                                                                                                                                                   |  |  |  |  |  |  |
|   |                                                                                                              |                                                                                                                                                                                                   |  |  |  |  |  |  |
|   |                                                                                                              |                                                                                                                                                                                                   |  |  |  |  |  |  |

|        |                                                                                                   | Name all entities with whom you have this relationship or indicate none (add rows as needed) | Specifications/Comments (e.g., if payments were made to you or to your institution) |
|--------|---------------------------------------------------------------------------------------------------|----------------------------------------------------------------------------------------------|-------------------------------------------------------------------------------------|
| 1<br>0 | Leadership or fiduciary role in other board, society, committee or advocacy group, paid or unpaid | <input checked="" type="checkbox"/> None                                                     |                                                                                     |
|        |                                                                                                   |                                                                                              |                                                                                     |
|        |                                                                                                   |                                                                                              |                                                                                     |
|        |                                                                                                   |                                                                                              |                                                                                     |
| 1<br>1 | Stock or stock options                                                                            | <input checked="" type="checkbox"/> None                                                     |                                                                                     |
|        |                                                                                                   |                                                                                              |                                                                                     |
|        |                                                                                                   |                                                                                              |                                                                                     |
|        |                                                                                                   |                                                                                              |                                                                                     |
| 1<br>2 | Receipt of equipment, materials, drugs, medical writing, gifts or other services                  | <input checked="" type="checkbox"/> None                                                     |                                                                                     |
|        |                                                                                                   |                                                                                              |                                                                                     |
|        |                                                                                                   |                                                                                              |                                                                                     |
|        |                                                                                                   |                                                                                              |                                                                                     |
| 1<br>3 | Other financial or non-financial interests                                                        | <input checked="" type="checkbox"/> None                                                     |                                                                                     |
|        |                                                                                                   |                                                                                              |                                                                                     |
|        |                                                                                                   |                                                                                              |                                                                                     |
|        |                                                                                                   |                                                                                              |                                                                                     |

Please place an "X" next to the following statement to indicate your agreement:

I certify that I have answered every question and have not altered the wording of any of the questions on this form.

## ICMJE DISCLOSURE FORM

**Date:** 9/15/2022

**Your Name:** Prof. Dr. Ramin Lotfi

**Manuscript Title:** One-year follow-up of the CAPSID randomized trial for high-dose convalescent plasma in severe COVID-19 patients

**Manuscript Number (if known):** 163657-JCI-CMED-RV-2

In the interest of transparency, we ask you to disclose all relationships/activities/interests listed below that are related to the content of your manuscript. "Related" means any relation with for-profit or not-for-profit third parties whose interests may be affected by the content of the manuscript. Disclosure represents a commitment to transparency and does not necessarily indicate a bias. If you are in doubt about whether to list a relationship/activity/interest, it is preferable that you do so.

The author's relationships/activities/interests should be defined broadly. For example, if your manuscript pertains to the epidemiology of hypertension, you should declare all relationships with manufacturers of antihypertensive medication, even if that medication is not mentioned in the manuscript.

In item #1 below, report all support for the work reported in this manuscript without time limit. For all other items, the time frame for disclosure is the past 36 months.

|                                                                                                                                  | Name all entities with whom you have this relationship or indicate none (add rows as needed)                                                                                   | Specifications/Comments (e.g., if payments were made to you or to your institution)                                                                                                                                                                                                                                                                                                                                                                                                                                                                                                                                                                                                                                                                                                                                  |                                                                                                                                  |                                                                                                                                                                           |  |                                                                                                     |  |                                               |  |                                                                 |
|----------------------------------------------------------------------------------------------------------------------------------|--------------------------------------------------------------------------------------------------------------------------------------------------------------------------------|----------------------------------------------------------------------------------------------------------------------------------------------------------------------------------------------------------------------------------------------------------------------------------------------------------------------------------------------------------------------------------------------------------------------------------------------------------------------------------------------------------------------------------------------------------------------------------------------------------------------------------------------------------------------------------------------------------------------------------------------------------------------------------------------------------------------|----------------------------------------------------------------------------------------------------------------------------------|---------------------------------------------------------------------------------------------------------------------------------------------------------------------------|--|-----------------------------------------------------------------------------------------------------|--|-----------------------------------------------|--|-----------------------------------------------------------------|
| Time frame: Since the initial planning of the work                                                                               |                                                                                                                                                                                |                                                                                                                                                                                                                                                                                                                                                                                                                                                                                                                                                                                                                                                                                                                                                                                                                      |                                                                                                                                  |                                                                                                                                                                           |  |                                                                                                     |  |                                               |  |                                                                 |
| <b>1</b>                                                                                                                         | All support for the present manuscript (e.g., funding, provision of study materials, medical writing, article processing charges, etc.)<br><b>No time limit for this item.</b> | <input type="checkbox"/> <b>None</b><br><br><table border="1" style="width: 100%; border-collapse: collapse;"> <tr> <td style="width: 60%;">General funding started in 01.04.2020 and ended 31.05.2022<br/><b>German Federal Ministry of Health funded the clinical trial</b></td> <td style="width: 40%;">German Federal Ministry of Health funded the clinical trial. Expense reimbursement for donor treatment paid by the sponsor DRK Blutspendedienst Baden-Württemberg Hessen.</td> </tr> <tr> <td></td> <td>up to 630 € per enrolled donor including first plasmapheresis, 420 € per subsequent plasma donation</td> </tr> <tr> <td></td> <td>up to 310 € per donor in the follow up period</td> </tr> <tr> <td></td> <td>All paid to participating institution [not to the investigator]</td> </tr> </table> | General funding started in 01.04.2020 and ended 31.05.2022<br><b>German Federal Ministry of Health funded the clinical trial</b> | German Federal Ministry of Health funded the clinical trial. Expense reimbursement for donor treatment paid by the sponsor DRK Blutspendedienst Baden-Württemberg Hessen. |  | up to 630 € per enrolled donor including first plasmapheresis, 420 € per subsequent plasma donation |  | up to 310 € per donor in the follow up period |  | All paid to participating institution [not to the investigator] |
| General funding started in 01.04.2020 and ended 31.05.2022<br><b>German Federal Ministry of Health funded the clinical trial</b> | German Federal Ministry of Health funded the clinical trial. Expense reimbursement for donor treatment paid by the sponsor DRK Blutspendedienst Baden-Württemberg Hessen.      |                                                                                                                                                                                                                                                                                                                                                                                                                                                                                                                                                                                                                                                                                                                                                                                                                      |                                                                                                                                  |                                                                                                                                                                           |  |                                                                                                     |  |                                               |  |                                                                 |
|                                                                                                                                  | up to 630 € per enrolled donor including first plasmapheresis, 420 € per subsequent plasma donation                                                                            |                                                                                                                                                                                                                                                                                                                                                                                                                                                                                                                                                                                                                                                                                                                                                                                                                      |                                                                                                                                  |                                                                                                                                                                           |  |                                                                                                     |  |                                               |  |                                                                 |
|                                                                                                                                  | up to 310 € per donor in the follow up period                                                                                                                                  |                                                                                                                                                                                                                                                                                                                                                                                                                                                                                                                                                                                                                                                                                                                                                                                                                      |                                                                                                                                  |                                                                                                                                                                           |  |                                                                                                     |  |                                               |  |                                                                 |
|                                                                                                                                  | All paid to participating institution [not to the investigator]                                                                                                                |                                                                                                                                                                                                                                                                                                                                                                                                                                                                                                                                                                                                                                                                                                                                                                                                                      |                                                                                                                                  |                                                                                                                                                                           |  |                                                                                                     |  |                                               |  |                                                                 |
| Time frame: past 36 months                                                                                                       |                                                                                                                                                                                |                                                                                                                                                                                                                                                                                                                                                                                                                                                                                                                                                                                                                                                                                                                                                                                                                      |                                                                                                                                  |                                                                                                                                                                           |  |                                                                                                     |  |                                               |  |                                                                 |
| <b>2</b>                                                                                                                         | Grants or contracts from any entity (if not indicated in item #1 above).                                                                                                       | <input checked="" type="checkbox"/> <b>None</b><br><br><table border="1" style="width: 100%; border-collapse: collapse;"> <tr><td style="width: 60%; height: 20px;"></td><td style="width: 40%;"></td></tr> <tr><td style="height: 20px;"></td><td></td></tr> <tr><td style="height: 20px;"></td><td></td></tr> </table>                                                                                                                                                                                                                                                                                                                                                                                                                                                                                             |                                                                                                                                  |                                                                                                                                                                           |  |                                                                                                     |  |                                               |  |                                                                 |
|                                                                                                                                  |                                                                                                                                                                                |                                                                                                                                                                                                                                                                                                                                                                                                                                                                                                                                                                                                                                                                                                                                                                                                                      |                                                                                                                                  |                                                                                                                                                                           |  |                                                                                                     |  |                                               |  |                                                                 |
|                                                                                                                                  |                                                                                                                                                                                |                                                                                                                                                                                                                                                                                                                                                                                                                                                                                                                                                                                                                                                                                                                                                                                                                      |                                                                                                                                  |                                                                                                                                                                           |  |                                                                                                     |  |                                               |  |                                                                 |
|                                                                                                                                  |                                                                                                                                                                                |                                                                                                                                                                                                                                                                                                                                                                                                                                                                                                                                                                                                                                                                                                                                                                                                                      |                                                                                                                                  |                                                                                                                                                                           |  |                                                                                                     |  |                                               |  |                                                                 |

|   | Name all entities with whom you have this relationship or indicate none (add rows as needed)                 | Specifications/Comments (e.g., if payments were made to you or to your institution)                                                                                                               |  |  |  |  |  |  |
|---|--------------------------------------------------------------------------------------------------------------|---------------------------------------------------------------------------------------------------------------------------------------------------------------------------------------------------|--|--|--|--|--|--|
| 3 | Royalties or licenses                                                                                        | <input checked="" type="checkbox"/> <b>None</b><br><table border="1" data-bbox="437 385 1541 488"> <tr><td></td><td></td></tr> <tr><td></td><td></td></tr> <tr><td></td><td></td></tr> </table>   |  |  |  |  |  |  |
|   |                                                                                                              |                                                                                                                                                                                                   |  |  |  |  |  |  |
|   |                                                                                                              |                                                                                                                                                                                                   |  |  |  |  |  |  |
|   |                                                                                                              |                                                                                                                                                                                                   |  |  |  |  |  |  |
| 4 | Consulting fees                                                                                              | <input checked="" type="checkbox"/> <b>None</b><br><table border="1" data-bbox="437 631 1541 734"> <tr><td></td><td></td></tr> <tr><td></td><td></td></tr> <tr><td></td><td></td></tr> </table>   |  |  |  |  |  |  |
|   |                                                                                                              |                                                                                                                                                                                                   |  |  |  |  |  |  |
|   |                                                                                                              |                                                                                                                                                                                                   |  |  |  |  |  |  |
|   |                                                                                                              |                                                                                                                                                                                                   |  |  |  |  |  |  |
| 5 | Payment or honoraria for lectures, presentations, speakers bureaus, manuscript writing or educational events | <input checked="" type="checkbox"/> <b>None</b><br><table border="1" data-bbox="437 855 1541 958"> <tr><td></td><td></td></tr> <tr><td></td><td></td></tr> <tr><td></td><td></td></tr> </table>   |  |  |  |  |  |  |
|   |                                                                                                              |                                                                                                                                                                                                   |  |  |  |  |  |  |
|   |                                                                                                              |                                                                                                                                                                                                   |  |  |  |  |  |  |
|   |                                                                                                              |                                                                                                                                                                                                   |  |  |  |  |  |  |
| 6 | Payment for expert testimony                                                                                 | <input checked="" type="checkbox"/> <b>None</b><br><table border="1" data-bbox="437 1258 1541 1361"> <tr><td></td><td></td></tr> <tr><td></td><td></td></tr> <tr><td></td><td></td></tr> </table> |  |  |  |  |  |  |
|   |                                                                                                              |                                                                                                                                                                                                   |  |  |  |  |  |  |
|   |                                                                                                              |                                                                                                                                                                                                   |  |  |  |  |  |  |
|   |                                                                                                              |                                                                                                                                                                                                   |  |  |  |  |  |  |
| 7 | Support for attending meetings and/or travel                                                                 | <input checked="" type="checkbox"/> <b>None</b><br><table border="1" data-bbox="437 1482 1541 1585"> <tr><td></td><td></td></tr> <tr><td></td><td></td></tr> <tr><td></td><td></td></tr> </table> |  |  |  |  |  |  |
|   |                                                                                                              |                                                                                                                                                                                                   |  |  |  |  |  |  |
|   |                                                                                                              |                                                                                                                                                                                                   |  |  |  |  |  |  |
|   |                                                                                                              |                                                                                                                                                                                                   |  |  |  |  |  |  |
| 8 | Patents planned, issued or pending                                                                           | <input checked="" type="checkbox"/> <b>None</b><br><table border="1" data-bbox="437 1706 1541 1809"> <tr><td></td><td></td></tr> <tr><td></td><td></td></tr> <tr><td></td><td></td></tr> </table> |  |  |  |  |  |  |
|   |                                                                                                              |                                                                                                                                                                                                   |  |  |  |  |  |  |
|   |                                                                                                              |                                                                                                                                                                                                   |  |  |  |  |  |  |
|   |                                                                                                              |                                                                                                                                                                                                   |  |  |  |  |  |  |
| 9 | Participation on a Data Safety Monitoring Board or Advisory Board                                            | <input checked="" type="checkbox"/> <b>None</b><br><table border="1" data-bbox="437 1930 1541 2033"> <tr><td></td><td></td></tr> <tr><td></td><td></td></tr> <tr><td></td><td></td></tr> </table> |  |  |  |  |  |  |
|   |                                                                                                              |                                                                                                                                                                                                   |  |  |  |  |  |  |
|   |                                                                                                              |                                                                                                                                                                                                   |  |  |  |  |  |  |
|   |                                                                                                              |                                                                                                                                                                                                   |  |  |  |  |  |  |

|    |                                                                                                   | Name all entities with whom you have this relationship or indicate none (add rows as needed) | Specifications/Comments (e.g., if payments were made to you or to your institution) |
|----|---------------------------------------------------------------------------------------------------|----------------------------------------------------------------------------------------------|-------------------------------------------------------------------------------------|
| 10 | Leadership or fiduciary role in other board, society, committee or advocacy group, paid or unpaid | <input checked="" type="checkbox"/> None                                                     |                                                                                     |
|    |                                                                                                   |                                                                                              |                                                                                     |
|    |                                                                                                   |                                                                                              |                                                                                     |
|    |                                                                                                   |                                                                                              |                                                                                     |
| 11 | Stock or stock options                                                                            | <input checked="" type="checkbox"/> None                                                     |                                                                                     |
|    |                                                                                                   |                                                                                              |                                                                                     |
|    |                                                                                                   |                                                                                              |                                                                                     |
|    |                                                                                                   |                                                                                              |                                                                                     |
| 12 | Receipt of equipment, materials, drugs, medical writing, gifts or other services                  | <input checked="" type="checkbox"/> None                                                     |                                                                                     |
|    |                                                                                                   |                                                                                              |                                                                                     |
|    |                                                                                                   |                                                                                              |                                                                                     |
|    |                                                                                                   |                                                                                              |                                                                                     |
| 13 | Other financial or non-financial interests                                                        | <input checked="" type="checkbox"/> None                                                     |                                                                                     |
|    |                                                                                                   |                                                                                              |                                                                                     |
|    |                                                                                                   |                                                                                              |                                                                                     |
|    |                                                                                                   |                                                                                              |                                                                                     |

Please place an "X" next to the following statement to indicate your agreement:

I certify that I have answered every question and have not altered the wording of any of the questions on this form.



## ICMJE DISCLOSURE FORM

**Date:** 9/15/2022

**Your Name:** Prof. Dr. Michael Schmidt

**Manuscript Title:** One-year follow-up of the CAPSID randomized trial for high-dose convalescent plasma in severe COVID-19 patients

**Manuscript Number (if known):** 163657-JCI-CMED-RV-2

In the interest of transparency, we ask you to disclose all relationships/activities/interests listed below that are related to the content of your manuscript. "Related" means any relation with for-profit or not-for-profit third parties whose interests may be affected by the content of the manuscript. Disclosure represents a commitment to transparency and does not necessarily indicate a bias. If you are in doubt about whether to list a relationship/activity/interest, it is preferable that you do so.

The author's relationships/activities/interests should be defined broadly. For example, if your manuscript pertains to the epidemiology of hypertension, you should declare all relationships with manufacturers of antihypertensive medication, even if that medication is not mentioned in the manuscript.

In item #1 below, report all support for the work reported in this manuscript without time limit. For all other items, the time frame for disclosure is the past 36 months.

|                                                                                                                                  | Name all entities with whom you have this relationship or indicate none (add rows as needed)                                                                                   | Specifications/Comments (e.g., if payments were made to you or to your institution)                                                                                                                                                                                                                                                                                                                                                                                                                                               |                                                                                                                                  |                                                              |  |                                                                                  |  |  |
|----------------------------------------------------------------------------------------------------------------------------------|--------------------------------------------------------------------------------------------------------------------------------------------------------------------------------|-----------------------------------------------------------------------------------------------------------------------------------------------------------------------------------------------------------------------------------------------------------------------------------------------------------------------------------------------------------------------------------------------------------------------------------------------------------------------------------------------------------------------------------|----------------------------------------------------------------------------------------------------------------------------------|--------------------------------------------------------------|--|----------------------------------------------------------------------------------|--|--|
| Time frame: Since the initial planning of the work                                                                               |                                                                                                                                                                                |                                                                                                                                                                                                                                                                                                                                                                                                                                                                                                                                   |                                                                                                                                  |                                                              |  |                                                                                  |  |  |
| <b>1</b>                                                                                                                         | All support for the present manuscript (e.g., funding, provision of study materials, medical writing, article processing charges, etc.)<br><b>No time limit for this item.</b> | <input type="checkbox"/> None<br><br><table border="1" style="width: 100%; border-collapse: collapse;"> <tr> <td style="width: 60%;">General funding started in 01.04.2020 and ended 31.05.2022<br/><b>German Federal Ministry of Health funded the clinical trial</b></td> <td style="width: 40%;">German Federal Ministry of Health funded the clinical trial.</td> </tr> <tr> <td></td> <td style="text-align: center;">3.555.082 €<br/><br/>(paid to participating institution [not to the investigator])</td> </tr> </table> | General funding started in 01.04.2020 and ended 31.05.2022<br><b>German Federal Ministry of Health funded the clinical trial</b> | German Federal Ministry of Health funded the clinical trial. |  | 3.555.082 €<br><br>(paid to participating institution [not to the investigator]) |  |  |
| General funding started in 01.04.2020 and ended 31.05.2022<br><b>German Federal Ministry of Health funded the clinical trial</b> | German Federal Ministry of Health funded the clinical trial.                                                                                                                   |                                                                                                                                                                                                                                                                                                                                                                                                                                                                                                                                   |                                                                                                                                  |                                                              |  |                                                                                  |  |  |
|                                                                                                                                  | 3.555.082 €<br><br>(paid to participating institution [not to the investigator])                                                                                               |                                                                                                                                                                                                                                                                                                                                                                                                                                                                                                                                   |                                                                                                                                  |                                                              |  |                                                                                  |  |  |
| Time frame: past 36 months                                                                                                       |                                                                                                                                                                                |                                                                                                                                                                                                                                                                                                                                                                                                                                                                                                                                   |                                                                                                                                  |                                                              |  |                                                                                  |  |  |
| <b>2</b>                                                                                                                         | Grants or contracts from any entity (if not indicated in item #1 above).                                                                                                       | <input checked="" type="checkbox"/> None<br><br><table border="1" style="width: 100%; border-collapse: collapse;"> <tr><td style="width: 60%; height: 20px;"></td><td style="width: 40%;"></td></tr> <tr><td style="height: 20px;"></td><td></td></tr> <tr><td style="height: 20px;"></td><td></td></tr> </table>                                                                                                                                                                                                                 |                                                                                                                                  |                                                              |  |                                                                                  |  |  |
|                                                                                                                                  |                                                                                                                                                                                |                                                                                                                                                                                                                                                                                                                                                                                                                                                                                                                                   |                                                                                                                                  |                                                              |  |                                                                                  |  |  |
|                                                                                                                                  |                                                                                                                                                                                |                                                                                                                                                                                                                                                                                                                                                                                                                                                                                                                                   |                                                                                                                                  |                                                              |  |                                                                                  |  |  |
|                                                                                                                                  |                                                                                                                                                                                |                                                                                                                                                                                                                                                                                                                                                                                                                                                                                                                                   |                                                                                                                                  |                                                              |  |                                                                                  |  |  |

|                                   | Name all entities with whom you have this relationship or indicate none (add rows as needed)                 | Specifications/Comments (e.g., if payments were made to you or to your institution)                                                                                                                                     |                                   |  |  |  |  |  |
|-----------------------------------|--------------------------------------------------------------------------------------------------------------|-------------------------------------------------------------------------------------------------------------------------------------------------------------------------------------------------------------------------|-----------------------------------|--|--|--|--|--|
| 3                                 | Royalties or licenses                                                                                        | <input checked="" type="checkbox"/> <b>None</b><br><table border="1" data-bbox="437 383 1538 488"> <tr><td></td><td></td></tr> <tr><td></td><td></td></tr> <tr><td></td><td></td></tr> </table>                         |                                   |  |  |  |  |  |
|                                   |                                                                                                              |                                                                                                                                                                                                                         |                                   |  |  |  |  |  |
|                                   |                                                                                                              |                                                                                                                                                                                                                         |                                   |  |  |  |  |  |
|                                   |                                                                                                              |                                                                                                                                                                                                                         |                                   |  |  |  |  |  |
| 4                                 | Consulting fees                                                                                              | <input checked="" type="checkbox"/> <b>None</b><br><table border="1" data-bbox="437 629 1538 734"> <tr><td></td><td></td></tr> <tr><td></td><td></td></tr> <tr><td></td><td></td></tr> </table>                         |                                   |  |  |  |  |  |
|                                   |                                                                                                              |                                                                                                                                                                                                                         |                                   |  |  |  |  |  |
|                                   |                                                                                                              |                                                                                                                                                                                                                         |                                   |  |  |  |  |  |
|                                   |                                                                                                              |                                                                                                                                                                                                                         |                                   |  |  |  |  |  |
| 5                                 | Payment or honoraria for lectures, presentations, speakers bureaus, manuscript writing or educational events | <input checked="" type="checkbox"/> <b>None</b><br><table border="1" data-bbox="437 853 1538 958"> <tr><td></td><td></td></tr> <tr><td></td><td></td></tr> <tr><td></td><td></td></tr> </table>                         |                                   |  |  |  |  |  |
|                                   |                                                                                                              |                                                                                                                                                                                                                         |                                   |  |  |  |  |  |
|                                   |                                                                                                              |                                                                                                                                                                                                                         |                                   |  |  |  |  |  |
|                                   |                                                                                                              |                                                                                                                                                                                                                         |                                   |  |  |  |  |  |
| 6                                 | Payment for expert testimony                                                                                 | <input checked="" type="checkbox"/> <b>None</b><br><table border="1" data-bbox="437 1200 1538 1305"> <tr><td></td><td></td></tr> <tr><td></td><td></td></tr> <tr><td></td><td></td></tr> </table>                       |                                   |  |  |  |  |  |
|                                   |                                                                                                              |                                                                                                                                                                                                                         |                                   |  |  |  |  |  |
|                                   |                                                                                                              |                                                                                                                                                                                                                         |                                   |  |  |  |  |  |
|                                   |                                                                                                              |                                                                                                                                                                                                                         |                                   |  |  |  |  |  |
| 7                                 | Support for attending meetings and/or travel                                                                 | <input checked="" type="checkbox"/> <b>None</b><br><table border="1" data-bbox="437 1413 1538 1518"> <tr><td></td><td></td></tr> <tr><td></td><td></td></tr> <tr><td></td><td></td></tr> </table>                       |                                   |  |  |  |  |  |
|                                   |                                                                                                              |                                                                                                                                                                                                                         |                                   |  |  |  |  |  |
|                                   |                                                                                                              |                                                                                                                                                                                                                         |                                   |  |  |  |  |  |
|                                   |                                                                                                              |                                                                                                                                                                                                                         |                                   |  |  |  |  |  |
| 8                                 | Patents planned, issued or pending                                                                           | <input type="checkbox"/> <b>None</b><br><table border="1" data-bbox="437 1637 1538 1742"> <tr><td>SARS mini pool NAT testing method</td><td></td></tr> <tr><td></td><td></td></tr> <tr><td></td><td></td></tr> </table> | SARS mini pool NAT testing method |  |  |  |  |  |
| SARS mini pool NAT testing method |                                                                                                              |                                                                                                                                                                                                                         |                                   |  |  |  |  |  |
|                                   |                                                                                                              |                                                                                                                                                                                                                         |                                   |  |  |  |  |  |
|                                   |                                                                                                              |                                                                                                                                                                                                                         |                                   |  |  |  |  |  |
| 9                                 | Participation on a Data Safety Monitoring Board or Advisory Board                                            | <input checked="" type="checkbox"/> <b>None</b><br><table border="1" data-bbox="437 1861 1538 1966"> <tr><td></td><td></td></tr> <tr><td></td><td></td></tr> <tr><td></td><td></td></tr> </table>                       |                                   |  |  |  |  |  |
|                                   |                                                                                                              |                                                                                                                                                                                                                         |                                   |  |  |  |  |  |
|                                   |                                                                                                              |                                                                                                                                                                                                                         |                                   |  |  |  |  |  |
|                                   |                                                                                                              |                                                                                                                                                                                                                         |                                   |  |  |  |  |  |

|        |                                                                                                   | Name all entities with whom you have this relationship or indicate none (add rows as needed) | Specifications/Comments (e.g., if payments were made to you or to your institution) |
|--------|---------------------------------------------------------------------------------------------------|----------------------------------------------------------------------------------------------|-------------------------------------------------------------------------------------|
| 1<br>0 | Leadership or fiduciary role in other board, society, committee or advocacy group, paid or unpaid | <input checked="" type="checkbox"/> None                                                     |                                                                                     |
|        |                                                                                                   |                                                                                              |                                                                                     |
|        |                                                                                                   |                                                                                              |                                                                                     |
| 1<br>1 | Stock or stock options                                                                            | <input checked="" type="checkbox"/> None                                                     |                                                                                     |
|        |                                                                                                   |                                                                                              |                                                                                     |
|        |                                                                                                   |                                                                                              |                                                                                     |
| 1<br>2 | Receipt of equipment, materials, drugs, medical writing, gifts or other services                  | <input checked="" type="checkbox"/> None                                                     |                                                                                     |
|        |                                                                                                   |                                                                                              |                                                                                     |
|        |                                                                                                   |                                                                                              |                                                                                     |
| 1<br>3 | Other financial or non-financial interests                                                        | <input checked="" type="checkbox"/> None                                                     |                                                                                     |
|        |                                                                                                   |                                                                                              |                                                                                     |
|        |                                                                                                   |                                                                                              |                                                                                     |

Please place an "X" next to the following statement to indicate your agreement:

I certify that I have answered every question and have not altered the wording of any of the questions on this form.

## ICMJE DISCLOSURE FORM

**Date:** 9/15/2022

**Your Name:** Dr. Markus Rojewski

**Manuscript Title:** One-year follow-up of the CAPSID randomized trial for high-dose convalescent plasma in severe COVID-19 patients

**Manuscript Number (if known):** 163657-JCI-CMED-RV-2

In the interest of transparency, we ask you to disclose all relationships/activities/interests listed below that are related to the content of your manuscript. "Related" means any relation with for-profit or not-for-profit third parties whose interests may be affected by the content of the manuscript. Disclosure represents a commitment to transparency and does not necessarily indicate a bias. If you are in doubt about whether to list a relationship/activity/interest, it is preferable that you do so.

The author's relationships/activities/interests should be defined broadly. For example, if your manuscript pertains to the epidemiology of hypertension, you should declare all relationships with manufacturers of antihypertensive medication, even if that medication is not mentioned in the manuscript.

In item #1 below, report all support for the work reported in this manuscript without time limit. For all other items, the time frame for disclosure is the past 36 months.

|                                                    | Name all entities with whom you have this relationship or indicate none (add rows as needed)                                                                                   | Specifications/Comments (e.g., if payments were made to you or to your institution)                                                                                                                                                                                                                                                                                                             |  |  |  |  |  |  |
|----------------------------------------------------|--------------------------------------------------------------------------------------------------------------------------------------------------------------------------------|-------------------------------------------------------------------------------------------------------------------------------------------------------------------------------------------------------------------------------------------------------------------------------------------------------------------------------------------------------------------------------------------------|--|--|--|--|--|--|
| Time frame: Since the initial planning of the work |                                                                                                                                                                                |                                                                                                                                                                                                                                                                                                                                                                                                 |  |  |  |  |  |  |
| <b>1</b>                                           | All support for the present manuscript (e.g., funding, provision of study materials, medical writing, article processing charges, etc.)<br><b>No time limit for this item.</b> | <input checked="" type="checkbox"/> <b>None</b>                                                                                                                                                                                                                                                                                                                                                 |  |  |  |  |  |  |
| Time frame: past 36 months                         |                                                                                                                                                                                |                                                                                                                                                                                                                                                                                                                                                                                                 |  |  |  |  |  |  |
| <b>2</b>                                           | Grants or contracts from any entity (if not indicated in item #1 above).                                                                                                       | <input checked="" type="checkbox"/> <b>None</b><br><table border="1" style="width: 100%; border-collapse: collapse; margin-top: 5px;"> <tr><td style="width: 60%; height: 15px;"></td><td style="width: 40%; height: 15px;"></td></tr> <tr><td style="height: 15px;"></td><td style="height: 15px;"></td></tr> <tr><td style="height: 15px;"></td><td style="height: 15px;"></td></tr> </table> |  |  |  |  |  |  |
|                                                    |                                                                                                                                                                                |                                                                                                                                                                                                                                                                                                                                                                                                 |  |  |  |  |  |  |
|                                                    |                                                                                                                                                                                |                                                                                                                                                                                                                                                                                                                                                                                                 |  |  |  |  |  |  |
|                                                    |                                                                                                                                                                                |                                                                                                                                                                                                                                                                                                                                                                                                 |  |  |  |  |  |  |

|          | Name all entities with whom you have this relationship or indicate none (add rows as needed)                 | Specifications/Comments (e.g., if payments were made to you or to your institution)                                                                                                               |  |  |  |  |  |  |
|----------|--------------------------------------------------------------------------------------------------------------|---------------------------------------------------------------------------------------------------------------------------------------------------------------------------------------------------|--|--|--|--|--|--|
| <b>3</b> | Royalties or licenses                                                                                        | <input checked="" type="checkbox"/> <b>None</b><br><table border="1" data-bbox="437 383 1011 488"> <tr><td></td><td></td></tr> <tr><td></td><td></td></tr> <tr><td></td><td></td></tr> </table>   |  |  |  |  |  |  |
|          |                                                                                                              |                                                                                                                                                                                                   |  |  |  |  |  |  |
|          |                                                                                                              |                                                                                                                                                                                                   |  |  |  |  |  |  |
|          |                                                                                                              |                                                                                                                                                                                                   |  |  |  |  |  |  |
| <b>4</b> | Consulting fees                                                                                              | <input checked="" type="checkbox"/> <b>None</b><br><table border="1" data-bbox="437 629 1011 734"> <tr><td></td><td></td></tr> <tr><td></td><td></td></tr> <tr><td></td><td></td></tr> </table>   |  |  |  |  |  |  |
|          |                                                                                                              |                                                                                                                                                                                                   |  |  |  |  |  |  |
|          |                                                                                                              |                                                                                                                                                                                                   |  |  |  |  |  |  |
|          |                                                                                                              |                                                                                                                                                                                                   |  |  |  |  |  |  |
| <b>5</b> | Payment or honoraria for lectures, presentations, speakers bureaus, manuscript writing or educational events | <input checked="" type="checkbox"/> <b>None</b><br><table border="1" data-bbox="437 853 1011 958"> <tr><td></td><td></td></tr> <tr><td></td><td></td></tr> <tr><td></td><td></td></tr> </table>   |  |  |  |  |  |  |
|          |                                                                                                              |                                                                                                                                                                                                   |  |  |  |  |  |  |
|          |                                                                                                              |                                                                                                                                                                                                   |  |  |  |  |  |  |
|          |                                                                                                              |                                                                                                                                                                                                   |  |  |  |  |  |  |
| <b>6</b> | Payment for expert testimony                                                                                 | <input checked="" type="checkbox"/> <b>None</b><br><table border="1" data-bbox="437 1200 1011 1305"> <tr><td></td><td></td></tr> <tr><td></td><td></td></tr> <tr><td></td><td></td></tr> </table> |  |  |  |  |  |  |
|          |                                                                                                              |                                                                                                                                                                                                   |  |  |  |  |  |  |
|          |                                                                                                              |                                                                                                                                                                                                   |  |  |  |  |  |  |
|          |                                                                                                              |                                                                                                                                                                                                   |  |  |  |  |  |  |
| <b>7</b> | Support for attending meetings and/or travel                                                                 | <input checked="" type="checkbox"/> <b>None</b><br><table border="1" data-bbox="437 1413 1011 1518"> <tr><td></td><td></td></tr> <tr><td></td><td></td></tr> <tr><td></td><td></td></tr> </table> |  |  |  |  |  |  |
|          |                                                                                                              |                                                                                                                                                                                                   |  |  |  |  |  |  |
|          |                                                                                                              |                                                                                                                                                                                                   |  |  |  |  |  |  |
|          |                                                                                                              |                                                                                                                                                                                                   |  |  |  |  |  |  |
| <b>8</b> | Patents planned, issued or pending                                                                           | <input checked="" type="checkbox"/> <b>None</b><br><table border="1" data-bbox="437 1637 1011 1742"> <tr><td></td><td></td></tr> <tr><td></td><td></td></tr> <tr><td></td><td></td></tr> </table> |  |  |  |  |  |  |
|          |                                                                                                              |                                                                                                                                                                                                   |  |  |  |  |  |  |
|          |                                                                                                              |                                                                                                                                                                                                   |  |  |  |  |  |  |
|          |                                                                                                              |                                                                                                                                                                                                   |  |  |  |  |  |  |
| <b>9</b> | Participation on a Data Safety Monitoring Board or Advisory Board                                            | <input checked="" type="checkbox"/> <b>None</b><br><table border="1" data-bbox="437 1850 1011 1955"> <tr><td></td><td></td></tr> <tr><td></td><td></td></tr> <tr><td></td><td></td></tr> </table> |  |  |  |  |  |  |
|          |                                                                                                              |                                                                                                                                                                                                   |  |  |  |  |  |  |
|          |                                                                                                              |                                                                                                                                                                                                   |  |  |  |  |  |  |
|          |                                                                                                              |                                                                                                                                                                                                   |  |  |  |  |  |  |

|           | Name all entities with whom you have this relationship or indicate none (add rows as needed)      | Specifications/Comments (e.g., if payments were made to you or to your institution)                                                                                                                     |  |  |  |  |  |  |
|-----------|---------------------------------------------------------------------------------------------------|---------------------------------------------------------------------------------------------------------------------------------------------------------------------------------------------------------|--|--|--|--|--|--|
| <b>10</b> | Leadership or fiduciary role in other board, society, committee or advocacy group, paid or unpaid | <input checked="" type="checkbox"/> <b>None</b><br><table border="1" data-bbox="435 383 1520 488"> <tr><td> </td><td> </td></tr> <tr><td> </td><td> </td></tr> <tr><td> </td><td> </td></tr> </table>   |  |  |  |  |  |  |
|           |                                                                                                   |                                                                                                                                                                                                         |  |  |  |  |  |  |
|           |                                                                                                   |                                                                                                                                                                                                         |  |  |  |  |  |  |
|           |                                                                                                   |                                                                                                                                                                                                         |  |  |  |  |  |  |
| <b>11</b> | Stock or stock options                                                                            | <input checked="" type="checkbox"/> <b>None</b><br><table border="1" data-bbox="435 696 1520 801"> <tr><td> </td><td> </td></tr> <tr><td> </td><td> </td></tr> <tr><td> </td><td> </td></tr> </table>   |  |  |  |  |  |  |
|           |                                                                                                   |                                                                                                                                                                                                         |  |  |  |  |  |  |
|           |                                                                                                   |                                                                                                                                                                                                         |  |  |  |  |  |  |
|           |                                                                                                   |                                                                                                                                                                                                         |  |  |  |  |  |  |
| <b>12</b> | Receipt of equipment, materials, drugs, medical writing, gifts or other services                  | <input checked="" type="checkbox"/> <b>None</b><br><table border="1" data-bbox="435 916 1520 1021"> <tr><td> </td><td> </td></tr> <tr><td> </td><td> </td></tr> <tr><td> </td><td> </td></tr> </table>  |  |  |  |  |  |  |
|           |                                                                                                   |                                                                                                                                                                                                         |  |  |  |  |  |  |
|           |                                                                                                   |                                                                                                                                                                                                         |  |  |  |  |  |  |
|           |                                                                                                   |                                                                                                                                                                                                         |  |  |  |  |  |  |
| <b>13</b> | Other financial or non-financial interests                                                        | <input checked="" type="checkbox"/> <b>None</b><br><table border="1" data-bbox="435 1198 1520 1303"> <tr><td> </td><td> </td></tr> <tr><td> </td><td> </td></tr> <tr><td> </td><td> </td></tr> </table> |  |  |  |  |  |  |
|           |                                                                                                   |                                                                                                                                                                                                         |  |  |  |  |  |  |
|           |                                                                                                   |                                                                                                                                                                                                         |  |  |  |  |  |  |
|           |                                                                                                   |                                                                                                                                                                                                         |  |  |  |  |  |  |

**Please place an "X" next to the following statement to indicate your agreement:**

I certify that I have answered every question and have not altered the wording of any of the questions on this form.

## ICMJE DISCLOSURE FORM

**Date:** 9/15/2022

**Your Name:** Dr. Alexandra Ulrich

**Manuscript Title:** One-year follow-up of the CAPSID randomized trial for high-dose convalescent plasma in severe COVID-19 patients

**Manuscript Number (if known):** 163657-JCI-CMED-RV-2

In the interest of transparency, we ask you to disclose all relationships/activities/interests listed below that are related to the content of your manuscript. "Related" means any relation with for-profit or not-for-profit third parties whose interests may be affected by the content of the manuscript. Disclosure represents a commitment to transparency and does not necessarily indicate a bias. If you are in doubt about whether to list a relationship/activity/interest, it is preferable that you do so.

The author's relationships/activities/interests should be defined broadly. For example, if your manuscript pertains to the epidemiology of hypertension, you should declare all relationships with manufacturers of antihypertensive medication, even if that medication is not mentioned in the manuscript.

In item #1 below, report all support for the work reported in this manuscript without time limit. For all other items, the time frame for disclosure is the past 36 months.

|                                                                                                                                  | Name all entities with whom you have this relationship or indicate none (add rows as needed)                                                                                   | Specifications/Comments (e.g., if payments were made to you or to your institution)                                                                                                                                                                                                                                                                                                                                                                                                                                                                                                                                                                                                                                                                                                        |                                                                                                                                  |                                                                                                                                                                            |  |                                                                                                     |  |                                               |  |                                                                 |
|----------------------------------------------------------------------------------------------------------------------------------|--------------------------------------------------------------------------------------------------------------------------------------------------------------------------------|--------------------------------------------------------------------------------------------------------------------------------------------------------------------------------------------------------------------------------------------------------------------------------------------------------------------------------------------------------------------------------------------------------------------------------------------------------------------------------------------------------------------------------------------------------------------------------------------------------------------------------------------------------------------------------------------------------------------------------------------------------------------------------------------|----------------------------------------------------------------------------------------------------------------------------------|----------------------------------------------------------------------------------------------------------------------------------------------------------------------------|--|-----------------------------------------------------------------------------------------------------|--|-----------------------------------------------|--|-----------------------------------------------------------------|
| Time frame: Since the initial planning of the work                                                                               |                                                                                                                                                                                |                                                                                                                                                                                                                                                                                                                                                                                                                                                                                                                                                                                                                                                                                                                                                                                            |                                                                                                                                  |                                                                                                                                                                            |  |                                                                                                     |  |                                               |  |                                                                 |
| <b>1</b>                                                                                                                         | All support for the present manuscript (e.g., funding, provision of study materials, medical writing, article processing charges, etc.)<br><b>No time limit for this item.</b> | <input type="checkbox"/> None<br><br><table border="1" style="width: 100%; border-collapse: collapse;"> <tr> <td style="width: 60%;">General funding started in 01.04.2020 and ended 31.05.2022<br/><b>German Federal Ministry of Health funded the clinical trial</b></td> <td>German Federal Ministry of Health funded the clinical trial. Expense reimbursement for patient treatment paid by the sponsor DRK Blutspendedienst Baden-Württemberg Hessen</td> </tr> <tr> <td></td> <td>up to 630 € per enrolled donor including first plasmapheresis, 420 € per subsequent plasma donation</td> </tr> <tr> <td></td> <td>up to 310 € per donor in the follow up period</td> </tr> <tr> <td></td> <td>All paid to participating institution [not to the investigator]</td> </tr> </table> | General funding started in 01.04.2020 and ended 31.05.2022<br><b>German Federal Ministry of Health funded the clinical trial</b> | German Federal Ministry of Health funded the clinical trial. Expense reimbursement for patient treatment paid by the sponsor DRK Blutspendedienst Baden-Württemberg Hessen |  | up to 630 € per enrolled donor including first plasmapheresis, 420 € per subsequent plasma donation |  | up to 310 € per donor in the follow up period |  | All paid to participating institution [not to the investigator] |
| General funding started in 01.04.2020 and ended 31.05.2022<br><b>German Federal Ministry of Health funded the clinical trial</b> | German Federal Ministry of Health funded the clinical trial. Expense reimbursement for patient treatment paid by the sponsor DRK Blutspendedienst Baden-Württemberg Hessen     |                                                                                                                                                                                                                                                                                                                                                                                                                                                                                                                                                                                                                                                                                                                                                                                            |                                                                                                                                  |                                                                                                                                                                            |  |                                                                                                     |  |                                               |  |                                                                 |
|                                                                                                                                  | up to 630 € per enrolled donor including first plasmapheresis, 420 € per subsequent plasma donation                                                                            |                                                                                                                                                                                                                                                                                                                                                                                                                                                                                                                                                                                                                                                                                                                                                                                            |                                                                                                                                  |                                                                                                                                                                            |  |                                                                                                     |  |                                               |  |                                                                 |
|                                                                                                                                  | up to 310 € per donor in the follow up period                                                                                                                                  |                                                                                                                                                                                                                                                                                                                                                                                                                                                                                                                                                                                                                                                                                                                                                                                            |                                                                                                                                  |                                                                                                                                                                            |  |                                                                                                     |  |                                               |  |                                                                 |
|                                                                                                                                  | All paid to participating institution [not to the investigator]                                                                                                                |                                                                                                                                                                                                                                                                                                                                                                                                                                                                                                                                                                                                                                                                                                                                                                                            |                                                                                                                                  |                                                                                                                                                                            |  |                                                                                                     |  |                                               |  |                                                                 |
| Time frame: past 36 months                                                                                                       |                                                                                                                                                                                |                                                                                                                                                                                                                                                                                                                                                                                                                                                                                                                                                                                                                                                                                                                                                                                            |                                                                                                                                  |                                                                                                                                                                            |  |                                                                                                     |  |                                               |  |                                                                 |
| <b>2</b>                                                                                                                         | Grants or contracts from any entity (if not indicated in item #1 above).                                                                                                       | <input checked="" type="checkbox"/> None<br><br><table border="1" style="width: 100%; border-collapse: collapse;"> <tr><td style="width: 60%; height: 20px;"></td><td></td></tr> <tr><td style="height: 20px;"></td><td></td></tr> <tr><td style="height: 20px;"></td><td></td></tr> </table>                                                                                                                                                                                                                                                                                                                                                                                                                                                                                              |                                                                                                                                  |                                                                                                                                                                            |  |                                                                                                     |  |                                               |  |                                                                 |
|                                                                                                                                  |                                                                                                                                                                                |                                                                                                                                                                                                                                                                                                                                                                                                                                                                                                                                                                                                                                                                                                                                                                                            |                                                                                                                                  |                                                                                                                                                                            |  |                                                                                                     |  |                                               |  |                                                                 |
|                                                                                                                                  |                                                                                                                                                                                |                                                                                                                                                                                                                                                                                                                                                                                                                                                                                                                                                                                                                                                                                                                                                                                            |                                                                                                                                  |                                                                                                                                                                            |  |                                                                                                     |  |                                               |  |                                                                 |
|                                                                                                                                  |                                                                                                                                                                                |                                                                                                                                                                                                                                                                                                                                                                                                                                                                                                                                                                                                                                                                                                                                                                                            |                                                                                                                                  |                                                                                                                                                                            |  |                                                                                                     |  |                                               |  |                                                                 |

|   | Name all entities with whom you have this relationship or indicate none (add rows as needed)                 | Specifications/Comments (e.g., if payments were made to you or to your institution)                                                                                                               |  |  |  |  |  |  |
|---|--------------------------------------------------------------------------------------------------------------|---------------------------------------------------------------------------------------------------------------------------------------------------------------------------------------------------|--|--|--|--|--|--|
| 3 | Royalties or licenses                                                                                        | <input checked="" type="checkbox"/> <b>None</b><br><table border="1" data-bbox="437 383 1538 488"> <tr><td></td><td></td></tr> <tr><td></td><td></td></tr> <tr><td></td><td></td></tr> </table>   |  |  |  |  |  |  |
|   |                                                                                                              |                                                                                                                                                                                                   |  |  |  |  |  |  |
|   |                                                                                                              |                                                                                                                                                                                                   |  |  |  |  |  |  |
|   |                                                                                                              |                                                                                                                                                                                                   |  |  |  |  |  |  |
| 4 | Consulting fees                                                                                              | <input checked="" type="checkbox"/> <b>None</b><br><table border="1" data-bbox="437 629 1538 734"> <tr><td></td><td></td></tr> <tr><td></td><td></td></tr> <tr><td></td><td></td></tr> </table>   |  |  |  |  |  |  |
|   |                                                                                                              |                                                                                                                                                                                                   |  |  |  |  |  |  |
|   |                                                                                                              |                                                                                                                                                                                                   |  |  |  |  |  |  |
|   |                                                                                                              |                                                                                                                                                                                                   |  |  |  |  |  |  |
| 5 | Payment or honoraria for lectures, presentations, speakers bureaus, manuscript writing or educational events | <input checked="" type="checkbox"/> <b>None</b><br><table border="1" data-bbox="437 853 1538 958"> <tr><td></td><td></td></tr> <tr><td></td><td></td></tr> <tr><td></td><td></td></tr> </table>   |  |  |  |  |  |  |
|   |                                                                                                              |                                                                                                                                                                                                   |  |  |  |  |  |  |
|   |                                                                                                              |                                                                                                                                                                                                   |  |  |  |  |  |  |
|   |                                                                                                              |                                                                                                                                                                                                   |  |  |  |  |  |  |
| 6 | Payment for expert testimony                                                                                 | <input checked="" type="checkbox"/> <b>None</b><br><table border="1" data-bbox="437 1200 1538 1305"> <tr><td></td><td></td></tr> <tr><td></td><td></td></tr> <tr><td></td><td></td></tr> </table> |  |  |  |  |  |  |
|   |                                                                                                              |                                                                                                                                                                                                   |  |  |  |  |  |  |
|   |                                                                                                              |                                                                                                                                                                                                   |  |  |  |  |  |  |
|   |                                                                                                              |                                                                                                                                                                                                   |  |  |  |  |  |  |
| 7 | Support for attending meetings and/or travel                                                                 | <input checked="" type="checkbox"/> <b>None</b><br><table border="1" data-bbox="437 1413 1538 1518"> <tr><td></td><td></td></tr> <tr><td></td><td></td></tr> <tr><td></td><td></td></tr> </table> |  |  |  |  |  |  |
|   |                                                                                                              |                                                                                                                                                                                                   |  |  |  |  |  |  |
|   |                                                                                                              |                                                                                                                                                                                                   |  |  |  |  |  |  |
|   |                                                                                                              |                                                                                                                                                                                                   |  |  |  |  |  |  |
| 8 | Patents planned, issued or pending                                                                           | <input checked="" type="checkbox"/> <b>None</b><br><table border="1" data-bbox="437 1637 1538 1742"> <tr><td></td><td></td></tr> <tr><td></td><td></td></tr> <tr><td></td><td></td></tr> </table> |  |  |  |  |  |  |
|   |                                                                                                              |                                                                                                                                                                                                   |  |  |  |  |  |  |
|   |                                                                                                              |                                                                                                                                                                                                   |  |  |  |  |  |  |
|   |                                                                                                              |                                                                                                                                                                                                   |  |  |  |  |  |  |
| 9 | Participation on a Data Safety Monitoring Board or Advisory Board                                            | <input checked="" type="checkbox"/> <b>None</b><br><table border="1" data-bbox="437 1861 1538 1966"> <tr><td></td><td></td></tr> <tr><td></td><td></td></tr> <tr><td></td><td></td></tr> </table> |  |  |  |  |  |  |
|   |                                                                                                              |                                                                                                                                                                                                   |  |  |  |  |  |  |
|   |                                                                                                              |                                                                                                                                                                                                   |  |  |  |  |  |  |
|   |                                                                                                              |                                                                                                                                                                                                   |  |  |  |  |  |  |



|        |                                                                                                   | Name all entities with whom you have this relationship or indicate none (add rows as needed) | Specifications/Comments (e.g., if payments were made to you or to your institution) |
|--------|---------------------------------------------------------------------------------------------------|----------------------------------------------------------------------------------------------|-------------------------------------------------------------------------------------|
| 1<br>0 | Leadership or fiduciary role in other board, society, committee or advocacy group, paid or unpaid | <input checked="" type="checkbox"/> None                                                     |                                                                                     |
|        |                                                                                                   |                                                                                              |                                                                                     |
|        |                                                                                                   |                                                                                              |                                                                                     |
| 1<br>1 | Stock or stock options                                                                            | <input checked="" type="checkbox"/> None                                                     |                                                                                     |
|        |                                                                                                   |                                                                                              |                                                                                     |
|        |                                                                                                   |                                                                                              |                                                                                     |
| 1<br>2 | Receipt of equipment, materials, drugs, medical writing, gifts or other services                  | <input checked="" type="checkbox"/> None                                                     |                                                                                     |
|        |                                                                                                   |                                                                                              |                                                                                     |
|        |                                                                                                   |                                                                                              |                                                                                     |
| 1<br>3 | Other financial or non-financial interests                                                        | <input checked="" type="checkbox"/> None                                                     |                                                                                     |
|        |                                                                                                   |                                                                                              |                                                                                     |
|        |                                                                                                   |                                                                                              |                                                                                     |

Please place an "X" next to the following statement to indicate your agreement:

I certify that I have answered every question and have not altered the wording of any of the questions on this form.

## ICMJE DISCLOSURE FORM

**Date:** 9/15/2022

**Your Name:** Prof. Dr. Patrick Wuchter

**Manuscript Title:** One-year follow-up of the CAPSID randomized trial for high-dose convalescent plasma in severe COVID-19 patients

**Manuscript Number (if known):** 163657-JCI-CMED-RV-2

In the interest of transparency, we ask you to disclose all relationships/activities/interests listed below that are related to the content of your manuscript. "Related" means any relation with for-profit or not-for-profit third parties whose interests may be affected by the content of the manuscript. Disclosure represents a commitment to transparency and does not necessarily indicate a bias. If you are in doubt about whether to list a relationship/activity/interest, it is preferable that you do so.

The author's relationships/activities/interests should be defined broadly. For example, if your manuscript pertains to the epidemiology of hypertension, you should declare all relationships with manufacturers of antihypertensive medication, even if that medication is not mentioned in the manuscript.

In item #1 below, report all support for the work reported in this manuscript without time limit. For all other items, the time frame for disclosure is the past 36 months.

|                                                                                                                                  | Name all entities with whom you have this relationship or indicate none (add rows as needed)                                                                                   | Specifications/Comments (e.g., if payments were made to you or to your institution)                                                                                                                                                                                                                                                                                                                                                                                                                                                                                                                                                                                                                                                                                                                                   |                                                                                                                                  |                                                                                                                                                                            |  |                                                                                                     |  |                                               |  |                                                                 |
|----------------------------------------------------------------------------------------------------------------------------------|--------------------------------------------------------------------------------------------------------------------------------------------------------------------------------|-----------------------------------------------------------------------------------------------------------------------------------------------------------------------------------------------------------------------------------------------------------------------------------------------------------------------------------------------------------------------------------------------------------------------------------------------------------------------------------------------------------------------------------------------------------------------------------------------------------------------------------------------------------------------------------------------------------------------------------------------------------------------------------------------------------------------|----------------------------------------------------------------------------------------------------------------------------------|----------------------------------------------------------------------------------------------------------------------------------------------------------------------------|--|-----------------------------------------------------------------------------------------------------|--|-----------------------------------------------|--|-----------------------------------------------------------------|
| Time frame: Since the initial planning of the work                                                                               |                                                                                                                                                                                |                                                                                                                                                                                                                                                                                                                                                                                                                                                                                                                                                                                                                                                                                                                                                                                                                       |                                                                                                                                  |                                                                                                                                                                            |  |                                                                                                     |  |                                               |  |                                                                 |
| <b>1</b>                                                                                                                         | All support for the present manuscript (e.g., funding, provision of study materials, medical writing, article processing charges, etc.)<br><b>No time limit for this item.</b> | <input type="checkbox"/> <b>None</b><br><br><table border="1" style="width: 100%; border-collapse: collapse;"> <tr> <td style="width: 60%;">General funding started in 01.04.2020 and ended 31.05.2022<br/><b>German Federal Ministry of Health funded the clinical trial</b></td> <td style="width: 40%;">German Federal Ministry of Health funded the clinical trial. Expense reimbursement for patient treatment paid by the sponsor DRK Blutspendedienst Baden-Württemberg Hessen</td> </tr> <tr> <td></td> <td>up to 630 € per enrolled donor including first plasmapheresis, 420 € per subsequent plasma donation</td> </tr> <tr> <td></td> <td>up to 310 € per donor in the follow up period</td> </tr> <tr> <td></td> <td>All paid to participating institution [not to the investigator]</td> </tr> </table> | General funding started in 01.04.2020 and ended 31.05.2022<br><b>German Federal Ministry of Health funded the clinical trial</b> | German Federal Ministry of Health funded the clinical trial. Expense reimbursement for patient treatment paid by the sponsor DRK Blutspendedienst Baden-Württemberg Hessen |  | up to 630 € per enrolled donor including first plasmapheresis, 420 € per subsequent plasma donation |  | up to 310 € per donor in the follow up period |  | All paid to participating institution [not to the investigator] |
| General funding started in 01.04.2020 and ended 31.05.2022<br><b>German Federal Ministry of Health funded the clinical trial</b> | German Federal Ministry of Health funded the clinical trial. Expense reimbursement for patient treatment paid by the sponsor DRK Blutspendedienst Baden-Württemberg Hessen     |                                                                                                                                                                                                                                                                                                                                                                                                                                                                                                                                                                                                                                                                                                                                                                                                                       |                                                                                                                                  |                                                                                                                                                                            |  |                                                                                                     |  |                                               |  |                                                                 |
|                                                                                                                                  | up to 630 € per enrolled donor including first plasmapheresis, 420 € per subsequent plasma donation                                                                            |                                                                                                                                                                                                                                                                                                                                                                                                                                                                                                                                                                                                                                                                                                                                                                                                                       |                                                                                                                                  |                                                                                                                                                                            |  |                                                                                                     |  |                                               |  |                                                                 |
|                                                                                                                                  | up to 310 € per donor in the follow up period                                                                                                                                  |                                                                                                                                                                                                                                                                                                                                                                                                                                                                                                                                                                                                                                                                                                                                                                                                                       |                                                                                                                                  |                                                                                                                                                                            |  |                                                                                                     |  |                                               |  |                                                                 |
|                                                                                                                                  | All paid to participating institution [not to the investigator]                                                                                                                |                                                                                                                                                                                                                                                                                                                                                                                                                                                                                                                                                                                                                                                                                                                                                                                                                       |                                                                                                                                  |                                                                                                                                                                            |  |                                                                                                     |  |                                               |  |                                                                 |
| Time frame: past 36 months                                                                                                       |                                                                                                                                                                                |                                                                                                                                                                                                                                                                                                                                                                                                                                                                                                                                                                                                                                                                                                                                                                                                                       |                                                                                                                                  |                                                                                                                                                                            |  |                                                                                                     |  |                                               |  |                                                                 |
| <b>2</b>                                                                                                                         | Grants or contracts from any entity (if not indicated in item #1 above).                                                                                                       | <input checked="" type="checkbox"/> <b>None</b><br><br><table border="1" style="width: 100%; border-collapse: collapse;"> <tr><td style="width: 60%; height: 20px;"></td><td style="width: 40%;"></td></tr> <tr><td style="height: 20px;"></td><td></td></tr> <tr><td style="height: 20px;"></td><td></td></tr> </table>                                                                                                                                                                                                                                                                                                                                                                                                                                                                                              |                                                                                                                                  |                                                                                                                                                                            |  |                                                                                                     |  |                                               |  |                                                                 |
|                                                                                                                                  |                                                                                                                                                                                |                                                                                                                                                                                                                                                                                                                                                                                                                                                                                                                                                                                                                                                                                                                                                                                                                       |                                                                                                                                  |                                                                                                                                                                            |  |                                                                                                     |  |                                               |  |                                                                 |
|                                                                                                                                  |                                                                                                                                                                                |                                                                                                                                                                                                                                                                                                                                                                                                                                                                                                                                                                                                                                                                                                                                                                                                                       |                                                                                                                                  |                                                                                                                                                                            |  |                                                                                                     |  |                                               |  |                                                                 |
|                                                                                                                                  |                                                                                                                                                                                |                                                                                                                                                                                                                                                                                                                                                                                                                                                                                                                                                                                                                                                                                                                                                                                                                       |                                                                                                                                  |                                                                                                                                                                            |  |                                                                                                     |  |                                               |  |                                                                 |

|          | Name all entities with whom you have this relationship or indicate none (add rows as needed)                 | Specifications/Comments (e.g., if payments were made to you or to your institution)                                                                                                               |  |  |  |  |  |  |
|----------|--------------------------------------------------------------------------------------------------------------|---------------------------------------------------------------------------------------------------------------------------------------------------------------------------------------------------|--|--|--|--|--|--|
| <b>3</b> | Royalties or licenses                                                                                        | <input checked="" type="checkbox"/> <b>None</b><br><table border="1" data-bbox="437 383 1540 488"> <tr><td></td><td></td></tr> <tr><td></td><td></td></tr> <tr><td></td><td></td></tr> </table>   |  |  |  |  |  |  |
|          |                                                                                                              |                                                                                                                                                                                                   |  |  |  |  |  |  |
|          |                                                                                                              |                                                                                                                                                                                                   |  |  |  |  |  |  |
|          |                                                                                                              |                                                                                                                                                                                                   |  |  |  |  |  |  |
| <b>4</b> | Consulting fees                                                                                              | <input checked="" type="checkbox"/> <b>None</b><br><table border="1" data-bbox="437 629 1540 734"> <tr><td></td><td></td></tr> <tr><td></td><td></td></tr> <tr><td></td><td></td></tr> </table>   |  |  |  |  |  |  |
|          |                                                                                                              |                                                                                                                                                                                                   |  |  |  |  |  |  |
|          |                                                                                                              |                                                                                                                                                                                                   |  |  |  |  |  |  |
|          |                                                                                                              |                                                                                                                                                                                                   |  |  |  |  |  |  |
| <b>5</b> | Payment or honoraria for lectures, presentations, speakers bureaus, manuscript writing or educational events | <input checked="" type="checkbox"/> <b>None</b><br><table border="1" data-bbox="437 853 1540 958"> <tr><td></td><td></td></tr> <tr><td></td><td></td></tr> <tr><td></td><td></td></tr> </table>   |  |  |  |  |  |  |
|          |                                                                                                              |                                                                                                                                                                                                   |  |  |  |  |  |  |
|          |                                                                                                              |                                                                                                                                                                                                   |  |  |  |  |  |  |
|          |                                                                                                              |                                                                                                                                                                                                   |  |  |  |  |  |  |
| <b>6</b> | Payment for expert testimony                                                                                 | <input checked="" type="checkbox"/> <b>None</b><br><table border="1" data-bbox="437 1200 1540 1305"> <tr><td></td><td></td></tr> <tr><td></td><td></td></tr> <tr><td></td><td></td></tr> </table> |  |  |  |  |  |  |
|          |                                                                                                              |                                                                                                                                                                                                   |  |  |  |  |  |  |
|          |                                                                                                              |                                                                                                                                                                                                   |  |  |  |  |  |  |
|          |                                                                                                              |                                                                                                                                                                                                   |  |  |  |  |  |  |
| <b>7</b> | Support for attending meetings and/or travel                                                                 | <input checked="" type="checkbox"/> <b>None</b><br><table border="1" data-bbox="437 1413 1540 1518"> <tr><td></td><td></td></tr> <tr><td></td><td></td></tr> <tr><td></td><td></td></tr> </table> |  |  |  |  |  |  |
|          |                                                                                                              |                                                                                                                                                                                                   |  |  |  |  |  |  |
|          |                                                                                                              |                                                                                                                                                                                                   |  |  |  |  |  |  |
|          |                                                                                                              |                                                                                                                                                                                                   |  |  |  |  |  |  |
| <b>8</b> | Patents planned, issued or pending                                                                           | <input checked="" type="checkbox"/> <b>None</b><br><table border="1" data-bbox="437 1637 1540 1742"> <tr><td></td><td></td></tr> <tr><td></td><td></td></tr> <tr><td></td><td></td></tr> </table> |  |  |  |  |  |  |
|          |                                                                                                              |                                                                                                                                                                                                   |  |  |  |  |  |  |
|          |                                                                                                              |                                                                                                                                                                                                   |  |  |  |  |  |  |
|          |                                                                                                              |                                                                                                                                                                                                   |  |  |  |  |  |  |
| <b>9</b> | Participation on a Data Safety Monitoring Board or Advisory Board                                            | <input checked="" type="checkbox"/> <b>None</b><br><table border="1" data-bbox="437 1861 1540 1966"> <tr><td></td><td></td></tr> <tr><td></td><td></td></tr> <tr><td></td><td></td></tr> </table> |  |  |  |  |  |  |
|          |                                                                                                              |                                                                                                                                                                                                   |  |  |  |  |  |  |
|          |                                                                                                              |                                                                                                                                                                                                   |  |  |  |  |  |  |
|          |                                                                                                              |                                                                                                                                                                                                   |  |  |  |  |  |  |

|           | Name all entities with whom you have this relationship or indicate none (add rows as needed)      | Specifications/Comments (e.g., if payments were made to you or to your institution)                                                                                                               |  |  |  |  |  |  |
|-----------|---------------------------------------------------------------------------------------------------|---------------------------------------------------------------------------------------------------------------------------------------------------------------------------------------------------|--|--|--|--|--|--|
| <b>10</b> | Leadership or fiduciary role in other board, society, committee or advocacy group, paid or unpaid | <input checked="" type="checkbox"/> <b>None</b><br><table border="1" data-bbox="437 383 1541 488"> <tr><td></td><td></td></tr> <tr><td></td><td></td></tr> <tr><td></td><td></td></tr> </table>   |  |  |  |  |  |  |
|           |                                                                                                   |                                                                                                                                                                                                   |  |  |  |  |  |  |
|           |                                                                                                   |                                                                                                                                                                                                   |  |  |  |  |  |  |
|           |                                                                                                   |                                                                                                                                                                                                   |  |  |  |  |  |  |
| <b>11</b> | Stock or stock options                                                                            | <input checked="" type="checkbox"/> <b>None</b><br><table border="1" data-bbox="437 696 1541 801"> <tr><td></td><td></td></tr> <tr><td></td><td></td></tr> <tr><td></td><td></td></tr> </table>   |  |  |  |  |  |  |
|           |                                                                                                   |                                                                                                                                                                                                   |  |  |  |  |  |  |
|           |                                                                                                   |                                                                                                                                                                                                   |  |  |  |  |  |  |
|           |                                                                                                   |                                                                                                                                                                                                   |  |  |  |  |  |  |
| <b>12</b> | Receipt of equipment, materials, drugs, medical writing, gifts or other services                  | <input checked="" type="checkbox"/> <b>None</b><br><table border="1" data-bbox="437 916 1541 1021"> <tr><td></td><td></td></tr> <tr><td></td><td></td></tr> <tr><td></td><td></td></tr> </table>  |  |  |  |  |  |  |
|           |                                                                                                   |                                                                                                                                                                                                   |  |  |  |  |  |  |
|           |                                                                                                   |                                                                                                                                                                                                   |  |  |  |  |  |  |
|           |                                                                                                   |                                                                                                                                                                                                   |  |  |  |  |  |  |
| <b>13</b> | Other financial or non-financial interests                                                        | <input checked="" type="checkbox"/> <b>None</b><br><table border="1" data-bbox="437 1198 1541 1303"> <tr><td></td><td></td></tr> <tr><td></td><td></td></tr> <tr><td></td><td></td></tr> </table> |  |  |  |  |  |  |
|           |                                                                                                   |                                                                                                                                                                                                   |  |  |  |  |  |  |
|           |                                                                                                   |                                                                                                                                                                                                   |  |  |  |  |  |  |
|           |                                                                                                   |                                                                                                                                                                                                   |  |  |  |  |  |  |

**Please place an "X" next to the following statement to indicate your agreement:**

I certify that I have answered every question and have not altered the wording of any of the questions on this form.

## ICMJE DISCLOSURE FORM

**Date:** 9/15/2022

**Your Name:** Prof. Dr. Rainer Blasczyk

**Manuscript Title:** One-year follow-up of the CAPSID randomized trial for high-dose convalescent plasma in severe COVID-19 patients

**Manuscript Number (if known):** 163657-JCI-CMED-RV-2

In the interest of transparency, we ask you to disclose all relationships/activities/interests listed below that are related to the content of your manuscript. "Related" means any relation with for-profit or not-for-profit third parties whose interests may be affected by the content of the manuscript. Disclosure represents a commitment to transparency and does not necessarily indicate a bias. If you are in doubt about whether to list a relationship/activity/interest, it is preferable that you do so.

The author's relationships/activities/interests should be defined broadly. For example, if your manuscript pertains to the epidemiology of hypertension, you should declare all relationships with manufacturers of antihypertensive medication, even if that medication is not mentioned in the manuscript.

In item #1 below, report all support for the work reported in this manuscript without time limit. For all other items, the time frame for disclosure is the past 36 months.

|                                                                                                                               | Name all entities with whom you have this relationship or indicate none (add rows as needed)                                                                                   | Specifications/Comments (e.g., if payments were made to you or to your institution)                                                                                                                                                                                                                                                                                                                                                                                                                                                                                                                                 |                                                                                                                               |                                                                               |                |                                                                                                     |  |                                               |  |                                                                 |
|-------------------------------------------------------------------------------------------------------------------------------|--------------------------------------------------------------------------------------------------------------------------------------------------------------------------------|---------------------------------------------------------------------------------------------------------------------------------------------------------------------------------------------------------------------------------------------------------------------------------------------------------------------------------------------------------------------------------------------------------------------------------------------------------------------------------------------------------------------------------------------------------------------------------------------------------------------|-------------------------------------------------------------------------------------------------------------------------------|-------------------------------------------------------------------------------|----------------|-----------------------------------------------------------------------------------------------------|--|-----------------------------------------------|--|-----------------------------------------------------------------|
| Time frame: Since the initial planning of the work                                                                            |                                                                                                                                                                                |                                                                                                                                                                                                                                                                                                                                                                                                                                                                                                                                                                                                                     |                                                                                                                               |                                                                               |                |                                                                                                     |  |                                               |  |                                                                 |
| <b>1</b>                                                                                                                      | All support for the present manuscript (e.g., funding, provision of study materials, medical writing, article processing charges, etc.)<br><b>No time limit for this item.</b> | <input type="checkbox"/> <b>None</b><br><br><table border="1" style="width: 100%; border-collapse: collapse;"> <tr> <td style="width: 60%;">General funding started in 01.04.2020 and ended 31.05.2022 <b>German Federal Ministry of Health funded the clinical trial</b></td> <td></td> </tr> <tr> <td></td> <td>up to 630 € per enrolled donor including first plasmapheresis, 420 € per subsequent plasma donation</td> </tr> <tr> <td></td> <td>up to 310 € per donor in the follow up period</td> </tr> <tr> <td></td> <td>All paid to participating institution [not to the investigator]</td> </tr> </table> | General funding started in 01.04.2020 and ended 31.05.2022 <b>German Federal Ministry of Health funded the clinical trial</b> |                                                                               |                | up to 630 € per enrolled donor including first plasmapheresis, 420 € per subsequent plasma donation |  | up to 310 € per donor in the follow up period |  | All paid to participating institution [not to the investigator] |
| General funding started in 01.04.2020 and ended 31.05.2022 <b>German Federal Ministry of Health funded the clinical trial</b> |                                                                                                                                                                                |                                                                                                                                                                                                                                                                                                                                                                                                                                                                                                                                                                                                                     |                                                                                                                               |                                                                               |                |                                                                                                     |  |                                               |  |                                                                 |
|                                                                                                                               | up to 630 € per enrolled donor including first plasmapheresis, 420 € per subsequent plasma donation                                                                            |                                                                                                                                                                                                                                                                                                                                                                                                                                                                                                                                                                                                                     |                                                                                                                               |                                                                               |                |                                                                                                     |  |                                               |  |                                                                 |
|                                                                                                                               | up to 310 € per donor in the follow up period                                                                                                                                  |                                                                                                                                                                                                                                                                                                                                                                                                                                                                                                                                                                                                                     |                                                                                                                               |                                                                               |                |                                                                                                     |  |                                               |  |                                                                 |
|                                                                                                                               | All paid to participating institution [not to the investigator]                                                                                                                |                                                                                                                                                                                                                                                                                                                                                                                                                                                                                                                                                                                                                     |                                                                                                                               |                                                                               |                |                                                                                                     |  |                                               |  |                                                                 |
| Time frame: past 36 months                                                                                                    |                                                                                                                                                                                |                                                                                                                                                                                                                                                                                                                                                                                                                                                                                                                                                                                                                     |                                                                                                                               |                                                                               |                |                                                                                                     |  |                                               |  |                                                                 |
| <b>2</b>                                                                                                                      | Grants or contracts from any entity (if not indicated in item #1 above).                                                                                                       | <input type="checkbox"/> <b>None</b><br><br><table border="1" style="width: 100%; border-collapse: collapse;"> <tr> <td style="width: 60%;"><b>German Federal Ministry of Health</b></td> <td>Funding of clinical trial on convalescent plasma; payment made to institution</td> </tr> <tr> <td>European Union</td> <td>Funding for infrastructure to produce convalescent plasma: payment made to institution</td> </tr> <tr> <td></td> <td></td> </tr> </table>                                                                                                                                                   | <b>German Federal Ministry of Health</b>                                                                                      | Funding of clinical trial on convalescent plasma; payment made to institution | European Union | Funding for infrastructure to produce convalescent plasma: payment made to institution              |  |                                               |  |                                                                 |
| <b>German Federal Ministry of Health</b>                                                                                      | Funding of clinical trial on convalescent plasma; payment made to institution                                                                                                  |                                                                                                                                                                                                                                                                                                                                                                                                                                                                                                                                                                                                                     |                                                                                                                               |                                                                               |                |                                                                                                     |  |                                               |  |                                                                 |
| European Union                                                                                                                | Funding for infrastructure to produce convalescent plasma: payment made to institution                                                                                         |                                                                                                                                                                                                                                                                                                                                                                                                                                                                                                                                                                                                                     |                                                                                                                               |                                                                               |                |                                                                                                     |  |                                               |  |                                                                 |
|                                                                                                                               |                                                                                                                                                                                |                                                                                                                                                                                                                                                                                                                                                                                                                                                                                                                                                                                                                     |                                                                                                                               |                                                                               |                |                                                                                                     |  |                                               |  |                                                                 |

|          | Name all entities with whom you have this relationship or indicate none (add rows as needed)                 | Specifications/Comments (e.g., if payments were made to you or to your institution)                                                                                                               |  |  |  |  |  |  |
|----------|--------------------------------------------------------------------------------------------------------------|---------------------------------------------------------------------------------------------------------------------------------------------------------------------------------------------------|--|--|--|--|--|--|
| <b>3</b> | Royalties or licenses                                                                                        | <input checked="" type="checkbox"/> <b>None</b><br><table border="1" data-bbox="437 385 1541 488"> <tr><td></td><td></td></tr> <tr><td></td><td></td></tr> <tr><td></td><td></td></tr> </table>   |  |  |  |  |  |  |
|          |                                                                                                              |                                                                                                                                                                                                   |  |  |  |  |  |  |
|          |                                                                                                              |                                                                                                                                                                                                   |  |  |  |  |  |  |
|          |                                                                                                              |                                                                                                                                                                                                   |  |  |  |  |  |  |
| <b>4</b> | Consulting fees                                                                                              | <input checked="" type="checkbox"/> <b>None</b><br><table border="1" data-bbox="437 631 1541 734"> <tr><td></td><td></td></tr> <tr><td></td><td></td></tr> <tr><td></td><td></td></tr> </table>   |  |  |  |  |  |  |
|          |                                                                                                              |                                                                                                                                                                                                   |  |  |  |  |  |  |
|          |                                                                                                              |                                                                                                                                                                                                   |  |  |  |  |  |  |
|          |                                                                                                              |                                                                                                                                                                                                   |  |  |  |  |  |  |
| <b>5</b> | Payment or honoraria for lectures, presentations, speakers bureaus, manuscript writing or educational events | <input checked="" type="checkbox"/> <b>None</b><br><table border="1" data-bbox="437 855 1541 958"> <tr><td></td><td></td></tr> <tr><td></td><td></td></tr> <tr><td></td><td></td></tr> </table>   |  |  |  |  |  |  |
|          |                                                                                                              |                                                                                                                                                                                                   |  |  |  |  |  |  |
|          |                                                                                                              |                                                                                                                                                                                                   |  |  |  |  |  |  |
|          |                                                                                                              |                                                                                                                                                                                                   |  |  |  |  |  |  |
| <b>6</b> | Payment for expert testimony                                                                                 | <input checked="" type="checkbox"/> <b>None</b><br><table border="1" data-bbox="437 1200 1541 1303"> <tr><td></td><td></td></tr> <tr><td></td><td></td></tr> <tr><td></td><td></td></tr> </table> |  |  |  |  |  |  |
|          |                                                                                                              |                                                                                                                                                                                                   |  |  |  |  |  |  |
|          |                                                                                                              |                                                                                                                                                                                                   |  |  |  |  |  |  |
|          |                                                                                                              |                                                                                                                                                                                                   |  |  |  |  |  |  |
| <b>7</b> | Support for attending meetings and/or travel                                                                 | <input checked="" type="checkbox"/> <b>None</b><br><table border="1" data-bbox="437 1415 1541 1518"> <tr><td></td><td></td></tr> <tr><td></td><td></td></tr> <tr><td></td><td></td></tr> </table> |  |  |  |  |  |  |
|          |                                                                                                              |                                                                                                                                                                                                   |  |  |  |  |  |  |
|          |                                                                                                              |                                                                                                                                                                                                   |  |  |  |  |  |  |
|          |                                                                                                              |                                                                                                                                                                                                   |  |  |  |  |  |  |
| <b>8</b> | Patents planned, issued or pending                                                                           | <input checked="" type="checkbox"/> <b>None</b><br><table border="1" data-bbox="437 1639 1541 1742"> <tr><td></td><td></td></tr> <tr><td></td><td></td></tr> <tr><td></td><td></td></tr> </table> |  |  |  |  |  |  |
|          |                                                                                                              |                                                                                                                                                                                                   |  |  |  |  |  |  |
|          |                                                                                                              |                                                                                                                                                                                                   |  |  |  |  |  |  |
|          |                                                                                                              |                                                                                                                                                                                                   |  |  |  |  |  |  |
| <b>9</b> | Participation on a Data Safety Monitoring Board or Advisory Board                                            | <input checked="" type="checkbox"/> <b>None</b><br><table border="1" data-bbox="437 1863 1541 1966"> <tr><td></td><td></td></tr> <tr><td></td><td></td></tr> <tr><td></td><td></td></tr> </table> |  |  |  |  |  |  |
|          |                                                                                                              |                                                                                                                                                                                                   |  |  |  |  |  |  |
|          |                                                                                                              |                                                                                                                                                                                                   |  |  |  |  |  |  |
|          |                                                                                                              |                                                                                                                                                                                                   |  |  |  |  |  |  |

|           | Name all entities with whom you have this relationship or indicate none (add rows as needed)      | Specifications/Comments (e.g., if payments were made to you or to your institution)                                                                                                               |  |  |  |  |  |  |
|-----------|---------------------------------------------------------------------------------------------------|---------------------------------------------------------------------------------------------------------------------------------------------------------------------------------------------------|--|--|--|--|--|--|
| <b>10</b> | Leadership or fiduciary role in other board, society, committee or advocacy group, paid or unpaid | <input checked="" type="checkbox"/> <b>None</b><br><table border="1" data-bbox="437 383 1541 488"> <tr><td></td><td></td></tr> <tr><td></td><td></td></tr> <tr><td></td><td></td></tr> </table>   |  |  |  |  |  |  |
|           |                                                                                                   |                                                                                                                                                                                                   |  |  |  |  |  |  |
|           |                                                                                                   |                                                                                                                                                                                                   |  |  |  |  |  |  |
|           |                                                                                                   |                                                                                                                                                                                                   |  |  |  |  |  |  |
| <b>11</b> | Stock or stock options                                                                            | <input checked="" type="checkbox"/> <b>None</b><br><table border="1" data-bbox="437 696 1541 801"> <tr><td></td><td></td></tr> <tr><td></td><td></td></tr> <tr><td></td><td></td></tr> </table>   |  |  |  |  |  |  |
|           |                                                                                                   |                                                                                                                                                                                                   |  |  |  |  |  |  |
|           |                                                                                                   |                                                                                                                                                                                                   |  |  |  |  |  |  |
|           |                                                                                                   |                                                                                                                                                                                                   |  |  |  |  |  |  |
| <b>12</b> | Receipt of equipment, materials, drugs, medical writing, gifts or other services                  | <input checked="" type="checkbox"/> <b>None</b><br><table border="1" data-bbox="437 916 1541 1021"> <tr><td></td><td></td></tr> <tr><td></td><td></td></tr> <tr><td></td><td></td></tr> </table>  |  |  |  |  |  |  |
|           |                                                                                                   |                                                                                                                                                                                                   |  |  |  |  |  |  |
|           |                                                                                                   |                                                                                                                                                                                                   |  |  |  |  |  |  |
|           |                                                                                                   |                                                                                                                                                                                                   |  |  |  |  |  |  |
| <b>13</b> | Other financial or non-financial interests                                                        | <input checked="" type="checkbox"/> <b>None</b><br><table border="1" data-bbox="437 1198 1541 1303"> <tr><td></td><td></td></tr> <tr><td></td><td></td></tr> <tr><td></td><td></td></tr> </table> |  |  |  |  |  |  |
|           |                                                                                                   |                                                                                                                                                                                                   |  |  |  |  |  |  |
|           |                                                                                                   |                                                                                                                                                                                                   |  |  |  |  |  |  |
|           |                                                                                                   |                                                                                                                                                                                                   |  |  |  |  |  |  |

**Please place an "X" next to the following statement to indicate your agreement:**

I certify that I have answered every question and have not altered the wording of any of the questions on this form.

## ICMJE DISCLOSURE FORM

**Date:** 9/15/2022

**Your Name:** Prof. Dr. Harald Klüter

**Manuscript Title:** One-year follow-up of the CAPSID randomized trial for high-dose convalescent plasma in severe COVID-19 patients

**Manuscript Number (if known):** 163657-JCI-CMED-RV-2

In the interest of transparency, we ask you to disclose all relationships/activities/interests listed below that are related to the content of your manuscript. "Related" means any relation with for-profit or not-for-profit third parties whose interests may be affected by the content of the manuscript. Disclosure represents a commitment to transparency and does not necessarily indicate a bias. If you are in doubt about whether to list a relationship/activity/interest, it is preferable that you do so.

The author's relationships/activities/interests should be defined broadly. For example, if your manuscript pertains to the epidemiology of hypertension, you should declare all relationships with manufacturers of antihypertensive medication, even if that medication is not mentioned in the manuscript.

In item #1 below, report all support for the work reported in this manuscript without time limit. For all other items, the time frame for disclosure is the past 36 months.

|                                                                                                                                  | Name all entities with whom you have this relationship or indicate none (add rows as needed)                                                                                      | Specifications/Comments (e.g., if payments were made to you or to your institution)                                                                                                                                                                                                                                                                                                                                                                                                                                                                                                                                                                                                                                                                                                                                          |                                                                                                                                  |                                                                                                                                                                                   |  |                                                                                                     |  |                                               |  |                                                                 |
|----------------------------------------------------------------------------------------------------------------------------------|-----------------------------------------------------------------------------------------------------------------------------------------------------------------------------------|------------------------------------------------------------------------------------------------------------------------------------------------------------------------------------------------------------------------------------------------------------------------------------------------------------------------------------------------------------------------------------------------------------------------------------------------------------------------------------------------------------------------------------------------------------------------------------------------------------------------------------------------------------------------------------------------------------------------------------------------------------------------------------------------------------------------------|----------------------------------------------------------------------------------------------------------------------------------|-----------------------------------------------------------------------------------------------------------------------------------------------------------------------------------|--|-----------------------------------------------------------------------------------------------------|--|-----------------------------------------------|--|-----------------------------------------------------------------|
| Time frame: Since the initial planning of the work                                                                               |                                                                                                                                                                                   |                                                                                                                                                                                                                                                                                                                                                                                                                                                                                                                                                                                                                                                                                                                                                                                                                              |                                                                                                                                  |                                                                                                                                                                                   |  |                                                                                                     |  |                                               |  |                                                                 |
| <b>1</b>                                                                                                                         | All support for the present manuscript (e.g., funding, provision of study materials, medical writing, article processing charges, etc.)<br><b>No time limit for this item.</b>    | <input type="checkbox"/> <b>None</b><br><br><table border="1" style="width: 100%; border-collapse: collapse;"> <tr> <td style="width: 60%;">General funding started in 01.04.2020 and ended 31.05.2022<br/><b>German Federal Ministry of Health funded the clinical trial</b></td> <td style="width: 40%;"><b>German Federal Ministry of Health funded the clinical trial. Expense reimbursement for patient treatment paid by the sponsor DRK Blutspendedienst Baden-Württemberg Hesser</b></td> </tr> <tr> <td></td> <td>up to 630 € per enrolled donor including first plasmapheresis, 420 € per subsequent plasma donation</td> </tr> <tr> <td></td> <td>up to 310 € per donor in the follow up period</td> </tr> <tr> <td></td> <td>All paid to participating institution [not to the investigator]</td> </tr> </table> | General funding started in 01.04.2020 and ended 31.05.2022<br><b>German Federal Ministry of Health funded the clinical trial</b> | <b>German Federal Ministry of Health funded the clinical trial. Expense reimbursement for patient treatment paid by the sponsor DRK Blutspendedienst Baden-Württemberg Hesser</b> |  | up to 630 € per enrolled donor including first plasmapheresis, 420 € per subsequent plasma donation |  | up to 310 € per donor in the follow up period |  | All paid to participating institution [not to the investigator] |
| General funding started in 01.04.2020 and ended 31.05.2022<br><b>German Federal Ministry of Health funded the clinical trial</b> | <b>German Federal Ministry of Health funded the clinical trial. Expense reimbursement for patient treatment paid by the sponsor DRK Blutspendedienst Baden-Württemberg Hesser</b> |                                                                                                                                                                                                                                                                                                                                                                                                                                                                                                                                                                                                                                                                                                                                                                                                                              |                                                                                                                                  |                                                                                                                                                                                   |  |                                                                                                     |  |                                               |  |                                                                 |
|                                                                                                                                  | up to 630 € per enrolled donor including first plasmapheresis, 420 € per subsequent plasma donation                                                                               |                                                                                                                                                                                                                                                                                                                                                                                                                                                                                                                                                                                                                                                                                                                                                                                                                              |                                                                                                                                  |                                                                                                                                                                                   |  |                                                                                                     |  |                                               |  |                                                                 |
|                                                                                                                                  | up to 310 € per donor in the follow up period                                                                                                                                     |                                                                                                                                                                                                                                                                                                                                                                                                                                                                                                                                                                                                                                                                                                                                                                                                                              |                                                                                                                                  |                                                                                                                                                                                   |  |                                                                                                     |  |                                               |  |                                                                 |
|                                                                                                                                  | All paid to participating institution [not to the investigator]                                                                                                                   |                                                                                                                                                                                                                                                                                                                                                                                                                                                                                                                                                                                                                                                                                                                                                                                                                              |                                                                                                                                  |                                                                                                                                                                                   |  |                                                                                                     |  |                                               |  |                                                                 |
| Time frame: past 36 months                                                                                                       |                                                                                                                                                                                   |                                                                                                                                                                                                                                                                                                                                                                                                                                                                                                                                                                                                                                                                                                                                                                                                                              |                                                                                                                                  |                                                                                                                                                                                   |  |                                                                                                     |  |                                               |  |                                                                 |
| <b>2</b>                                                                                                                         | Grants or contracts from any entity (if not indicated in item #1 above).                                                                                                          | <input checked="" type="checkbox"/> <b>None</b><br><br><table border="1" style="width: 100%; border-collapse: collapse;"> <tr><td style="width: 60%; height: 20px;"></td><td style="width: 40%;"></td></tr> <tr><td style="height: 20px;"></td><td></td></tr> <tr><td style="height: 20px;"></td><td></td></tr> </table>                                                                                                                                                                                                                                                                                                                                                                                                                                                                                                     |                                                                                                                                  |                                                                                                                                                                                   |  |                                                                                                     |  |                                               |  |                                                                 |
|                                                                                                                                  |                                                                                                                                                                                   |                                                                                                                                                                                                                                                                                                                                                                                                                                                                                                                                                                                                                                                                                                                                                                                                                              |                                                                                                                                  |                                                                                                                                                                                   |  |                                                                                                     |  |                                               |  |                                                                 |
|                                                                                                                                  |                                                                                                                                                                                   |                                                                                                                                                                                                                                                                                                                                                                                                                                                                                                                                                                                                                                                                                                                                                                                                                              |                                                                                                                                  |                                                                                                                                                                                   |  |                                                                                                     |  |                                               |  |                                                                 |
|                                                                                                                                  |                                                                                                                                                                                   |                                                                                                                                                                                                                                                                                                                                                                                                                                                                                                                                                                                                                                                                                                                                                                                                                              |                                                                                                                                  |                                                                                                                                                                                   |  |                                                                                                     |  |                                               |  |                                                                 |



|          | Name all entities with whom you have this relationship or indicate none (add rows as needed)                 | Specifications/Comments (e.g., if payments were made to you or to your institution)                                                                                                                     |  |  |  |  |  |  |
|----------|--------------------------------------------------------------------------------------------------------------|---------------------------------------------------------------------------------------------------------------------------------------------------------------------------------------------------------|--|--|--|--|--|--|
| <b>3</b> | Royalties or licenses                                                                                        | <input checked="" type="checkbox"/> <b>None</b><br><table border="1" data-bbox="437 383 1011 488"> <tr><td> </td><td> </td></tr> <tr><td> </td><td> </td></tr> <tr><td> </td><td> </td></tr> </table>   |  |  |  |  |  |  |
|          |                                                                                                              |                                                                                                                                                                                                         |  |  |  |  |  |  |
|          |                                                                                                              |                                                                                                                                                                                                         |  |  |  |  |  |  |
|          |                                                                                                              |                                                                                                                                                                                                         |  |  |  |  |  |  |
| <b>4</b> | Consulting fees                                                                                              | <input checked="" type="checkbox"/> <b>None</b><br><table border="1" data-bbox="437 629 1011 734"> <tr><td> </td><td> </td></tr> <tr><td> </td><td> </td></tr> <tr><td> </td><td> </td></tr> </table>   |  |  |  |  |  |  |
|          |                                                                                                              |                                                                                                                                                                                                         |  |  |  |  |  |  |
|          |                                                                                                              |                                                                                                                                                                                                         |  |  |  |  |  |  |
|          |                                                                                                              |                                                                                                                                                                                                         |  |  |  |  |  |  |
| <b>5</b> | Payment or honoraria for lectures, presentations, speakers bureaus, manuscript writing or educational events | <input checked="" type="checkbox"/> <b>None</b><br><table border="1" data-bbox="437 853 1011 958"> <tr><td> </td><td> </td></tr> <tr><td> </td><td> </td></tr> <tr><td> </td><td> </td></tr> </table>   |  |  |  |  |  |  |
|          |                                                                                                              |                                                                                                                                                                                                         |  |  |  |  |  |  |
|          |                                                                                                              |                                                                                                                                                                                                         |  |  |  |  |  |  |
|          |                                                                                                              |                                                                                                                                                                                                         |  |  |  |  |  |  |
| <b>6</b> | Payment for expert testimony                                                                                 | <input checked="" type="checkbox"/> <b>None</b><br><table border="1" data-bbox="437 1200 1011 1305"> <tr><td> </td><td> </td></tr> <tr><td> </td><td> </td></tr> <tr><td> </td><td> </td></tr> </table> |  |  |  |  |  |  |
|          |                                                                                                              |                                                                                                                                                                                                         |  |  |  |  |  |  |
|          |                                                                                                              |                                                                                                                                                                                                         |  |  |  |  |  |  |
|          |                                                                                                              |                                                                                                                                                                                                         |  |  |  |  |  |  |
| <b>7</b> | Support for attending meetings and/or travel                                                                 | <input checked="" type="checkbox"/> <b>None</b><br><table border="1" data-bbox="437 1413 1011 1518"> <tr><td> </td><td> </td></tr> <tr><td> </td><td> </td></tr> <tr><td> </td><td> </td></tr> </table> |  |  |  |  |  |  |
|          |                                                                                                              |                                                                                                                                                                                                         |  |  |  |  |  |  |
|          |                                                                                                              |                                                                                                                                                                                                         |  |  |  |  |  |  |
|          |                                                                                                              |                                                                                                                                                                                                         |  |  |  |  |  |  |
| <b>8</b> | Patents planned, issued or pending                                                                           | <input checked="" type="checkbox"/> <b>None</b><br><table border="1" data-bbox="437 1637 1011 1742"> <tr><td> </td><td> </td></tr> <tr><td> </td><td> </td></tr> <tr><td> </td><td> </td></tr> </table> |  |  |  |  |  |  |
|          |                                                                                                              |                                                                                                                                                                                                         |  |  |  |  |  |  |
|          |                                                                                                              |                                                                                                                                                                                                         |  |  |  |  |  |  |
|          |                                                                                                              |                                                                                                                                                                                                         |  |  |  |  |  |  |
| <b>9</b> | Participation on a Data Safety Monitoring Board or Advisory Board                                            | <input checked="" type="checkbox"/> <b>None</b><br><table border="1" data-bbox="437 1861 1011 1966"> <tr><td> </td><td> </td></tr> <tr><td> </td><td> </td></tr> <tr><td> </td><td> </td></tr> </table> |  |  |  |  |  |  |
|          |                                                                                                              |                                                                                                                                                                                                         |  |  |  |  |  |  |
|          |                                                                                                              |                                                                                                                                                                                                         |  |  |  |  |  |  |
|          |                                                                                                              |                                                                                                                                                                                                         |  |  |  |  |  |  |

|           |                                                                                                   | Name all entities with whom you have this relationship or indicate none (add rows as needed) | Specifications/Comments (e.g., if payments were made to you or to your institution) |
|-----------|---------------------------------------------------------------------------------------------------|----------------------------------------------------------------------------------------------|-------------------------------------------------------------------------------------|
| <b>10</b> | Leadership or fiduciary role in other board, society, committee or advocacy group, paid or unpaid | <input checked="" type="checkbox"/> <b>None</b>                                              |                                                                                     |
|           |                                                                                                   |                                                                                              |                                                                                     |
|           |                                                                                                   |                                                                                              |                                                                                     |
|           |                                                                                                   |                                                                                              |                                                                                     |
| <b>11</b> | Stock or stock options                                                                            | <input checked="" type="checkbox"/> <b>None</b>                                              |                                                                                     |
|           |                                                                                                   |                                                                                              |                                                                                     |
|           |                                                                                                   |                                                                                              |                                                                                     |
|           |                                                                                                   |                                                                                              |                                                                                     |
| <b>12</b> | Receipt of equipment, materials, drugs, medical writing, gifts or other services                  | <input checked="" type="checkbox"/> <b>None</b>                                              |                                                                                     |
|           |                                                                                                   |                                                                                              |                                                                                     |
|           |                                                                                                   |                                                                                              |                                                                                     |
|           |                                                                                                   |                                                                                              |                                                                                     |
| <b>13</b> | Other financial or non-financial interests                                                        | <input checked="" type="checkbox"/> <b>None</b>                                              |                                                                                     |
|           |                                                                                                   |                                                                                              |                                                                                     |
|           |                                                                                                   |                                                                                              |                                                                                     |
|           |                                                                                                   |                                                                                              |                                                                                     |

**Please place an "X" next to the following statement to indicate your agreement:**

I certify that I have answered every question and have not altered the wording of any of the questions on this form.

## ICMJE DISCLOSURE FORM

**Date:** 9/15/2022

**Your Name:** PD Dr. Jan Pilch

**Manuscript Title:** One-year follow-up of the CAPSID randomized trial for high-dose convalescent plasma in severe COVID-19 patients

**Manuscript Number (if known):** 163657-JCI-CMED-RV-2

In the interest of transparency, we ask you to disclose all relationships/activities/interests listed below that are related to the content of your manuscript. "Related" means any relation with for-profit or not-for-profit third parties whose interests may be affected by the content of the manuscript. Disclosure represents a commitment to transparency and does not necessarily indicate a bias. If you are in doubt about whether to list a relationship/activity/interest, it is preferable that you do so.

The author's relationships/activities/interests should be defined broadly. For example, if your manuscript pertains to the epidemiology of hypertension, you should declare all relationships with manufacturers of antihypertensive medication, even if that medication is not mentioned in the manuscript.

In item #1 below, report all support for the work reported in this manuscript without time limit. For all other items, the time frame for disclosure is the past 36 months.

|                                                                                                                                  | Name all entities with whom you have this relationship or indicate none (add rows as needed)                                                                                      | Specifications/Comments (e.g., if payments were made to you or to your institution)                                                                                                                                                                                                                                                                                                                                                                                                                                                                                                                                                                                                                                                                                                                                          |                                                                                                                                  |                                                                                                                                                                                   |  |                                                                                                     |  |                                               |  |                                                                 |
|----------------------------------------------------------------------------------------------------------------------------------|-----------------------------------------------------------------------------------------------------------------------------------------------------------------------------------|------------------------------------------------------------------------------------------------------------------------------------------------------------------------------------------------------------------------------------------------------------------------------------------------------------------------------------------------------------------------------------------------------------------------------------------------------------------------------------------------------------------------------------------------------------------------------------------------------------------------------------------------------------------------------------------------------------------------------------------------------------------------------------------------------------------------------|----------------------------------------------------------------------------------------------------------------------------------|-----------------------------------------------------------------------------------------------------------------------------------------------------------------------------------|--|-----------------------------------------------------------------------------------------------------|--|-----------------------------------------------|--|-----------------------------------------------------------------|
| Time frame: Since the initial planning of the work                                                                               |                                                                                                                                                                                   |                                                                                                                                                                                                                                                                                                                                                                                                                                                                                                                                                                                                                                                                                                                                                                                                                              |                                                                                                                                  |                                                                                                                                                                                   |  |                                                                                                     |  |                                               |  |                                                                 |
| <b>1</b>                                                                                                                         | All support for the present manuscript (e.g., funding, provision of study materials, medical writing, article processing charges, etc.)<br><b>No time limit for this item.</b>    | <input type="checkbox"/> <b>None</b><br><br><table border="1" style="width: 100%; border-collapse: collapse;"> <tr> <td style="width: 60%;">General funding started in 01.04.2020 and ended 31.05.2022<br/><b>German Federal Ministry of Health funded the clinical trial</b></td> <td style="width: 40%;"><b>German Federal Ministry of Health funded the clinical trial. Expense reimbursement for patient treatment paid by the sponsor DRK Blutspendedienst Baden-Württemberg Hesser</b></td> </tr> <tr> <td></td> <td>up to 630 € per enrolled donor including first plasmapheresis, 420 € per subsequent plasma donation</td> </tr> <tr> <td></td> <td>up to 310 € per donor in the follow up period</td> </tr> <tr> <td></td> <td>All paid to participating institution [not to the investigator]</td> </tr> </table> | General funding started in 01.04.2020 and ended 31.05.2022<br><b>German Federal Ministry of Health funded the clinical trial</b> | <b>German Federal Ministry of Health funded the clinical trial. Expense reimbursement for patient treatment paid by the sponsor DRK Blutspendedienst Baden-Württemberg Hesser</b> |  | up to 630 € per enrolled donor including first plasmapheresis, 420 € per subsequent plasma donation |  | up to 310 € per donor in the follow up period |  | All paid to participating institution [not to the investigator] |
| General funding started in 01.04.2020 and ended 31.05.2022<br><b>German Federal Ministry of Health funded the clinical trial</b> | <b>German Federal Ministry of Health funded the clinical trial. Expense reimbursement for patient treatment paid by the sponsor DRK Blutspendedienst Baden-Württemberg Hesser</b> |                                                                                                                                                                                                                                                                                                                                                                                                                                                                                                                                                                                                                                                                                                                                                                                                                              |                                                                                                                                  |                                                                                                                                                                                   |  |                                                                                                     |  |                                               |  |                                                                 |
|                                                                                                                                  | up to 630 € per enrolled donor including first plasmapheresis, 420 € per subsequent plasma donation                                                                               |                                                                                                                                                                                                                                                                                                                                                                                                                                                                                                                                                                                                                                                                                                                                                                                                                              |                                                                                                                                  |                                                                                                                                                                                   |  |                                                                                                     |  |                                               |  |                                                                 |
|                                                                                                                                  | up to 310 € per donor in the follow up period                                                                                                                                     |                                                                                                                                                                                                                                                                                                                                                                                                                                                                                                                                                                                                                                                                                                                                                                                                                              |                                                                                                                                  |                                                                                                                                                                                   |  |                                                                                                     |  |                                               |  |                                                                 |
|                                                                                                                                  | All paid to participating institution [not to the investigator]                                                                                                                   |                                                                                                                                                                                                                                                                                                                                                                                                                                                                                                                                                                                                                                                                                                                                                                                                                              |                                                                                                                                  |                                                                                                                                                                                   |  |                                                                                                     |  |                                               |  |                                                                 |
| Time frame: past 36 months                                                                                                       |                                                                                                                                                                                   |                                                                                                                                                                                                                                                                                                                                                                                                                                                                                                                                                                                                                                                                                                                                                                                                                              |                                                                                                                                  |                                                                                                                                                                                   |  |                                                                                                     |  |                                               |  |                                                                 |
| <b>2</b>                                                                                                                         | Grants or contracts from any entity (if not indicated in item #1 above).                                                                                                          | <input checked="" type="checkbox"/> <b>None</b><br><br><table border="1" style="width: 100%; border-collapse: collapse;"> <tr><td style="width: 60%; height: 20px;"></td><td style="width: 40%;"></td></tr> <tr><td style="height: 20px;"></td><td></td></tr> <tr><td style="height: 20px;"></td><td></td></tr> </table>                                                                                                                                                                                                                                                                                                                                                                                                                                                                                                     |                                                                                                                                  |                                                                                                                                                                                   |  |                                                                                                     |  |                                               |  |                                                                 |
|                                                                                                                                  |                                                                                                                                                                                   |                                                                                                                                                                                                                                                                                                                                                                                                                                                                                                                                                                                                                                                                                                                                                                                                                              |                                                                                                                                  |                                                                                                                                                                                   |  |                                                                                                     |  |                                               |  |                                                                 |
|                                                                                                                                  |                                                                                                                                                                                   |                                                                                                                                                                                                                                                                                                                                                                                                                                                                                                                                                                                                                                                                                                                                                                                                                              |                                                                                                                                  |                                                                                                                                                                                   |  |                                                                                                     |  |                                               |  |                                                                 |
|                                                                                                                                  |                                                                                                                                                                                   |                                                                                                                                                                                                                                                                                                                                                                                                                                                                                                                                                                                                                                                                                                                                                                                                                              |                                                                                                                                  |                                                                                                                                                                                   |  |                                                                                                     |  |                                               |  |                                                                 |

|   |                                                                                                              | Name all entities with whom you have this relationship or indicate none (add rows as needed) | Specifications/Comments (e.g., if payments were made to you or to your institution) |
|---|--------------------------------------------------------------------------------------------------------------|----------------------------------------------------------------------------------------------|-------------------------------------------------------------------------------------|
| 3 | Royalties or licenses                                                                                        | <input checked="" type="checkbox"/> None                                                     |                                                                                     |
|   |                                                                                                              |                                                                                              |                                                                                     |
|   |                                                                                                              |                                                                                              |                                                                                     |
|   |                                                                                                              |                                                                                              |                                                                                     |
| 4 | Consulting fees                                                                                              | <input checked="" type="checkbox"/> None                                                     |                                                                                     |
|   |                                                                                                              |                                                                                              |                                                                                     |
|   |                                                                                                              |                                                                                              |                                                                                     |
|   |                                                                                                              |                                                                                              |                                                                                     |
| 5 | Payment or honoraria for lectures, presentations, speakers bureaus, manuscript writing or educational events | <input checked="" type="checkbox"/> None                                                     |                                                                                     |
|   |                                                                                                              |                                                                                              |                                                                                     |
|   |                                                                                                              |                                                                                              |                                                                                     |
|   |                                                                                                              |                                                                                              |                                                                                     |
| 6 | Payment for expert testimony                                                                                 | <input checked="" type="checkbox"/> None                                                     |                                                                                     |
|   |                                                                                                              |                                                                                              |                                                                                     |
|   |                                                                                                              |                                                                                              |                                                                                     |
|   |                                                                                                              |                                                                                              |                                                                                     |
| 7 | Support for attending meetings and/or travel                                                                 | <input checked="" type="checkbox"/> None                                                     |                                                                                     |
|   |                                                                                                              |                                                                                              |                                                                                     |
|   |                                                                                                              |                                                                                              |                                                                                     |
|   |                                                                                                              |                                                                                              |                                                                                     |
| 8 | Patents planned, issued or pending                                                                           | <input checked="" type="checkbox"/> None                                                     |                                                                                     |
|   |                                                                                                              |                                                                                              |                                                                                     |
|   |                                                                                                              |                                                                                              |                                                                                     |
|   |                                                                                                              |                                                                                              |                                                                                     |
| 9 | Participation on a Data Safety Monitoring Board or Advisory Board                                            | <input checked="" type="checkbox"/> None                                                     |                                                                                     |
|   |                                                                                                              |                                                                                              |                                                                                     |
|   |                                                                                                              |                                                                                              |                                                                                     |
|   |                                                                                                              |                                                                                              |                                                                                     |

|    |                                                                                                   | Name all entities with whom you have this relationship or indicate none (add rows as needed) | Specifications/Comments (e.g., if payments were made to you or to your institution) |
|----|---------------------------------------------------------------------------------------------------|----------------------------------------------------------------------------------------------|-------------------------------------------------------------------------------------|
| 10 | Leadership or fiduciary role in other board, society, committee or advocacy group, paid or unpaid | <input checked="" type="checkbox"/> None                                                     |                                                                                     |
|    |                                                                                                   |                                                                                              |                                                                                     |
|    |                                                                                                   |                                                                                              |                                                                                     |
|    |                                                                                                   |                                                                                              |                                                                                     |
| 11 | Stock or stock options                                                                            | <input checked="" type="checkbox"/> None                                                     |                                                                                     |
|    |                                                                                                   |                                                                                              |                                                                                     |
|    |                                                                                                   |                                                                                              |                                                                                     |
|    |                                                                                                   |                                                                                              |                                                                                     |
| 12 | Receipt of equipment, materials, drugs, medical writing, gifts or other services                  | <input checked="" type="checkbox"/> None                                                     |                                                                                     |
|    |                                                                                                   |                                                                                              |                                                                                     |
|    |                                                                                                   |                                                                                              |                                                                                     |
|    |                                                                                                   |                                                                                              |                                                                                     |
| 13 | Other financial or non-financial interests                                                        | <input checked="" type="checkbox"/> None                                                     |                                                                                     |
|    |                                                                                                   |                                                                                              |                                                                                     |
|    |                                                                                                   |                                                                                              |                                                                                     |
|    |                                                                                                   |                                                                                              |                                                                                     |

Please place an "X" next to the following statement to indicate your agreement:

I certify that I have answered every question and have not altered the wording of any of the questions on this form.

## ICMJE DISCLOSURE FORM

**Date:** 9/15/2022

**Your Name:** Dr. Joachim Schwäble

**Manuscript Title:** One-year follow-up of the CAPSID randomized trial for high-dose convalescent plasma in severe COVID-19 patients

**Manuscript Number (if known):** 163657-JCI-CMED-RV-2

In the interest of transparency, we ask you to disclose all relationships/activities/interests listed below that are related to the content of your manuscript. "Related" means any relation with for-profit or not-for-profit third parties whose interests may be affected by the content of the manuscript. Disclosure represents a commitment to transparency and does not necessarily indicate a bias. If you are in doubt about whether to list a relationship/activity/interest, it is preferable that you do so.

The author's relationships/activities/interests should be defined broadly. For example, if your manuscript pertains to the epidemiology of hypertension, you should declare all relationships with manufacturers of antihypertensive medication, even if that medication is not mentioned in the manuscript.

In item #1 below, report all support for the work reported in this manuscript without time limit. For all other items, the time frame for disclosure is the past 36 months.

|                                                                                                                                  | Name all entities with whom you have this relationship or indicate none (add rows as needed)                                                                                      | Specifications/Comments (e.g., if payments were made to you or to your institution)                                                                                                                                                                                                                                                                                                                                                                                                                                                                                                                                                                                                                                                                                                                                          |                                                                                                                                  |                                                                                                                                                                                   |  |                                                                                                     |  |                                               |  |                                                                 |
|----------------------------------------------------------------------------------------------------------------------------------|-----------------------------------------------------------------------------------------------------------------------------------------------------------------------------------|------------------------------------------------------------------------------------------------------------------------------------------------------------------------------------------------------------------------------------------------------------------------------------------------------------------------------------------------------------------------------------------------------------------------------------------------------------------------------------------------------------------------------------------------------------------------------------------------------------------------------------------------------------------------------------------------------------------------------------------------------------------------------------------------------------------------------|----------------------------------------------------------------------------------------------------------------------------------|-----------------------------------------------------------------------------------------------------------------------------------------------------------------------------------|--|-----------------------------------------------------------------------------------------------------|--|-----------------------------------------------|--|-----------------------------------------------------------------|
| Time frame: Since the initial planning of the work                                                                               |                                                                                                                                                                                   |                                                                                                                                                                                                                                                                                                                                                                                                                                                                                                                                                                                                                                                                                                                                                                                                                              |                                                                                                                                  |                                                                                                                                                                                   |  |                                                                                                     |  |                                               |  |                                                                 |
| <b>1</b>                                                                                                                         | All support for the present manuscript (e.g., funding, provision of study materials, medical writing, article processing charges, etc.)<br><b>No time limit for this item.</b>    | <input type="checkbox"/> <b>None</b><br><br><table border="1" style="width: 100%; border-collapse: collapse;"> <tr> <td style="width: 60%;">General funding started in 01.04.2020 and ended 31.05.2022<br/><b>German Federal Ministry of Health funded the clinical trial</b></td> <td style="width: 40%;"><b>German Federal Ministry of Health funded the clinical trial. Expense reimbursement for patient treatment paid by the sponsor DRK Blutspendedienst Baden-Württemberg Hesser</b></td> </tr> <tr> <td></td> <td>up to 630 € per enrolled donor including first plasmapheresis, 420 € per subsequent plasma donation</td> </tr> <tr> <td></td> <td>up to 310 € per donor in the follow up period</td> </tr> <tr> <td></td> <td>All paid to participating institution [not to the investigator]</td> </tr> </table> | General funding started in 01.04.2020 and ended 31.05.2022<br><b>German Federal Ministry of Health funded the clinical trial</b> | <b>German Federal Ministry of Health funded the clinical trial. Expense reimbursement for patient treatment paid by the sponsor DRK Blutspendedienst Baden-Württemberg Hesser</b> |  | up to 630 € per enrolled donor including first plasmapheresis, 420 € per subsequent plasma donation |  | up to 310 € per donor in the follow up period |  | All paid to participating institution [not to the investigator] |
| General funding started in 01.04.2020 and ended 31.05.2022<br><b>German Federal Ministry of Health funded the clinical trial</b> | <b>German Federal Ministry of Health funded the clinical trial. Expense reimbursement for patient treatment paid by the sponsor DRK Blutspendedienst Baden-Württemberg Hesser</b> |                                                                                                                                                                                                                                                                                                                                                                                                                                                                                                                                                                                                                                                                                                                                                                                                                              |                                                                                                                                  |                                                                                                                                                                                   |  |                                                                                                     |  |                                               |  |                                                                 |
|                                                                                                                                  | up to 630 € per enrolled donor including first plasmapheresis, 420 € per subsequent plasma donation                                                                               |                                                                                                                                                                                                                                                                                                                                                                                                                                                                                                                                                                                                                                                                                                                                                                                                                              |                                                                                                                                  |                                                                                                                                                                                   |  |                                                                                                     |  |                                               |  |                                                                 |
|                                                                                                                                  | up to 310 € per donor in the follow up period                                                                                                                                     |                                                                                                                                                                                                                                                                                                                                                                                                                                                                                                                                                                                                                                                                                                                                                                                                                              |                                                                                                                                  |                                                                                                                                                                                   |  |                                                                                                     |  |                                               |  |                                                                 |
|                                                                                                                                  | All paid to participating institution [not to the investigator]                                                                                                                   |                                                                                                                                                                                                                                                                                                                                                                                                                                                                                                                                                                                                                                                                                                                                                                                                                              |                                                                                                                                  |                                                                                                                                                                                   |  |                                                                                                     |  |                                               |  |                                                                 |
| Time frame: past 36 months                                                                                                       |                                                                                                                                                                                   |                                                                                                                                                                                                                                                                                                                                                                                                                                                                                                                                                                                                                                                                                                                                                                                                                              |                                                                                                                                  |                                                                                                                                                                                   |  |                                                                                                     |  |                                               |  |                                                                 |
| <b>2</b>                                                                                                                         | Grants or contracts from any entity (if not indicated in item #1 above).                                                                                                          | <input checked="" type="checkbox"/> <b>None</b><br><br><table border="1" style="width: 100%; border-collapse: collapse;"> <tr><td style="width: 60%; height: 20px;"></td><td style="width: 40%;"></td></tr> <tr><td style="height: 20px;"></td><td></td></tr> <tr><td style="height: 20px;"></td><td></td></tr> </table>                                                                                                                                                                                                                                                                                                                                                                                                                                                                                                     |                                                                                                                                  |                                                                                                                                                                                   |  |                                                                                                     |  |                                               |  |                                                                 |
|                                                                                                                                  |                                                                                                                                                                                   |                                                                                                                                                                                                                                                                                                                                                                                                                                                                                                                                                                                                                                                                                                                                                                                                                              |                                                                                                                                  |                                                                                                                                                                                   |  |                                                                                                     |  |                                               |  |                                                                 |
|                                                                                                                                  |                                                                                                                                                                                   |                                                                                                                                                                                                                                                                                                                                                                                                                                                                                                                                                                                                                                                                                                                                                                                                                              |                                                                                                                                  |                                                                                                                                                                                   |  |                                                                                                     |  |                                               |  |                                                                 |
|                                                                                                                                  |                                                                                                                                                                                   |                                                                                                                                                                                                                                                                                                                                                                                                                                                                                                                                                                                                                                                                                                                                                                                                                              |                                                                                                                                  |                                                                                                                                                                                   |  |                                                                                                     |  |                                               |  |                                                                 |

|          | Name all entities with whom you have this relationship or indicate none (add rows as needed)                 | Specifications/Comments (e.g., if payments were made to you or to your institution)                                                                                                                     |  |  |  |  |  |  |
|----------|--------------------------------------------------------------------------------------------------------------|---------------------------------------------------------------------------------------------------------------------------------------------------------------------------------------------------------|--|--|--|--|--|--|
| <b>3</b> | Royalties or licenses                                                                                        | <input checked="" type="checkbox"/> <b>None</b><br><table border="1" data-bbox="437 385 1522 488"> <tr><td> </td><td> </td></tr> <tr><td> </td><td> </td></tr> <tr><td> </td><td> </td></tr> </table>   |  |  |  |  |  |  |
|          |                                                                                                              |                                                                                                                                                                                                         |  |  |  |  |  |  |
|          |                                                                                                              |                                                                                                                                                                                                         |  |  |  |  |  |  |
|          |                                                                                                              |                                                                                                                                                                                                         |  |  |  |  |  |  |
| <b>4</b> | Consulting fees                                                                                              | <input checked="" type="checkbox"/> <b>None</b><br><table border="1" data-bbox="437 631 1522 734"> <tr><td> </td><td> </td></tr> <tr><td> </td><td> </td></tr> <tr><td> </td><td> </td></tr> </table>   |  |  |  |  |  |  |
|          |                                                                                                              |                                                                                                                                                                                                         |  |  |  |  |  |  |
|          |                                                                                                              |                                                                                                                                                                                                         |  |  |  |  |  |  |
|          |                                                                                                              |                                                                                                                                                                                                         |  |  |  |  |  |  |
| <b>5</b> | Payment or honoraria for lectures, presentations, speakers bureaus, manuscript writing or educational events | <input checked="" type="checkbox"/> <b>None</b><br><table border="1" data-bbox="437 855 1522 958"> <tr><td> </td><td> </td></tr> <tr><td> </td><td> </td></tr> <tr><td> </td><td> </td></tr> </table>   |  |  |  |  |  |  |
|          |                                                                                                              |                                                                                                                                                                                                         |  |  |  |  |  |  |
|          |                                                                                                              |                                                                                                                                                                                                         |  |  |  |  |  |  |
|          |                                                                                                              |                                                                                                                                                                                                         |  |  |  |  |  |  |
| <b>6</b> | Payment for expert testimony                                                                                 | <input checked="" type="checkbox"/> <b>None</b><br><table border="1" data-bbox="437 1263 1522 1366"> <tr><td> </td><td> </td></tr> <tr><td> </td><td> </td></tr> <tr><td> </td><td> </td></tr> </table> |  |  |  |  |  |  |
|          |                                                                                                              |                                                                                                                                                                                                         |  |  |  |  |  |  |
|          |                                                                                                              |                                                                                                                                                                                                         |  |  |  |  |  |  |
|          |                                                                                                              |                                                                                                                                                                                                         |  |  |  |  |  |  |
| <b>7</b> | Support for attending meetings and/or travel                                                                 | <input checked="" type="checkbox"/> <b>None</b><br><table border="1" data-bbox="437 1487 1522 1590"> <tr><td> </td><td> </td></tr> <tr><td> </td><td> </td></tr> <tr><td> </td><td> </td></tr> </table> |  |  |  |  |  |  |
|          |                                                                                                              |                                                                                                                                                                                                         |  |  |  |  |  |  |
|          |                                                                                                              |                                                                                                                                                                                                         |  |  |  |  |  |  |
|          |                                                                                                              |                                                                                                                                                                                                         |  |  |  |  |  |  |
| <b>8</b> | Patents planned, issued or pending                                                                           | <input checked="" type="checkbox"/> <b>None</b><br><table border="1" data-bbox="437 1711 1522 1814"> <tr><td> </td><td> </td></tr> <tr><td> </td><td> </td></tr> <tr><td> </td><td> </td></tr> </table> |  |  |  |  |  |  |
|          |                                                                                                              |                                                                                                                                                                                                         |  |  |  |  |  |  |
|          |                                                                                                              |                                                                                                                                                                                                         |  |  |  |  |  |  |
|          |                                                                                                              |                                                                                                                                                                                                         |  |  |  |  |  |  |
| <b>9</b> | Participation on a Data Safety Monitoring Board or Advisory Board                                            | <input checked="" type="checkbox"/> <b>None</b><br><table border="1" data-bbox="437 1935 1522 2038"> <tr><td> </td><td> </td></tr> <tr><td> </td><td> </td></tr> <tr><td> </td><td> </td></tr> </table> |  |  |  |  |  |  |
|          |                                                                                                              |                                                                                                                                                                                                         |  |  |  |  |  |  |
|          |                                                                                                              |                                                                                                                                                                                                         |  |  |  |  |  |  |
|          |                                                                                                              |                                                                                                                                                                                                         |  |  |  |  |  |  |

|    |                                                                                                   | Name all entities with whom you have this relationship or indicate none (add rows as needed) | Specifications/Comments (e.g., if payments were made to you or to your institution) |
|----|---------------------------------------------------------------------------------------------------|----------------------------------------------------------------------------------------------|-------------------------------------------------------------------------------------|
| 10 | Leadership or fiduciary role in other board, society, committee or advocacy group, paid or unpaid | <input checked="" type="checkbox"/> None                                                     |                                                                                     |
|    |                                                                                                   |                                                                                              |                                                                                     |
|    |                                                                                                   |                                                                                              |                                                                                     |
|    |                                                                                                   |                                                                                              |                                                                                     |
| 11 | Stock or stock options                                                                            | <input checked="" type="checkbox"/> None                                                     |                                                                                     |
|    |                                                                                                   |                                                                                              |                                                                                     |
|    |                                                                                                   |                                                                                              |                                                                                     |
|    |                                                                                                   |                                                                                              |                                                                                     |
| 12 | Receipt of equipment, materials, drugs, medical writing, gifts or other services                  | <input checked="" type="checkbox"/> None                                                     |                                                                                     |
|    |                                                                                                   |                                                                                              |                                                                                     |
|    |                                                                                                   |                                                                                              |                                                                                     |
|    |                                                                                                   |                                                                                              |                                                                                     |
| 13 | Other financial or non-financial interests                                                        | <input checked="" type="checkbox"/> None                                                     |                                                                                     |
|    |                                                                                                   |                                                                                              |                                                                                     |
|    |                                                                                                   |                                                                                              |                                                                                     |
|    |                                                                                                   |                                                                                              |                                                                                     |

Please place an "X" next to the following statement to indicate your agreement:

I certify that I have answered every question and have not altered the wording of any of the questions on this form.



## ICMJE DISCLOSURE FORM

**Date:** 9/15/2022

**Your Name:** Prof. Dr. Torsten Tonn

**Manuscript Title:** One-year follow-up of the CAPSID randomized trial for high-dose convalescent plasma in severe COVID-19 patients

**Manuscript Number (if known):** 163657-JCI-CMED-RV-2

In the interest of transparency, we ask you to disclose all relationships/activities/interests listed below that are related to the content of your manuscript. "Related" means any relation with for-profit or not-for-profit third parties whose interests may be affected by the content of the manuscript. Disclosure represents a commitment to transparency and does not necessarily indicate a bias. If you are in doubt about whether to list a relationship/activity/interest, it is preferable that you do so.

The author's relationships/activities/interests should be defined broadly. For example, if your manuscript pertains to the epidemiology of hypertension, you should declare all relationships with manufacturers of antihypertensive medication, even if that medication is not mentioned in the manuscript.

In item #1 below, report all support for the work reported in this manuscript without time limit. For all other items, the time frame for disclosure is the past 36 months.

|                                                                                                                                  | Name all entities with whom you have this relationship or indicate none (add rows as needed)                                                                                   | Specifications/Comments (e.g., if payments were made to you or to your institution)                                                                                                                                                                                                                                                                                                                                                                                                                                                                                                                                                                                                                                                                                                                           |                                                                                                                                  |                                                                                                                                                                           |  |                                                                                                     |  |                                               |  |                                                                 |
|----------------------------------------------------------------------------------------------------------------------------------|--------------------------------------------------------------------------------------------------------------------------------------------------------------------------------|---------------------------------------------------------------------------------------------------------------------------------------------------------------------------------------------------------------------------------------------------------------------------------------------------------------------------------------------------------------------------------------------------------------------------------------------------------------------------------------------------------------------------------------------------------------------------------------------------------------------------------------------------------------------------------------------------------------------------------------------------------------------------------------------------------------|----------------------------------------------------------------------------------------------------------------------------------|---------------------------------------------------------------------------------------------------------------------------------------------------------------------------|--|-----------------------------------------------------------------------------------------------------|--|-----------------------------------------------|--|-----------------------------------------------------------------|
| Time frame: Since the initial planning of the work                                                                               |                                                                                                                                                                                |                                                                                                                                                                                                                                                                                                                                                                                                                                                                                                                                                                                                                                                                                                                                                                                                               |                                                                                                                                  |                                                                                                                                                                           |  |                                                                                                     |  |                                               |  |                                                                 |
| <b>1</b>                                                                                                                         | All support for the present manuscript (e.g., funding, provision of study materials, medical writing, article processing charges, etc.)<br><b>No time limit for this item.</b> | <input type="checkbox"/> None<br><br><table border="1" style="width: 100%; border-collapse: collapse;"> <tr> <td style="width: 60%;">General funding started in 01.04.2020 and ended 31.05.2022<br/><b>German Federal Ministry of Health funded the clinical trial</b></td> <td style="width: 40%;">German Federal Ministry of Health funded the clinical trial. Expense reimbursement for patient treatment paid by the sponsor DRK Blutspendedienst Baden-Württemberg Hesse</td> </tr> <tr> <td></td> <td>up to 630 € per enrolled donor including first plasmapheresis, 420 € per subsequent plasma donation</td> </tr> <tr> <td></td> <td>up to 310 € per donor in the follow up period</td> </tr> <tr> <td></td> <td>All paid to participating institution [not to the investigator]</td> </tr> </table> | General funding started in 01.04.2020 and ended 31.05.2022<br><b>German Federal Ministry of Health funded the clinical trial</b> | German Federal Ministry of Health funded the clinical trial. Expense reimbursement for patient treatment paid by the sponsor DRK Blutspendedienst Baden-Württemberg Hesse |  | up to 630 € per enrolled donor including first plasmapheresis, 420 € per subsequent plasma donation |  | up to 310 € per donor in the follow up period |  | All paid to participating institution [not to the investigator] |
| General funding started in 01.04.2020 and ended 31.05.2022<br><b>German Federal Ministry of Health funded the clinical trial</b> | German Federal Ministry of Health funded the clinical trial. Expense reimbursement for patient treatment paid by the sponsor DRK Blutspendedienst Baden-Württemberg Hesse      |                                                                                                                                                                                                                                                                                                                                                                                                                                                                                                                                                                                                                                                                                                                                                                                                               |                                                                                                                                  |                                                                                                                                                                           |  |                                                                                                     |  |                                               |  |                                                                 |
|                                                                                                                                  | up to 630 € per enrolled donor including first plasmapheresis, 420 € per subsequent plasma donation                                                                            |                                                                                                                                                                                                                                                                                                                                                                                                                                                                                                                                                                                                                                                                                                                                                                                                               |                                                                                                                                  |                                                                                                                                                                           |  |                                                                                                     |  |                                               |  |                                                                 |
|                                                                                                                                  | up to 310 € per donor in the follow up period                                                                                                                                  |                                                                                                                                                                                                                                                                                                                                                                                                                                                                                                                                                                                                                                                                                                                                                                                                               |                                                                                                                                  |                                                                                                                                                                           |  |                                                                                                     |  |                                               |  |                                                                 |
|                                                                                                                                  | All paid to participating institution [not to the investigator]                                                                                                                |                                                                                                                                                                                                                                                                                                                                                                                                                                                                                                                                                                                                                                                                                                                                                                                                               |                                                                                                                                  |                                                                                                                                                                           |  |                                                                                                     |  |                                               |  |                                                                 |
| Time frame: past 36 months                                                                                                       |                                                                                                                                                                                |                                                                                                                                                                                                                                                                                                                                                                                                                                                                                                                                                                                                                                                                                                                                                                                                               |                                                                                                                                  |                                                                                                                                                                           |  |                                                                                                     |  |                                               |  |                                                                 |
| <b>2</b>                                                                                                                         | Grants or contracts from any entity (if not indicated in item #1 above).                                                                                                       | <input checked="" type="checkbox"/> None<br><br><table border="1" style="width: 100%; border-collapse: collapse;"> <tr><td style="width: 60%; height: 20px;"></td><td style="width: 40%;"></td></tr> <tr><td style="height: 20px;"></td><td></td></tr> <tr><td style="height: 20px;"></td><td></td></tr> </table>                                                                                                                                                                                                                                                                                                                                                                                                                                                                                             |                                                                                                                                  |                                                                                                                                                                           |  |                                                                                                     |  |                                               |  |                                                                 |
|                                                                                                                                  |                                                                                                                                                                                |                                                                                                                                                                                                                                                                                                                                                                                                                                                                                                                                                                                                                                                                                                                                                                                                               |                                                                                                                                  |                                                                                                                                                                           |  |                                                                                                     |  |                                               |  |                                                                 |
|                                                                                                                                  |                                                                                                                                                                                |                                                                                                                                                                                                                                                                                                                                                                                                                                                                                                                                                                                                                                                                                                                                                                                                               |                                                                                                                                  |                                                                                                                                                                           |  |                                                                                                     |  |                                               |  |                                                                 |
|                                                                                                                                  |                                                                                                                                                                                |                                                                                                                                                                                                                                                                                                                                                                                                                                                                                                                                                                                                                                                                                                                                                                                                               |                                                                                                                                  |                                                                                                                                                                           |  |                                                                                                     |  |                                               |  |                                                                 |

|          |                                                                                                              | Name all entities with whom you have this relationship or indicate none (add rows as needed) | Specifications/Comments (e.g., if payments were made to you or to your institution) |
|----------|--------------------------------------------------------------------------------------------------------------|----------------------------------------------------------------------------------------------|-------------------------------------------------------------------------------------|
| <b>3</b> | Royalties or licenses                                                                                        | <input checked="" type="checkbox"/> <b>None</b>                                              |                                                                                     |
|          |                                                                                                              |                                                                                              |                                                                                     |
|          |                                                                                                              |                                                                                              |                                                                                     |
|          |                                                                                                              |                                                                                              |                                                                                     |
| <b>4</b> | Consulting fees                                                                                              | <input checked="" type="checkbox"/> <b>None</b>                                              |                                                                                     |
|          |                                                                                                              |                                                                                              |                                                                                     |
|          |                                                                                                              |                                                                                              |                                                                                     |
|          |                                                                                                              |                                                                                              |                                                                                     |
| <b>5</b> | Payment or honoraria for lectures, presentations, speakers bureaus, manuscript writing or educational events | <input checked="" type="checkbox"/> <b>None</b>                                              |                                                                                     |
|          |                                                                                                              |                                                                                              |                                                                                     |
|          |                                                                                                              |                                                                                              |                                                                                     |
|          |                                                                                                              |                                                                                              |                                                                                     |
| <b>6</b> | Payment for expert testimony                                                                                 | <input checked="" type="checkbox"/> <b>None</b>                                              |                                                                                     |
|          |                                                                                                              |                                                                                              |                                                                                     |
|          |                                                                                                              |                                                                                              |                                                                                     |
|          |                                                                                                              |                                                                                              |                                                                                     |
| <b>7</b> | Support for attending meetings and/or travel                                                                 | <input checked="" type="checkbox"/> <b>None</b>                                              |                                                                                     |
|          |                                                                                                              |                                                                                              |                                                                                     |
|          |                                                                                                              |                                                                                              |                                                                                     |
|          |                                                                                                              |                                                                                              |                                                                                     |
| <b>8</b> | Patents planned, issued or pending                                                                           | <input checked="" type="checkbox"/> <b>None</b>                                              |                                                                                     |
|          |                                                                                                              |                                                                                              |                                                                                     |
|          |                                                                                                              |                                                                                              |                                                                                     |
|          |                                                                                                              |                                                                                              |                                                                                     |
| <b>9</b> | Participation on a Data Safety Monitoring Board or Advisory Board                                            | <input checked="" type="checkbox"/> <b>None</b>                                              |                                                                                     |
|          |                                                                                                              |                                                                                              |                                                                                     |
|          |                                                                                                              |                                                                                              |                                                                                     |
|          |                                                                                                              |                                                                                              |                                                                                     |

|    |                                                                                                   | Name all entities with whom you have this relationship or indicate none (add rows as needed) | Specifications/Comments (e.g., if payments were made to you or to your institution) |
|----|---------------------------------------------------------------------------------------------------|----------------------------------------------------------------------------------------------|-------------------------------------------------------------------------------------|
| 10 | Leadership or fiduciary role in other board, society, committee or advocacy group, paid or unpaid | <input checked="" type="checkbox"/> None                                                     |                                                                                     |
|    |                                                                                                   |                                                                                              |                                                                                     |
|    |                                                                                                   |                                                                                              |                                                                                     |
|    |                                                                                                   |                                                                                              |                                                                                     |
| 11 | Stock or stock options                                                                            | <input checked="" type="checkbox"/> None                                                     |                                                                                     |
|    |                                                                                                   |                                                                                              |                                                                                     |
|    |                                                                                                   |                                                                                              |                                                                                     |
|    |                                                                                                   |                                                                                              |                                                                                     |
| 12 | Receipt of equipment, materials, drugs, medical writing, gifts or other services                  | <input checked="" type="checkbox"/> None                                                     |                                                                                     |
|    |                                                                                                   |                                                                                              |                                                                                     |
|    |                                                                                                   |                                                                                              |                                                                                     |
|    |                                                                                                   |                                                                                              |                                                                                     |
| 13 | Other financial or non-financial interests                                                        | <input checked="" type="checkbox"/> None                                                     |                                                                                     |
|    |                                                                                                   |                                                                                              |                                                                                     |
|    |                                                                                                   |                                                                                              |                                                                                     |
|    |                                                                                                   |                                                                                              |                                                                                     |

Please place an "X" next to the following statement to indicate your agreement:

I certify that I have answered every question and have not altered the wording of any of the questions on this form.

## ICMJE DISCLOSURE FORM

**Date:** 9/15/2022

**Your Name:** Dr. Rebecca Müller

**Manuscript Title:** One-year follow-up of the CAPSID randomized trial for high-dose convalescent plasma in severe COVID-19 patients

**Manuscript Number (if known):** 163657-JCI-CMED-RV-2

In the interest of transparency, we ask you to disclose all relationships/activities/interests listed below that are related to the content of your manuscript. "Related" means any relation with for-profit or not-for-profit third parties whose interests may be affected by the content of the manuscript. Disclosure represents a commitment to transparency and does not necessarily indicate a bias. If you are in doubt about whether to list a relationship/activity/interest, it is preferable that you do so.

The author's relationships/activities/interests should be defined broadly. For example, if your manuscript pertains to the epidemiology of hypertension, you should declare all relationships with manufacturers of antihypertensive medication, even if that medication is not mentioned in the manuscript.

In item #1 below, report all support for the work reported in this manuscript without time limit. For all other items, the time frame for disclosure is the past 36 months.

|                                                                                                                                  | Name all entities with whom you have this relationship or indicate none (add rows as needed)                                                                                      | Specifications/Comments (e.g., if payments were made to you or to your institution)                                                                                                                                                                                                                                                                                                                                                                                                                                                                                                                                                                                                                                                                                                                                   |                                                                                                                                  |                                                                                                                                                                                   |  |                                                                                                     |  |                                               |  |                                                                 |
|----------------------------------------------------------------------------------------------------------------------------------|-----------------------------------------------------------------------------------------------------------------------------------------------------------------------------------|-----------------------------------------------------------------------------------------------------------------------------------------------------------------------------------------------------------------------------------------------------------------------------------------------------------------------------------------------------------------------------------------------------------------------------------------------------------------------------------------------------------------------------------------------------------------------------------------------------------------------------------------------------------------------------------------------------------------------------------------------------------------------------------------------------------------------|----------------------------------------------------------------------------------------------------------------------------------|-----------------------------------------------------------------------------------------------------------------------------------------------------------------------------------|--|-----------------------------------------------------------------------------------------------------|--|-----------------------------------------------|--|-----------------------------------------------------------------|
| Time frame: Since the initial planning of the work                                                                               |                                                                                                                                                                                   |                                                                                                                                                                                                                                                                                                                                                                                                                                                                                                                                                                                                                                                                                                                                                                                                                       |                                                                                                                                  |                                                                                                                                                                                   |  |                                                                                                     |  |                                               |  |                                                                 |
| <b>1</b>                                                                                                                         | All support for the present manuscript (e.g., funding, provision of study materials, medical writing, article processing charges, etc.)<br><b>No time limit for this item.</b>    | <input type="checkbox"/> None<br><br><table border="1" style="width: 100%; border-collapse: collapse;"> <tr> <td style="width: 60%;">General funding started in 01.04.2020 and ended 31.05.2022<br/><b>German Federal Ministry of Health funded the clinical trial</b></td> <td style="width: 40%;"><b>German Federal Ministry of Health funded the clinical trial. Expense reimbursement for patient treatment paid by the sponsor DRK Blutspendedienst Baden-Württemberg Hessen</b></td> </tr> <tr> <td></td> <td>up to 630 € per enrolled donor including first plasmapheresis, 420 € per subsequent plasma donation</td> </tr> <tr> <td></td> <td>up to 310 € per donor in the follow up period</td> </tr> <tr> <td></td> <td>All paid to participating institution [not to the investigator]</td> </tr> </table> | General funding started in 01.04.2020 and ended 31.05.2022<br><b>German Federal Ministry of Health funded the clinical trial</b> | <b>German Federal Ministry of Health funded the clinical trial. Expense reimbursement for patient treatment paid by the sponsor DRK Blutspendedienst Baden-Württemberg Hessen</b> |  | up to 630 € per enrolled donor including first plasmapheresis, 420 € per subsequent plasma donation |  | up to 310 € per donor in the follow up period |  | All paid to participating institution [not to the investigator] |
| General funding started in 01.04.2020 and ended 31.05.2022<br><b>German Federal Ministry of Health funded the clinical trial</b> | <b>German Federal Ministry of Health funded the clinical trial. Expense reimbursement for patient treatment paid by the sponsor DRK Blutspendedienst Baden-Württemberg Hessen</b> |                                                                                                                                                                                                                                                                                                                                                                                                                                                                                                                                                                                                                                                                                                                                                                                                                       |                                                                                                                                  |                                                                                                                                                                                   |  |                                                                                                     |  |                                               |  |                                                                 |
|                                                                                                                                  | up to 630 € per enrolled donor including first plasmapheresis, 420 € per subsequent plasma donation                                                                               |                                                                                                                                                                                                                                                                                                                                                                                                                                                                                                                                                                                                                                                                                                                                                                                                                       |                                                                                                                                  |                                                                                                                                                                                   |  |                                                                                                     |  |                                               |  |                                                                 |
|                                                                                                                                  | up to 310 € per donor in the follow up period                                                                                                                                     |                                                                                                                                                                                                                                                                                                                                                                                                                                                                                                                                                                                                                                                                                                                                                                                                                       |                                                                                                                                  |                                                                                                                                                                                   |  |                                                                                                     |  |                                               |  |                                                                 |
|                                                                                                                                  | All paid to participating institution [not to the investigator]                                                                                                                   |                                                                                                                                                                                                                                                                                                                                                                                                                                                                                                                                                                                                                                                                                                                                                                                                                       |                                                                                                                                  |                                                                                                                                                                                   |  |                                                                                                     |  |                                               |  |                                                                 |
| Time frame: past 36 months                                                                                                       |                                                                                                                                                                                   |                                                                                                                                                                                                                                                                                                                                                                                                                                                                                                                                                                                                                                                                                                                                                                                                                       |                                                                                                                                  |                                                                                                                                                                                   |  |                                                                                                     |  |                                               |  |                                                                 |
| <b>2</b>                                                                                                                         | Grants or contracts from any entity (if not indicated in item #1 above).                                                                                                          | <input checked="" type="checkbox"/> None<br><br><table border="1" style="width: 100%; border-collapse: collapse;"> <tr><td style="width: 60%; height: 20px;"></td><td style="width: 40%;"></td></tr> <tr><td style="height: 20px;"></td><td></td></tr> <tr><td style="height: 20px;"></td><td></td></tr> </table>                                                                                                                                                                                                                                                                                                                                                                                                                                                                                                     |                                                                                                                                  |                                                                                                                                                                                   |  |                                                                                                     |  |                                               |  |                                                                 |
|                                                                                                                                  |                                                                                                                                                                                   |                                                                                                                                                                                                                                                                                                                                                                                                                                                                                                                                                                                                                                                                                                                                                                                                                       |                                                                                                                                  |                                                                                                                                                                                   |  |                                                                                                     |  |                                               |  |                                                                 |
|                                                                                                                                  |                                                                                                                                                                                   |                                                                                                                                                                                                                                                                                                                                                                                                                                                                                                                                                                                                                                                                                                                                                                                                                       |                                                                                                                                  |                                                                                                                                                                                   |  |                                                                                                     |  |                                               |  |                                                                 |
|                                                                                                                                  |                                                                                                                                                                                   |                                                                                                                                                                                                                                                                                                                                                                                                                                                                                                                                                                                                                                                                                                                                                                                                                       |                                                                                                                                  |                                                                                                                                                                                   |  |                                                                                                     |  |                                               |  |                                                                 |

|          | Name all entities with whom you have this relationship or indicate none (add rows as needed)                 | Specifications/Comments (e.g., if payments were made to you or to your institution)                                                                                                                     |  |  |  |  |  |  |
|----------|--------------------------------------------------------------------------------------------------------------|---------------------------------------------------------------------------------------------------------------------------------------------------------------------------------------------------------|--|--|--|--|--|--|
| <b>3</b> | Royalties or licenses                                                                                        | <input checked="" type="checkbox"/> <b>None</b><br><table border="1" data-bbox="437 383 1541 488"> <tr><td> </td><td> </td></tr> <tr><td> </td><td> </td></tr> <tr><td> </td><td> </td></tr> </table>   |  |  |  |  |  |  |
|          |                                                                                                              |                                                                                                                                                                                                         |  |  |  |  |  |  |
|          |                                                                                                              |                                                                                                                                                                                                         |  |  |  |  |  |  |
|          |                                                                                                              |                                                                                                                                                                                                         |  |  |  |  |  |  |
| <b>4</b> | Consulting fees                                                                                              | <input checked="" type="checkbox"/> <b>None</b><br><table border="1" data-bbox="437 629 1541 734"> <tr><td> </td><td> </td></tr> <tr><td> </td><td> </td></tr> <tr><td> </td><td> </td></tr> </table>   |  |  |  |  |  |  |
|          |                                                                                                              |                                                                                                                                                                                                         |  |  |  |  |  |  |
|          |                                                                                                              |                                                                                                                                                                                                         |  |  |  |  |  |  |
|          |                                                                                                              |                                                                                                                                                                                                         |  |  |  |  |  |  |
| <b>5</b> | Payment or honoraria for lectures, presentations, speakers bureaus, manuscript writing or educational events | <input checked="" type="checkbox"/> <b>None</b><br><table border="1" data-bbox="437 853 1541 958"> <tr><td> </td><td> </td></tr> <tr><td> </td><td> </td></tr> <tr><td> </td><td> </td></tr> </table>   |  |  |  |  |  |  |
|          |                                                                                                              |                                                                                                                                                                                                         |  |  |  |  |  |  |
|          |                                                                                                              |                                                                                                                                                                                                         |  |  |  |  |  |  |
|          |                                                                                                              |                                                                                                                                                                                                         |  |  |  |  |  |  |
| <b>6</b> | Payment for expert testimony                                                                                 | <input checked="" type="checkbox"/> <b>None</b><br><table border="1" data-bbox="437 1261 1541 1366"> <tr><td> </td><td> </td></tr> <tr><td> </td><td> </td></tr> <tr><td> </td><td> </td></tr> </table> |  |  |  |  |  |  |
|          |                                                                                                              |                                                                                                                                                                                                         |  |  |  |  |  |  |
|          |                                                                                                              |                                                                                                                                                                                                         |  |  |  |  |  |  |
|          |                                                                                                              |                                                                                                                                                                                                         |  |  |  |  |  |  |
| <b>7</b> | Support for attending meetings and/or travel                                                                 | <input checked="" type="checkbox"/> <b>None</b><br><table border="1" data-bbox="437 1485 1541 1590"> <tr><td> </td><td> </td></tr> <tr><td> </td><td> </td></tr> <tr><td> </td><td> </td></tr> </table> |  |  |  |  |  |  |
|          |                                                                                                              |                                                                                                                                                                                                         |  |  |  |  |  |  |
|          |                                                                                                              |                                                                                                                                                                                                         |  |  |  |  |  |  |
|          |                                                                                                              |                                                                                                                                                                                                         |  |  |  |  |  |  |
| <b>8</b> | Patents planned, issued or pending                                                                           | <input checked="" type="checkbox"/> <b>None</b><br><table border="1" data-bbox="437 1709 1541 1814"> <tr><td> </td><td> </td></tr> <tr><td> </td><td> </td></tr> <tr><td> </td><td> </td></tr> </table> |  |  |  |  |  |  |
|          |                                                                                                              |                                                                                                                                                                                                         |  |  |  |  |  |  |
|          |                                                                                                              |                                                                                                                                                                                                         |  |  |  |  |  |  |
|          |                                                                                                              |                                                                                                                                                                                                         |  |  |  |  |  |  |
| <b>9</b> | Participation on a Data Safety Monitoring Board or Advisory Board                                            | <input checked="" type="checkbox"/> <b>None</b><br><table border="1" data-bbox="437 1933 1541 2038"> <tr><td> </td><td> </td></tr> <tr><td> </td><td> </td></tr> <tr><td> </td><td> </td></tr> </table> |  |  |  |  |  |  |
|          |                                                                                                              |                                                                                                                                                                                                         |  |  |  |  |  |  |
|          |                                                                                                              |                                                                                                                                                                                                         |  |  |  |  |  |  |
|          |                                                                                                              |                                                                                                                                                                                                         |  |  |  |  |  |  |

|    |                                                                                                   | Name all entities with whom you have this relationship or indicate none (add rows as needed) | Specifications/Comments (e.g., if payments were made to you or to your institution) |
|----|---------------------------------------------------------------------------------------------------|----------------------------------------------------------------------------------------------|-------------------------------------------------------------------------------------|
| 10 | Leadership or fiduciary role in other board, society, committee or advocacy group, paid or unpaid | <input checked="" type="checkbox"/> None                                                     |                                                                                     |
|    |                                                                                                   |                                                                                              |                                                                                     |
|    |                                                                                                   |                                                                                              |                                                                                     |
|    |                                                                                                   |                                                                                              |                                                                                     |
| 11 | Stock or stock options                                                                            | <input checked="" type="checkbox"/> None                                                     |                                                                                     |
|    |                                                                                                   |                                                                                              |                                                                                     |
|    |                                                                                                   |                                                                                              |                                                                                     |
|    |                                                                                                   |                                                                                              |                                                                                     |
| 12 | Receipt of equipment, materials, drugs, medical writing, gifts or other services                  | <input checked="" type="checkbox"/> None                                                     |                                                                                     |
|    |                                                                                                   |                                                                                              |                                                                                     |
|    |                                                                                                   |                                                                                              |                                                                                     |
|    |                                                                                                   |                                                                                              |                                                                                     |
| 13 | Other financial or non-financial interests                                                        | <input checked="" type="checkbox"/> None                                                     |                                                                                     |
|    |                                                                                                   |                                                                                              |                                                                                     |
|    |                                                                                                   |                                                                                              |                                                                                     |
|    |                                                                                                   |                                                                                              |                                                                                     |

Please place an "X" next to the following statement to indicate your agreement:

I certify that I have answered every question and have not altered the wording of any of the questions on this form.

## ICMJE DISCLOSURE FORM

**Date:** 9/15/2022

**Your Name:** Dr. Thomas Burkhardt

**Manuscript Title:** One-year follow-up of the CAPSID randomized trial for high-dose convalescent plasma in severe COVID-19 patients

**Manuscript Number (if known):** 163657-JCI-CMED-RV-2

In the interest of transparency, we ask you to disclose all relationships/activities/interests listed below that are related to the content of your manuscript. "Related" means any relation with for-profit or not-for-profit third parties whose interests may be affected by the content of the manuscript. Disclosure represents a commitment to transparency and does not necessarily indicate a bias. If you are in doubt about whether to list a relationship/activity/interest, it is preferable that you do so.

The author's relationships/activities/interests should be defined broadly. For example, if your manuscript pertains to the epidemiology of hypertension, you should declare all relationships with manufacturers of antihypertensive medication, even if that medication is not mentioned in the manuscript.

In item #1 below, report all support for the work reported in this manuscript without time limit. For all other items, the time frame for disclosure is the past 36 months.

|                                                                                                                                  | Name all entities with whom you have this relationship or indicate none (add rows as needed)                                                                                      | Specifications/Comments (e.g., if payments were made to you or to your institution)                                                                                                                                                                                                                                                                                                                                                                                                                                                                                                                                                                                                                                                                                                                                          |                                                                                                                                  |                                                                                                                                                                                   |  |                                                                                                     |  |                                               |  |                                                                 |
|----------------------------------------------------------------------------------------------------------------------------------|-----------------------------------------------------------------------------------------------------------------------------------------------------------------------------------|------------------------------------------------------------------------------------------------------------------------------------------------------------------------------------------------------------------------------------------------------------------------------------------------------------------------------------------------------------------------------------------------------------------------------------------------------------------------------------------------------------------------------------------------------------------------------------------------------------------------------------------------------------------------------------------------------------------------------------------------------------------------------------------------------------------------------|----------------------------------------------------------------------------------------------------------------------------------|-----------------------------------------------------------------------------------------------------------------------------------------------------------------------------------|--|-----------------------------------------------------------------------------------------------------|--|-----------------------------------------------|--|-----------------------------------------------------------------|
| Time frame: Since the initial planning of the work                                                                               |                                                                                                                                                                                   |                                                                                                                                                                                                                                                                                                                                                                                                                                                                                                                                                                                                                                                                                                                                                                                                                              |                                                                                                                                  |                                                                                                                                                                                   |  |                                                                                                     |  |                                               |  |                                                                 |
| <b>1</b>                                                                                                                         | All support for the present manuscript (e.g., funding, provision of study materials, medical writing, article processing charges, etc.)<br><b>No time limit for this item.</b>    | <input type="checkbox"/> <b>None</b><br><br><table border="1" style="width: 100%; border-collapse: collapse;"> <tr> <td style="width: 60%;">General funding started in 01.04.2020 and ended 31.05.2022<br/><b>German Federal Ministry of Health funded the clinical trial</b></td> <td style="width: 40%;"><b>German Federal Ministry of Health funded the clinical trial. Expense reimbursement for patient treatment paid by the sponsor DRK Blutspendedienst Baden-Württemberg Hessen</b></td> </tr> <tr> <td></td> <td>up to 630 € per enrolled donor including first plasmapheresis, 420 € per subsequent plasma donation</td> </tr> <tr> <td></td> <td>up to 310 € per donor in the follow up period</td> </tr> <tr> <td></td> <td>All paid to participating institution [not to the investigator]</td> </tr> </table> | General funding started in 01.04.2020 and ended 31.05.2022<br><b>German Federal Ministry of Health funded the clinical trial</b> | <b>German Federal Ministry of Health funded the clinical trial. Expense reimbursement for patient treatment paid by the sponsor DRK Blutspendedienst Baden-Württemberg Hessen</b> |  | up to 630 € per enrolled donor including first plasmapheresis, 420 € per subsequent plasma donation |  | up to 310 € per donor in the follow up period |  | All paid to participating institution [not to the investigator] |
| General funding started in 01.04.2020 and ended 31.05.2022<br><b>German Federal Ministry of Health funded the clinical trial</b> | <b>German Federal Ministry of Health funded the clinical trial. Expense reimbursement for patient treatment paid by the sponsor DRK Blutspendedienst Baden-Württemberg Hessen</b> |                                                                                                                                                                                                                                                                                                                                                                                                                                                                                                                                                                                                                                                                                                                                                                                                                              |                                                                                                                                  |                                                                                                                                                                                   |  |                                                                                                     |  |                                               |  |                                                                 |
|                                                                                                                                  | up to 630 € per enrolled donor including first plasmapheresis, 420 € per subsequent plasma donation                                                                               |                                                                                                                                                                                                                                                                                                                                                                                                                                                                                                                                                                                                                                                                                                                                                                                                                              |                                                                                                                                  |                                                                                                                                                                                   |  |                                                                                                     |  |                                               |  |                                                                 |
|                                                                                                                                  | up to 310 € per donor in the follow up period                                                                                                                                     |                                                                                                                                                                                                                                                                                                                                                                                                                                                                                                                                                                                                                                                                                                                                                                                                                              |                                                                                                                                  |                                                                                                                                                                                   |  |                                                                                                     |  |                                               |  |                                                                 |
|                                                                                                                                  | All paid to participating institution [not to the investigator]                                                                                                                   |                                                                                                                                                                                                                                                                                                                                                                                                                                                                                                                                                                                                                                                                                                                                                                                                                              |                                                                                                                                  |                                                                                                                                                                                   |  |                                                                                                     |  |                                               |  |                                                                 |
| Time frame: past 36 months                                                                                                       |                                                                                                                                                                                   |                                                                                                                                                                                                                                                                                                                                                                                                                                                                                                                                                                                                                                                                                                                                                                                                                              |                                                                                                                                  |                                                                                                                                                                                   |  |                                                                                                     |  |                                               |  |                                                                 |
| <b>2</b>                                                                                                                         | Grants or contracts from any entity (if not indicated in item #1 above).                                                                                                          | <input checked="" type="checkbox"/> <b>None</b><br><br><table border="1" style="width: 100%; border-collapse: collapse;"> <tr><td style="height: 20px;"> </td><td> </td></tr> <tr><td style="height: 20px;"> </td><td> </td></tr> <tr><td style="height: 20px;"> </td><td> </td></tr> </table>                                                                                                                                                                                                                                                                                                                                                                                                                                                                                                                               |                                                                                                                                  |                                                                                                                                                                                   |  |                                                                                                     |  |                                               |  |                                                                 |
|                                                                                                                                  |                                                                                                                                                                                   |                                                                                                                                                                                                                                                                                                                                                                                                                                                                                                                                                                                                                                                                                                                                                                                                                              |                                                                                                                                  |                                                                                                                                                                                   |  |                                                                                                     |  |                                               |  |                                                                 |
|                                                                                                                                  |                                                                                                                                                                                   |                                                                                                                                                                                                                                                                                                                                                                                                                                                                                                                                                                                                                                                                                                                                                                                                                              |                                                                                                                                  |                                                                                                                                                                                   |  |                                                                                                     |  |                                               |  |                                                                 |
|                                                                                                                                  |                                                                                                                                                                                   |                                                                                                                                                                                                                                                                                                                                                                                                                                                                                                                                                                                                                                                                                                                                                                                                                              |                                                                                                                                  |                                                                                                                                                                                   |  |                                                                                                     |  |                                               |  |                                                                 |

|   | Name all entities with whom you have this relationship or indicate none (add rows as needed)                 | Specifications/Comments (e.g., if payments were made to you or to your institution)                                                                                                               |  |  |  |  |  |  |
|---|--------------------------------------------------------------------------------------------------------------|---------------------------------------------------------------------------------------------------------------------------------------------------------------------------------------------------|--|--|--|--|--|--|
| 3 | Royalties or licenses                                                                                        | <input checked="" type="checkbox"/> <b>None</b><br><table border="1" data-bbox="437 385 1541 488"> <tr><td></td><td></td></tr> <tr><td></td><td></td></tr> <tr><td></td><td></td></tr> </table>   |  |  |  |  |  |  |
|   |                                                                                                              |                                                                                                                                                                                                   |  |  |  |  |  |  |
|   |                                                                                                              |                                                                                                                                                                                                   |  |  |  |  |  |  |
|   |                                                                                                              |                                                                                                                                                                                                   |  |  |  |  |  |  |
| 4 | Consulting fees                                                                                              | <input checked="" type="checkbox"/> <b>None</b><br><table border="1" data-bbox="437 631 1541 734"> <tr><td></td><td></td></tr> <tr><td></td><td></td></tr> <tr><td></td><td></td></tr> </table>   |  |  |  |  |  |  |
|   |                                                                                                              |                                                                                                                                                                                                   |  |  |  |  |  |  |
|   |                                                                                                              |                                                                                                                                                                                                   |  |  |  |  |  |  |
|   |                                                                                                              |                                                                                                                                                                                                   |  |  |  |  |  |  |
| 5 | Payment or honoraria for lectures, presentations, speakers bureaus, manuscript writing or educational events | <input checked="" type="checkbox"/> <b>None</b><br><table border="1" data-bbox="437 855 1541 958"> <tr><td></td><td></td></tr> <tr><td></td><td></td></tr> <tr><td></td><td></td></tr> </table>   |  |  |  |  |  |  |
|   |                                                                                                              |                                                                                                                                                                                                   |  |  |  |  |  |  |
|   |                                                                                                              |                                                                                                                                                                                                   |  |  |  |  |  |  |
|   |                                                                                                              |                                                                                                                                                                                                   |  |  |  |  |  |  |
| 6 | Payment for expert testimony                                                                                 | <input checked="" type="checkbox"/> <b>None</b><br><table border="1" data-bbox="437 1258 1541 1361"> <tr><td></td><td></td></tr> <tr><td></td><td></td></tr> <tr><td></td><td></td></tr> </table> |  |  |  |  |  |  |
|   |                                                                                                              |                                                                                                                                                                                                   |  |  |  |  |  |  |
|   |                                                                                                              |                                                                                                                                                                                                   |  |  |  |  |  |  |
|   |                                                                                                              |                                                                                                                                                                                                   |  |  |  |  |  |  |
| 7 | Support for attending meetings and/or travel                                                                 | <input checked="" type="checkbox"/> <b>None</b><br><table border="1" data-bbox="437 1482 1541 1585"> <tr><td></td><td></td></tr> <tr><td></td><td></td></tr> <tr><td></td><td></td></tr> </table> |  |  |  |  |  |  |
|   |                                                                                                              |                                                                                                                                                                                                   |  |  |  |  |  |  |
|   |                                                                                                              |                                                                                                                                                                                                   |  |  |  |  |  |  |
|   |                                                                                                              |                                                                                                                                                                                                   |  |  |  |  |  |  |
| 8 | Patents planned, issued or pending                                                                           | <input checked="" type="checkbox"/> <b>None</b><br><table border="1" data-bbox="437 1706 1541 1809"> <tr><td></td><td></td></tr> <tr><td></td><td></td></tr> <tr><td></td><td></td></tr> </table> |  |  |  |  |  |  |
|   |                                                                                                              |                                                                                                                                                                                                   |  |  |  |  |  |  |
|   |                                                                                                              |                                                                                                                                                                                                   |  |  |  |  |  |  |
|   |                                                                                                              |                                                                                                                                                                                                   |  |  |  |  |  |  |
| 9 | Participation on a Data Safety Monitoring Board or Advisory Board                                            | <input checked="" type="checkbox"/> <b>None</b><br><table border="1" data-bbox="437 1930 1541 2033"> <tr><td></td><td></td></tr> <tr><td></td><td></td></tr> <tr><td></td><td></td></tr> </table> |  |  |  |  |  |  |
|   |                                                                                                              |                                                                                                                                                                                                   |  |  |  |  |  |  |
|   |                                                                                                              |                                                                                                                                                                                                   |  |  |  |  |  |  |
|   |                                                                                                              |                                                                                                                                                                                                   |  |  |  |  |  |  |



|    |                                                                                                   | Name all entities with whom you have this relationship or indicate none (add rows as needed) | Specifications/Comments (e.g., if payments were made to you or to your institution) |
|----|---------------------------------------------------------------------------------------------------|----------------------------------------------------------------------------------------------|-------------------------------------------------------------------------------------|
| 10 | Leadership or fiduciary role in other board, society, committee or advocacy group, paid or unpaid | <input checked="" type="checkbox"/> None                                                     |                                                                                     |
|    |                                                                                                   |                                                                                              |                                                                                     |
|    |                                                                                                   |                                                                                              |                                                                                     |
|    |                                                                                                   |                                                                                              |                                                                                     |
| 11 | Stock or stock options                                                                            | <input checked="" type="checkbox"/> None                                                     |                                                                                     |
|    |                                                                                                   |                                                                                              |                                                                                     |
|    |                                                                                                   |                                                                                              |                                                                                     |
|    |                                                                                                   |                                                                                              |                                                                                     |
| 12 | Receipt of equipment, materials, drugs, medical writing, gifts or other services                  | <input checked="" type="checkbox"/> None                                                     |                                                                                     |
|    |                                                                                                   |                                                                                              |                                                                                     |
|    |                                                                                                   |                                                                                              |                                                                                     |
|    |                                                                                                   |                                                                                              |                                                                                     |
| 13 | Other financial or non-financial interests                                                        | <input checked="" type="checkbox"/> None                                                     |                                                                                     |
|    |                                                                                                   |                                                                                              |                                                                                     |
|    |                                                                                                   |                                                                                              |                                                                                     |
|    |                                                                                                   |                                                                                              |                                                                                     |

Please place an "X" next to the following statement to indicate your agreement:

I certify that I have answered every question and have not altered the wording of any of the questions on this form.

## ICMJE DISCLOSURE FORM

**Date:** 9/15/2022

**Your Name:** Prof. Dr. Tamam Bakchoul

**Manuscript Title:** One-year follow-up of the CAPSID randomized trial for high-dose convalescent plasma in severe COVID-19 patients

**Manuscript Number (if known):** 163657-JCI-CMED-RV-2

In the interest of transparency, we ask you to disclose all relationships/activities/interests listed below that are related to the content of your manuscript. "Related" means any relation with for-profit or not-for-profit third parties whose interests may be affected by the content of the manuscript. Disclosure represents a commitment to transparency and does not necessarily indicate a bias. If you are in doubt about whether to list a relationship/activity/interest, it is preferable that you do so.

The author's relationships/activities/interests should be defined broadly. For example, if your manuscript pertains to the epidemiology of hypertension, you should declare all relationships with manufacturers of antihypertensive medication, even if that medication is not mentioned in the manuscript.

In item #1 below, report all support for the work reported in this manuscript without time limit. For all other items, the time frame for disclosure is the past 36 months.

|                                                                                                                                  | Name all entities with whom you have this relationship or indicate none (add rows as needed)                                                                                      | Specifications/Comments (e.g., if payments were made to you or to your institution)                                                                                                                                                                                                                                                                                                                                                                                                                                                                                                                                                                                                                                                                                                                                   |                                                                                                                                  |                                                                                                                                                                                   |  |                                                                                                     |  |                                               |  |                                                                 |
|----------------------------------------------------------------------------------------------------------------------------------|-----------------------------------------------------------------------------------------------------------------------------------------------------------------------------------|-----------------------------------------------------------------------------------------------------------------------------------------------------------------------------------------------------------------------------------------------------------------------------------------------------------------------------------------------------------------------------------------------------------------------------------------------------------------------------------------------------------------------------------------------------------------------------------------------------------------------------------------------------------------------------------------------------------------------------------------------------------------------------------------------------------------------|----------------------------------------------------------------------------------------------------------------------------------|-----------------------------------------------------------------------------------------------------------------------------------------------------------------------------------|--|-----------------------------------------------------------------------------------------------------|--|-----------------------------------------------|--|-----------------------------------------------------------------|
| Time frame: Since the initial planning of the work                                                                               |                                                                                                                                                                                   |                                                                                                                                                                                                                                                                                                                                                                                                                                                                                                                                                                                                                                                                                                                                                                                                                       |                                                                                                                                  |                                                                                                                                                                                   |  |                                                                                                     |  |                                               |  |                                                                 |
| <b>1</b>                                                                                                                         | All support for the present manuscript (e.g., funding, provision of study materials, medical writing, article processing charges, etc.)<br><b>No time limit for this item.</b>    | <input type="checkbox"/> None<br><br><table border="1" style="width: 100%; border-collapse: collapse;"> <tr> <td style="width: 60%;">General funding started in 01.04.2020 and ended 31.05.2022<br/><b>German Federal Ministry of Health funded the clinical trial</b></td> <td style="width: 40%;"><b>German Federal Ministry of Health funded the clinical trial. Expense reimbursement for patient treatment paid by the sponsor DRK Blutspendedienst Baden-Württemberg Hesser</b></td> </tr> <tr> <td></td> <td>up to 630 € per enrolled donor including first plasmapheresis, 420 € per subsequent plasma donation</td> </tr> <tr> <td></td> <td>up to 310 € per donor in the follow up period</td> </tr> <tr> <td></td> <td>All paid to participating institution [not to the investigator]</td> </tr> </table> | General funding started in 01.04.2020 and ended 31.05.2022<br><b>German Federal Ministry of Health funded the clinical trial</b> | <b>German Federal Ministry of Health funded the clinical trial. Expense reimbursement for patient treatment paid by the sponsor DRK Blutspendedienst Baden-Württemberg Hesser</b> |  | up to 630 € per enrolled donor including first plasmapheresis, 420 € per subsequent plasma donation |  | up to 310 € per donor in the follow up period |  | All paid to participating institution [not to the investigator] |
| General funding started in 01.04.2020 and ended 31.05.2022<br><b>German Federal Ministry of Health funded the clinical trial</b> | <b>German Federal Ministry of Health funded the clinical trial. Expense reimbursement for patient treatment paid by the sponsor DRK Blutspendedienst Baden-Württemberg Hesser</b> |                                                                                                                                                                                                                                                                                                                                                                                                                                                                                                                                                                                                                                                                                                                                                                                                                       |                                                                                                                                  |                                                                                                                                                                                   |  |                                                                                                     |  |                                               |  |                                                                 |
|                                                                                                                                  | up to 630 € per enrolled donor including first plasmapheresis, 420 € per subsequent plasma donation                                                                               |                                                                                                                                                                                                                                                                                                                                                                                                                                                                                                                                                                                                                                                                                                                                                                                                                       |                                                                                                                                  |                                                                                                                                                                                   |  |                                                                                                     |  |                                               |  |                                                                 |
|                                                                                                                                  | up to 310 € per donor in the follow up period                                                                                                                                     |                                                                                                                                                                                                                                                                                                                                                                                                                                                                                                                                                                                                                                                                                                                                                                                                                       |                                                                                                                                  |                                                                                                                                                                                   |  |                                                                                                     |  |                                               |  |                                                                 |
|                                                                                                                                  | All paid to participating institution [not to the investigator]                                                                                                                   |                                                                                                                                                                                                                                                                                                                                                                                                                                                                                                                                                                                                                                                                                                                                                                                                                       |                                                                                                                                  |                                                                                                                                                                                   |  |                                                                                                     |  |                                               |  |                                                                 |
| Time frame: past 36 months                                                                                                       |                                                                                                                                                                                   |                                                                                                                                                                                                                                                                                                                                                                                                                                                                                                                                                                                                                                                                                                                                                                                                                       |                                                                                                                                  |                                                                                                                                                                                   |  |                                                                                                     |  |                                               |  |                                                                 |
| <b>2</b>                                                                                                                         | Grants or contracts from any entity (if not indicated in item #1 above).                                                                                                          | <input checked="" type="checkbox"/> None<br><br><table border="1" style="width: 100%; border-collapse: collapse;"> <tr><td style="width: 60%;"></td><td style="width: 40%;"></td></tr> <tr><td></td><td></td></tr> <tr><td></td><td></td></tr> </table>                                                                                                                                                                                                                                                                                                                                                                                                                                                                                                                                                               |                                                                                                                                  |                                                                                                                                                                                   |  |                                                                                                     |  |                                               |  |                                                                 |
|                                                                                                                                  |                                                                                                                                                                                   |                                                                                                                                                                                                                                                                                                                                                                                                                                                                                                                                                                                                                                                                                                                                                                                                                       |                                                                                                                                  |                                                                                                                                                                                   |  |                                                                                                     |  |                                               |  |                                                                 |
|                                                                                                                                  |                                                                                                                                                                                   |                                                                                                                                                                                                                                                                                                                                                                                                                                                                                                                                                                                                                                                                                                                                                                                                                       |                                                                                                                                  |                                                                                                                                                                                   |  |                                                                                                     |  |                                               |  |                                                                 |
|                                                                                                                                  |                                                                                                                                                                                   |                                                                                                                                                                                                                                                                                                                                                                                                                                                                                                                                                                                                                                                                                                                                                                                                                       |                                                                                                                                  |                                                                                                                                                                                   |  |                                                                                                     |  |                                               |  |                                                                 |

|   |                                                                                                              | Name all entities with whom you have this relationship or indicate none (add rows as needed) | Specifications/Comments (e.g., if payments were made to you or to your institution) |
|---|--------------------------------------------------------------------------------------------------------------|----------------------------------------------------------------------------------------------|-------------------------------------------------------------------------------------|
| 3 | Royalties or licenses                                                                                        | <input checked="" type="checkbox"/> None                                                     |                                                                                     |
|   |                                                                                                              |                                                                                              |                                                                                     |
|   |                                                                                                              |                                                                                              |                                                                                     |
|   |                                                                                                              |                                                                                              |                                                                                     |
| 4 | Consulting fees                                                                                              | <input checked="" type="checkbox"/> None                                                     |                                                                                     |
|   |                                                                                                              |                                                                                              |                                                                                     |
|   |                                                                                                              |                                                                                              |                                                                                     |
|   |                                                                                                              |                                                                                              |                                                                                     |
| 5 | Payment or honoraria for lectures, presentations, speakers bureaus, manuscript writing or educational events | <input checked="" type="checkbox"/> None                                                     |                                                                                     |
|   |                                                                                                              |                                                                                              |                                                                                     |
|   |                                                                                                              |                                                                                              |                                                                                     |
|   |                                                                                                              |                                                                                              |                                                                                     |
| 6 | Payment for expert testimony                                                                                 | <input checked="" type="checkbox"/> None                                                     |                                                                                     |
|   |                                                                                                              |                                                                                              |                                                                                     |
|   |                                                                                                              |                                                                                              |                                                                                     |
|   |                                                                                                              |                                                                                              |                                                                                     |
| 7 | Support for attending meetings and/or travel                                                                 | <input checked="" type="checkbox"/> None                                                     |                                                                                     |
|   |                                                                                                              |                                                                                              |                                                                                     |
|   |                                                                                                              |                                                                                              |                                                                                     |
|   |                                                                                                              |                                                                                              |                                                                                     |
| 8 | Patents planned, issued or pending                                                                           | <input checked="" type="checkbox"/> None                                                     |                                                                                     |
|   |                                                                                                              |                                                                                              |                                                                                     |
|   |                                                                                                              |                                                                                              |                                                                                     |
|   |                                                                                                              |                                                                                              |                                                                                     |
| 9 | Participation on a Data Safety Monitoring Board or Advisory Board                                            | <input checked="" type="checkbox"/> None                                                     |                                                                                     |
|   |                                                                                                              |                                                                                              |                                                                                     |
|   |                                                                                                              |                                                                                              |                                                                                     |
|   |                                                                                                              |                                                                                              |                                                                                     |

|    |                                                                                                   | Name all entities with whom you have this relationship or indicate none (add rows as needed) | Specifications/Comments (e.g., if payments were made to you or to your institution) |
|----|---------------------------------------------------------------------------------------------------|----------------------------------------------------------------------------------------------|-------------------------------------------------------------------------------------|
| 10 | Leadership or fiduciary role in other board, society, committee or advocacy group, paid or unpaid | <input checked="" type="checkbox"/> None                                                     |                                                                                     |
|    |                                                                                                   |                                                                                              |                                                                                     |
|    |                                                                                                   |                                                                                              |                                                                                     |
|    |                                                                                                   |                                                                                              |                                                                                     |
| 11 | Stock or stock options                                                                            | <input checked="" type="checkbox"/> None                                                     |                                                                                     |
|    |                                                                                                   |                                                                                              |                                                                                     |
|    |                                                                                                   |                                                                                              |                                                                                     |
|    |                                                                                                   |                                                                                              |                                                                                     |
| 12 | Receipt of equipment, materials, drugs, medical writing, gifts or other services                  | <input checked="" type="checkbox"/> None                                                     |                                                                                     |
|    |                                                                                                   |                                                                                              |                                                                                     |
|    |                                                                                                   |                                                                                              |                                                                                     |
|    |                                                                                                   |                                                                                              |                                                                                     |
| 13 | Other financial or non-financial interests                                                        | <input checked="" type="checkbox"/> None                                                     |                                                                                     |
|    |                                                                                                   |                                                                                              |                                                                                     |
|    |                                                                                                   |                                                                                              |                                                                                     |
|    |                                                                                                   |                                                                                              |                                                                                     |

Please place an "X" next to the following statement to indicate your agreement:

I certify that I have answered every question and have not altered the wording of any of the questions on this form.

## ICMJE DISCLOSURE FORM

**Date:** 9/15/2022

**Your Name:** Victor M. Corman

**Manuscript Title:** One-year follow-up of the CAPSID randomized trial for high-dose convalescent plasma in severe COVID-19 patients

**Manuscript Number (if known):** 163657-JCI-CMED-RV-2

In the interest of transparency, we ask you to disclose all relationships/activities/interests listed below that are related to the content of your manuscript. "Related" means any relation with for-profit or not-for-profit third parties whose interests may be affected by the content of the manuscript. Disclosure represents a commitment to transparency and does not necessarily indicate a bias. If you are in doubt about whether to list a relationship/activity/interest, it is preferable that you do so.

The author's relationships/activities/interests should be defined broadly. For example, if your manuscript pertains to the epidemiology of hypertension, you should declare all relationships with manufacturers of antihypertensive medication, even if that medication is not mentioned in the manuscript.

In item #1 below, report all support for the work reported in this manuscript without time limit. For all other items, the time frame for disclosure is the past 36 months.

|                                                                                                                        | Name all entities with whom you have this relationship or indicate none (add rows as needed)                                                                                   | Specifications/Comments (e.g., if payments were made to you or to your institution)                                                                                                                                                                                                                                                                                                                                                                                                                                                                                                                                                                                                                                                                            |                                                                                                                        |                                                                                                                                                                           |                             |                                                                                                                 |  |  |  |  |  |  |
|------------------------------------------------------------------------------------------------------------------------|--------------------------------------------------------------------------------------------------------------------------------------------------------------------------------|----------------------------------------------------------------------------------------------------------------------------------------------------------------------------------------------------------------------------------------------------------------------------------------------------------------------------------------------------------------------------------------------------------------------------------------------------------------------------------------------------------------------------------------------------------------------------------------------------------------------------------------------------------------------------------------------------------------------------------------------------------------|------------------------------------------------------------------------------------------------------------------------|---------------------------------------------------------------------------------------------------------------------------------------------------------------------------|-----------------------------|-----------------------------------------------------------------------------------------------------------------|--|--|--|--|--|--|
| Time frame: Since the initial planning of the work                                                                     |                                                                                                                                                                                |                                                                                                                                                                                                                                                                                                                                                                                                                                                                                                                                                                                                                                                                                                                                                                |                                                                                                                        |                                                                                                                                                                           |                             |                                                                                                                 |  |  |  |  |  |  |
| <b>1</b>                                                                                                               | All support for the present manuscript (e.g., funding, provision of study materials, medical writing, article processing charges, etc.)<br><b>No time limit for this item.</b> | <input type="checkbox"/> None<br><table border="1" style="width: 100%; border-collapse: collapse;"> <tr> <td style="width: 60%;">General funding started in 01.04.2020 and ended 31.05.2022 German Federal Ministry of Health funded the clinical trial</td> <td style="width: 40%;">German Federal Ministry of Health funded the clinical trial. Expense reimbursement for patient treatment paid by the sponsor DRK Blutspendedienst Baden-Württemberg Hesse</td> </tr> <tr> <td>External Analytical Testing</td> <td>74,41 € per Test (SARS CoV2 Antibody IgG, IgA ELISA, Neutralizing AB Test) per patient or donor (Labo Vivantes)</td> </tr> <tr> <td> </td> <td> </td> </tr> <tr> <td> </td> <td> </td> </tr> <tr> <td> </td> <td> </td> </tr> </table> | General funding started in 01.04.2020 and ended 31.05.2022 German Federal Ministry of Health funded the clinical trial | German Federal Ministry of Health funded the clinical trial. Expense reimbursement for patient treatment paid by the sponsor DRK Blutspendedienst Baden-Württemberg Hesse | External Analytical Testing | 74,41 € per Test (SARS CoV2 Antibody IgG, IgA ELISA, Neutralizing AB Test) per patient or donor (Labo Vivantes) |  |  |  |  |  |  |
| General funding started in 01.04.2020 and ended 31.05.2022 German Federal Ministry of Health funded the clinical trial | German Federal Ministry of Health funded the clinical trial. Expense reimbursement for patient treatment paid by the sponsor DRK Blutspendedienst Baden-Württemberg Hesse      |                                                                                                                                                                                                                                                                                                                                                                                                                                                                                                                                                                                                                                                                                                                                                                |                                                                                                                        |                                                                                                                                                                           |                             |                                                                                                                 |  |  |  |  |  |  |
| External Analytical Testing                                                                                            | 74,41 € per Test (SARS CoV2 Antibody IgG, IgA ELISA, Neutralizing AB Test) per patient or donor (Labo Vivantes)                                                                |                                                                                                                                                                                                                                                                                                                                                                                                                                                                                                                                                                                                                                                                                                                                                                |                                                                                                                        |                                                                                                                                                                           |                             |                                                                                                                 |  |  |  |  |  |  |
|                                                                                                                        |                                                                                                                                                                                |                                                                                                                                                                                                                                                                                                                                                                                                                                                                                                                                                                                                                                                                                                                                                                |                                                                                                                        |                                                                                                                                                                           |                             |                                                                                                                 |  |  |  |  |  |  |
|                                                                                                                        |                                                                                                                                                                                |                                                                                                                                                                                                                                                                                                                                                                                                                                                                                                                                                                                                                                                                                                                                                                |                                                                                                                        |                                                                                                                                                                           |                             |                                                                                                                 |  |  |  |  |  |  |
|                                                                                                                        |                                                                                                                                                                                |                                                                                                                                                                                                                                                                                                                                                                                                                                                                                                                                                                                                                                                                                                                                                                |                                                                                                                        |                                                                                                                                                                           |                             |                                                                                                                 |  |  |  |  |  |  |
| Time frame: past 36 months                                                                                             |                                                                                                                                                                                |                                                                                                                                                                                                                                                                                                                                                                                                                                                                                                                                                                                                                                                                                                                                                                |                                                                                                                        |                                                                                                                                                                           |                             |                                                                                                                 |  |  |  |  |  |  |
| <b>2</b>                                                                                                               | Grants or contracts from any entity (if not indicated in item #1 above).                                                                                                       | <input checked="" type="checkbox"/> None<br><table border="1" style="width: 100%; border-collapse: collapse;"> <tr> <td style="width: 60%;"> </td> <td style="width: 40%;"> </td> </tr> <tr> <td> </td> <td> </td> </tr> <tr> <td> </td> <td> </td> </tr> </table>                                                                                                                                                                                                                                                                                                                                                                                                                                                                                             |                                                                                                                        |                                                                                                                                                                           |                             |                                                                                                                 |  |  |  |  |  |  |
|                                                                                                                        |                                                                                                                                                                                |                                                                                                                                                                                                                                                                                                                                                                                                                                                                                                                                                                                                                                                                                                                                                                |                                                                                                                        |                                                                                                                                                                           |                             |                                                                                                                 |  |  |  |  |  |  |
|                                                                                                                        |                                                                                                                                                                                |                                                                                                                                                                                                                                                                                                                                                                                                                                                                                                                                                                                                                                                                                                                                                                |                                                                                                                        |                                                                                                                                                                           |                             |                                                                                                                 |  |  |  |  |  |  |
|                                                                                                                        |                                                                                                                                                                                |                                                                                                                                                                                                                                                                                                                                                                                                                                                                                                                                                                                                                                                                                                                                                                |                                                                                                                        |                                                                                                                                                                           |                             |                                                                                                                 |  |  |  |  |  |  |

|   |                                                                                                              | Name all entities with whom you have this relationship or indicate none (add rows as needed)                                                                                                                         | Specifications/Comments (e.g., if payments were made to you or to your institution) |
|---|--------------------------------------------------------------------------------------------------------------|----------------------------------------------------------------------------------------------------------------------------------------------------------------------------------------------------------------------|-------------------------------------------------------------------------------------|
| 3 | Royalties or licenses                                                                                        | <input checked="" type="checkbox"/> None                                                                                                                                                                             |                                                                                     |
|   |                                                                                                              |                                                                                                                                                                                                                      |                                                                                     |
|   |                                                                                                              |                                                                                                                                                                                                                      |                                                                                     |
|   |                                                                                                              |                                                                                                                                                                                                                      |                                                                                     |
| 4 | Consulting fees                                                                                              | <input checked="" type="checkbox"/> None                                                                                                                                                                             |                                                                                     |
|   |                                                                                                              |                                                                                                                                                                                                                      |                                                                                     |
|   |                                                                                                              |                                                                                                                                                                                                                      |                                                                                     |
|   |                                                                                                              |                                                                                                                                                                                                                      |                                                                                     |
| 5 | Payment or honoraria for lectures, presentations, speakers bureaus, manuscript writing or educational events | <input checked="" type="checkbox"/> None                                                                                                                                                                             |                                                                                     |
|   |                                                                                                              |                                                                                                                                                                                                                      |                                                                                     |
|   |                                                                                                              |                                                                                                                                                                                                                      |                                                                                     |
|   |                                                                                                              |                                                                                                                                                                                                                      |                                                                                     |
| 6 | Payment for expert testimony                                                                                 | <input checked="" type="checkbox"/> None                                                                                                                                                                             |                                                                                     |
|   |                                                                                                              |                                                                                                                                                                                                                      |                                                                                     |
|   |                                                                                                              |                                                                                                                                                                                                                      |                                                                                     |
|   |                                                                                                              |                                                                                                                                                                                                                      |                                                                                     |
| 7 | Support for attending meetings and/or travel                                                                 | <input checked="" type="checkbox"/> None                                                                                                                                                                             |                                                                                     |
|   |                                                                                                              |                                                                                                                                                                                                                      |                                                                                     |
|   |                                                                                                              |                                                                                                                                                                                                                      |                                                                                     |
|   |                                                                                                              |                                                                                                                                                                                                                      |                                                                                     |
| 8 | Patents planned, issued or pending                                                                           | <input type="checkbox"/> None                                                                                                                                                                                        |                                                                                     |
|   |                                                                                                              | VMC are named together with Charite Universitaetsmedizin Berlin and Euroimmun Medizinische Labordiagnostika AG on a patent application (EP3715847) filed regarding the diagnostic of SARS-CoV-2 by antibody testing. |                                                                                     |
|   |                                                                                                              |                                                                                                                                                                                                                      |                                                                                     |
|   |                                                                                                              |                                                                                                                                                                                                                      |                                                                                     |
| 9 | Participation on a Data Safety Monitoring                                                                    | <input checked="" type="checkbox"/> None                                                                                                                                                                             |                                                                                     |
|   |                                                                                                              |                                                                                                                                                                                                                      |                                                                                     |
|   |                                                                                                              |                                                                                                                                                                                                                      |                                                                                     |

|           |                                                                                                   | Name all entities with whom you have this relationship or indicate none (add rows as needed) | Specifications/Comments (e.g., if payments were made to you or to your institution) |
|-----------|---------------------------------------------------------------------------------------------------|----------------------------------------------------------------------------------------------|-------------------------------------------------------------------------------------|
|           | Board or Advisory Board                                                                           |                                                                                              |                                                                                     |
| <b>10</b> | Leadership or fiduciary role in other board, society, committee or advocacy group, paid or unpaid | <input checked="" type="checkbox"/> <b>None</b>                                              |                                                                                     |
|           |                                                                                                   |                                                                                              |                                                                                     |
|           |                                                                                                   |                                                                                              |                                                                                     |
| <b>11</b> | Stock or stock options                                                                            | <input checked="" type="checkbox"/> <b>None</b>                                              |                                                                                     |
|           |                                                                                                   |                                                                                              |                                                                                     |
|           |                                                                                                   |                                                                                              |                                                                                     |
| <b>12</b> | Receipt of equipment, materials, drugs, medical writing, gifts or other services                  | <input checked="" type="checkbox"/> <b>None</b>                                              |                                                                                     |
|           |                                                                                                   |                                                                                              |                                                                                     |
|           |                                                                                                   |                                                                                              |                                                                                     |
| <b>13</b> | Other financial or non-financial interests                                                        | <input checked="" type="checkbox"/> <b>None</b>                                              |                                                                                     |
|           |                                                                                                   |                                                                                              |                                                                                     |
|           |                                                                                                   |                                                                                              |                                                                                     |

Please place an "X" next to the following statement to indicate your agreement:

I certify that I have answered every question and have not altered the wording of any of the questions on this form.

## ICMJE DISCLOSURE FORM

**Date:** 9/15/2022

**Your Name:** Dr. Gerlinde Schmidtke-Schrezenmeier

**Manuscript Title:** One-year follow-up of the CAPSID randomized trial for high-dose convalescent plasma in severe COVID-19 patients

**Manuscript Number (if known):** 163657-JCI-CMED-RV-2

In the interest of transparency, we ask you to disclose all relationships/activities/interests listed below that are related to the content of your manuscript. "Related" means any relation with for-profit or not-for-profit third parties whose interests may be affected by the content of the manuscript. Disclosure represents a commitment to transparency and does not necessarily indicate a bias. If you are in doubt about whether to list a relationship/activity/interest, it is preferable that you do so.

The author's relationships/activities/interests should be defined broadly. For example, if your manuscript pertains to the epidemiology of hypertension, you should declare all relationships with manufacturers of antihypertensive medication, even if that medication is not mentioned in the manuscript.

In item #1 below, report all support for the work reported in this manuscript without time limit. For all other items, the time frame for disclosure is the past 36 months.

|                                                    | Name all entities with whom you have this relationship or indicate none (add rows as needed)                                                                                   | Specifications/Comments (e.g., if payments were made to you or to your institution)                                                                                                                                                                                                                                                   |  |  |  |  |  |  |
|----------------------------------------------------|--------------------------------------------------------------------------------------------------------------------------------------------------------------------------------|---------------------------------------------------------------------------------------------------------------------------------------------------------------------------------------------------------------------------------------------------------------------------------------------------------------------------------------|--|--|--|--|--|--|
| Time frame: Since the initial planning of the work |                                                                                                                                                                                |                                                                                                                                                                                                                                                                                                                                       |  |  |  |  |  |  |
| <b>1</b>                                           | All support for the present manuscript (e.g., funding, provision of study materials, medical writing, article processing charges, etc.)<br><b>No time limit for this item.</b> | <input checked="" type="checkbox"/> <b>None</b>                                                                                                                                                                                                                                                                                       |  |  |  |  |  |  |
| Time frame: past 36 months                         |                                                                                                                                                                                |                                                                                                                                                                                                                                                                                                                                       |  |  |  |  |  |  |
| <b>2</b>                                           | Grants or contracts from any entity (if not indicated in item #1 above).                                                                                                       | <input checked="" type="checkbox"/> <b>None</b><br><table border="1" style="width: 100%; border-collapse: collapse; margin-top: 5px;"> <tr><td style="width: 60%; height: 15px;"></td><td style="width: 40%;"></td></tr> <tr><td style="height: 15px;"></td><td></td></tr> <tr><td style="height: 15px;"></td><td></td></tr> </table> |  |  |  |  |  |  |
|                                                    |                                                                                                                                                                                |                                                                                                                                                                                                                                                                                                                                       |  |  |  |  |  |  |
|                                                    |                                                                                                                                                                                |                                                                                                                                                                                                                                                                                                                                       |  |  |  |  |  |  |
|                                                    |                                                                                                                                                                                |                                                                                                                                                                                                                                                                                                                                       |  |  |  |  |  |  |



|          | Name all entities with whom you have this relationship or indicate none (add rows as needed)                 | Specifications/Comments (e.g., if payments were made to you or to your institution)                                                                                                               |  |  |  |  |  |  |
|----------|--------------------------------------------------------------------------------------------------------------|---------------------------------------------------------------------------------------------------------------------------------------------------------------------------------------------------|--|--|--|--|--|--|
| <b>3</b> | Royalties or licenses                                                                                        | <input checked="" type="checkbox"/> <b>None</b><br><table border="1" data-bbox="437 383 1522 488"> <tr><td></td><td></td></tr> <tr><td></td><td></td></tr> <tr><td></td><td></td></tr> </table>   |  |  |  |  |  |  |
|          |                                                                                                              |                                                                                                                                                                                                   |  |  |  |  |  |  |
|          |                                                                                                              |                                                                                                                                                                                                   |  |  |  |  |  |  |
|          |                                                                                                              |                                                                                                                                                                                                   |  |  |  |  |  |  |
| <b>4</b> | Consulting fees                                                                                              | <input checked="" type="checkbox"/> <b>None</b><br><table border="1" data-bbox="437 629 1522 734"> <tr><td></td><td></td></tr> <tr><td></td><td></td></tr> <tr><td></td><td></td></tr> </table>   |  |  |  |  |  |  |
|          |                                                                                                              |                                                                                                                                                                                                   |  |  |  |  |  |  |
|          |                                                                                                              |                                                                                                                                                                                                   |  |  |  |  |  |  |
|          |                                                                                                              |                                                                                                                                                                                                   |  |  |  |  |  |  |
| <b>5</b> | Payment or honoraria for lectures, presentations, speakers bureaus, manuscript writing or educational events | <input checked="" type="checkbox"/> <b>None</b><br><table border="1" data-bbox="437 853 1522 958"> <tr><td></td><td></td></tr> <tr><td></td><td></td></tr> <tr><td></td><td></td></tr> </table>   |  |  |  |  |  |  |
|          |                                                                                                              |                                                                                                                                                                                                   |  |  |  |  |  |  |
|          |                                                                                                              |                                                                                                                                                                                                   |  |  |  |  |  |  |
|          |                                                                                                              |                                                                                                                                                                                                   |  |  |  |  |  |  |
| <b>6</b> | Payment for expert testimony                                                                                 | <input checked="" type="checkbox"/> <b>None</b><br><table border="1" data-bbox="437 1261 1522 1366"> <tr><td></td><td></td></tr> <tr><td></td><td></td></tr> <tr><td></td><td></td></tr> </table> |  |  |  |  |  |  |
|          |                                                                                                              |                                                                                                                                                                                                   |  |  |  |  |  |  |
|          |                                                                                                              |                                                                                                                                                                                                   |  |  |  |  |  |  |
|          |                                                                                                              |                                                                                                                                                                                                   |  |  |  |  |  |  |
| <b>7</b> | Support for attending meetings and/or travel                                                                 | <input checked="" type="checkbox"/> <b>None</b><br><table border="1" data-bbox="437 1485 1522 1590"> <tr><td></td><td></td></tr> <tr><td></td><td></td></tr> <tr><td></td><td></td></tr> </table> |  |  |  |  |  |  |
|          |                                                                                                              |                                                                                                                                                                                                   |  |  |  |  |  |  |
|          |                                                                                                              |                                                                                                                                                                                                   |  |  |  |  |  |  |
|          |                                                                                                              |                                                                                                                                                                                                   |  |  |  |  |  |  |
| <b>8</b> | Patents planned, issued or pending                                                                           | <input checked="" type="checkbox"/> <b>None</b><br><table border="1" data-bbox="437 1709 1522 1814"> <tr><td></td><td></td></tr> <tr><td></td><td></td></tr> <tr><td></td><td></td></tr> </table> |  |  |  |  |  |  |
|          |                                                                                                              |                                                                                                                                                                                                   |  |  |  |  |  |  |
|          |                                                                                                              |                                                                                                                                                                                                   |  |  |  |  |  |  |
|          |                                                                                                              |                                                                                                                                                                                                   |  |  |  |  |  |  |
| <b>9</b> | Participation on a Data Safety Monitoring Board or Advisory Board                                            | <input checked="" type="checkbox"/> <b>None</b><br><table border="1" data-bbox="437 1933 1522 2038"> <tr><td></td><td></td></tr> <tr><td></td><td></td></tr> <tr><td></td><td></td></tr> </table> |  |  |  |  |  |  |
|          |                                                                                                              |                                                                                                                                                                                                   |  |  |  |  |  |  |
|          |                                                                                                              |                                                                                                                                                                                                   |  |  |  |  |  |  |
|          |                                                                                                              |                                                                                                                                                                                                   |  |  |  |  |  |  |

|    |                                                                                                   | Name all entities with whom you have this relationship or indicate none (add rows as needed) | Specifications/Comments (e.g., if payments were made to you or to your institution) |
|----|---------------------------------------------------------------------------------------------------|----------------------------------------------------------------------------------------------|-------------------------------------------------------------------------------------|
| 10 | Leadership or fiduciary role in other board, society, committee or advocacy group, paid or unpaid | <input checked="" type="checkbox"/> None                                                     |                                                                                     |
|    |                                                                                                   |                                                                                              |                                                                                     |
|    |                                                                                                   |                                                                                              |                                                                                     |
|    |                                                                                                   |                                                                                              |                                                                                     |
| 11 | Stock or stock options                                                                            | <input checked="" type="checkbox"/> None                                                     |                                                                                     |
|    |                                                                                                   |                                                                                              |                                                                                     |
|    |                                                                                                   |                                                                                              |                                                                                     |
|    |                                                                                                   |                                                                                              |                                                                                     |
| 12 | Receipt of equipment, materials, drugs, medical writing, gifts or other services                  | <input checked="" type="checkbox"/> None                                                     |                                                                                     |
|    |                                                                                                   |                                                                                              |                                                                                     |
|    |                                                                                                   |                                                                                              |                                                                                     |
|    |                                                                                                   |                                                                                              |                                                                                     |
| 13 | Other financial or non-financial interests                                                        | <input checked="" type="checkbox"/> None                                                     |                                                                                     |
|    |                                                                                                   |                                                                                              |                                                                                     |
|    |                                                                                                   |                                                                                              |                                                                                     |
|    |                                                                                                   |                                                                                              |                                                                                     |

Please place an "X" next to the following statement to indicate your agreement:

I certify that I have answered every question and have not altered the wording of any of the questions on this form.

## ICMJE DISCLOSURE FORM

**Date:** 9/15/2022

**Your Name:** Prof. Benjamin Mayer

**Manuscript Title:** One-year follow-up of the CAPSID randomized trial for high-dose convalescent plasma in severe COVID-19 patients

**Manuscript Number (if known):** 163657-JCI-CMED-RV-2

In the interest of transparency, we ask you to disclose all relationships/activities/interests listed below that are related to the content of your manuscript. "Related" means any relation with for-profit or not-for-profit third parties whose interests may be affected by the content of the manuscript. Disclosure represents a commitment to transparency and does not necessarily indicate a bias. If you are in doubt about whether to list a relationship/activity/interest, it is preferable that you do so.

The author's relationships/activities/interests should be defined broadly. For example, if your manuscript pertains to the epidemiology of hypertension, you should declare all relationships with manufacturers of antihypertensive medication, even if that medication is not mentioned in the manuscript.

In item #1 below, report all support for the work reported in this manuscript without time limit. For all other items, the time frame for disclosure is the past 36 months.

|                                                                                                                                  | Name all entities with whom you have this relationship or indicate none (add rows as needed)                                                                                   | Specifications/Comments (e.g., if payments were made to you or to your institution)                                                                                                                                                                                                                                                                                                                                                                                                                                                                                                                      |                                                                                                                                  |                                                                                                                                                                           |                                        |                                                 |  |  |
|----------------------------------------------------------------------------------------------------------------------------------|--------------------------------------------------------------------------------------------------------------------------------------------------------------------------------|----------------------------------------------------------------------------------------------------------------------------------------------------------------------------------------------------------------------------------------------------------------------------------------------------------------------------------------------------------------------------------------------------------------------------------------------------------------------------------------------------------------------------------------------------------------------------------------------------------|----------------------------------------------------------------------------------------------------------------------------------|---------------------------------------------------------------------------------------------------------------------------------------------------------------------------|----------------------------------------|-------------------------------------------------|--|--|
| Time frame: Since the initial planning of the work                                                                               |                                                                                                                                                                                |                                                                                                                                                                                                                                                                                                                                                                                                                                                                                                                                                                                                          |                                                                                                                                  |                                                                                                                                                                           |                                        |                                                 |  |  |
| <b>1</b>                                                                                                                         | All support for the present manuscript (e.g., funding, provision of study materials, medical writing, article processing charges, etc.)<br><b>No time limit for this item.</b> | <input type="checkbox"/> <b>None</b><br><br><table border="1" style="width: 100%; border-collapse: collapse;"> <tr> <td style="width: 60%;">General funding started in 01.04.2020 and ended 31.05.2022<br/><b>German Federal Ministry of Health funded the clinical trial</b></td> <td>German Federal Ministry of Health funded the clinical trial. Expense reimbursement for patient treatment paid by the sponsor DRK Blutspendedienst Baden-Württemberg Hesse</td> </tr> <tr> <td>Biometrical Data Evaluation and Report</td> <td>12.600€ (Prof. Dr. B. Mayer, University of Ulm)</td> </tr> </table> | General funding started in 01.04.2020 and ended 31.05.2022<br><b>German Federal Ministry of Health funded the clinical trial</b> | German Federal Ministry of Health funded the clinical trial. Expense reimbursement for patient treatment paid by the sponsor DRK Blutspendedienst Baden-Württemberg Hesse | Biometrical Data Evaluation and Report | 12.600€ (Prof. Dr. B. Mayer, University of Ulm) |  |  |
| General funding started in 01.04.2020 and ended 31.05.2022<br><b>German Federal Ministry of Health funded the clinical trial</b> | German Federal Ministry of Health funded the clinical trial. Expense reimbursement for patient treatment paid by the sponsor DRK Blutspendedienst Baden-Württemberg Hesse      |                                                                                                                                                                                                                                                                                                                                                                                                                                                                                                                                                                                                          |                                                                                                                                  |                                                                                                                                                                           |                                        |                                                 |  |  |
| Biometrical Data Evaluation and Report                                                                                           | 12.600€ (Prof. Dr. B. Mayer, University of Ulm)                                                                                                                                |                                                                                                                                                                                                                                                                                                                                                                                                                                                                                                                                                                                                          |                                                                                                                                  |                                                                                                                                                                           |                                        |                                                 |  |  |
| Time frame: past 36 months                                                                                                       |                                                                                                                                                                                |                                                                                                                                                                                                                                                                                                                                                                                                                                                                                                                                                                                                          |                                                                                                                                  |                                                                                                                                                                           |                                        |                                                 |  |  |
| <b>2</b>                                                                                                                         | Grants or contracts from any entity (if not indicated in item #1 above).                                                                                                       | <input checked="" type="checkbox"/> <b>None</b><br><br><table border="1" style="width: 100%; border-collapse: collapse;"> <tr><td style="width: 60%; height: 20px;"> </td><td> </td></tr> <tr><td style="height: 20px;"> </td><td> </td></tr> <tr><td style="height: 20px;"> </td><td> </td></tr> </table>                                                                                                                                                                                                                                                                                               |                                                                                                                                  |                                                                                                                                                                           |                                        |                                                 |  |  |
|                                                                                                                                  |                                                                                                                                                                                |                                                                                                                                                                                                                                                                                                                                                                                                                                                                                                                                                                                                          |                                                                                                                                  |                                                                                                                                                                           |                                        |                                                 |  |  |
|                                                                                                                                  |                                                                                                                                                                                |                                                                                                                                                                                                                                                                                                                                                                                                                                                                                                                                                                                                          |                                                                                                                                  |                                                                                                                                                                           |                                        |                                                 |  |  |
|                                                                                                                                  |                                                                                                                                                                                |                                                                                                                                                                                                                                                                                                                                                                                                                                                                                                                                                                                                          |                                                                                                                                  |                                                                                                                                                                           |                                        |                                                 |  |  |

|   | Name all entities with whom you have this relationship or indicate none (add rows as needed)                 | Specifications/Comments (e.g., if payments were made to you or to your institution)                                                                                                                     |  |  |  |  |  |  |
|---|--------------------------------------------------------------------------------------------------------------|---------------------------------------------------------------------------------------------------------------------------------------------------------------------------------------------------------|--|--|--|--|--|--|
| 3 | Royalties or licenses                                                                                        | <input checked="" type="checkbox"/> <b>None</b><br><table border="1" data-bbox="437 383 1011 488"> <tr><td> </td><td> </td></tr> <tr><td> </td><td> </td></tr> <tr><td> </td><td> </td></tr> </table>   |  |  |  |  |  |  |
|   |                                                                                                              |                                                                                                                                                                                                         |  |  |  |  |  |  |
|   |                                                                                                              |                                                                                                                                                                                                         |  |  |  |  |  |  |
|   |                                                                                                              |                                                                                                                                                                                                         |  |  |  |  |  |  |
| 4 | Consulting fees                                                                                              | <input checked="" type="checkbox"/> <b>None</b><br><table border="1" data-bbox="437 629 1011 734"> <tr><td> </td><td> </td></tr> <tr><td> </td><td> </td></tr> <tr><td> </td><td> </td></tr> </table>   |  |  |  |  |  |  |
|   |                                                                                                              |                                                                                                                                                                                                         |  |  |  |  |  |  |
|   |                                                                                                              |                                                                                                                                                                                                         |  |  |  |  |  |  |
|   |                                                                                                              |                                                                                                                                                                                                         |  |  |  |  |  |  |
| 5 | Payment or honoraria for lectures, presentations, speakers bureaus, manuscript writing or educational events | <input checked="" type="checkbox"/> <b>None</b><br><table border="1" data-bbox="437 853 1011 958"> <tr><td> </td><td> </td></tr> <tr><td> </td><td> </td></tr> <tr><td> </td><td> </td></tr> </table>   |  |  |  |  |  |  |
|   |                                                                                                              |                                                                                                                                                                                                         |  |  |  |  |  |  |
|   |                                                                                                              |                                                                                                                                                                                                         |  |  |  |  |  |  |
|   |                                                                                                              |                                                                                                                                                                                                         |  |  |  |  |  |  |
| 6 | Payment for expert testimony                                                                                 | <input checked="" type="checkbox"/> <b>None</b><br><table border="1" data-bbox="437 1200 1011 1305"> <tr><td> </td><td> </td></tr> <tr><td> </td><td> </td></tr> <tr><td> </td><td> </td></tr> </table> |  |  |  |  |  |  |
|   |                                                                                                              |                                                                                                                                                                                                         |  |  |  |  |  |  |
|   |                                                                                                              |                                                                                                                                                                                                         |  |  |  |  |  |  |
|   |                                                                                                              |                                                                                                                                                                                                         |  |  |  |  |  |  |
| 7 | Support for attending meetings and/or travel                                                                 | <input checked="" type="checkbox"/> <b>None</b><br><table border="1" data-bbox="437 1413 1011 1518"> <tr><td> </td><td> </td></tr> <tr><td> </td><td> </td></tr> <tr><td> </td><td> </td></tr> </table> |  |  |  |  |  |  |
|   |                                                                                                              |                                                                                                                                                                                                         |  |  |  |  |  |  |
|   |                                                                                                              |                                                                                                                                                                                                         |  |  |  |  |  |  |
|   |                                                                                                              |                                                                                                                                                                                                         |  |  |  |  |  |  |
| 8 | Patents planned, issued or pending                                                                           | <input checked="" type="checkbox"/> <b>None</b><br><table border="1" data-bbox="437 1637 1011 1742"> <tr><td> </td><td> </td></tr> <tr><td> </td><td> </td></tr> <tr><td> </td><td> </td></tr> </table> |  |  |  |  |  |  |
|   |                                                                                                              |                                                                                                                                                                                                         |  |  |  |  |  |  |
|   |                                                                                                              |                                                                                                                                                                                                         |  |  |  |  |  |  |
|   |                                                                                                              |                                                                                                                                                                                                         |  |  |  |  |  |  |
| 9 | Participation on a Data Safety Monitoring Board or Advisory Board                                            | <input checked="" type="checkbox"/> <b>None</b><br><table border="1" data-bbox="437 1861 1011 1966"> <tr><td> </td><td> </td></tr> <tr><td> </td><td> </td></tr> <tr><td> </td><td> </td></tr> </table> |  |  |  |  |  |  |
|   |                                                                                                              |                                                                                                                                                                                                         |  |  |  |  |  |  |
|   |                                                                                                              |                                                                                                                                                                                                         |  |  |  |  |  |  |
|   |                                                                                                              |                                                                                                                                                                                                         |  |  |  |  |  |  |

|           |                                                                                                   | Name all entities with whom you have this relationship or indicate none (add rows as needed) | Specifications/Comments (e.g., if payments were made to you or to your institution) |
|-----------|---------------------------------------------------------------------------------------------------|----------------------------------------------------------------------------------------------|-------------------------------------------------------------------------------------|
| <b>10</b> | Leadership or fiduciary role in other board, society, committee or advocacy group, paid or unpaid | <input checked="" type="checkbox"/> <b>None</b>                                              |                                                                                     |
|           |                                                                                                   |                                                                                              |                                                                                     |
|           |                                                                                                   |                                                                                              |                                                                                     |
| <b>11</b> | Stock or stock options                                                                            | <input checked="" type="checkbox"/> <b>None</b>                                              |                                                                                     |
|           |                                                                                                   |                                                                                              |                                                                                     |
|           |                                                                                                   |                                                                                              |                                                                                     |
| <b>12</b> | Receipt of equipment, materials, drugs, medical writing, gifts or other services                  | <input checked="" type="checkbox"/> <b>None</b>                                              |                                                                                     |
|           |                                                                                                   |                                                                                              |                                                                                     |
|           |                                                                                                   |                                                                                              |                                                                                     |
| <b>13</b> | Other financial or non-financial interests                                                        | <input checked="" type="checkbox"/> <b>None</b>                                              |                                                                                     |
|           |                                                                                                   |                                                                                              |                                                                                     |
|           |                                                                                                   |                                                                                              |                                                                                     |

Please place an "X" next to the following statement to indicate your agreement:

I certify that I have answered every question and have not altered the wording of any of the questions on this form.

## ICMJE DISCLOSURE FORM

**Date:** 9/15/2022

**Your Name:** Philipp Schnecko

**Manuscript Title:** One-year follow-up of the CAPSID randomized trial for high-dose convalescent plasma in severe COVID-19 patients

**Manuscript Number (if known):** 163657-JCI-CMED-RV-2

In the interest of transparency, we ask you to disclose all relationships/activities/interests listed below that are related to the content of your manuscript. "Related" means any relation with for-profit or not-for-profit third parties whose interests may be affected by the content of the manuscript. Disclosure represents a commitment to transparency and does not necessarily indicate a bias. If you are in doubt about whether to list a relationship/activity/interest, it is preferable that you do so.

The author's relationships/activities/interests should be defined broadly. For example, if your manuscript pertains to the epidemiology of hypertension, you should declare all relationships with manufacturers of antihypertensive medication, even if that medication is not mentioned in the manuscript.

In item #1 below, report all support for the work reported in this manuscript without time limit. For all other items, the time frame for disclosure is the past 36 months.

|                                                           |                                                                                                                                                                                | Name all entities with whom you have this relationship or indicate none (add rows as needed)                                     | Specifications/Comments (e.g., if payments were made to you or to your institution)                                                                                               |
|-----------------------------------------------------------|--------------------------------------------------------------------------------------------------------------------------------------------------------------------------------|----------------------------------------------------------------------------------------------------------------------------------|-----------------------------------------------------------------------------------------------------------------------------------------------------------------------------------|
| <b>Time frame: Since the initial planning of the work</b> |                                                                                                                                                                                |                                                                                                                                  |                                                                                                                                                                                   |
| <b>1</b>                                                  | All support for the present manuscript (e.g., funding, provision of study materials, medical writing, article processing charges, etc.)<br><b>No time limit for this item.</b> | <input type="checkbox"/> <b>None</b>                                                                                             |                                                                                                                                                                                   |
|                                                           |                                                                                                                                                                                | General funding started in 01.04.2020 and ended 31.05.2022<br><b>German Federal Ministry of Health funded the clinical trial</b> | <b>German Federal Ministry of Health funded the clinical trial. Expense reimbursement for patient treatment paid by the sponsor DRK Blutspendedienst Baden-Württemberg Hesser</b> |
|                                                           |                                                                                                                                                                                |                                                                                                                                  | The sponsor payed the CRO Alcedis                                                                                                                                                 |
|                                                           |                                                                                                                                                                                |                                                                                                                                  | Employed at ALCEDIS                                                                                                                                                               |
|                                                           |                                                                                                                                                                                |                                                                                                                                  | ]                                                                                                                                                                                 |
| <b>Time frame: past 36 months</b>                         |                                                                                                                                                                                |                                                                                                                                  |                                                                                                                                                                                   |
| <b>2</b>                                                  | Grants or contracts from any entity (if not indicated in item #1 above).                                                                                                       | <input type="checkbox"/> <b>None</b>                                                                                             |                                                                                                                                                                                   |
|                                                           |                                                                                                                                                                                | Philipp Schnecko is an employee of Alcedis GmbH a CRO with contracts to various pharmaceutical companies.                        |                                                                                                                                                                                   |
|                                                           |                                                                                                                                                                                |                                                                                                                                  |                                                                                                                                                                                   |

|   | Name all entities with whom you have this relationship or indicate none (add rows as needed)                 | Specifications/Comments (e.g., if payments were made to you or to your institution)                                                                                                                     |  |  |  |  |  |  |
|---|--------------------------------------------------------------------------------------------------------------|---------------------------------------------------------------------------------------------------------------------------------------------------------------------------------------------------------|--|--|--|--|--|--|
| 3 | Royalties or licenses                                                                                        | <input checked="" type="checkbox"/> <b>None</b><br><table border="1" data-bbox="437 383 1011 488"> <tr><td> </td><td> </td></tr> <tr><td> </td><td> </td></tr> <tr><td> </td><td> </td></tr> </table>   |  |  |  |  |  |  |
|   |                                                                                                              |                                                                                                                                                                                                         |  |  |  |  |  |  |
|   |                                                                                                              |                                                                                                                                                                                                         |  |  |  |  |  |  |
|   |                                                                                                              |                                                                                                                                                                                                         |  |  |  |  |  |  |
| 4 | Consulting fees                                                                                              | <input checked="" type="checkbox"/> <b>None</b><br><table border="1" data-bbox="437 629 1011 734"> <tr><td> </td><td> </td></tr> <tr><td> </td><td> </td></tr> <tr><td> </td><td> </td></tr> </table>   |  |  |  |  |  |  |
|   |                                                                                                              |                                                                                                                                                                                                         |  |  |  |  |  |  |
|   |                                                                                                              |                                                                                                                                                                                                         |  |  |  |  |  |  |
|   |                                                                                                              |                                                                                                                                                                                                         |  |  |  |  |  |  |
| 5 | Payment or honoraria for lectures, presentations, speakers bureaus, manuscript writing or educational events | <input checked="" type="checkbox"/> <b>None</b><br><table border="1" data-bbox="437 853 1011 958"> <tr><td> </td><td> </td></tr> <tr><td> </td><td> </td></tr> <tr><td> </td><td> </td></tr> </table>   |  |  |  |  |  |  |
|   |                                                                                                              |                                                                                                                                                                                                         |  |  |  |  |  |  |
|   |                                                                                                              |                                                                                                                                                                                                         |  |  |  |  |  |  |
|   |                                                                                                              |                                                                                                                                                                                                         |  |  |  |  |  |  |
| 6 | Payment for expert testimony                                                                                 | <input checked="" type="checkbox"/> <b>None</b><br><table border="1" data-bbox="437 1200 1011 1305"> <tr><td> </td><td> </td></tr> <tr><td> </td><td> </td></tr> <tr><td> </td><td> </td></tr> </table> |  |  |  |  |  |  |
|   |                                                                                                              |                                                                                                                                                                                                         |  |  |  |  |  |  |
|   |                                                                                                              |                                                                                                                                                                                                         |  |  |  |  |  |  |
|   |                                                                                                              |                                                                                                                                                                                                         |  |  |  |  |  |  |
| 7 | Support for attending meetings and/or travel                                                                 | <input checked="" type="checkbox"/> <b>None</b><br><table border="1" data-bbox="437 1413 1011 1518"> <tr><td> </td><td> </td></tr> <tr><td> </td><td> </td></tr> <tr><td> </td><td> </td></tr> </table> |  |  |  |  |  |  |
|   |                                                                                                              |                                                                                                                                                                                                         |  |  |  |  |  |  |
|   |                                                                                                              |                                                                                                                                                                                                         |  |  |  |  |  |  |
|   |                                                                                                              |                                                                                                                                                                                                         |  |  |  |  |  |  |
| 8 | Patents planned, issued or pending                                                                           | <input checked="" type="checkbox"/> <b>None</b><br><table border="1" data-bbox="437 1637 1011 1742"> <tr><td> </td><td> </td></tr> <tr><td> </td><td> </td></tr> <tr><td> </td><td> </td></tr> </table> |  |  |  |  |  |  |
|   |                                                                                                              |                                                                                                                                                                                                         |  |  |  |  |  |  |
|   |                                                                                                              |                                                                                                                                                                                                         |  |  |  |  |  |  |
|   |                                                                                                              |                                                                                                                                                                                                         |  |  |  |  |  |  |
| 9 | Participation on a Data Safety Monitoring Board or Advisory Board                                            | <input checked="" type="checkbox"/> <b>None</b><br><table border="1" data-bbox="437 1861 1011 1966"> <tr><td> </td><td> </td></tr> <tr><td> </td><td> </td></tr> <tr><td> </td><td> </td></tr> </table> |  |  |  |  |  |  |
|   |                                                                                                              |                                                                                                                                                                                                         |  |  |  |  |  |  |
|   |                                                                                                              |                                                                                                                                                                                                         |  |  |  |  |  |  |
|   |                                                                                                              |                                                                                                                                                                                                         |  |  |  |  |  |  |

|           |                                                                                                   | Name all entities with whom you have this relationship or indicate none (add rows as needed) | Specifications/Comments (e.g., if payments were made to you or to your institution) |
|-----------|---------------------------------------------------------------------------------------------------|----------------------------------------------------------------------------------------------|-------------------------------------------------------------------------------------|
| <b>10</b> | Leadership or fiduciary role in other board, society, committee or advocacy group, paid or unpaid | <input checked="" type="checkbox"/> <b>None</b>                                              |                                                                                     |
|           |                                                                                                   |                                                                                              |                                                                                     |
|           |                                                                                                   |                                                                                              |                                                                                     |
| <b>11</b> | Stock or stock options                                                                            | <input checked="" type="checkbox"/> <b>None</b>                                              |                                                                                     |
|           |                                                                                                   |                                                                                              |                                                                                     |
|           |                                                                                                   |                                                                                              |                                                                                     |
| <b>12</b> | Receipt of equipment, materials, drugs, medical writing, gifts or other services                  | <input checked="" type="checkbox"/> <b>None</b>                                              |                                                                                     |
|           |                                                                                                   |                                                                                              |                                                                                     |
|           |                                                                                                   |                                                                                              |                                                                                     |
| <b>13</b> | Other financial or non-financial interests                                                        | <input checked="" type="checkbox"/> <b>None</b>                                              |                                                                                     |
|           |                                                                                                   |                                                                                              |                                                                                     |
|           |                                                                                                   |                                                                                              |                                                                                     |

Please place an "X" next to the following statement to indicate your agreement:

I certify that I have answered every question and have not altered the wording of any of the questions on this form.
